# Supplementary material for: OncoLnc: linking TCGA survival data to mRNAs, miRNAs, and lncRNAs
Source: PeerJ journal article supplement (doi:10.7717/peerj-cs.67), 2016-06-13
Supplement: TableS3.xlsx [file TableS3.xlsx]

## Sheet: BLCA
Transcript ID	Name	Cox coefficient	Raw p-value	BH-adjusted p-value	Median Expression	Mean Expression	Cox model: coxph(Surv(times,died) ~ lncrna + lowgrade + highgrade + sex + age)
T346866	MEAT136	-0.6807	1.1e-05	0.047542	8.59183	14.8614
T056321	CAT1345.1	0.5624	0.00013	0.28093	27.2834	42.9172
T167572	RAB11B-AS1.1	-0.6272	0.00022	0.316947	14.6423	22.7096
T260275	OVAT122	-0.608	0.00044	0.47542	7.9483	14.2744
T367545	LACAT5.1	0.4504	0.0011	0.95084	14.5654	36.8775
T082710	CAT1550	0.4058	0.0015	0.993917	9.46332	15.6803
T252227	PRCAT169	0.4256	0.0022	0.993917	2.54958	7.61746
T203973	CAT342.2	-0.454	0.003	0.993917	41.9463	107.902
T232879	KCCAT594	-0.4161	0.0032	0.993917	377.796	614.553
T100139	CAT1637	-0.4333	0.0034	0.993917	11.1656	25.6921
T021014	BRCAT411	0.3674	0.0046	0.993917	105.489	164.079
T127668	SMAT19	0.3936	0.0048	0.993917	30.0069	50.4464
T060115	CAT1364	0.3793	0.0049	0.993917	33.0038	47.6811
T280801	PRCAT124	-0.4206	0.006	0.993917	30.1801	67.9089
T375185	CAT2283.1	-0.3747	0.0063	0.993917	123.72	169.744
T342039	CAT1023.1	0.3949	0.007	0.993917	15.0625	61.329
T296829	LSCAT3.3	0.3502	0.0072	0.993917	10.3409	35.6331
T071398	LINC00942	0.3324	0.0088	0.993917	12.5456	398.59
T276865	CAT631	0.3451	0.0091	0.993917	7.69246	67.3535
T324416	EGFR-AS1.1	0.3195	0.0098	0.993917	11.6908	45.5835
T047636	CAT1297.3	-0.3721	0.01	0.993917	30.1609	40.2422
T254340	OVAT166.1	-0.3812	0.01	0.993917	32.1668	71.9265
T203972	CAT342.1	-0.3851	0.011	0.993917	14.582	23.407
T042544	CAT1264	0.3375	0.011	0.993917	7.52354	11.0586
T043624	BRCAT324.2	-0.4111	0.011	0.993917	2.28914	15.6053
T151789	CAT1961.3	-0.3435	0.011	0.993917	22.2835	66.0844
T353392	CAT1115.3	-0.3936	0.011	0.993917	14.1072	18.8986
T190388	CAT248	0.3293	0.012	0.993917	6.32934	10.1444
T023464	BRCAT341	-0.3414	0.013	0.993917	6.29043	10.7156
T237107	BHLHE40-AS1	0.3304	0.013	0.993917	24.4821	33.7841
T324407	CAT941.2	0.3157	0.013	0.993917	74.2798	270.925
T048559	LVCAT33	0.3363	0.013	0.993917	164.211	333.544
T259514	KCCAT605	-0.3848	0.013	0.993917	22.8985	54.2363
T237047	ITPR1-AS1	-0.3489	0.014	0.993917	21.8559	35.9968
T342971	LSCAT40.3	-0.3579	0.014	0.993917	5.69712	9.78397
T149818	CAT1947.1	0.3264	0.014	0.993917	26.9157	144.999
T223549	LSCAT7	0.3483	0.014	0.993917	6.5581	26.8402
T190816	LSCAT142	-0.3942	0.014	0.993917	4.0534	13.2913
T152679	CAT1967.1	-0.311	0.015	0.993917	149.864	209.899
T136787	PRCAT153	-0.3675	0.015	0.993917	2.21049	4.6186
T320528	HOXA-AS2.2	0.3473	0.015	0.993917	14.1415	26.707
T248388	PRCAT151	-0.3712	0.015	0.993917	1.56877	2.51294
T027822	CAT148	0.3242	0.015	0.993917	4.27302	13.0918
T270264	SNHG8.1	-0.3114	0.016	0.993917	191.848	306.693
T100137	CAT1636.1	-0.3615	0.016	0.993917	22.0944	51.3002
T324413	KCCAT484	0.3021	0.017	0.993917	8.82809	31.6925
T174315	LINC00665.3	-0.3396	0.017	0.993917	68.808	119.607
T293377	CAT745.1	0.3309	0.017	0.993917	113.979	225.796
T375174	MBAT6	-0.3416	0.018	0.993917	20.6097	31.6736
T325122	CAT942.2	-0.3252	0.018	0.993917	132.482	161.636
T196663	MEAT113	-0.3249	0.019	0.993917	28.0843	45.8926
T118005	CAT1764.1	-0.3194	0.021	0.993917	23.0427	36.7442
T102856	LACAT79	0.3184	0.021	0.993917	91.9487	116.002
T254341	OVAT194	-0.3622	0.022	0.993917	3.4136	10.9876
T113833	KCCAT470	0.2986	0.022	0.993917	84.6147	151.275
T259280	KPCAT2.1	0.3202	0.023	0.993917	18.2642	35.696
T353381	CAT1115.1	-0.3389	0.023	0.993917	15.223	26.3058
T377599	KCCAT688	-0.3032	0.023	0.993917	6.99102	12.6378
T175450	THCAT353	-0.3491	0.023	0.993917	2.40555	3.86494
T258262	LINC00885.2	-0.3223	0.024	0.993917	31.1094	57.7278
T169318	BRCAT270	0.3	0.024	0.993917	73.5955	129.689
T296830	LSCAT3.2	0.3117	0.025	0.993917	15.9891	68.7507
T152680	CAT1967.2	-0.3006	0.025	0.993917	35.7556	57.088
T382727	PRCAT188.2	0.2855	0.026	0.993917	24.0061	37.2657
T292349	KCCAT563	-0.3301	0.026	0.993917	2.5697	10.3665
T382726	PRCAT188.3	0.289	0.027	0.993917	5.93368	10.0629
T031976	MBAT57	-0.317	0.027	0.993917	75.9499	108.618
T087497	KCCAT135.1	0.2773	0.027	0.993917	4.10431	14.7112
T059015	KCCAT328	0.2988	0.027	0.993917	9.01551	28.426
T016778	OVAT148	-0.3207	0.027	0.993917	8.42504	16.7539
T244169	KHCAT183	-0.3198	0.028	0.993917	8.08583	11.9658
T211428	HNCAT283	0.3131	0.028	0.993917	5.7485	20.9461
T077376	CAT1501.4	-0.3267	0.028	0.993917	519.135	781.783
T188691	LACAT16.1	-0.327	0.029	0.993917	47.1531	230.304
T128960	PNAT101	0.3078	0.029	0.993917	38.7298	52.091
T166200	CAT2044	-0.3375	0.029	0.993917	9.3508	13.6431
T180043	UTAT26	-0.3398	0.03	0.993917	62.1526	267.381
T207123	CAT365	0.2937	0.03	0.993917	14.5318	20.9743
T218487	CAT2170	0.2989	0.03	0.993917	11.6886	47.2416
T184382	CAT209	-0.2925	0.031	0.993917	27.7773	48.9193
T192664	CAT266.4	-0.2905	0.032	0.993917	56.652	85.0497
T140995	CAT1898	0.2827	0.033	0.993917	22.0083	74.8559
T258422	AMAT57	-0.292	0.033	0.993917	5.29513	6.74342
T058260	AMAT172	-0.3258	0.033	0.993917	1.31597	2.08323
T030998	CAT171.3	0.3249	0.033	0.993917	13.4054	54.6629
T056308	CAT1345.2	0.2959	0.033	0.993917	7.8608	21.8515
T366807	THCAT128	0.2812	0.033	0.993917	2.36182	7.93339
T244127	KHCAT253	0.2958	0.034	0.993917	5.75562	8.3717
T196780	CAT293.1	0.2859	0.034	0.993917	22.7286	43.5609
T038476	CAT1242.3	-0.2898	0.034	0.993917	42.9462	82.6449
T100138	CAT1636.2	-0.3207	0.034	0.993917	26.7727	57.4919
T131736	KHCAT193	-0.34	0.035	0.993917	2.7699	5.56837
T364652	CAT1180	-0.3188	0.035	0.993917	5.4153	8.00062
T240653	AMAT5	-0.2997	0.035	0.993917	50.1874	69.3136
T187946	THCAT573	-0.3091	0.035	0.993917	10.922	16.0476
T047638	LACAT97	-0.3113	0.036	0.993917	11.6624	17.6948
T275812	CAT623.2	0.287	0.036	0.993917	9.05725	28.06
T272470	CAT589	0.2941	0.036	0.993917	74.8121	98.544
T307090	PRCAT257	0.2796	0.036	0.993917	9.7501	13.9193
T093343	KHCAT211	-0.3174	0.036	0.993917	3.44326	6.62812
T340567	CAT1015	0.2778	0.037	0.993917	99.9259	148.972
T241245	KHCAT284	-0.3122	0.037	0.993917	127.542	152.476
T266371	CAT556	-0.2959	0.037	0.993917	101.918	142.667
T037321	LVCAT59	-0.2867	0.037	0.993917	2.64609	4.14282
T377799	KCCAT598	-0.3144	0.038	0.993917	4.19566	8.81107
T188502	CAT236	0.259	0.039	0.993917	7.23891	13.1477
T317019	HNCAT160	0.2624	0.039	0.993917	8.77202	14.2681
T324412	KCCAT354	0.277	0.041	0.993917	4.65629	49.9858
T132489	CAT1852.2	0.2752	0.041	0.993917	96.6019	331.264
T256728	CAT491.3	-0.314	0.041	0.993917	112.748	171.571
T220769	KCCAT106	0.2849	0.041	0.993917	111.864	230.739
T078055	OVAT21	0.267	0.041	0.993917	1481.57	2148.29
T225781	CAT2207	-0.2933	0.042	0.993917	4.72911	26.8984
T175227	MBAT106	0.2741	0.042	0.993917	263.483	580.662
T254335	OVAT134	-0.3376	0.042	0.993917	2.80269	5.62251
T074169	HNCAT291	-0.2878	0.043	0.993917	68.2257	103.783
T232633	CAT2240	-0.2823	0.043	0.993917	11.116	27.5287
T043623	BRCAT324.1	-0.3201	0.043	0.993917	3.8854	10.2803
T358162	CAT1141.3	-0.2682	0.043	0.993917	75.0257	117.069
T031012	CAT170.2	0.2659	0.044	0.993917	4.05202	54.2573
T033010	MEAT143	0.2701	0.044	0.993917	11.7181	18.6547
T002705	CAT12.3	0.2737	0.044	0.993917	8.98156	16.4121
T285881	KCCAT259	0.2708	0.045	0.993917	5.47899	33.6508
T261656	CAT520	0.2638	0.045	0.993917	24.7306	44.5373
T335572	ATP6V0E2-AS1.1	-0.309	0.045	0.993917	8.49315	14.608
T149408	CAT1943	0.249	0.045	0.993917	174.881	244.512
T005622	KCCAT477	0.279	0.046	0.993917	12.276	24.9174
T347610	CAT1062.3	-0.2638	0.046	0.993917	34.7536	51.7821
T062260	CAT1379	0.2713	0.046	0.993917	2.42752	3.93808
T305490	CAT817.2	0.2735	0.046	0.993917	19.0406	64.8942
T113462	LACAT237	0.2741	0.046	0.993917	12.1351	18.268
T254338	OVAT166.2	-0.325	0.047	0.993917	15.0152	26.9893
T196775	MIR4435-1HG.5	0.2515	0.047	0.993917	13.713	26.7104
T182559	THCAT294	-0.2616	0.047	0.993917	8.27973	14.8923
T307134	CAT829	-0.3075	0.048	0.993917	46.6108	55.8494
T059591	LSCAT196	0.2568	0.048	0.993917	4.34738	7.48349
T229128	LVCAT9	-0.267	0.049	0.993917	48.107	68.0129
T078694	CAT1515	-0.2441	0.049	0.993917	17.7852	52.8757
T252948	MME-AS1.2	0.272	0.049	0.993917	19.1381	66.4791
T175631	MEAT133	0.2469	0.049	0.993917	123.035	245.75
T257703	TMEM44-AS1.3	-0.2819	0.049	0.993917	11.7841	21.8099
T296827	LSCAT3.1	0.2775	0.049	0.993917	30.7334	79.8149
T111739	CAT1709.1	0.2879	0.05	0.993917	13.1479	18.7898
T269691	KHCAT185	-0.3184	0.05	0.993917	40.3593	49.9129
T055917	NAV2-AS1	0.2638	0.05	0.993917	79.4019	132.2
T018596	CAT99.2	0.2592	0.051	0.993917	225.571	315.739
T107626	CMAT13	0.2612	0.051	0.993917	9.48171	13.9771
T247981	KCCAT337	-0.285	0.051	0.993917	12.6657	27.212
T227058	CAT2215.2	-0.2677	0.051	0.993917	7.87071	547.728
T037630	CAT1233	-0.2578	0.051	0.993917	34.5481	78.9607
T353383	CAT1115.2	-0.295	0.051	0.993917	28.0228	41.3317
T226011	CAT2210	-0.3031	0.051	0.993917	41.2068	86.4086
T233088	KCCAT580	0.282	0.051	0.993917	9.47019	25.064
T187398	AMAT122	-0.252	0.052	0.993917	3.34533	5.37844
T184523	CAT213	-0.264	0.052	0.993917	16.6431	30.6925
T167068	CAT2053	0.2486	0.052	0.993917	3.61634	17.1172
T178407	KCCAT476	-0.304	0.052	0.993917	163.648	391.74
T063079	LACAT40	-0.2745	0.052	0.993917	2.95516	8.27417
T261295	CAT517.3	-0.2796	0.052	0.993917	3.85856	6.77889
T032228	BRCAT81	0.2573	0.052	0.993917	5.73516	8.79118
T312362	CAT870.1	0.2425	0.053	0.993917	11.3608	21.9939
T261126	CAT515	0.2642	0.053	0.993917	25.2514	61.326
T050619	BRCAT89	0.2588	0.053	0.993917	2.48091	3.7044
T238675	THCAT459	-0.2752	0.053	0.993917	3.8703	4.83802
T034590	CAT195.2	-0.2758	0.053	0.993917	7.24152	10.2054
T225028	CAT2202.1	-0.257	0.053	0.993917	48.9734	70.32
T305489	LSCAT73	0.2767	0.054	0.993917	5.85654	19.8825
T319132	CAT908.2	-0.2929	0.054	0.993917	6.37613	13.8531
T218273	OSER1-AS1.1	-0.2601	0.054	0.993917	243.042	338.382
T029209	LSCAT281	0.267	0.054	0.993917	7.2087	19.8725
T203798	TTN-AS1.5	-0.276	0.054	0.993917	4.89657	8.51603
T009282	CAT41	0.2597	0.054	0.993917	5.87905	12.2723
T227258	CAT2216.1	0.2442	0.054	0.993917	34.4256	62.2135
T367340	CAT1202.2	0.2527	0.054	0.993917	12.6437	21.575
T330617	LINC01004.1	-0.262	0.055	0.993917	7.7824	12.1801
T203783	TTN-AS1.2	0.2655	0.055	0.993917	9.31805	14.3692
T366403	MIR181A2HG.1	-0.2713	0.055	0.993917	14.3735	24.6985
T225029	CAT2202.2	-0.2581	0.055	0.993917	13.7437	21.9757
T093996	TPT1-AS1	-0.2738	0.056	0.993917	32.8905	59.3236
T045001	LINC00857.3	0.2533	0.056	0.993917	32.2196	59.905
T125769	MBAT96	0.2577	0.056	0.993917	24.9381	29.3191
T029335	KHCAT4	0.2611	0.056	0.993917	2.9337	8.84025
T324410	CAT941.1	0.2356	0.057	0.993917	121.403	429.461
T120550	CAT1777	-0.251	0.057	0.993917	14.8415	207.358
T158337	KCCAT115	-0.2777	0.057	0.993917	2.15029	6.64792
T088088	KHCAT168	0.2681	0.058	0.993917	12.7329	17.1336
T048719	CAT1304	-0.2739	0.058	0.993917	16.1691	25.6261
T305491	CAT817.1	0.2605	0.058	0.993917	3.88261	8.81129
T167413	CAT2055	0.2531	0.058	0.993917	5.39277	11.7992
T145493	CAT1925	0.2746	0.058	0.993917	38.2899	49.243
T167996	CAT2061	-0.2895	0.059	0.993917	6.33082	39.6691
T169832	BRCAT88	-0.2888	0.059	0.993917	27.2652	129.79
T207121	CAT364	0.2531	0.059	0.993917	9.92548	19.4061
T171495	MBAT65	-0.2571	0.059	0.993917	19.0525	41.0707
T306350	LINC00472.2	-0.249	0.059	0.993917	0.193184	5.52748
T136494	CAT1873	0.272	0.06	0.993917	27.4319	47.4627
T049521	UTAT56	-0.2797	0.06	0.993917	11.0256	17.3119
T123682	CAT1796	0.2434	0.061	0.993917	528.919	1770.14
T208675	CAT371	-0.2472	0.061	0.993917	26.973	34.1699
T126032	KCCAT35.1	0.2237	0.061	0.993917	73.3813	118.107
T031878	MBAT102	0.2285	0.063	0.993917	86.5292	109.698
T042364	LSCAT160	-0.2417	0.063	0.993917	7.09897	12.0333
T181772	ZNF667-AS1.4	-0.2527	0.064	0.993917	80.2203	322.899
T047958	CAT1299	-0.2825	0.064	0.993917	67.6003	99.1422
T105978	CAT1680	0.2457	0.064	0.993917	32.6236	46.8656
T302079	CAT792	-0.2657	0.064	0.993917	51.0244	70.2238
T073015	CAT1466.2	0.2634	0.065	0.993917	2.49971	8.63915
T018833	CAT101.1	-0.2456	0.065	0.993917	18.7896	37.569
T181966	CAT2134.2	-0.2728	0.065	0.993917	591.028	781.737
T214861	KHCAT163	-0.2691	0.066	0.993917	2.50029	3.77598
T282591	CAT664.1	0.226	0.066	0.993917	10.0192	33.4091
T011536	CAT55	0.2337	0.066	0.993917	8.67044	19.2011
T372050	PHKA2-AS1.2	-0.2522	0.067	0.993917	5.13684	7.82219
T265721	KHCAT199	-0.2818	0.067	0.993917	17.683	29.868
T002711	CAT12.1	0.233	0.067	0.993917	85.9502	138.098
T324409	CAT941.3	0.242	0.067	0.993917	66.454	413.417
T126159	CAT1812	0.2578	0.068	0.993917	56.9781	71.0975
T022591	CAT122	0.243	0.068	0.993917	283.501	555.722
T297391	CAT769	-0.2433	0.068	0.993917	6.83429	11.9172
T293376	CAT745.2	0.2738	0.068	0.993917	5.31278	11.1341
T076525	OVAT17.1	-0.234	0.068	0.993917	3.08616	4.88863
T327256	CMAT10	0.2477	0.069	0.993917	11.2955	16.6476
T348199	CAT1069	-0.2425	0.069	0.993917	200.245	278.257
T329662	THCAT197	-0.2591	0.07	0.993917	7.79264	12.048
T006588	OVAT16	-0.2557	0.07	0.993917	14.0762	22.7204
T266618	CAT558.2	-0.2815	0.07	0.993917	8.52887	25.4566
T124682	CAT1801	0.2278	0.07	0.993917	68.2459	98.9179
T198693	CAT308.1	-0.2668	0.071	0.993917	3.69622	6.26808
T257682	TMEM44-AS1.4	-0.2682	0.071	0.993917	38.9998	61.3955
T241304	ZNF197-AS1.2	-0.2567	0.071	0.993917	14.7066	20.73
T049804	CAT1313	0.2492	0.072	0.993917	4.33409	10.6299
T055823	BRCAT73.2	-0.2677	0.072	0.993917	4.23934	9.16488
T153059	CAT1968.1	-0.2812	0.073	0.993917	29.0314	39.2979
T288425	BRCAT366.2	-0.2638	0.074	0.993917	49.0199	98.7141
T143039	CAT1913	0.243	0.074	0.993917	39.8174	49.0233
T103594	KHCAT73.1	-0.2741	0.074	0.993917	5.01076	30.0939
T366746	CAT1197	-0.2499	0.075	0.993917	36.7765	59.5286
T257649	LINC00884.1	-0.2571	0.075	0.993917	9.23083	31.0375
T059190	CAT1361.2	-0.2617	0.076	0.993917	119.682	147.459
T191967	KHCAT428	0.2484	0.076	0.993917	11.4407	15.5073
T346149	CAT1054	-0.2596	0.076	0.993917	12.1886	39.1383
T267078	BRCAT289	-0.2691	0.077	0.993917	3.11522	5.09932
T116827	MEAT38	0.2547	0.077	0.993917	14.4063	25.2879
T011943	THCAT529.1	0.2593	0.077	0.993917	17.9006	30.4456
T281636	CAT655.2	0.2381	0.078	0.993917	292.476	416.989
T162916	THCAT619	0.2534	0.078	0.993917	4.43495	9.82605
T131898	HNCAT90	0.2516	0.078	0.993917	3.50616	7.03482
T336636	CAT996	-0.2651	0.078	0.993917	5.33666	13.3816
T172633	HICLINC365.1	-0.2492	0.078	0.993917	6.33487	10.268
T073019	CAT1466.3	0.2467	0.079	0.993917	3.72518	10.9177
T254324	OVAT107	-0.2657	0.079	0.993917	3.20512	8.22366
T344191	CAT1044	0.2236	0.079	0.993917	92.3113	132.717
T306349	LINC00472.1	0.2194	0.079	0.993917	10.0902	20.6902
T302914	OVAT51	-0.2715	0.079	0.993917	12.2469	18.4487
T054686	SBF2-AS1.5	0.2559	0.079	0.993917	38.1662	62.63
T021945	CAT118.2	0.2214	0.079	0.993917	32.114	54.2093
T350817	KHCAT206	0.234	0.08	0.993917	12.5454	27.2391
T259898	THCAT12.3	-0.2876	0.08	0.993917	18.0307	49.0022
T261164	CAT516.1	0.2337	0.08	0.993917	7.84379	20.1146
T253102	LINC00886.1	-0.2475	0.08	0.993917	13.294	24.5125
T281799	MBAT101	-0.2375	0.08	0.993917	173.303	220.104
T149838	CAT1948.5	0.236	0.08	0.993917	4.84044	40.7626
T341586	CAT1021	0.247	0.08	0.993917	7.10407	66.4978
T350192	SAMD12-AS1.2	-0.2495	0.08	0.993917	10.3898	38.9506
T148949	MAP3K14-AS1.1	-0.2206	0.08	0.993917	144.507	196.376
T036641	KHCAT433	0.223	0.08	0.993917	62.4944	102.172
T032227	HRAT14	0.2262	0.08	0.993917	9.02216	12.7965
T247979	KCCAT192	-0.2406	0.08	0.993917	20.0393	42.324
T177475	AMAT9	-0.2687	0.081	0.993917	277.642	411.328
T076550	BRCAT254	0.2417	0.081	0.993917	12.3769	16.2708
T366910	CAT1199.1	-0.225	0.081	0.993917	10.9398	19.0907
T056291	LSCAT95	0.2334	0.081	0.993917	12.0621	23.3774
T174866	MEAT110	-0.2316	0.081	0.993917	13.4907	25.9516
T249970	CAT445	-0.2179	0.081	0.993917	52.7211	112.174
T315963	CAT893.6	0.2463	0.081	0.993917	40.4261	106.663
T376236	CAT2289.1	0.2256	0.081	0.993917	89.4167	152.32
T113567	BRCAT418	0.2218	0.082	0.993917	10.0358	17.4644
T272608	KCCAT540	0.2542	0.083	0.993917	4.26696	11.8539
T100201	CAT1638	-0.257	0.083	0.993917	10.7922	28.5809
T284974	CAT683	0.2359	0.084	0.993917	3.19486	6.46367
T214610	THCAT420	0.2523	0.084	0.993917	4.38148	11.6094
T190843	CAT255.1	0.2156	0.085	0.993917	873.501	1261.13
T104969	CAT1669.2	0.2547	0.085	0.993917	6.10193	14.7765
T241933	KIF9-AS1.2	-0.2275	0.086	0.993917	31.797	43.2284
T073016	CAT1466.1	0.22	0.087	0.993917	4.26439	17.5467
T330111	CAT962	0.218	0.087	0.993917	19.6491	90.3293
T015184	CAT77	0.2234	0.087	0.993917	2.89376	5.87062
T049511	CAT1308	0.2399	0.087	0.993917	3.54436	5.0437
T170645	THCAT469	-0.2517	0.087	0.993917	13.6496	21.3915
T143570	CAT1914	0.2217	0.087	0.993917	676.076	985.421
T002642	PNAT100	-0.275	0.088	0.993917	11.9473	20.707
T053960	THCAT266	0.2343	0.088	0.993917	2.04133	3.67274
T216093	CAT2154.2	-0.231	0.088	0.993917	5.1958	7.30579
T130417	MEAT129	0.2165	0.088	0.993917	41.2612	65.1425
T196995	CAT298	-0.2257	0.088	0.993917	12.6037	19.6625
T346505	CAT1056	-0.2354	0.089	0.993917	20.8401	59.5353
T078958	LSCAT8	0.2345	0.089	0.993917	4.62669	45.633
T342975	LSCAT40.1	-0.254	0.089	0.993917	9.35163	22.9542
T030862	CAT168	-0.226	0.09	0.993917	6.39098	13.5069
T199859	LSCAT138	-0.2337	0.09	0.993917	6.07822	11.4936
T225716	HNCAT227	-0.2159	0.09	0.993917	40.6458	64.8505
T203399	HOXD-AS2.1	0.205	0.091	0.993917	3.71068	4.55091
T153124	CAT1969.3	0.2274	0.091	0.993917	2.19901	6.67977
T206320	CAT356	0.2262	0.091	0.993917	15.787	68.1799
T150343	CAT1951	0.2206	0.091	0.993917	7.78421	15.4866
T151507	THCAT425	-0.2265	0.091	0.993917	1.80113	5.59409
T353067	PRCAT268	0.2415	0.092	0.993917	2.1337	68.8743
T231037	LACAT268	-0.2103	0.092	0.993917	145.456	192.441
T206895	CAT363	-0.2388	0.093	0.993917	3.06511	9.58907
T133266	KHCAT230	0.2241	0.094	0.993917	4.11019	8.31638
T308340	LACAT89	-0.2559	0.095	0.993917	49.9294	207.832
T190629	CAT251	0.2084	0.095	0.993917	14.3007	19.4872
T287735	LINC00992.2	-0.2374	0.096	0.993917	38.211	66.7322
T165339	CAT2041.1	0.2281	0.096	0.993917	8.3319	20.3601
T259285	KPCAT2.2	0.2491	0.096	0.993917	19.5595	44.1742
T148546	MEAT128	-0.2464	0.097	0.993917	77.386	124.987
T050283	CAT1315	0.2305	0.097	0.993917	8.04396	21.4555
T232202	TUG1.4	-0.234	0.097	0.993917	5243.55	6340.72
T077372	CAT1501.3	-0.2425	0.097	0.993917	1007.3	1286.48
T098885	LINC01067	-0.2358	0.097	0.993917	11.6604	21.8671
T346170	CAT1055	-0.2242	0.098	0.993917	12.64	31.586
T169636	KCCAT496	0.2181	0.098	0.993917	13.017	28.4716
T019217	BRCAT117	0.2384	0.098	0.993917	6.85398	11.0868
T027825	CAT149.2	0.2359	0.098	0.993917	67.2135	103.508
T099201	SMAT8	0.2246	0.098	0.993917	12.1262	21.0277
T284253	CAT675	0.1991	0.098	0.993917	18.5899	35.0489
T281893	BRCAT160	-0.2308	0.099	0.993917	2.62917	4.10596
T190842	CAT255.2	-0.2316	0.099	0.993917	6.23758	11.751
T048718	CAT1303	-0.253	0.099	0.993917	21.1837	27.828
T215971	HM13-AS1.2	0.2051	0.099	0.993917	16.8915	28.0497
T268988	HICLINC105.1	-0.238	0.099	0.993917	7.42734	15.4851
T348280	CAT1070	-0.204	0.1	0.993917	25.5876	45.5371
T176285	HRAT8	-0.2301	0.1	0.993917	8.43058	13.7143
T061702	OVAT47	-0.2233	0.1	0.993917	28.3078	42.3598
T372142	KCCAT663	0.2306	0.1	0.993917	1.44287	2.11208
T093217	KCCAT398	-0.2343	0.1	0.993917	7.55215	14.0356
T346726	CAT1058.2	-0.2003	0.1	0.993917	153.797	244.943
T073758	BRCAT421	0.2318	0.1	0.993917	4.9044	9.62432
T375415	MBAT78	-0.2162	0.1	0.993917	84.197	127.114
T241014	CCDC13-AS1	-0.2422	0.1	0.993917	2.38727	4.50932
T198493	KPCAT9	-0.2327	0.1	0.993917	3.46845	4.95803
T272838	CAT594.2	-0.2351	0.1	0.993917	6.17299	10.2106
T144723	UTAT55	-0.2211	0.1	0.993917	7.75	12.0894
T006036	UTAT19	-0.2174	0.1	0.993917	710.035	864.536
T039822	OVAT13	-0.2302	0.1	0.993917	17.7716	34.0217
T349586	AMAT6	0.2063	0.1	0.993917	164.26	226.701
T081965	KCCAT531	-0.2438	0.1	0.993917	39.3466	90.1052
T132485	CAT1852.1	0.2281	0.1	0.993917	4.17282	8.79896
T030992	CAT171.2	0.235	0.1	0.993917	17.1121	65.5035
T320524	HOXA-AS2.5	0.2249	0.1	0.993917	66.7606	137.767
T252785	KCCAT39	0.219	0.1	0.993917	12.3446	24.3672
T049499	CAT1307	0.2215	0.1	0.993917	15.7415	26.4243
T081595	OVAT154	-0.2443	0.1	0.993917	2.45105	4.93073
T237325	CAT382	0.2146	0.1	0.993917	7.23026	18.1252
T087800	CAT1576	0.2079	0.1	0.993917	11.2886	23.5054
T239901	AMAT136	-0.2356	0.1	0.993917	6.88189	10.9894
T277882	LSCAT1.1	0.2073	0.1	0.993917	475.617	672.73
T111204	CAT1707	0.2182	0.1	0.993917	30.3849	48.8809
T260537	THCAT70.2	-0.2324	0.1	0.993917	14.0949	30.4025
T290750	KCCAT34	-0.2362	0.1	0.993917	7.41596	19.1272
T224779	PRCAT221	-0.2213	0.1	0.993917	15.5892	30.5623
T372051	PHKA2-AS1.1	-0.2191	0.1	0.993917	8.42494	15.8817
T149628	HICLINC345.1	-0.2312	0.1	0.993917	6.32518	10.0925
T324414	EGFR-AS1.3	0.2111	0.11	0.993917	19.3614	75.8646
T306889	CAT826	0.2311	0.11	0.993917	28.168	69.7733
T334719	CAT987	-0.225	0.11	0.993917	37.0752	96.9132
T162496	CAT2019	0.2361	0.11	0.993917	7.03923	31.87
T189802	CAT242.1	0.193	0.11	0.993917	77.9688	97.7353
T372052	PHKA2-AS1.3	0.2054	0.11	0.993917	2.47601	4.69482
T193443	LINC00152.2	0.226	0.11	0.993917	53.6908	133.74
T110091	MEAT131	0.2267	0.11	0.993917	14.5682	31.4397
T235526	CAT2259.1	0.215	0.11	0.993917	12.0503	31.5549
T041025	KCCAT251	-0.2508	0.11	0.993917	66.4115	143.084
T073831	CAT1472.1	-0.1977	0.11	0.993917	103.635	152.315
T184386	BRCAT45	-0.2201	0.11	0.993917	6.65397	12.998
T242348	CAT403.1	0.2168	0.11	0.993917	248.637	289.038
T030338	CAT162.1	0.1858	0.11	0.993917	514.66	744.846
T087152	AMAT48	0.2133	0.11	0.993917	19.6729	28.3497
T295962	CAT760.1	0.206	0.11	0.993917	6.21235	7.41508
T270510	CAT581	0.2037	0.11	0.993917	104.832	138.031
T196696	BRCAT17	-0.2054	0.11	0.993917	10.9986	14.5971
T312316	CAT868	0.2128	0.11	0.993917	76.5571	153.391
T330239	KCCAT375	0.2125	0.11	0.993917	14.8555	23.5657
T315257	KCCAT132	-0.2263	0.11	0.993917	2.83951	5.38172
T258393	LINC01063	-0.2478	0.11	0.993917	2.93571	5.65629
T172965	KHCAT3.2	-0.211	0.11	0.993917	41.6508	77.6558
T166766	TINCR.1	0.2102	0.11	0.993917	773.517	1312.6
T219719	CAT2179.2	0.2119	0.11	0.993917	9.37999	15.1588
T038412	LACAT195	-0.231	0.11	0.993917	2.52389	4.41901
T298260	THCAT337	-0.2301	0.11	0.993917	3.9057	9.45009
T205780	CFLAR-AS1.2	0.2181	0.11	0.993917	16.4892	23.3999
T226507	LINC00323	0.2091	0.11	0.993917	4.6795	62.4877
T225404	LINC00649.2	-0.2157	0.11	0.993917	193.564	224.383
T257300	PRCAT276	-0.2174	0.12	0.993917	178.878	1309.64
T082905	LSCAT260	-0.2365	0.12	0.993917	3.60758	7.22805
T172132	LINC00662.1	0.2039	0.12	0.993917	84.7281	106.236
T000790	CAT4.1	0.2238	0.12	0.993917	43.699	98.0935
T038491	CAT1242.2	-0.229	0.12	0.993917	23.2615	52.6847
T125200	SNHG9	-0.2266	0.12	0.993917	151.697	229.818
T275431	CAT617	0.1887	0.12	0.993917	32.7635	53.1062
T286846	MBAT95	-0.2265	0.12	0.993917	25.1483	33.432
T189061	BCYRN1	-0.2358	0.12	0.993917	4.01865	16.4453
T109603	DICER1-AS1	-0.2054	0.12	0.993917	105.222	169.902
T319200	KCCAT333.4	-0.2407	0.12	0.993917	39.634	230.259
T118026	AMAT119	0.205	0.12	0.993917	4.93384	6.45483
T314343	CAT884	0.2083	0.12	0.993917	405.049	650.975
T180044	KCCAT397	0.2168	0.12	0.993917	16.1235	50.503
T184375	CAT208	-0.2049	0.12	0.993917	8.41349	13.9159
T196782	CAT293.2	0.2052	0.12	0.993917	13.004	21.3445
T345231	KCCAT696	-0.2234	0.12	0.993917	5.913	12.7792
T247980	KCCAT301	-0.2149	0.12	0.993917	29.9429	71.6822
T338827	BRCAT252.1	0.2146	0.12	0.993917	2.88926	4.77173
T268324	CAT574	0.2211	0.12	0.993917	15.7365	25.731
T190557	CAT250.1	-0.216	0.12	0.993917	57.3289	82.5361
T032371	KCCAT536	0.217	0.12	0.993917	13.739	45.4485
T327806	CAT949.2	-0.2023	0.12	0.993917	20.6072	28.4986
T036866	GATA3-AS1.4	-0.2396	0.12	0.993917	70.9102	214.614
T119007	LACAT149	0.1989	0.12	0.993917	2.37244	3.66396
T334108	CAT982.1	0.1898	0.12	0.993917	9.36737	27.4847
T014432	BRCAT392	-0.2285	0.12	0.993917	16.3833	24.8221
T088506	UTAT5	0.2192	0.12	0.993917	23.9924	45.5195
T063075	CAT1388.2	-0.235	0.12	0.993917	43.4912	69.9632
T256721	CAT491.2	-0.226	0.12	0.993917	10.0161	19.676
T227447	KCCAT448	-0.2318	0.12	0.993917	153.695	256.042
T162261	BRCAT296	-0.2218	0.12	0.993917	4.3198	5.79667
T073332	A2M-AS1.2	-0.2145	0.12	0.993917	13.0404	19.3633
T371666	CVAT1	-0.2029	0.12	0.993917	22.5324	27.9687
T169313	BRCAT393	0.1929	0.12	0.993917	659.851	1017.12
T364935	THCAT63	0.1996	0.12	0.993917	251.389	409.592
T216172	OVAT22	-0.2308	0.12	0.993917	12.1374	29.5318
T180070	CAT2126	-0.2087	0.12	0.993917	184.671	233.829
T348695	LSCAT99	-0.207	0.12	0.993917	15.2523	36.679
T065380	CAT1406.1	-0.1966	0.12	0.993917	7.58523	13.1275
T287834	CAT706	-0.219	0.12	0.993917	28.357	42.8068
T237117	MBAT82	0.1972	0.12	0.993917	173.907	353.899
T358163	CAT1141.4	-0.2002	0.12	0.993917	1127.72	1575.16
T266622	CAT559.1	-0.2244	0.12	0.993917	33.178	60.4055
T164334	CAT2031	0.2008	0.12	0.993917	49.9634	86.4797
T066000	CAT1411	0.1889	0.12	0.993917	97.2426	154.268
T023588	CAT127	-0.2001	0.13	0.993917	23.7131	43.138
T177897	CAT2118.1	0.2032	0.13	0.993917	10.9985	63.5937
T316759	CAT896	0.2162	0.13	0.993917	34.5879	67.9369
T290659	CAT728	0.2038	0.13	0.993917	8.09844	12.34
T180581	CAT2130	0.2091	0.13	0.993917	141.209	276.571
T118714	CAT1767	0.1946	0.13	0.993917	15.3997	31.8829
T320927	CAT918.1	-0.221	0.13	0.993917	65.3576	114.546
T073281	ESAT3	-0.2005	0.13	0.993917	19.184	298.907
T000487	CAT3	-0.2322	0.13	0.993917	131.5	274.387
T291825	THCAT523	-0.1925	0.13	0.993917	11.4201	21.2673
T199999	CAT313.5	0.1987	0.13	0.993917	20.2185	26.5153
T037986	LVCAT67.2	-0.2118	0.13	0.993917	37.3803	96.9805
T023851	LACAT65	0.2121	0.13	0.993917	5.09244	23.8312
T287629	KCCAT422	-0.2186	0.13	0.993917	7.43178	12.8533
T350595	BRCAT129	-0.185	0.13	0.993917	5.8485	8.20007
T139937	CAT1896.2	0.2107	0.13	0.993917	8.86345	32.0692
T054676	SBF2-AS1.4	0.2193	0.13	0.993917	27.3776	43.6851
T141594	CAT1902	0.208	0.13	0.993917	20.8675	49.3831
T253106	LINC00886.2	-0.2199	0.13	0.993917	10.4302	16.72
T250694	CAT448	-0.212	0.13	0.993917	12.5715	19.4528
T218748	HNCAT13	0.2199	0.13	0.993917	65.8149	267.586
T129765	CAT1840.2	0.209	0.13	0.993917	14.8437	34.5092
T190580	THCAT467.2	0.2339	0.13	0.993917	4.49105	7.68177
T163304	LSCAT111	0.203	0.13	0.993917	3.19472	11.3728
T123654	CAT1795	0.214	0.13	0.993917	30.0584	76.87
T228000	LINC00316	0.227	0.13	0.993917	5.25593	15.4482
T228577	KCCAT665.2	0.2014	0.13	0.993917	80.9471	331.788
T062242	CAT1378.2	0.212	0.13	0.993917	45.717	75.238
T355241	THCAT290	-0.1943	0.13	0.993917	16.9674	28.5968
T191209	BRCAT215	0.2051	0.13	0.993917	5.2606	8.28494
T319312	KCCAT333.2	-0.2266	0.13	0.993917	50.0385	425.935
T355787	CAT1133	-0.2205	0.13	0.993917	4.19665	6.93955
T248876	ARHGAP31-AS1	-0.2188	0.13	0.993917	14.4674	24.8892
T330032	CAT961	-0.2237	0.13	0.993917	132.608	229.861
T108066	CAT1694.2	-0.2368	0.13	0.993917	11.5375	16.1104
T376237	CAT2289.2	-0.2419	0.13	0.993917	4.90151	58.0619
T190091	CAT244	0.192	0.13	0.993917	46.2993	101.926
T084303	CAT1561	0.1848	0.13	0.993917	9.81111	19.2566
T139456	KCCAT63	0.2	0.13	0.993917	5.25468	14.9013
T015476	CAT79	0.2043	0.13	0.993917	13.124	31.7264
T068348	CAT1432	-0.1919	0.13	0.993917	14.1136	18.1539
T153365	KCNJ2-AS1	0.194	0.14	0.993917	14.5652	30.605
T231704	CAT2235.1	-0.2106	0.14	0.993917	11.5369	15.1768
T244128	CAT411	0.2152	0.14	0.993917	271.971	346.134
T112299	HNCAT174	0.185	0.14	0.993917	7.84715	11.6421
T352392	KCCAT102.1	0.2142	0.14	0.993917	1.53829	3.30862
T145123	OVAT141	-0.2204	0.14	0.993917	9.69882	18.7563
T079685	THCAT403	0.2154	0.14	0.993917	28.9591	41.0797
T262425	PRCAT142	-0.2254	0.14	0.993917	2.17273	7.80154
T080412	CAT1531	0.2041	0.14	0.993917	6.36827	20.0582
T307019	KCCAT206	-0.2235	0.14	0.993917	4.23224	7.62128
T261610	LINC00504	0.1858	0.14	0.993917	448.009	588.348
T037587	LSCAT107	-0.1937	0.14	0.993917	76.0551	116.756
T195372	THCAT359	-0.1964	0.14	0.993917	6.25378	8.24017
T260527	MPAT14	-0.1994	0.14	0.993917	495.502	696.58
T103984	KHCAT459	0.1798	0.14	0.993917	52.2668	95.5167
T155987	MEAT40	-0.2134	0.14	0.993917	7.86408	11.5349
T317387	PRCAT11.1	-0.201	0.14	0.993917	5.4227	54.9039
T254330	CAT470	-0.2131	0.14	0.993917	38.2883	69.1829
T152911	KCCAT156	-0.2188	0.14	0.993917	17.5727	28.6273
T197657	CAT299.1	0.1978	0.14	0.993917	6.38977	12.3156
T093344	KHCAT38	-0.2013	0.14	0.993917	6.45414	12.0792
T241024	THCAT559	-0.2146	0.14	0.993917	8.63896	16.6687
T104761	CAT1667	0.2023	0.14	0.993917	18.0623	29.889
T347696	BRCAT413	0.1999	0.14	0.993917	4.19889	11.242
T071781	CAT1458.1	0.1946	0.14	0.993917	15.387	22.4224
T328842	KCCAT440	-0.2113	0.14	0.993917	107.131	152.12
T326473	GBAT12	0.2222	0.14	0.993917	2.81846	4.96108
T360248	PRCAT207	0.2116	0.14	0.993917	8.44789	18.7582
T117131	KHCAT454	-0.2158	0.14	0.993917	5.93402	11.3302
T061231	KCCAT245	0.2037	0.14	0.993917	122.495	165.593
T032976	KHCAT326	-0.2202	0.14	0.993917	2.35774	3.79279
T220161	HICLINC381	-0.2276	0.14	0.993917	2.88727	6.84519
T021359	CAT115.2	0.1916	0.15	0.993917	6.7497	14.3431
T185669	KHCAT169.1	0.1814	0.15	0.993917	130.787	213.504
T086002	KPCAT49	-0.2074	0.15	0.993917	1.78118	3.68372
T168429	UTAT16	-0.2147	0.15	0.993917	21.468	27.1434
T363705	THCAT71	0.2047	0.15	0.993917	20.1126	33.1888
T119893	CAT1773	0.189	0.15	0.993917	60.9413	128.81
T002865	CAT16	-0.2138	0.15	0.993917	335.341	418.254
T212727	CAT2140	-0.2319	0.15	0.993917	3.03994	6.29031
T190139	CAT246	-0.2042	0.15	0.993917	77.1655	100.171
T237329	LMCD1-AS1.3	0.205	0.15	0.993917	3.14405	5.47273
T063065	CAT1388.1	-0.2159	0.15	0.993917	64.3111	105.672
T172564	MBAT58	-0.1948	0.15	0.993917	25.7095	53.5862
T175094	CAT2101.1	0.2005	0.15	0.993917	36.8992	83.2484
T043739	CAT1275	-0.1948	0.15	0.993917	5.95694	7.52637
T266617	CAT558.1	-0.2037	0.15	0.993917	140.989	214.921
T279992	ESAT22.3	-0.2041	0.15	0.993917	1.40307	2.4553
T052557	CAT1324	-0.2134	0.15	0.993917	45.0402	80.0949
T159916	AMAT157	-0.2051	0.15	0.993917	8.24318	11.1883
T023578	CAT126.2	-0.204	0.15	0.993917	18.0561	22.1932
T233674	KHCAT461	-0.2046	0.15	0.993917	31.578	45.6194
T153126	CAT1969.1	0.2018	0.15	0.993917	6.60018	15.7089
T380542	DDX26B-AS1	-0.202	0.15	0.993917	5.54879	9.78277
T158045	LINC00667.2	-0.1998	0.15	0.993917	164.692	265.422
T346481	KHCAT125	-0.2034	0.15	0.993917	57.8159	98.3887
T344274	CAT1046	0.1801	0.15	0.993917	51.3659	70.3921
T276732	CAT630.2	0.1802	0.15	0.993917	6.02086	18.5365
T009274	SLC2A1-AS1	0.1944	0.15	0.993917	22.2003	35.4597
T171884	KHCAT159	-0.2087	0.15	0.993917	45.7657	166.713
T175844	CAT2105	0.1856	0.15	0.993917	24.893	42.1666
T305646	MBAT93	-0.1985	0.15	0.993917	20.7871	29.7346
T219714	CAT2180.4	0.1991	0.15	0.993917	12.3858	29.2844
T056319	CAT1345.4	0.1926	0.15	0.993917	46.9603	65.0113
T220188	LSCAT27	-0.1986	0.15	0.993917	5.63328	9.47344
T123256	CAT1791.1	0.1753	0.15	0.993917	35.8251	59.2892
T100165	STCAT4	-0.2161	0.15	0.993917	5.25144	17.978
T094425	THCAT50.2	-0.2042	0.15	0.993917	3.10513	7.07872
T284251	LSCAT89	0.1763	0.15	0.993917	5.7286	12.7867
T047062	THCAT463	-0.1996	0.15	0.993917	7.11604	10.1618
T011929	CAT57.4	0.2114	0.15	0.993917	3.17978	5.41438
T107521	THCAT372.3	-0.2307	0.15	0.993917	4.47473	8.34031
T115221	KCCAT441	0.1841	0.16	0.993917	81.2439	120.686
T301681	PRCAT113	-0.1819	0.16	0.993917	7.50291	11.8861
T145024	CAT1923	0.1802	0.16	0.993917	8.41416	21.4382
T174314	LINC00665.4	-0.2	0.16	0.993917	24.6824	67.1986
T104538	KCCAT295	-0.2113	0.16	0.993917	48.3398	76.9547
T353731	FAM83H-AS1.2	0.1787	0.16	0.993917	186.153	241.464
T189064	CAT237.1	-0.1996	0.16	0.993917	9.27675	24.957
T036759	KCCAT509	-0.1996	0.16	0.993917	1.9507	6.41613
T083975	CAT1558	-0.191	0.16	0.993917	32.9485	53.1478
T177755	KCCAT193	-0.2103	0.16	0.993917	88.7096	123.827
T117821	CAT1760.2	0.1632	0.16	0.993917	248.117	467.555
T135594	OVAT112	0.1883	0.16	0.993917	6.79077	16.451
T152326	CAT1964.1	-0.1882	0.16	0.993917	15.4846	29.9406
T000305	THCAT96.2	0.2057	0.16	0.993917	9.77471	26.7547
T367468	THCAT308	0.1849	0.16	0.993917	6.03761	12.3067
T295065	AMAT3	0.1882	0.16	0.993917	47.3963	73.5524
T170487	CAT2078	-0.2198	0.16	0.993917	247.015	351.523
T309621	CAT846	-0.198	0.16	0.993917	39.1609	54.8461
T154290	LVCAT13	-0.1777	0.16	0.993917	89.5709	113.533
T104499	CAT1664	0.1864	0.16	0.993917	664.089	1018.24
T116064	CMAT29	0.2038	0.16	0.993917	5.88977	10.291
T151780	CAT1961.2	-0.1689	0.16	0.993917	20.1284	93.7359
T217002	KCCAT52	-0.2125	0.16	0.993917	5.83661	9.68254
T040184	KCCAT317	-0.2055	0.16	0.993917	6.81735	11.6208
T351405	CAT1100.2	0.179	0.16	0.993917	306.683	403.351
T016131	KCCAT131.1	0.185	0.16	0.993917	2.08251	5.4378
T353728	FAM83H-AS1.5	0.1884	0.16	0.993917	78.0479	121.06
T111765	KHCAT17	-0.2154	0.16	0.993917	27.6324	44.6026
T193457	LINC00152.4	0.188	0.16	0.993917	48.9929	83.492
T247056	OVAT121	-0.2123	0.16	0.993917	1.55282	3.38283
T178865	KCCAT391	-0.2074	0.16	0.993917	93.7599	144.518
T133492	CRAT4	0.1992	0.16	0.993917	20.6294	27.6358
T348983	CAT1079.3	0.1882	0.16	0.993917	5.09957	35.4039
T160541	CAT2010	-0.1992	0.16	0.993917	45.4095	77.8337
T264489	OCIAD1-AS1	-0.1805	0.16	0.993917	93.8857	130.721
T284702	CAT679.2	-0.1959	0.16	0.993917	62.611	99.3354
T358353	THCAT260	-0.202	0.16	0.993917	5.20874	26.5799
T358262	CAT1142	-0.1926	0.16	0.993917	158.937	199.322
T114556	BRCAT80	-0.2186	0.16	0.993917	2.97242	5.85121
T189930	HICLINC44.1	-0.1859	0.16	0.993917	5.66704	9.54804
T083666	HICLINC283.9	-0.1819	0.16	0.993917	18.0108	34.6009
T126397	HICLINC328	0.1881	0.16	0.993917	19.5143	27.2544
T148768	CAT1940	0.1879	0.17	0.993917	13.8893	18.8721
T126035	KCCAT71	0.174	0.17	0.993917	24.6121	35.3608
T235237	CAT2258.1	-0.1898	0.17	0.993917	16.949	24.2017
T242849	SEMA3B-AS1	-0.2156	0.17	0.993917	3.84582	10.2978
T153890	CAT1977	0.1873	0.17	0.993917	22.6383	40.9607
T040250	CAT1249	-0.1986	0.17	0.993917	121.57	179.767
T012546	CAT63.1	-0.1875	0.17	0.993917	17.9535	29.4102
T319605	CAT909.2	0.1772	0.17	0.993917	184.019	516.842
T123752	KCCAT345	-0.1843	0.17	0.993917	4.39124	7.14594
T144460	CAT1917.1	-0.1984	0.17	0.993917	296.293	896.488
T119156	ESAT113	0.1736	0.17	0.993917	113.999	163.034
T090928	CAT1584	-0.2083	0.17	0.993917	8.15918	13.1044
T268973	CAT577	0.1771	0.17	0.993917	652.566	854.389
T297706	HRAT9	-0.1943	0.17	0.993917	126.366	166.635
T205083	LACAT88	-0.1966	0.17	0.993917	2.96288	10.0045
T334243	CAT983.3	0.1832	0.17	0.993917	106.875	165.754
T203779	TTN-AS1.4	0.1869	0.17	0.993917	12.974	17.8939
T134013	MEAT102.2	-0.2195	0.17	0.993917	3.80793	7.15069
T032503	CAT182.2	-0.1896	0.17	0.993917	180.934	274.386
T086920	TBX5-AS1.2	0.178	0.17	0.993917	0.221579	6.42224
T114897	KHCAT105	0.1821	0.17	0.993917	16.1966	28.8977
T180058	THCAT567	-0.195	0.17	0.993917	10.1568	19.0301
T126997	CAT1814	0.1808	0.17	0.993917	132.196	176.921
T015715	CAT81.4	-0.1939	0.17	0.993917	13.1947	15.9063
T048147	CAT1300	0.1832	0.17	0.993917	101.659	182.111
T289914	KCCAT74	-0.1906	0.17	0.993917	42.9657	59.1469
T087684	DYNLL1-AS1	0.2045	0.17	0.993917	456.435	581.117
T091073	AMAT155	0.181	0.17	0.993917	2.35315	4.44191
T161592	CMAT46	0.1863	0.17	0.993917	2.39251	4.44903
T255144	MEAT98	0.1796	0.17	0.993917	6.08393	41.4406
T055911	NAV2-AS2.2	0.1884	0.17	0.993917	10.3373	20.4389
T241511	LIMD1-AS1.2	-0.178	0.17	0.993917	24.2345	33.609
T094828	CAT1617.2	-0.1934	0.17	0.993917	2.41632	4.61472
T152287	CAT1963	-0.168	0.17	0.993917	81.1895	115.278
T316296	THCAT336	0.1755	0.17	0.993917	25.905	38.9222
T135202	LSCAT282	-0.1937	0.18	0.993917	8.96483	34.4511
T254677	CAT472.1	0.1703	0.18	0.993917	7.18045	12.9332
T060449	CAT1367	0.179	0.18	0.993917	577.496	814.823
T346727	CAT1058.1	-0.179	0.18	0.993917	72.8727	112.709
T095092	LINC00458.1	0.1742	0.18	0.993917	11.5318	40.0402
T334335	JHDM1D-AS1	0.188	0.18	0.993917	237.222	468.024
T305330	LSCAT227	-0.193	0.18	0.993917	3.29647	22.832
T011515	CAT54.1	0.1874	0.18	0.993917	70.0145	142.672
T255259	CAT475.3	-0.201	0.18	0.993917	11.4119	30.052
T140017	LGAT2	0.1788	0.18	0.993917	8.88121	13.1774
T111748	CAT1709.2	0.1775	0.18	0.993917	5.08649	7.7284
T052162	KHCAT178	0.172	0.18	0.993917	90.1316	130.512
T048735	OVAT155	-0.1868	0.18	0.993917	4.85941	7.13317
T148268	OVAT62.2	0.182	0.18	0.993917	1.22266	2.99949
T011932	CAT57.2	0.1995	0.18	0.993917	24.0613	38.8434
T114445	CAT1723	0.1694	0.18	0.993917	1481.69	1912.47
T118143	KCCAT343	0.1785	0.18	0.993917	4.00004	5.60188
T072265	LVCAT45	-0.1763	0.18	0.993917	7.30775	8.7077
T347092	THCAT376	-0.1898	0.18	0.993917	5.80404	11.142
T285215	VCAN-AS1	0.1873	0.18	0.993917	185.786	319.961
T313282	UTAT25	0.1831	0.18	0.993917	2.3614	2.97167
T158027	LINC00526	-0.199	0.18	0.993917	56.6464	77.2278
T348881	CAT1078	0.171	0.18	0.993917	64.1169	127.269
T100203	STCAT7	-0.1893	0.18	0.993917	6.38305	20.6121
T290788	MEAT97	0.1691	0.18	0.993917	32.649	82.7631
T191271	PCBP1-AS1.3	-0.1931	0.18	0.993917	8.06728	11.5471
T008670	CAT37	-0.1862	0.18	0.993917	10.8495	25.2411
T376626	CAT2290	-0.1854	0.18	0.993917	2.50785	5.43543
T042675	CAT1266.2	0.1835	0.18	0.993917	10.257	20.2709
T068757	CAT1435	0.1965	0.18	0.993917	150.256	230.848
T320583	HOXA11-AS.3	-0.183	0.18	0.993917	83.2288	174.177
T317967	LVCAT6	0.1689	0.18	0.993917	462.159	685.296
T063018	SHANK2-AS2	-0.1959	0.18	0.993917	6.43004	11.593
T135320	KCCAT158	-0.1809	0.18	0.993917	3.0452	10.7061
T144646	CVAT13	0.1816	0.18	0.993917	248.49	314.475
T268788	LSCAT273	-0.1973	0.18	0.993917	3.44561	5.60763
T308315	MANEA-AS1	-0.1924	0.18	0.993917	14.2549	24.0721
T304063	CAT803	-0.2023	0.18	0.993917	38.2047	54.942
T369368	CAT1211	-0.195	0.18	0.993917	15.151	22.2526
T119151	BRCAT276	0.168	0.18	0.993917	28.6669	41.1462
T237720	AMAT68	-0.1968	0.18	0.993917	39.4728	61.1214
T353044	CAT1113.2	-0.1761	0.18	0.993917	20.5675	37.8471
T196789	CAT295.1	0.158	0.19	0.993917	43.1551	79.1411
T050475	CAT1317.1	-0.1904	0.19	0.993917	26.0566	31.0539
T350239	MEAT150	-0.1794	0.19	0.993917	5.05787	10.5456
T162025	KHCAT34.1	0.1706	0.19	0.993917	12.9472	19.9686
T171425	MEAT117	-0.1779	0.19	0.993917	98.7619	289.128
T256719	CAT490	-0.1874	0.19	0.993917	55.6532	97.1886
T023590	CAT128	-0.1622	0.19	0.993917	71.1969	123.031
T138508	CAT1887	-0.1897	0.19	0.993917	22.9768	32.529
T225510	CAT2206.2	0.1731	0.19	0.993917	17.273	39.8408
T378515	MBAT109	-0.1791	0.19	0.993917	180.383	233.907
T219721	CAT2179.1	0.1825	0.19	0.993917	5.21702	9.68393
T044194	CAT1277	0.1789	0.19	0.993917	22.9189	31.3953
T109935	CAT1699	0.1717	0.19	0.993917	13.1853	54.2728
T005327	HNCAT116	-0.1626	0.19	0.993917	20.1206	38.4199
T218271	OSER1-AS1.3	-0.1853	0.19	0.993917	95.3688	129.738
T268834	GBAT27	-0.1906	0.19	0.993917	40.7604	47.2629
T187446	OVAT28	-0.1777	0.19	0.993917	11.6234	15.4843
T038688	CAT1244	-0.1645	0.19	0.993917	6.67642	19.351
T036869	GATA3-AS1.3	-0.1742	0.19	0.993917	52.4721	131.814
T147504	CAT1933.2	0.1661	0.19	0.993917	22.5425	56.1039
T019309	LACAT30	-0.1886	0.19	0.993917	7.88792	21.9335
T023592	CAT129	-0.168	0.19	0.993917	233.062	374.004
T073832	CAT1472.2	-0.1658	0.19	0.993917	101.211	154.945
T071210	CAT1451.1	0.1747	0.19	0.993917	16.7958	34.0169
T083979	CAT1559.1	0.1764	0.19	0.993917	28.0502	71.6609
T205536	CAT352.1	0.1828	0.19	0.993917	5.12887	15.8276
T201907	CAT324	0.1756	0.19	0.993917	86.1224	149.349
T206471	CAT358.3	0.1868	0.19	0.993917	8.34176	118.252
T008728	CAT38	-0.1679	0.19	0.993917	9.96316	17.3057
T063059	CAT1387	-0.1836	0.19	0.993917	9.88915	16.2104
T250321	H1FX-AS1.2	-0.1866	0.19	0.993917	7.11927	23.6374
T108903	THCAT530	-0.1891	0.19	0.993917	8.86137	13.8748
T022373	CAT121.2	0.165	0.19	0.993917	13.1669	22.6565
T177590	CAT2114.2	0.1682	0.19	0.993917	66.0316	710.055
T353045	CAT1113.3	-0.17	0.19	0.993917	408.115	659.477
T233410	KCCAT420	-0.2004	0.19	0.993917	50.3452	94.6896
T167422	CAT2056	-0.1847	0.19	0.993917	93.0716	154.969
T306887	PRCAT179	0.1758	0.2	0.993917	11.8503	20.6285
T307687	CAT836	0.1655	0.2	0.993917	46.3393	64.2664
T275816	CAT623.1	0.16	0.2	0.993917	10.3784	28.4109
T057599	CAT1351	0.1613	0.2	0.993917	8.55403	13.9127
T364547	KHCAT138.1	0.1576	0.2	0.993917	18.8966	29.7835
T217484	CAT2166	0.183	0.2	0.993917	10.5696	28.8964
T243808	ESRG.1	0.1687	0.2	0.993917	131.557	729.503
T258261	LINC00885.1	-0.1669	0.2	0.993917	73.126	101.698
T029274	LSCAT255	0.161	0.2	0.993917	6.14077	12.9678
T011007	AMAT17	0.1669	0.2	0.993917	189.772	226.74
T225329	CAT2203.1	-0.1701	0.2	0.993917	51.4333	62.422
T313166	CAT878.3	0.1605	0.2	0.993917	132.33	164.271
T062911	ANO1-AS1	0.1695	0.2	0.993917	229.602	688.23
T127444	THCAT538	-0.1865	0.2	0.993917	12.1558	17.3118
T153691	AMAT116	-0.1799	0.2	0.993917	10.4407	15.0368
T006614	SNHG12.3	-0.18	0.2	0.993917	203.807	246.029
T277460	CAT634.1	-0.1756	0.2	0.993917	9.16453	24.9588
T120415	CAT1775.1	0.1832	0.2	0.993917	3.09962	16.5656
T295749	HNCAT48	0.1755	0.2	0.993917	16.2978	41.87
T103126	CAT1655	-0.1763	0.2	0.993917	28.0772	66.9282
T165871	UTAT21	-0.1967	0.2	0.993917	27.0787	39.8354
T130003	KPCAT16	0.1763	0.2	0.993917	53.0931	88.4867
T167577	KHCAT287	-0.1743	0.2	0.993917	104.594	174.23
T072402	CAT1464	0.1642	0.2	0.993917	87.5626	319.897
T348489	LSCAT109	-0.1751	0.2	0.993917	50.8388	472.098
T347941	CAT1065.2	-0.1943	0.2	0.993917	118.7	163.02
T375351	CAT2284	-0.1696	0.2	0.993917	35.6256	49.8944
T174016	MBAT94	-0.1924	0.2	0.993917	60.4569	78.1259
T030339	CAT162.2	0.1533	0.2	0.993917	793.991	1109.5
T313639	CAT880	0.1713	0.2	0.993917	106.044	148.035
T044397	OVAT144	-0.187	0.2	0.993917	2.36021	6.18833
T140924	CAT1897	0.1771	0.2	0.993917	34.0252	63.2961
T312843	BRCAT422	0.1681	0.2	0.993917	17.3332	24.9104
T014947	CAT76.1	-0.17	0.2	0.993917	26.9445	46.354
T074277	LACAT158	0.179	0.2	0.993917	6.99026	9.38938
T344048	CAT1041.2	0.1745	0.2	0.993917	0.106032	0.351992
T367521	CAT1205.3	0.1806	0.2	0.993917	250.178	342.903
T189076	PNAT96	-0.1795	0.2	0.993917	10.4004	15.69
T114875	CAT1729.4	-0.191	0.2	0.993917	31.2172	56.6
T056318	CAT1345.3	0.1866	0.2	0.993917	87.3836	111.668
T231721	KCCAT439	-0.1825	0.2	0.993917	3.15154	5.71354
T335717	CAT994	0.1725	0.2	0.993917	14.5536	20.4356
T380707	HRAT6	-0.1893	0.2	0.993917	58.685	78.5563
T067679	KCCAT27.1	0.177	0.2	0.993917	1.90576	6.73002
T092656	THCAT250.2	0.1703	0.2	0.993917	2.11591	3.91685
T305296	THCAT605	-0.168	0.2	0.993917	3.00389	4.81117
T325788	PNAT128	-0.1895	0.2	0.993917	216.541	314.948
T290421	HICLINC142.1	0.173	0.2	0.993917	5.31217	17.7136
T114379	CAT1721	0.1739	0.21	0.993917	9.51356	17.0862
T230701	KCCAT370	-0.1817	0.21	0.993917	26.4178	38.0547
T227657	CAT2217.2	-0.1802	0.21	0.993917	39.8689	79.5144
T226842	KCCAT272	0.1782	0.21	0.993917	10.2045	20.8992
T030861	CAT167.1	-0.1663	0.21	0.993917	6.85909	13.6273
T302636	MPAT5	0.1587	0.21	0.993917	142.318	269.178
T159555	CMAT26	-0.1642	0.21	0.993917	8.41446	11.2556
T064270	CAT1400	-0.165	0.21	0.993917	104.671	156.104
T266820	CAT565	-0.1905	0.21	0.993917	245.695	422.334
T036018	LINC00702.1	0.1711	0.21	0.993917	11.7371	23.8344
T244793	CAT419	0.1744	0.21	0.993917	4.46466	10.8827
T105835	CAT1679	0.1547	0.21	0.993917	34.0147	50.1425
T249724	CAT443	-0.1882	0.21	0.993917	9.92724	41.2025
T180242	MBAT100	0.172	0.21	0.993917	398.66	523.014
T066414	CAT1417	0.1705	0.21	0.993917	608.529	836.772
T063682	CAT1391	0.1656	0.21	0.993917	32.801	44.4919
T007865	ZMYM4-AS1	0.1589	0.21	0.993917	21.0987	28.7156
T040502	LINC00839.1	-0.1641	0.21	0.993917	77.4988	172.806
T133095	KCCAT244	-0.1776	0.21	0.993917	5.69314	13.708
T009268	LSCAT41	0.1796	0.21	0.993917	9.13039	33.7225
T126429	LGAT114	0.172	0.21	0.993917	14.0498	21.9836
T077317	CAT1500	-0.1734	0.21	0.993917	136.138	211.018
T187346	AMAT140	0.1694	0.21	0.993917	20.2934	31.3319
T213936	CAT2144.2	0.1648	0.21	0.993917	5.81466	9.27022
T015056	MBAT91.2	-0.1801	0.21	0.993917	13.2361	40.7646
T127635	CAT1820.4	0.1723	0.21	0.993917	3.69128	11.4441
T315258	KCCAT240.3	-0.1704	0.21	0.993917	14.0194	27.9103
T129768	CAT1840.1	0.1763	0.21	0.993917	18.0015	47.6458
T130235	CAT1845.3	0.1797	0.21	0.993917	24.5691	36.2439
T247017	LACAT229	-0.1751	0.21	0.993917	25.5275	33.4118
T071783	CAT1458.2	0.1759	0.21	0.993917	6.28502	15.0933
T118066	KCCAT581	0.1732	0.21	0.993917	10.0373	13.1028
T255834	CAT479	-0.179	0.21	0.993917	35.7107	60.5995
T322579	LINC00957	0.1578	0.21	0.993917	138.941	236.751
T312225	KCCAT178.1	0.1855	0.21	0.993917	5.8797	16.6809
T203065	MLK7-AS1	0.1815	0.21	0.993917	33.4998	69.5348
T029622	MIR205HG.10	0.1751	0.21	0.993917	146.491	405.33
T267813	CAT572.6	-0.1771	0.21	0.993917	17.2665	35.5862
T360105	AMAT73	0.1727	0.21	0.993917	34.4751	49.3894
T003422	CAT18.2	0.1762	0.21	0.993917	4.37336	7.23339
T371236	THCAT228	0.1622	0.22	0.993917	36.2787	56.0193
T082674	CAT1549.1	0.1579	0.22	0.993917	235.625	546.453
T350782	RNF139-AS1.2	-0.1802	0.22	0.993917	75.4501	99.3027
T093641	CAT1604.1	0.1714	0.22	0.993917	6.92263	14.9081
T141985	CAT1907	0.155	0.22	0.993917	8.36068	17.8558
T179951	KCCAT316	0.1711	0.22	0.993917	5.06896	11.8062
T239000	SGOL1-AS1	-0.1619	0.22	0.993917	28.8935	38.6492
T334373	PRCAT159	-0.1685	0.22	0.993917	12.609	18.1874
T031097	CAT172	-0.1816	0.22	0.993917	50.9706	66.242
T051794	HNCAT212.3	0.155	0.22	0.993917	4.1158	24.2575
T039115	ESAT116.1	-0.1735	0.22	0.993917	178.228	253.925
T337258	AMAT27	0.164	0.22	0.993917	30.46	50.2078
T066986	PRCAT220	-0.1914	0.22	0.993917	5.72685	9.40734
T325833	OVAT120	-0.1753	0.22	0.993917	5.88677	9.34499
T248567	MBAT60	-0.1586	0.22	0.993917	10.1713	17.9332
T335044	KPCAT8	-0.1741	0.22	0.993917	2.50026	4.38394
T268813	KCCAT349	-0.1674	0.22	0.993917	24.4818	39.0908
T245057	FOXP1-AS1.1	0.1715	0.22	0.993917	5.49439	7.34423
T102914	CAT1652.2	0.1651	0.22	0.993917	102.478	171.246
T246330	CAT427	0.155	0.22	0.993917	3.20175	7.29191
T255253	CAT475.6	-0.169	0.22	0.993917	25.9448	38.0511
T083057	KHCAT20	-0.173	0.22	0.993917	2.26245	6.35567
T150923	CAT1954.1	0.1749	0.22	0.993917	8.56513	17.739
T334324	KCCAT200	0.1676	0.22	0.993917	5.04779	11.2916
T242797	MEAT124	-0.1801	0.22	0.993917	17.8012	35.4199
T320580	HOXA11-AS.2	0.1627	0.22	0.993917	27.0874	93.5488
T193829	KCCAT347	-0.1712	0.22	0.993917	61.6922	95.1806
T093420	KHCAT335	-0.1551	0.22	0.993917	8.97138	12.3679
T054837	ZBED5-AS1.2	-0.18	0.22	0.993917	42.1668	65.6308
T252993	PLCH1-AS1	-0.1797	0.22	0.993917	2.12609	7.07212
T138056	CAT1884.3	0.1734	0.22	0.993917	14.1925	40.532
T152410	THCAT157	-0.1588	0.22	0.993917	64.6492	81.8608
T326472	GBAT6	0.1734	0.22	0.993917	2.97106	4.86591
T351183	CAT1098.2	0.1565	0.22	0.993917	4.28109	37.5227
T379060	CAT2306	0.174	0.22	0.993917	10.2569	17.4092
T263223	LACAT102	-0.1779	0.22	0.993917	45.5107	130.831
T153645	LINC00511.8	0.17	0.22	0.993917	24.1578	45.9048
T272008	OVAT49	-0.1672	0.23	0.993917	20.6826	35.25
T074098	CAT1473.3	-0.1713	0.23	0.993917	1233.52	1557.85
T082671	CAT1549.2	0.1588	0.23	0.993917	50.7595	105.181
T081839	AMAT133	-0.1733	0.23	0.993917	4.01887	9.30347
T064965	RAB30-AS1	-0.179	0.23	0.993917	126.574	182.88
T116384	CAT1742	-0.1774	0.23	0.993917	4.53702	6.74581
T352540	THCAT151	-0.1832	0.23	0.993917	33.0466	46.0027
T322051	LINC00265.1	-0.1749	0.23	0.993917	9.85477	70.5803
T078693	KHCAT452	-0.1489	0.23	0.993917	5.66248	13.2219
T186725	CAT219.2	0.1583	0.23	0.993917	391.497	803.819
T117477	CAT1756.1	-0.1668	0.23	0.993917	17.671	22.4638
T153012	LACAT7.1	-0.1675	0.23	0.993917	11.403	18.3913
T281940	HNCAT11	0.1582	0.23	0.993917	6.53084	10.9771
T360020	CAT1151	0.1575	0.23	0.993917	45.2525	67.3412
T078886	CAT1520.2	-0.1736	0.23	0.993917	323.448	495.81
T361647	CAT1160	0.1694	0.23	0.993917	112.943	269.505
T239205	MBAT70	-0.165	0.23	0.993917	375.411	510.899
T173161	CAT2094.1	0.1525	0.23	0.993917	33.9824	94.8294
T371308	THCAT489	-0.1776	0.23	0.993917	1.64991	2.55464
T191277	CAT261	-0.1733	0.23	0.993917	18.2351	30.0469
T164479	CAT2033	0.1554	0.23	0.993917	21.9139	35.78
T089589	CAT1581	0.154	0.23	0.993917	6.4739	13.9858
T258476	MFI2-AS1.2	-0.1631	0.23	0.993917	28.2882	51.7643
T160532	CAT2009.1	0.1732	0.23	0.993917	14.3435	25.8559
T137479	CAT1882	-0.1639	0.23	0.993917	88.3281	146.094
T232428	AMAT126	-0.1684	0.23	0.993917	2.87994	4.27997
T351984	CAT1104.1	0.1616	0.23	0.993917	56.0635	183.856
T353052	BRCAT430	-0.1674	0.23	0.993917	36.0409	84.189
T174327	LINC00665.8	-0.169	0.23	0.993917	345.032	466.426
T167574	RAB11B-AS1.2	-0.1635	0.23	0.993917	7.73557	12.8264
T050158	KCCAT334	-0.1713	0.23	0.993917	8.43254	13.5507
T104760	KHCAT89	0.1675	0.23	0.993917	4.92609	7.54863
T334294	CAT985	0.1652	0.23	0.993917	12.1823	28.2792
T151756	CAT1959	-0.1728	0.23	0.993917	2.52649	3.19461
T367410	CAT1204.5	0.1641	0.23	0.993917	132.93	214.669
T105107	CAT1670	0.1644	0.23	0.993917	3.24899	6.98138
T135921	HNCAT49	-0.169	0.23	0.993917	8.27522	18.1128
T305255	OVAT19	-0.168	0.23	0.993917	120.958	424.425
T076274	DDX11-AS1.3	-0.1604	0.23	0.993917	18.3381	28.675
T036870	GATA3-AS1.6	-0.1633	0.23	0.993917	59.1699	182.154
T262495	AMAT130	-0.1569	0.23	0.993917	6.79735	10.0923
T192060	KHCAT386	0.1579	0.23	0.993917	32.6793	47.3018
T146120	HICLINC339	-0.1682	0.23	0.993917	19.5077	32.5977
T250117	KHCAT78	-0.1596	0.24	0.993917	67.2842	253.878
T102504	CAT1649	0.1514	0.24	0.993917	69.3779	85.7191
T321643	CAT925	0.1522	0.24	0.993917	23.4847	38.2048
T339244	CAT1007.2	-0.1546	0.24	0.993917	83.923	121.41
T359517	CRAT51	-0.1791	0.24	0.993917	84.7699	123.641
T266800	CAT564	-0.167	0.24	0.993917	2.1374	4.5497
T114261	DPH6-AS1	0.157	0.24	0.993917	3.94729	9.16755
T148194	THCAT616	0.1471	0.24	0.993917	33.6715	54.047
T127197	LACAT201	0.1679	0.24	0.993917	14.4279	36.7777
T347826	LINC00535.1	-0.1623	0.24	0.993917	1.99469	5.64181
T088006	CAT1577.1	0.1418	0.24	0.993917	597.889	831.024
T178870	CAT2122	-0.159	0.24	0.993917	76.6311	113.275
T300927	CAT786	-0.153	0.24	0.993917	7.0543	10.3143
T261493	KHCAT267	-0.1737	0.24	0.993917	96.361	135.706
T266960	CAT566.1	0.161	0.24	0.993917	28.1994	54.9356
T363031	CAT1168.3	-0.1783	0.24	0.993917	2.62317	5.75712
T255789	KHCAT302	0.1445	0.24	0.993917	15.8755	32.0362
T182390	UTAT8.2	-0.1726	0.24	0.993917	7.13396	9.88533
T333828	KHCAT457	0.151	0.24	0.993917	20.8613	27.7547
T199926	AMAT53	-0.1392	0.24	0.993917	7.40499	9.99463
T107429	KCCAT179	0.167	0.24	0.993917	2.69434	7.82644
T099619	KCCAT490	-0.1635	0.24	0.993917	5.77207	10.6914
T291162	GRPEL2-AS1	0.1553	0.24	0.993917	9.15038	14.3289
T304490	PRCAT258	-0.1707	0.24	0.993917	0.26682	3.53882
T017591	KCCAT16.1	0.147	0.24	0.993917	24.3705	63.5396
T291896	THCAT212	0.1602	0.24	0.993917	18.5493	28.2714
T201450	CAT320.2	-0.149	0.24	0.993917	15.3772	23.5446
T005060	THCAT138	-0.1739	0.24	0.993917	4.28533	6.35194
T199854	THCAT72	-0.1807	0.24	0.993917	4.65771	8.6259
T309673	TRAF3IP2-AS1.2	0.1573	0.24	0.993917	3.69986	14.4847
T059852	CAT1362.3	0.1609	0.24	0.993917	28.9389	47.8025
T355292	LACAT12	-0.1569	0.25	0.993917	21.1056	34.0588
T129677	AMAT131	-0.1678	0.25	0.993917	4.11173	7.24397
T311397	CAT862.2	0.144	0.25	0.993917	13.8244	67.8326
T201564	CCDC148-AS1	-0.1591	0.25	0.993917	3.08281	5.12095
T353735	CAT1119	0.1646	0.25	0.993917	20.3579	31.2807
T149419	CAT1944	0.1598	0.25	0.993917	386.891	519.858
T019192	THCAT320	-0.1655	0.25	0.993917	56.1671	87.935
T256889	KCCAT615	0.1531	0.25	0.993917	4.09675	16.9844
T150288	CAT1950.1	0.1607	0.25	0.993917	4.01364	5.71388
T159101	UTAT6	-0.1601	0.25	0.993917	28.5059	37.8148
T048717	KCCAT475	-0.1645	0.25	0.993917	73.1264	158.133
T214684	ESAT110.3	0.1407	0.25	0.993917	114.041	153.451
T380073	PRCAT110	0.1469	0.25	0.993917	5.79816	9.98243
T193003	CAT267	0.1654	0.25	0.993917	5.87126	9.48617
T163181	AMAT123	0.1587	0.25	0.993917	26.8565	42.0543
T188803	THCAT311	-0.1684	0.25	0.993917	10.9605	14.1826
T245054	CAT422	0.171	0.25	0.993917	17.8188	22.7751
T354382	HNCAT161	-0.1748	0.25	0.993917	82.2473	121.131
T343001	KCCAT583	-0.1637	0.25	0.993917	53.5869	75.499
T133789	ESAT4	0.1482	0.25	0.993917	23.0678	79.1894
T207212	CAT366.3	0.1751	0.25	0.993917	74.0073	247.457
T365063	CAT1184.1	0.1543	0.25	0.993917	91.6809	138.897
T043181	OVAT72	-0.1579	0.25	0.993917	21.6404	33.1687
T356437	MIR31HG.2	0.153	0.25	0.993917	66.1516	158.874
T127042	MPAT2	0.1591	0.25	0.993917	1725.54	2181.46
T054279	CAT1335	0.1508	0.25	0.993917	11.7431	19.2346
T171377	CAT2084.2	-0.1628	0.25	0.993917	119.36	362.044
T332760	KCCAT6	-0.1509	0.25	0.993917	46.1754	110.558
T148186	MBAT3	0.1545	0.25	0.993917	64.9878	118.514
T234486	AMAT20	-0.1595	0.25	0.993917	25.1195	35.6397
T302546	CAT797	0.16	0.25	0.993917	30.3512	41.972
T125742	CAT1810.1	0.1525	0.25	0.993917	30.2602	105.997
T108056	CAT1694.1	-0.1642	0.25	0.993917	3.26688	8.07073
T032159	HRAT15	0.1424	0.25	0.993917	40.1856	52.7177
T364851	CAT1182	0.16	0.25	0.993917	26.2097	35.8454
T144961	CAT1922.2	-0.1687	0.25	0.993917	20.0411	32.5231
T313035	CAT877	0.1549	0.25	0.993917	26.8207	52.1693
T313012	CAT876	0.1512	0.25	0.993917	20.7793	42.1117
T290017	HICLINC140.1	-0.1613	0.25	0.993917	243.73	313.809
T289937	HICLINC139	0.148	0.25	0.993917	19.7131	32.8392
T240984	CAT400.1	0.1564	0.26	0.993917	50.6021	69.0243
T055152	BRCAT314	-0.152	0.26	0.993917	11.8183	18.4672
T017712	CAT92	0.1515	0.26	0.993917	13.91	19.2041
T170471	KCCAT173	-0.1576	0.26	0.993917	55.1904	82.135
T287543	CAT701.2	0.1492	0.26	0.993917	4.78281	7.91693
T174317	LINC00665.1	0.1663	0.26	0.993917	68.8668	107.53
T041730	CAT1259.1	0.1486	0.26	0.993917	119.603	207.362
T354679	CAT1125.1	-0.1657	0.26	0.993917	8.23555	18.2666
T332019	LACAT119	-0.1596	0.26	0.993917	11.9649	29.7641
T121985	CAT1784	0.1385	0.26	0.993917	103.56	151.58
T327269	CAT946.1	-0.154	0.26	0.993917	78.9222	105.688
T291543	CAT733.1	0.1387	0.26	0.993917	5.24092	11.6562
T247556	LINC00883.1	0.1519	0.26	0.993917	16.9471	28.7161
T339382	CAT1008	0.1631	0.26	0.993917	2.81086	5.75367
T316763	KCCAT690	0.1659	0.26	0.993917	2.01941	4.44668
T006618	SNHG12.1	-0.1604	0.26	0.993917	30.1233	48.0154
T105463	CAT1674	0.1534	0.26	0.993917	1.75311	5.47925
T200157	MPAT6	-0.1559	0.26	0.993917	9.26411	11.6343
T258634	CAT503	-0.1549	0.26	0.993917	60.1546	94.2808
T248116	CAT431.1	-0.1602	0.26	0.993917	4.87401	17.4497
T202907	CAT326	-0.1706	0.26	0.993917	114.178	139.741
T130021	CAT1843	-0.1625	0.26	0.993917	220.886	358.087
T012213	OVAT170	-0.1694	0.26	0.993917	7.01179	13.6892
T092588	KCCAT432	-0.1476	0.26	0.993917	12.5495	26.2939
T029618	MIR205HG.5	0.1617	0.26	0.993917	92.3184	252.747
T038056	MBAT92	0.1516	0.26	0.993917	199.08	296.687
T293354	CAT744.2	0.1402	0.26	0.993917	88.7902	135.887
T285803	LUCAT1.2	0.154	0.26	0.993917	5.45663	11.0296
T093207	CAT1599	0.1468	0.26	0.993917	8.24299	15.0159
T219632	UTAT23	0.1628	0.26	0.993917	11.9257	16.4535
T232422	OVAT57	-0.1559	0.26	0.993917	13.7391	18.0555
T375463	CAT2285	0.1529	0.26	0.993917	62.366	101.664
T127301	KHCAT82	0.1508	0.26	0.993917	122.326	169.481
T267701	KCCAT44	0.1387	0.26	0.993917	14.676	61.5058
T382250	KCCAT98	-0.158	0.26	0.993917	27.6299	49.426
T048986	LSCAT97	-0.1527	0.26	0.993917	11.0122	25.9881
T236260	THCAT429	-0.1611	0.26	0.993917	34.1251	53.4576
T117069	CAT1749	-0.1541	0.26	0.993917	30.48	93.8829
T018603	CAT99.3	0.1558	0.26	0.993917	70.0506	99.8388
T009267	LSCAT124	0.162	0.26	0.993917	10.182	44.5795
T011500	GBAT38	0.1641	0.26	0.993917	27.7121	53.5047
T158332	CAT1998	0.16	0.26	0.993917	38.861	49.5218
T314883	CAHM	-0.164	0.26	0.993917	8.9658	13.0375
T116773	CAT1745.1	0.1615	0.26	0.993917	3.70081	24.5199
T169754	OVAT50	-0.1462	0.26	0.993917	13.2667	19.3472
T167158	KCCAT164	0.1566	0.26	0.993917	2.45635	5.53109
T319148	CAT907.10	-0.1675	0.26	0.993917	40.2065	104.67
T380237	RAP2C-AS1	0.1501	0.26	0.993917	70.1393	97.0091
T205747	CAT353.1	-0.1467	0.27	0.993917	4.6636	7.13143
T080164	CRAT16	0.1616	0.27	0.993917	105.875	140.096
T165464	CAT2042	0.1493	0.27	0.993917	1579.94	1863.5
T070283	CAT1443	-0.147	0.27	0.993917	27.6463	37.956
T219640	PRCAT222	-0.1539	0.27	0.993917	3.87452	8.89906
T101483	CAT1645	-0.1533	0.27	0.993917	5.74325	81.9744
T185497	THCAT173	-0.17	0.27	0.993917	11.0051	38.8231
T289144	BRCAT124	0.161	0.27	0.993917	5.14668	7.26459
T146596	AMAT106	-0.1515	0.27	0.993917	15.1468	20.7398
T320414	CAT915.2	0.1561	0.27	0.993917	4.46345	15.0197
T006619	SNHG12.2	-0.1674	0.27	0.993917	97.6646	124.31
T271074	CAT583	0.1347	0.27	0.993917	33.367	82.5968
T045544	CAT1285.1	-0.1441	0.27	0.993917	113.693	136.215
T118681	HNCAT175	0.156	0.27	0.993917	8.48486	11.7272
T219729	CAT2181	0.1583	0.27	0.993917	42.7617	65.0614
T017040	MBAT23	0.1417	0.27	0.993917	227.498	279.54
T065358	KHCAT116	0.1461	0.27	0.993917	8.42342	11.864
T024433	CAT132	-0.163	0.27	0.993917	18.1807	96.1656
T124124	AMAT65	0.15	0.27	0.993917	13.5237	18.3325
T064507	KCCAT556	-0.149	0.27	0.993917	14.6401	25.4776
T208670	CAT370	-0.1554	0.27	0.993917	25.5312	37.6879
T363034	CAT1168.2	-0.1503	0.27	0.993917	30.6571	42.724
T290495	LSCAT278.1	-0.1524	0.27	0.993917	6.93645	11.2647
T281790	CAT656.2	0.1589	0.27	0.993917	10.9248	16.9491
T298876	CAT779	0.1513	0.27	0.993917	3.79018	9.06858
T159191	KCCAT361	0.1555	0.27	0.993917	5.71085	8.8065
T127290	AMAT10	0.1385	0.27	0.993917	57.6696	83.246
T348703	CAT1073.1	-0.1456	0.27	0.993917	56.6699	174.794
T345055	CAT1051.3	0.1466	0.27	0.993917	77.9346	155.906
T295922	CAT759.1	-0.1697	0.27	0.993917	2.01797	4.16318
T282175	CAT661.2	0.1439	0.27	0.993917	52.9126	91.5313
T196520	SH3RF3-AS1	0.1495	0.27	0.993917	12.2668	22.2779
T073331	A2M-AS1.3	-0.1558	0.27	0.993917	6.27201	9.95804
T069806	CAT1439	0.1463	0.27	0.993917	18.4449	40.9578
T275639	KHCAT184	0.146	0.27	0.993917	135.504	223.623
T173152	CAT2094.2	0.142	0.27	0.993917	36.8303	124.307
T240628	ENTPD3-AS1.1	-0.149	0.27	0.993917	21.5404	34.1379
T129132	CAT1830	-0.1739	0.27	0.993917	37.2696	57.9884
T225755	HNCAT41.2	-0.144	0.27	0.993917	14.7306	25.0868
T037129	AMAT142	0.145	0.27	0.993917	2.94929	6.6401
T106738	CAT1684.3	-0.149	0.27	0.993917	42.9434	94.2375
T259774	NOP14-AS1.1	0.1445	0.27	0.993917	396.17	581.408
T162081	CAT2017	0.1529	0.27	0.993917	17.7553	28.793
T164487	AMAT75	0.145	0.27	0.993917	11.5434	19.2101
T252688	MBNL1-AS1.1	0.1309	0.28	0.993917	31.5518	81.9079
T345416	OVAT34	-0.1547	0.28	0.993917	8.25653	12.4774
T043563	UNC5B-AS1.1	-0.1346	0.28	0.993917	4.58706	11.5614
T184453	CAT211.1	-0.1465	0.28	0.993917	10.3639	14.6502
T142346	CAT1908	0.1408	0.28	0.993917	116.917	167.682
T027958	CAT151.1	0.1554	0.28	0.993917	40.0484	72.1855
T232812	KHCAT21.2	0.1463	0.28	0.993917	33.0322	48.3771
T228930	LACAT91	-0.1502	0.28	0.993917	36.1578	48.3505
T130354	THCAT426	-0.1425	0.28	0.993917	55.4192	78.2259
T252253	WWTR1-AS1.1	0.1499	0.28	0.993917	25.4413	39.8954
T014669	PRCAT34	-0.1456	0.28	0.993917	7.3181	11.1529
T151540	LACAT210	-0.1516	0.28	0.993917	28.1175	34.2317
T103907	KCCAT707	-0.1573	0.28	0.993917	2.03882	3.3843
T320888	BRCAT372	0.1223	0.28	0.993917	32.5978	53.1491
T372212	EIF1AX-AS1	0.1339	0.28	0.993917	4.28816	7.30383
T228294	MCM3AP-AS1.1	-0.1402	0.28	0.993917	17.1906	23.6954
T254538	LSCAT64	0.1449	0.28	0.993917	7.00631	11.1497
T038395	CAT1240.2	-0.1375	0.28	0.993917	4.41345	9.91746
T158961	CAT2002	0.1431	0.28	0.993917	3.20912	21.7745
T010406	CAT45	0.1693	0.28	0.993917	10.5267	77.8301
T264727	KPCAT75	-0.155	0.28	0.993917	1.87941	2.81354
T129960	CAT1842.2	0.1391	0.28	0.993917	195.956	275.364
T174480	CAT2098	0.1488	0.28	0.993917	7.91327	12.9733
T034491	CAT194.2	-0.1567	0.28	0.993917	23.1094	52.1646
T036867	GATA3-AS1.5	-0.1524	0.28	0.993917	25.1862	97.8984
T225451	STCAT11	-0.144	0.28	0.993917	5.66546	8.53375
T202343	PRCAT52	-0.1547	0.28	0.993917	19.0775	25.387
T252691	LACAT175	-0.1512	0.28	0.993917	7.38311	12.721
T029621	MIR205HG.7	0.1443	0.28	0.993917	532.14	1111.91
T041156	CAT1256	-0.1531	0.28	0.993917	14.8426	20.0311
T365048	CAT1183	0.1449	0.28	0.993917	20.1767	36.0602
T050460	CAT1316	-0.1444	0.28	0.993917	6.98515	13.7819
T368418	HNCAT22	-0.1666	0.28	0.993917	11.4415	32.3875
T126062	BRCAT259.1	-0.1493	0.28	0.993917	15.4055	28.0836
T056840	CSTF3-AS1	-0.1496	0.28	0.993917	4.69253	5.9694
T052945	CAT1326	0.1497	0.28	0.993917	2.96861	6.15559
T374160	KCCAT468	-0.1632	0.28	0.993917	76.7785	108.712
T327271	CAT946.2	-0.1462	0.28	0.993917	87.4003	115.163
T272801	CAT591	0.141	0.28	0.993917	21.885	59.9951
T346129	LSCAT10.2	-0.1476	0.28	0.993917	5.60838	21.4071
T265000	KCCAT590	-0.1614	0.28	0.993917	64.1534	98.419
T326436	CAT945.1	0.1358	0.28	0.993917	11.8541	17.5478
T036343	CALML3-AS1.5	0.1463	0.28	0.993917	71.493	3929.16
T251112	IL20RB-AS1	0.133	0.28	0.993917	16.7896	81.5866
T335016	OR2A1-AS1.2	-0.159	0.28	0.993917	5.11394	8.78094
T348497	KCCAT219	-0.1544	0.28	0.993917	143.227	249.464
T128926	KHCAT398	-0.1519	0.28	0.993917	26.7815	136.601
T357646	KCCAT506.1	-0.1514	0.28	0.993917	14.969	31.4757
T291191	MIR143HG.1	0.143	0.29	0.993917	15.3345	33.4505
T131417	OVAT255	-0.1429	0.29	0.993917	10.3916	22.2579
T303449	CAT800.1	-0.1429	0.29	0.993917	5.21643	10.3367
T363042	CAT1168.1	-0.1356	0.29	0.993917	24.1706	37.0141
T281892	CAT659	-0.1532	0.29	0.993917	15.8148	56.303
T117823	CAT1760.1	0.1389	0.29	0.993917	456.354	770.366
T263711	UGDH-AS1.3	0.1318	0.29	0.993917	715.789	915.673
T304783	CAT810.1	-0.1546	0.29	0.993917	1.40583	2.73
T316996	KHCAT463	0.1433	0.29	0.993917	7.02546	12.66
T201449	CAT320.1	-0.1374	0.29	0.993917	31.7937	43.9692
T168088	KCCAT138	0.1507	0.29	0.993917	5.36402	10.1741
T043237	CAT1270	0.1495	0.29	0.993917	5.24968	8.9644
T302913	OVAT152	-0.1624	0.29	0.993917	65.8335	95.1897
T215474	CAT2152.2	-0.1606	0.29	0.993917	37.0906	79.6251
T011677	LVCAT38	-0.149	0.29	0.993917	16.7418	35.338
T293351	CAT744.1	0.1371	0.29	0.993917	7.04943	11.1538
T160599	CMAT55	0.1498	0.29	0.993917	76.5439	116.28
T171842	CAT2090	-0.1438	0.29	0.993917	11.8717	42.359
T208524	THCAT416	0.1467	0.29	0.993917	12.7824	40.0045
T036164	THCAT472	-0.1431	0.29	0.993917	13.0473	22.2277
T118567	KCCAT542	0.139	0.29	0.993917	45.7869	67.4253
T064086	CAT1398	-0.1524	0.29	0.993917	11.2969	25.5016
T177234	CAT2112	-0.1515	0.29	0.993917	23.1744	34.2133
T328656	AMAT174	-0.15	0.29	0.993917	3.35699	4.55839
T058040	LRP4-AS1.2	-0.142	0.29	0.993917	1.90698	3.60135
T297731	CAT771	0.1381	0.29	0.993917	157.727	238.126
T009064	HICLINC8	0.1404	0.29	0.993917	9.04974	29.072
T359449	CMAT24	-0.1448	0.3	0.993917	31.4674	46.607
T123737	KCCAT209	-0.154	0.3	0.993917	117.014	150.776
T307913	CAT839	-0.1429	0.3	0.993917	44.1401	60.8465
T313640	CAT881	0.136	0.3	0.993917	50.1937	76.8505
T139479	CAT1891.1	-0.1528	0.3	0.993917	2.3471	3.78651
T315265	KCCAT240.1	-0.1384	0.3	0.993917	23.4787	35.683
T003311	THCAT66	0.1424	0.3	0.993917	10.6974	46.2688
T152908	KCCAT144	-0.1506	0.3	0.993917	7.85162	12.832
T181485	CAT2133.1	-0.1504	0.3	0.993917	27.8107	48.8287
T139598	CAT1893	0.137	0.3	0.993917	163.483	215.029
T104777	OVAT132	-0.1509	0.3	0.993917	8.89294	12.7341
T261843	TAPT1-AS1	-0.1422	0.3	0.993917	28.2292	58.104
T039532	CAT1247	-0.1383	0.3	0.993917	40.6929	51.3128
T119149	AMAT177	0.159	0.3	0.993917	2.18651	2.91234
T367406	CAT1204.4	0.136	0.3	0.993917	64.3854	103.78
T148265	BRCAT375	0.1403	0.3	0.993917	4.4317	10.3536
T335007	CAT990	-0.1316	0.3	0.993917	14.0115	20.2673
T291002	LSCAT19	0.1428	0.3	0.993917	10.1024	71.5771
T354380	KHCAT269	-0.1554	0.3	0.993917	29.2871	47.3009
T157239	KCCAT695	0.1482	0.3	0.993917	4.01692	8.18854
T233675	ESAT27	-0.142	0.3	0.993917	7.51617	11.1454
T379682	HNCAT1	0.1426	0.3	0.993917	48.7953	84.3141
T097795	KHCAT460	0.1345	0.3	0.993917	19.2081	64.5017
T293374	CAT745.3	0.1504	0.3	0.993917	18.3134	30.3665
T285247	KHCAT339.2	0.1423	0.3	0.993917	4.28522	10.3266
T138315	AMAT2	0.1331	0.3	0.993917	97.9626	137.898
T046744	CAT1293	-0.1518	0.3	0.993917	39.3992	49.3167
T031478	KCCAT203	0.1293	0.3	0.993917	5.73644	10.4707
T295963	CAT760.2	0.1311	0.3	0.993917	63.7692	100.994
T303925	THCAT509	0.1313	0.3	0.993917	3.25765	4.45898
T189180	AMAT91	-0.143	0.3	0.993917	43.7921	66.0903
T365863	HNCAT154	0.127	0.3	0.993917	11.6632	26.6638
T353050	CAT1113.1	-0.1426	0.3	0.993917	5.70022	10.085
T225405	LINC00649.1	-0.1359	0.3	0.993917	93.0841	115.591
T041872	AMAT87	-0.1493	0.3	0.993917	68.4915	88.0338
T352949	THCAT453	-0.149	0.3	0.993917	6.12648	11.9741
T256544	CMAT7	0.141	0.3	0.993917	6.64414	10.6929
T127337	CAT1818	0.1382	0.3	0.993917	22.8345	33.0672
T288949	CAT715	-0.1459	0.3	0.993917	13.6143	39.878
T228945	KCCAT603	-0.1437	0.3	0.993917	4.43461	9.34232
T004297	PRCAT293	0.1353	0.3	0.993917	22.6763	38.855
T120095	LACAT236	-0.1593	0.3	0.993917	19.052	26.3934
T285614	CVAT20	-0.1578	0.3	0.993917	12.4261	19.7005
T256815	THCAT404	0.1385	0.3	0.993917	2.78793	7.40753
T104423	CAT1663	0.1458	0.3	0.993917	17.8353	41.7043
T261137	PRCAT306	0.1322	0.3	0.993917	92.227	215.692
T177604	CAT2114.3	0.1363	0.3	0.993917	21.5062	166.321
T366269	CAT1193	-0.1376	0.3	0.993917	202.352	361.875
T255263	THCAT60	0.119	0.3	0.993917	26.1466	62.2168
T190486	CAT249.3	-0.1482	0.3	0.993917	14.4777	20.2394
T290418	HICLINC141	0.1351	0.3	0.993917	8.91288	25.3795
T261545	CAT518.1	-0.1511	0.31	0.993917	6.64554	8.66673
T158634	BRCAT302.2	0.1422	0.31	0.993917	8.70453	92.5165
T170654	CAT2080.1	-0.1426	0.31	0.993917	42.3812	60.5213
T353902	CAT1122	-0.1636	0.31	0.993917	51.9584	76.0162
T000486	CAT2.1	-0.148	0.31	0.993917	54.2713	174.06
T352722	CAT1111	-0.1358	0.31	0.993917	16.4766	34.7705
T157805	CAT1993	-0.1409	0.31	0.993917	6.85802	10.0912
T319204	KCCAT333.3	-0.1527	0.31	0.993917	62.2728	399.923
T266253	KHCAT101	-0.1521	0.31	0.993917	3.34804	6.03692
T036012	LINC00702.2	0.1257	0.31	0.993917	17.5881	58.9467
T240503	CAT398	0.1436	0.31	0.993917	5.19294	9.94046
T143792	KHCAT120	0.1379	0.31	0.993917	24.1063	48.5489
T050959	LINC00959	-0.132	0.31	0.993917	41.02	59.794
T256037	CAT482	0.1325	0.31	0.993917	6.39572	22.2663
T268838	THCAT366	-0.1444	0.31	0.993917	27.8674	36.4536
T174674	THCAT98	-0.1303	0.31	0.993917	4.79048	15.0649
T309622	KHCAT404	-0.1434	0.31	0.993917	15.4968	24.4471
T158859	PRCAT279	-0.1525	0.31	0.993917	1.70041	3.04132
T020976	CAT111.2	-0.131	0.31	0.993917	17.2506	33.7949
T339210	CAT1007.4	-0.1488	0.31	0.993917	21.908	36.8471
T049518	CAT1309.2	0.1324	0.31	0.993917	52.6166	62.5333
T262269	CAT525.2	-0.1451	0.31	0.993917	20.5688	29.4956
T187653	CAT230	-0.129	0.31	0.993917	47.8694	88.7611
T076646	CAT1494	-0.1351	0.31	0.993917	143.271	184.812
T350820	BRCAT189	0.1315	0.31	0.993917	3.79672	7.54847
T263989	KHCAT209	-0.133	0.31	0.993917	19.0826	29.1202
T003062	BRCAT354	-0.1483	0.31	0.993917	5.3966	7.3125
T184361	CAT207	0.1539	0.31	0.993917	86.0272	128.019
T070890	BRCAT427	-0.1384	0.31	0.993917	7.47259	13.1561
T196776	MIR4435-1HG.6	0.1349	0.31	0.993917	49.7727	88.4181
T077374	CAT1501.5	-0.1391	0.31	0.993917	996.709	1177.09
T139523	CAT1892.2	-0.145	0.31	0.993917	6.4313	10.8138
T133112	CAT1861	0.1454	0.31	0.993917	5.56012	9.6541
T337028	LSCAT2.1	0.1368	0.31	0.993917	8.73152	16.0018
T369348	CAT1210	-0.146	0.31	0.993917	1.7146	3.29968
T231133	KCCAT319.2	-0.1379	0.31	0.993917	7.84244	15.7355
T304646	BRCAT408	-0.1318	0.31	0.993917	20.8046	46.8527
T169171	CAT2069.2	0.1374	0.31	0.993917	1191.71	1539.5
T129766	CAT1839	0.1404	0.31	0.993917	10.7159	21.2373
T239482	CAT395	0.1291	0.31	0.993917	88.217	118.836
T261315	CAT517.5	-0.1365	0.31	0.993917	3.63002	6.29852
T237220	LSCAT13.3	0.1417	0.31	0.993917	4.5982	16.938
T078076	CAT1508	0.1399	0.31	0.993917	765.246	976.393
T230232	AMAT129	-0.1496	0.31	0.993917	14.4182	19.8913
T307245	CAT831	0.1328	0.31	0.993917	11.391	18.8458
T261544	CAT518.2	-0.1477	0.32	0.993917	6.81398	9.01268
T048144	MEAT148	-0.1432	0.32	0.993917	63.7342	96.2921
T205503	SATB2-AS1.2	0.1305	0.32	0.993917	9.98425	19.0961
T232333	UTAT14	-0.143	0.32	0.993917	8.34705	11.5207
T234599	CAT2253.2	-0.1205	0.32	0.993917	132.985	187.678
T301744	THCAT565	0.1315	0.32	0.993917	148.434	180.021
T268004	FAM13A-AS1	-0.1446	0.32	0.993917	38.3854	50.2993
T044153	MEAT126	-0.1446	0.32	0.993917	90.0583	134.686
T217227	OVAT2	-0.1371	0.32	0.993917	70.1228	116.336
T082919	LGAT113	-0.1392	0.32	0.993917	18.7733	24.8377
T094354	CAT1609	0.148	0.32	0.993917	2.3704	4.40706
T245154	LACAT250	-0.1383	0.32	0.993917	3.74324	7.29338
T361838	BRCAT11	-0.1383	0.32	0.993917	4.60933	10.7158
T171030	THCAT615	-0.1469	0.32	0.993917	6.05184	11.3617
T136859	UTAT61	0.137	0.32	0.993917	3.87607	5.07654
T258183	KCCAT630	-0.144	0.32	0.993917	48.7665	80.413
T038133	NEBL-AS1.3	0.1355	0.32	0.993917	6.09222	11.151
T084315	THCAT356	0.1415	0.32	0.993917	3.52667	7.68328
T122143	PRCAT314	0.1448	0.32	0.993917	6.03488	15.2224
T034582	CAT195.1	-0.1425	0.32	0.993917	54.3859	69.7349
T093537	CAT1602.2	-0.1327	0.32	0.993917	490.564	769.937
T165114	LSCAT207	-0.1445	0.32	0.993917	59.8435	100.015
T036231	CAT1221.1	-0.1316	0.32	0.993917	26.7179	85.7037
T029617	MIR205HG.2	0.1344	0.32	0.993917	101.456	206.804
T029134	PNAT103	0.139	0.32	0.993917	6.33683	8.48401
T202002	BRCAT46	0.1366	0.32	0.993917	5.33085	13.5231
T166956	CAT2050.1	0.1481	0.32	0.993917	6.84071	11.9961
T166629	KCCAT170	-0.1412	0.32	0.993917	3.89527	7.02806
T035945	BRCAT272	-0.127	0.32	0.993917	13.4909	95.7026
T090930	KCCAT353	0.1298	0.32	0.993917	127.4	192.719
T093053	LSCAT199	0.1374	0.32	0.993917	6.4619	12.4081
T056985	CAT1350.3	-0.141	0.32	0.993917	1904.92	2573.35
T114653	SRP14-AS1.2	0.1394	0.32	0.993917	4.81158	7.47272
T274589	CAT606	0.1322	0.32	0.993917	5.24717	19.0599
T243671	CAT409.1	0.1377	0.32	0.993917	53.5781	92.753
T190140	ESAT114	-0.1383	0.32	0.993917	83.8771	119.174
T189074	CAT238	-0.1402	0.32	0.993917	49.8927	79.5951
T232829	HNCAT71.2	0.1401	0.32	0.993917	10.7375	20.8306
T365373	CAT1187	0.1305	0.32	0.993917	25.3706	50.4394
T009120	KCCAT32	0.1328	0.32	0.993917	90.0281	141.556
T079753	CAT1526	0.1304	0.32	0.993917	6.7637	20.0991
T099945	KCCAT513.1	0.134	0.32	0.993917	2.45437	5.9299
T253003	THCAT552	-0.1268	0.32	0.993917	8.12085	20.0093
T171028	THCAT611	-0.1439	0.32	0.993917	8.21628	19.9743
T367411	CAT1204.6	0.1402	0.32	0.993917	125.143	173.173
T375948	IGBP1-AS2	-0.15	0.32	0.993917	106.9	176.342
T183565	LSCAT88	-0.1458	0.32	0.993917	4.6866	7.20567
T353390	CAT1115.4	-0.1451	0.32	0.993917	9.80072	18.61
T378637	CRAT45	-0.1313	0.33	0.993917	31.0707	63.7437
T334872	CAT989	-0.127	0.33	0.993917	272.008	380.226
T065407	CAT1407	-0.1332	0.33	0.993917	5.00227	9.84601
T169553	CAT2072	-0.1422	0.33	0.993917	1.48988	3.79811
T374409	KCCAT31	-0.1253	0.33	0.993917	191.761	233.166
T312896	KCCAT562	-0.1341	0.33	0.993917	14.4814	26.4456
T321378	AMAT63	0.1273	0.33	0.993917	5.73855	8.30082
T334375	MEAT138	-0.141	0.33	0.993917	6.90067	11.0207
T340488	CAT1013.1	0.1215	0.33	0.993917	152.559	259.513
T322202	INHBA-AS1	0.1352	0.33	0.993917	21.6391	70.4477
T307419	CAT833	-0.1253	0.33	0.993917	47.3377	57.7425
T110055	KCCAT561	-0.1333	0.33	0.993917	12.1298	21.5387
T303845	UTAT20	0.1235	0.33	0.993917	40.1064	51.8604
T114423	BRCAT202	0.1255	0.33	0.993917	4.43221	9.33092
T352642	CAT1110	-0.145	0.33	0.993917	34.574	59.9059
T186359	CAT217	-0.1298	0.33	0.993917	68.0781	92.8795
T089127	CAT1579	0.1306	0.33	0.993917	5.01914	59.13
T195370	THCAT499	-0.1223	0.33	0.993917	27.7553	38.7602
T028467	CAT153	0.129	0.33	0.993917	21.9178	32.6954
T231158	CAT2230	-0.1192	0.33	0.993917	8.08976	15.5366
T353116	CAT1114.2	0.1354	0.33	0.993917	8.02988	17.6251
T090882	CAT1583	0.1392	0.33	0.993917	30.5727	58.1128
T100325	CAT1639	0.127	0.33	0.993917	47.537	64.766
T198160	CAT303.1	-0.1334	0.33	0.993917	4.26877	5.73896
T191948	DGUOK-AS1.2	-0.141	0.33	0.993917	77.7536	110.274
T280557	CAT650	0.1332	0.33	0.993917	40.6996	61.503
T278745	KCCAT706	0.1218	0.33	0.993917	6.80215	11.7939
T299453	CAT782	-0.1284	0.33	0.993917	7.65691	19.1386
T213910	THCAT536	0.124	0.33	0.993917	5.62666	9.38269
T038735	AMAT14	-0.1261	0.33	0.993917	46.8539	60.9811
T342857	CAT1031	-0.1328	0.33	0.993917	207.181	296.507
T015631	PRCAT209	0.1406	0.33	0.993917	36.2349	65.5045
T356436	MIR31HG.1	0.1353	0.33	0.993917	65.4043	151.091
T355728	CAT1132	0.1374	0.33	0.993917	11.6741	18.9058
T337685	KHCAT231	0.121	0.33	0.993917	2.98208	4.56969
T177396	CAT2113.1	-0.1275	0.33	0.993917	19.2434	34.9499
T040715	CAT1254	0.1419	0.33	0.993917	44.6178	61.5005
T230105	AMAT168	0.1355	0.33	0.993917	2.4577	4.1656
T331760	CAT970	0.1288	0.33	0.993917	6.21894	12.8112
T138053	CAT1884.5	0.1414	0.33	0.993917	22.7466	52.8581
T128185	CVAT3	0.1321	0.33	0.993917	29.0095	42.8102
T287630	CAT704	-0.1377	0.33	0.993917	18.4041	47.2034
T077428	CAT1502.1	0.1436	0.33	0.993917	5.57087	15.3224
T373993	THCAT255	-0.1361	0.33	0.993917	2.40144	3.82875
T125481	BRCAT225	-0.1274	0.33	0.993917	9.61917	13.5875
T148462	ASB16-AS1.2	-0.1358	0.33	0.993917	166.786	249.778
T352044	CAT1107	-0.1362	0.33	0.993917	51.0564	95.3177
T244582	PRICKLE2-AS1.2	0.1221	0.33	0.993917	4.36157	8.30566
T018951	CAT103	0.1383	0.33	0.993917	39.4887	53.456
T282972	PART1.4	-0.1487	0.33	0.993917	8.81075	24.0265
T260791	THCAT542	0.1389	0.33	0.993917	1.49706	2.98586
T006482	CAT29	-0.1239	0.34	0.993917	13.369	23.8805
T257672	TMEM44-AS1.2	-0.1303	0.34	0.993917	19.3264	32.8065
T175025	CAT2100.2	-0.1273	0.34	0.993917	506.158	688.747
T320704	JAZF1-AS1.2	0.1371	0.34	0.993917	3.04869	5.94147
T062970	HNCAT158	0.13	0.34	0.993917	50.0025	118.955
T283690	CAT670	-0.1369	0.34	0.993917	4.90055	6.51522
T170431	CAT2077.1	-0.1318	0.34	0.993917	72.2407	122.551
T018058	CAT94.1	-0.132	0.34	0.993917	2.55684	4.64777
T272992	CAT597	0.1366	0.34	0.993917	19.9118	33.0388
T240877	LACAT51	0.1364	0.34	0.993917	3.02386	29.9539
T286651	KCCAT25	0.1315	0.34	0.993917	1.81729	4.54867
T231741	LSCAT12	0.1206	0.34	0.993917	10.5254	23.7298
T061605	THCAT133	0.1147	0.34	0.993917	21.2126	30.7459
T302165	CAT793.1	0.1229	0.34	0.993917	1889.18	2583.15
T192655	CAT266.3	-0.1348	0.34	0.993917	93.2678	108.272
T252949	MME-AS1.1	0.1353	0.34	0.993917	2.14913	9.89629
T030354	CAT164	-0.1276	0.34	0.993917	11.9549	19.7717
T099947	KCCAT230	0.1211	0.34	0.993917	10.114	18.166
T369397	SNHG7.1	0.1361	0.34	0.993917	66.7754	123.254
T342446	CAT1026	0.1292	0.34	0.993917	19.0689	31.7443
T067443	CAT1420	0.1228	0.34	0.993917	3.36524	6.53909
T346504	KCCAT503	-0.136	0.34	0.993917	12.9518	37.6388
T013488	CAT68	-0.1445	0.34	0.993917	3.30016	7.48854
T255234	CAT475.8	-0.142	0.34	0.993917	13.3064	38.9869
T122684	CAT1789.1	-0.1335	0.34	0.993917	5.13124	9.19132
T330641	OVAT3	-0.1336	0.34	0.993917	26.5592	38.9926
T109783	PRCAT114	-0.1196	0.34	0.993917	37.769	54.3097
T357795	CAT1140	-0.1314	0.34	0.993917	8.85122	13.2282
T196811	CAT293.3	0.1168	0.34	0.993917	13.1737	24.5078
T174446	THCAT507	-0.1414	0.34	0.993917	28.2954	42.8186
T195386	AMAT28	-0.1338	0.34	0.993917	37.741	51.0082
T287278	CAT699.1	-0.1407	0.34	0.993917	4.99131	38.5927
T332495	CAT971	-0.1337	0.34	0.993917	29.319	66.9834
T237567	AMAT67	-0.1324	0.34	0.993917	102.242	157.685
T203106	CAT331.3	0.1413	0.34	0.993917	3.70224	34.7928
T139540	AMAT138	0.1397	0.34	0.993917	5.66538	10.3304
T084375	MEAT139	-0.1318	0.34	0.993917	17.3525	23.0973
T188030	CAT233	-0.1381	0.34	0.993917	61.6522	101.139
T189536	CAT241	-0.1282	0.34	0.993917	2.30155	3.79074
T099719	GRTP1-AS1	0.1294	0.34	0.993917	6.22863	8.91241
T343422	BRCAT104	-0.127	0.34	0.993917	10.78	13.8291
T244583	PRICKLE2-AS1.1	0.1265	0.34	0.993917	2.913	5.71288
T148958	MAP3K14-AS1.2	-0.134	0.34	0.993917	24.0445	40.6612
T243101	CAT407.2	0.1161	0.34	0.993917	211.823	258.551
T341139	HICLINC185.1	-0.131	0.34	0.993917	79.8476	164.541
T254672	CAT471	0.1195	0.35	0.993917	55.1362	79.7741
T314380	CAT885.1	0.132	0.35	0.993917	140.96	179.345
T274516	CAT605	-0.1342	0.35	0.993917	17.4724	30.9278
T082929	KCCAT699	0.127	0.35	0.993917	61.0889	81.4794
T250319	H1FX-AS1.1	0.1174	0.35	0.993917	9.47629	22.3984
T055045	CAT1337.2	0.1243	0.35	0.993917	177.21	350.897
T060502	KHCAT7	-0.1335	0.35	0.993917	4.42779	10.1992
T246545	THCAT427	-0.1351	0.35	0.993917	2.82121	4.48765
T297295	CAT767	-0.1175	0.35	0.993917	24.8298	29.0592
T048561	HNCAT285	0.1305	0.35	0.993917	7.95885	21.2082
T006269	MEAT152	-0.1316	0.35	0.993917	9.98022	16.8163
T327807	CAT949.1	-0.1233	0.35	0.993917	4.83426	6.72902
T319313	KCCAT333.1	-0.1439	0.35	0.993917	13.1455	69.6924
T175664	KHCAT243	0.1282	0.35	0.993917	89.6956	163.214
T047479	CAT1295.2	-0.1262	0.35	0.993917	12.644	23.3675
T281631	CAT655.1	0.137	0.35	0.993917	161.248	442.363
T366906	CAT1199.2	0.1304	0.35	0.993917	102.675	158.716
T225820	CAT2208.2	-0.1206	0.35	0.993917	50.0287	62.3756
T295444	TRIM52-AS1.2	-0.1258	0.35	0.993917	30.3471	39.3183
T203095	LSCAT195	0.1283	0.35	0.993917	2.42012	7.27286
T052268	MIR210HG.2	0.1229	0.35	0.993917	12.2042	20.1064
T376410	FTX	-0.1229	0.35	0.993917	17.0165	26.5956
T219713	CAT2180.3	0.127	0.35	0.993917	77.1063	136.746
T179786	KCCAT550	-0.1265	0.35	0.993917	2.74595	6.72148
T177855	CAT2117.2	0.1223	0.35	0.993917	11.0436	28.5299
T119719	KCCAT588	0.1248	0.35	0.993917	6.4455	11.4488
T140690	MIR497HG.2	-0.1176	0.35	0.993917	12.1756	18.0813
T118151	LACAT184	0.1291	0.35	0.993917	5.63957	9.62482
T360998	CAT1157	0.1222	0.35	0.993917	40.5487	52.0886
T166222	CAT2045.4	0.13	0.35	0.993917	33.7251	64.2837
T261131	PRCAT286.1	0.1297	0.35	0.993917	12.0659	23.5672
T278770	MEAT13	-0.1303	0.35	0.993917	4.51449	8.06063
T045545	CAT1285.2	-0.1301	0.35	0.993917	219.353	271.456
T155162	KCCAT111	0.1187	0.35	0.993917	162.346	240.892
T369615	KHCAT10	0.1202	0.35	0.993917	7.67806	11.8872
T097941	HICLINC295	0.1263	0.35	0.993917	119.828	160.036
T223557	HICLINC383	-0.1217	0.35	0.993917	30.3819	52.0515
T074554	CAT1479	-0.1329	0.36	0.993917	16.5043	26.9563
T168482	CAT2063.1	-0.124	0.36	0.993917	14.2804	36.2985
T302771	KCCAT300	0.1209	0.36	0.993917	6.96145	13.7286
T365891	CAT1189	0.1172	0.36	0.993917	3.76605	6.63831
T066064	CAT1413	0.1271	0.36	0.993917	12.182	17.0539
T350780	RNF139-AS1.1	0.1269	0.36	0.993917	11.5368	27.6733
T249156	KCCAT593	0.124	0.36	0.993917	3.83831	7.59059
T106671	CAT1683.1	-0.1319	0.36	0.993917	330.69	408.57
T307142	HNCAT210	-0.1216	0.36	0.993917	22.0845	44.4357
T114881	CAT1729.1	-0.1271	0.36	0.993917	45.8018	69.5807
T353736	PRCAT88	-0.1237	0.36	0.993917	15.8473	30.5987
T318336	CAT899	0.1253	0.36	0.993917	15.5487	26.8391
T186723	CAT219.3	-0.1311	0.36	0.993917	49.4167	69.9508
T116347	CVAT30	-0.1258	0.36	0.993917	3.54017	13.5319
T054064	CAT1331	0.1194	0.36	0.993917	160.677	279.594
T121387	KCCAT232	0.1245	0.36	0.993917	35.7859	53.3046
T295574	CAT758	0.1237	0.36	0.993917	16.4949	32.6363
T190670	CAT252.1	-0.1252	0.36	0.993917	11.0202	14.4446
T206257	CAT355.2	-0.1311	0.36	0.993917	277.735	357.65
T191903	CAT263	-0.1137	0.36	0.993917	62.6763	78.3167
T306833	CAT824.1	0.1339	0.36	0.993917	2.5528	5.02703
T195352	CAT282	-0.1278	0.36	0.993917	184.989	302.886
T244590	CAT416.5	-0.1358	0.36	0.993917	4.15333	10.5749
T044117	KHCAT369	-0.1267	0.36	0.993917	62.558	104.053
T169312	KCCAT619	0.1221	0.36	0.993917	22.1843	38.9963
T145874	KHCAT448	-0.1209	0.36	0.993917	386.558	520.463
T363039	CAT1168.4	0.1274	0.36	0.993917	13.5665	22.1882
T151854	CAT1962	-0.1305	0.36	0.993917	62.6453	89.5848
T289235	CAT719	-0.1262	0.36	0.993917	3.88217	18.7909
T139444	MIR22HG.1	0.136	0.36	0.993917	405.895	624.954
T260023	CAT510.2	-0.1265	0.36	0.993917	3.01964	19.7932
T117605	CAT1758	-0.135	0.36	0.993917	3.22641	6.99647
T016134	KCCAT131.2	0.1164	0.36	0.993917	16.9622	41.3031
T379477	KCCAT543	-0.1246	0.36	0.993917	12.1151	17.0492
T179427	KHCAT1	0.1362	0.36	0.993917	1.92105	31.8615
T019181	CAT104	-0.122	0.36	0.993917	185.263	250.823
T177397	CAT2113.2	-0.1289	0.36	0.993917	81.4968	132.836
T026522	CAT145	0.1252	0.36	0.993917	10.5018	23.5148
T187220	CAT224.2	0.1237	0.36	0.993917	9.06112	14.8278
T186945	MEAT132	0.1189	0.36	0.993917	208.515	336.372
T025532	CAT138	0.1188	0.36	0.993917	81.6595	112.416
T175597	CAT2104	-0.1348	0.36	0.993917	7.65356	13.7076
T190890	OVAT4	-0.137	0.36	0.993917	49.4214	69.648
T110089	CAT1701	0.12	0.36	0.993917	341.143	462.158
T022332	CAT120	-0.1174	0.36	0.993917	575.218	1133.84
T006219	THCAT351	0.1343	0.36	0.993917	52.181	74.7293
T128161	THCAT194	0.122	0.36	0.993917	7.08541	8.79944
T174217	LSCAT237	-0.1252	0.36	0.993917	20.9609	30.9342
T319146	CAT907.8	-0.1345	0.36	0.993917	18.1997	49.575
T357426	AMAT134	-0.125	0.36	0.993917	8.84963	12.5435
T172092	CAT2091	-0.1258	0.36	0.993917	12.6892	19.7226
T310866	BRCAT246	0.1223	0.36	0.993917	3.04306	7.31234
T204788	THCAT114	0.1282	0.36	0.993917	12.2867	22.2734
T348281	HICLINC207.2	-0.1381	0.36	0.993917	21.3486	30.6697
T169470	OVAT116	0.1279	0.37	0.993917	4.14584	7.27032
T180441	KHCAT250	-0.1194	0.37	0.993917	16.8754	22.6194
T044900	OVAT44	-0.1254	0.37	0.993917	73.1156	99.5975
T371496	CAT2272	0.129	0.37	0.993917	6.10219	633.981
T347609	CAT1062.1	-0.1227	0.37	0.993917	120.408	155.808
T232291	KHCAT160	0.1143	0.37	0.993917	28.8508	40.947
T155939	CAT1983.1	-0.1352	0.37	0.993917	4.33249	10.7954
T184438	KCCAT55	0.1195	0.37	0.993917	9.46065	13.3714
T229181	KCCAT694	0.1183	0.37	0.993917	7.35859	12.7963
T252251	WWTR1-AS1.2	0.1204	0.37	0.993917	20.9077	27.3517
T215473	CAT2152.1	0.1425	0.37	0.993917	699.474	992.391
T115838	CAT1735	0.1103	0.37	0.993917	36.5857	53.2704
T028911	CAT155.1	0.1289	0.37	0.993917	4.33614	16.6266
T182391	UTAT8.1	-0.1215	0.37	0.993917	35.3582	49.3577
T237322	KHCAT424	0.122	0.37	0.993917	104.468	207.088
T047724	MBAT88	-0.1219	0.37	0.993917	291.427	506.275
T171224	CAT2082.1	0.1197	0.37	0.993917	87.675	207.867
T201872	PRCAT211	-0.1188	0.37	0.993917	21.1218	71.366
T330024	HNCAT59	0.1253	0.37	0.993917	156.604	362.564
T012272	CAT60.1	0.1167	0.37	0.993917	11.1862	19.1192
T002775	CAT13.2	0.1272	0.37	0.993917	8.35055	12.4825
T072394	CAT1463	0.1168	0.37	0.993917	10.5978	38.8023
T189457	CAT239	-0.1173	0.37	0.993917	26.8414	36.8659
T238837	MBAT103	-0.1227	0.37	0.993917	475.173	620.642
T257603	CAT497	0.1152	0.37	0.993917	35.3471	63.9064
T215907	ESAT112	-0.1202	0.37	0.993917	52.6679	79.9755
T116764	LSCAT151	0.1207	0.37	0.993917	16.7644	28.1535
T153125	CAT1969.2	0.125	0.37	0.993917	7.11494	16.1557
T106737	CAT1684.1	0.1274	0.37	0.993917	28.4677	45.1851
T267804	CAT571	-0.1246	0.37	0.993917	10.6973	25.5909
T164773	STCAT16	-0.1319	0.37	0.993917	1.91318	21.6212
T335940	KCCAT288	-0.1275	0.37	0.993917	26.5509	36.006
T156793	KPCAT55	-0.138	0.37	0.993917	3.58198	7.14772
T229159	CAT2223.1	-0.1272	0.37	0.993917	3.04357	4.91439
T139443	CAT1890	0.1221	0.37	0.993917	78.4637	103.466
T028137	CAT152.2	-0.1227	0.37	0.993917	140.205	228.058
T046285	CAT1290	-0.1148	0.37	0.993917	24.1556	33.6434
T246531	CAT428	-0.1318	0.37	0.993917	56.7744	75.6373
T144761	CAT1920.1	0.1299	0.37	0.993917	46.4657	114.074
T128814	CAT1828	-0.1135	0.37	0.993917	208.439	247.818
T315256	KCCAT330	-0.1275	0.37	0.993917	3.17487	5.37737
T331246	CAT966	-0.1307	0.37	0.993917	3.93213	7.07312
T373822	CAT2279.1	0.113	0.37	0.993917	71.9586	128.547
T107619	THCAT422.1	0.127	0.37	0.993917	2.91769	5.43694
T144453	CAT1917.2	-0.1257	0.37	0.993917	97.0743	262.191
T006066	MEAT147	-0.1314	0.37	0.993917	33.7873	51.2235
T094097	CAT1608	0.1166	0.37	0.993917	5.92939	9.64902
T305164	TRAM2-AS1.1	-0.1188	0.37	0.993917	92.5553	115.015
T153661	LINC00511.12	0.1207	0.37	0.993917	18.8455	26.2301
T061258	MALAT1.1	0.1247	0.38	0.993917	2063.94	3753.66
T066953	KHCAT161	-0.1197	0.38	0.993917	2.12843	4.25182
T252683	MBNL1-AS1.3	0.1203	0.38	0.993917	21.2124	35.8815
T200456	CAT316	-0.117	0.38	0.993917	14.9552	23.5738
T055817	BRCAT73.1	-0.1244	0.38	0.993917	3.92175	9.53535
T133951	CAT1865	0.1208	0.38	0.993917	75.5688	91.1534
T005666	LSCAT68.1	0.121	0.38	0.993917	14.2134	25.401
T221134	OVAT151	-0.1213	0.38	0.993917	6.10512	18.6997
T169449	CAT2070.1	0.1087	0.38	0.993917	22.7168	28.5187
T139868	PRCAT284	0.1195	0.38	0.993917	6.02099	29.165
T024811	KCCAT700	0.1174	0.38	0.993917	35.3262	60.2677
T121983	MEAT119	0.1224	0.38	0.993917	11.3836	17.1912
T327266	THCAT391	-0.1178	0.38	0.993917	4.52792	5.66311
T272285	ESAT2	0.1261	0.38	0.993917	86.825	134.807
T365823	CAT1188	0.1203	0.38	0.993917	63.2703	87.1002
T114826	MBAT83	0.1219	0.38	0.993917	8.96663	14.1854
T018595	CAT99.1	-0.1307	0.38	0.993917	260.035	341.313
T200482	CAT317	-0.1273	0.38	0.993917	8.10493	16.9681
T212354	OVAT142	-0.1277	0.38	0.993917	7.43631	11.0295
T253562	THCAT583	-0.1193	0.38	0.993917	28.127	36.1592
T104333	LINC00519	0.1227	0.38	0.993917	19.9729	63.4576
T333265	MESTIT1	-0.1349	0.38	0.993917	4.12529	9.74461
T251873	CAT456	-0.1189	0.38	0.993917	7.03513	19.1333
T342624	KCCAT77	-0.1213	0.38	0.993917	10.2903	60.2885
T380486	LINC00087	0.1164	0.38	0.993917	38.6561	64.0878
T193441	LINC00152.3	0.1145	0.38	0.993917	449.038	801.604
T049520	CAT1309.1	-0.1213	0.38	0.993917	125.735	160.935
T092384	CAT1593.2	0.1106	0.38	0.993917	5.32925	12.9389
T200696	OVAT80	-0.124	0.38	0.993917	4.19368	6.32213
T114874	CAT1729.3	0.119	0.38	0.993917	20.4999	32.8059
T290794	KCCAT140	0.1087	0.38	0.993917	5.48976	10.3939
T087726	CAT1575.1	0.1248	0.38	0.993917	86.4336	140.412
T014806	CAT75.1	0.117	0.38	0.993917	3.5256	5.4176
T357710	PNAT122	-0.1268	0.38	0.993917	4.23344	9.29405
T120395	LACAT172	-0.1213	0.38	0.993917	4.07869	5.37053
T300589	MDC1-AS1	0.1131	0.38	0.993917	36.3934	49.8692
T009554	KDM4A-AS1.2	-0.1269	0.38	0.993917	46.3135	70.1074
T284573	CAT678	-0.1132	0.38	0.993917	51.8825	69.0645
T136965	KHCAT198	0.1198	0.38	0.993917	4.78241	8.04182
T373737	UTAT48	-0.1279	0.38	0.993917	3.29518	6.12387
T281074	CAT652	-0.1139	0.38	0.993917	301.416	409.483
T192140	LBX2-AS1.3	-0.1156	0.38	0.993917	86.7846	137.134
T231126	KCCAT319.1	-0.1218	0.38	0.993917	21.8536	40.8277
T129955	CAT1841.1	-0.1112	0.39	0.993917	215.368	340.558
T042211	CAT1262.1	-0.1153	0.39	0.993917	26.6469	954.05
T364549	KHCAT138.2	0.1105	0.39	0.993917	9.02576	14.2711
T305611	BRCAT262	-0.1102	0.39	0.993917	6.46045	9.91091
T072370	CAT1462	0.119	0.39	0.993917	214.902	375.583
T186059	AMAT125	-0.1277	0.39	0.993917	5.74856	8.70006
T256885	TPRG1-AS2	0.1179	0.39	0.993917	12.142	37.8562
T272835	CAT593.1	-0.1149	0.39	0.993917	14.3331	17.774
T173087	MEAT99	-0.1101	0.39	0.993917	41.9106	58.2273
T042002	KHCAT373	-0.1115	0.39	0.993917	48.034	65.1289
T228296	MCM3AP-AS1.2	-0.1194	0.39	0.993917	36.6584	57.6195
T107664	CVAT14	0.1173	0.39	0.993917	7.15928	11.8676
T345171	CAT1052	0.1108	0.39	0.993917	2.55684	6.25801
T105741	CAT1678	-0.1139	0.39	0.993917	8.97462	11.5538
T360964	BRCAT405	-0.1332	0.39	0.993917	2.94397	4.49454
T299371	KCCAT524	-0.1241	0.39	0.993917	24.6908	41.248
T290970	CAT731	0.122	0.39	0.993917	5.18769	31.7279
T369840	CAT1212	0.1233	0.39	0.993917	243.576	376.189
T076032	CAT1492.2	0.114	0.39	0.993917	9.57361	23.7083
T029619	MIR205HG.4	0.1137	0.39	0.993917	1146.96	2134.55
T304570	OVAT136	0.123	0.39	0.993917	1.64972	5.50956
T252882	LACAT207	-0.1137	0.39	0.993917	3.55575	5.7947
T159667	CAT2005.2	0.1142	0.39	0.993917	3.84415	9.33034
T239183	GBAT8	-0.1195	0.39	0.993917	91.6683	127.394
T030046	AMAT8	0.117	0.39	0.993917	41.593	56.2459
T348768	CAT1076.2	-0.114	0.39	0.993917	18.2438	23.7238
T149369	CAT1942	-0.1244	0.39	0.993917	6.30046	16.4102
T056989	CAT1350.1	-0.1185	0.39	0.993917	1317.98	1825.28
T331690	CAT968	0.122	0.39	0.993917	15.1259	36.3747
T376390	JPX.2	-0.1223	0.39	0.993917	17.9413	24.7776
T328733	DLX6-AS1.2	-0.1283	0.39	0.993917	14.1481	51.6426
T190484	CAT249.2	0.1095	0.39	0.993917	5.5186	9.10909
T272860	MEAT130.2	0.1172	0.39	0.993917	15.2535	21.6209
T302362	KCCAT557	0.1162	0.39	0.993917	16.0974	24.9587
T312829	CAT875	0.1211	0.39	0.993917	5.20352	10.9822
T058234	CAT1354	0.1209	0.39	0.993917	6.64573	13.832
T380370	MIR503HG.2	-0.1184	0.39	0.993917	27.9786	50.115
T131097	THCAT216	-0.1178	0.39	0.993917	10.5843	14.99
T342925	CAT1034	0.1128	0.39	0.993917	22.684	39.2511
T220184	LSCAT77.3	0.1228	0.39	0.993917	9.66756	34.9181
T228428	CAT2220	-0.1307	0.39	0.993917	123.947	158.447
T342987	KCCAT577	-0.1168	0.39	0.993917	68.6187	95.4682
T225402	LINC00649.3	-0.1157	0.39	0.993917	347.661	438.622
T354539	ZNF252P-AS1	-0.1268	0.39	0.993917	2.43675	4.75981
T285014	BRCAT178	-0.1186	0.4	0.993917	1.66369	3.88149
T074099	CAT1473.2	-0.1174	0.4	0.993917	213.417	281.225
T196783	MIR4435-1HG.2	0.117	0.4	0.993917	16.1974	28.1762
T040199	CAT1248	-0.1175	0.4	0.993917	14.1033	25.8372
T322753	KCCAT512	0.1141	0.4	0.993917	181.004	249.083
T351417	CAT1100.1	0.108	0.4	0.993917	35.9808	63.6171
T045698	KHCAT376	0.1124	0.4	0.993917	3.01547	5.39466
T301669	CAT789	-0.1088	0.4	0.993917	195.893	285.382
T119766	UTAT12	0.1142	0.4	0.993917	12.6502	18.5598
T287304	KCCAT305	0.1186	0.4	0.993917	2.17255	3.50348
T345963	LGAT5	-0.1223	0.4	0.993917	1.8923	2.66424
T037232	AMAT77	-0.1081	0.4	0.993917	52.8896	79.2057
T100135	CAT1635	-0.12	0.4	0.993917	29.0055	50.6255
T269959	KHCAT273	0.117	0.4	0.993917	2.61736	10.5198
T037147	CAT1229	-0.1195	0.4	0.993917	59.3596	101.276
T343450	CAT1037	0.1064	0.4	0.993917	22.1396	42.9437
T214688	ESAT110.2	0.1034	0.4	0.993917	83.53	112.295
T214687	ESAT110.1	0.1034	0.4	0.993917	83.53	112.295
T027892	MBAT113	-0.1155	0.4	0.993917	64.2115	80.8483
T160574	LVCAT69	-0.1233	0.4	0.993917	6.16585	7.62172
T303621	CAT802	-0.1124	0.4	0.993917	43.8309	67.1212
T168322	ILF3-AS1	-0.1136	0.4	0.993917	699.862	876.7
T033175	MPAT1	0.1135	0.4	0.993917	334.367	419.533
T016624	CAT86	-0.1204	0.4	0.993917	104.549	131.607
T195042	CAT279	0.1143	0.4	0.993917	4.48027	9.48681
T018107	KCCAT153	-0.1128	0.4	0.993917	3.53435	9.79182
T212418	SDCBP2-AS1.2	-0.1238	0.4	0.993917	15.3619	31.7522
T224579	CAT2199	-0.1209	0.4	0.993917	4.89255	10.0611
T233755	CAT2247.2	-0.1149	0.4	0.993917	121.956	163.828
T175034	HNCAT112	-0.1139	0.4	0.993917	5.96222	12.161
T314089	CAT882.4	-0.1151	0.4	0.993917	0.830245	5.09506
T050678	CAT1319.2	0.1143	0.4	0.993917	4.97753	24.2601
T203610	KPCAT101	-0.1153	0.4	0.993917	4.09879	7.49547
T333338	CAT977.1	-0.108	0.4	0.993917	105.005	164.746
T136805	PRCAT47.2	-0.1196	0.4	0.993917	3.21321	9.43291
T299079	KPCAT13	-0.1162	0.4	0.993917	31.4555	51.7232
T009559	KDM4A-AS1.1	-0.121	0.4	0.993917	6.62076	11.1698
T126257	KCCAT311	0.118	0.4	0.993917	9.57906	15.9045
T278796	SNHG18.2	-0.1077	0.4	0.993917	883.916	1202.82
T110623	UTAT22	0.1162	0.4	0.993917	21.6625	28.3785
T212433	SDCBP2-AS1.3	0.1147	0.4	0.993917	221.886	261.248
T168316	MEAT145	-0.1255	0.4	0.993917	7.56231	10.5857
T354908	HICLINC214.7	-0.1056	0.4	0.993917	12.9083	26.8326
T098795	CAT1631	0.1049	0.41	0.993917	14.3936	38.0895
T183455	THCAT532	0.1081	0.41	0.993917	29.7389	43.0271
T175026	CAT2100.1	0.1054	0.41	0.993917	32.9574	43.5472
T083545	CAT1557.1	-0.1125	0.41	0.993917	15.9154	34.8838
T062567	BRCAT205	-0.1128	0.41	0.993917	106.601	179.742
T341003	UTAT31	0.116	0.41	0.993917	32.711	43.1011
T093350	BRCAT416	-0.1059	0.41	0.993917	16.4186	21.6799
T283685	CRAT25	0.1042	0.41	0.993917	19.6379	24.2094
T007150	CAT33	-0.119	0.41	0.993917	24.0445	84.9635
T118007	CAT1764.2	-0.1209	0.41	0.993917	21.276	28.3885
T039117	ESAT116.2	-0.1187	0.41	0.993917	619.308	809.41
T349396	CAT1083	-0.114	0.41	0.993917	51.0696	74.3431
T284994	CKMT2-AS1.2	0.1027	0.41	0.993917	84.6077	105.818
T135959	LACAT90	0.1059	0.41	0.993917	8.60875	14.0435
T041024	CAT1255	-0.1275	0.41	0.993917	264.205	431.269
T003930	BRCAT238	0.1147	0.41	0.993917	117.797	222.682
T320359	HRAT26	-0.113	0.41	0.993917	33.0379	48.4987
T242349	CAT403.2	-0.1229	0.41	0.993917	19.3289	28.4354
T011370	BRCAT113	0.1236	0.41	0.993917	18.858	26.9644
T052863	CAT1325	0.115	0.41	0.993917	367.224	537.708
T343836	KHCAT83	-0.116	0.41	0.993917	58.7296	79.9301
T245053	KHCAT32	-0.1235	0.41	0.993917	99.6342	145.517
T354959	THCAT387	-0.1223	0.41	0.993917	2.56827	5.54875
T241165	CAT401.1	-0.1185	0.41	0.993917	253.919	347.268
T334320	CAT986	0.116	0.41	0.993917	2.58813	8.65988
T155521	KPCAT17	-0.117	0.41	0.993917	13.8709	23.268
T132673	CAT1854.2	0.1104	0.41	0.993917	9.80527	52.5572
T035096	CMAT19	0.106	0.41	0.993917	11.7295	15.7275
T089368	KCCAT9	-0.1078	0.41	0.993917	25.1426	38.9414
T124669	CAT1800.2	0.1047	0.41	0.993917	103.742	161.322
T099075	KCCAT529	0.1143	0.41	0.993917	2.84579	4.70083
T066397	KCCAT234	0.1095	0.41	0.993917	8.34724	20.8916
T054687	SBF2-AS1.6	0.1057	0.41	0.993917	38.7362	59.3055
T214237	THCAT502	0.1112	0.41	0.993917	8.35062	11.9023
T137263	LSCAT215	-0.1188	0.41	0.993917	10.8441	17.0461
T115380	CAT1731	0.1091	0.41	0.993917	118.896	152.745
T196070	THCAT456	-0.111	0.41	0.993917	217.148	305.883
T322086	AMAT74	-0.1163	0.41	0.993917	174.449	219.902
T194169	CAT275	-0.1179	0.41	0.993917	20.1899	29.0447
T063450	PNAT124	-0.1087	0.41	0.993917	26.3606	40.0743
T125424	KHCAT2	-0.1257	0.41	0.993917	39.2028	55.4523
T355398	AMAT108	-0.1086	0.41	0.993917	7.69431	10.3894
T188496	HNCAT36	-0.1099	0.41	0.993917	117.377	417.894
T003426	CAT18.1	0.117	0.41	0.993917	5.69067	7.88622
T152186	AMAT93	-0.115	0.42	0.993917	58.7773	106.935
T066031	CAT1412	0.1065	0.42	0.993917	16.8945	24.9088
T150556	CAT1953.1	-0.1147	0.42	0.993917	4.96202	22.1815
T301683	PRCAT30.2	-0.1183	0.42	0.993917	105.104	184.759
T309954	CAT855	-0.1128	0.42	0.993917	47.6262	84.4589
T219474	ZFAS1.2	0.1064	0.42	0.993917	1978.62	2669.56
T027959	CAT151.2	0.107	0.42	0.993917	144.826	211.041
T296587	PRCAT13.2	-0.1045	0.42	0.993917	19.6545	34.5526
T276755	CAT630.1	-0.1139	0.42	0.993917	7.40818	11.7004
T365967	CAT1190	0.1082	0.42	0.993917	79.5968	127.133
T275626	KHCAT155	0.1175	0.42	0.993917	23.5952	31.9344
T075893	CAT1491	0.102	0.42	0.993917	87.4023	105.702
T117783	HNCAT46	0.1098	0.42	0.993917	4.82564	8.86522
T107162	CAT1688.1	-0.116	0.42	0.993917	169.369	212.687
T196762	CAT291.1	0.1165	0.42	0.993917	117.031	151.023
T350375	HAS2-AS1	0.107	0.42	0.993917	26.0978	53.5773
T188979	BRCAT210	0.1042	0.42	0.993917	10.7969	14.8983
T333068	LSCAT280	-0.1127	0.42	0.993917	4.98743	7.58341
T308580	BLCAT4	0.1137	0.42	0.993917	42.6934	52.9188
T124528	CAT1799	0.1194	0.42	0.993917	2.68939	5.10998
T354897	CAT1129	-0.111	0.42	0.993917	311.912	436.425
T051889	CAT1322	0.1104	0.42	0.993917	477.179	571.726
T346159	CASC9.3	-0.1085	0.42	0.993917	26.201	51.794
T030165	FLVCR1-AS1	-0.1108	0.42	0.993917	14.8517	21.4251
T366258	CAT1192.2	-0.1058	0.42	0.993917	16.6998	25.633
T091002	CAT1585	0.1163	0.42	0.993917	18.9277	30.6048
T043903	DNAJC9-AS1	-0.1082	0.42	0.993917	18.024	35.1737
T006967	HRAT2	-0.1108	0.42	0.993917	20.4494	29.7639
T150404	BRCAT103	0.1177	0.42	0.993917	245.319	306.095
T116002	LACAT70	0.1085	0.42	0.993917	4.86021	17.6553
T068455	CAT1433.2	-0.1108	0.42	0.993917	878.392	1040.16
T141420	CAT1900	-0.1114	0.42	0.993917	2.51624	4.5547
T064081	CAT1397	0.1104	0.42	0.993917	92.8063	265.953
T120907	LSCAT134	0.0985	0.42	0.993917	6.96511	15.5168
T025981	OVAT115	-0.1148	0.42	0.993917	1.63606	3.21894
T379236	CAT2308.1	0.1132	0.42	0.993917	2.61808	4.98437
T300038	HCG15	0.1136	0.42	0.993917	36.8154	85.3943
T321693	CAT927	0.1007	0.42	0.993917	7.17347	15.6549
T161148	LSCAT206.1	0.1094	0.42	0.993917	5.51012	14.9337
T041731	CAT1259.3	0.1083	0.42	0.993917	33.8499	61.41
T307589	CAT835	0.1046	0.42	0.993917	73.7939	109.593
T179108	THCAT562	0.1022	0.42	0.993917	2.68369	4.87791
T012264	CAT59	0.1127	0.42	0.993917	52.765	72.2409
T104463	KCCAT434	0.116	0.42	0.993917	2.50083	5.57442
T031790	CAT175.2	0.1044	0.42	0.993917	17.134	22.823
T077424	THCAT241	-0.116	0.42	0.993917	58.8593	89.299
T117964	CAT1763	0.117	0.42	0.993917	7.50638	18.422
T195247	CAT280	0.1071	0.42	0.993917	2.61468	6.4181
T216115	CAT2155	0.1111	0.42	0.993917	5.85512	14.6428
T275568	AMAT84	0.1073	0.43	0.993917	20.8929	28.4578
T248987	LSCAT24.1	-0.1054	0.43	0.993917	6.93675	11.2488
T312723	CAT874.1	-0.1113	0.43	0.993917	5.76021	14.2256
T212172	CAT2137.1	0.1091	0.43	0.993917	106.949	145.983
T212862	UBOX5-AS1.2	0.1016	0.43	0.993917	10.075	16.303
T190151	CAT247	-0.1068	0.43	0.993917	420.339	550.811
T061741	AMAT78	-0.1038	0.43	0.993917	12.8556	17.5177
T037819	CAT1235.2	0.1064	0.43	0.993917	26.492	48.1592
T379265	CAT2309.1	-0.1101	0.43	0.993917	3.05183	31.2211
T332773	GBAT16	0.1039	0.43	0.993917	96.3871	146.135
T261947	CAT521	-0.1111	0.43	0.993917	67.4038	98.425
T301687	PRCAT15.2	-0.1102	0.43	0.993917	238.576	320.29
T233440	CAT2245	0.106	0.43	0.993917	12.7488	20.2734
T048489	KCCAT62	0.1123	0.43	0.993917	1.94831	3.74427
T294686	CAT751	-0.1223	0.43	0.993917	2.37911	11.2082
T099578	MCF2L-AS1.1	-0.1047	0.43	0.993917	63.2865	114.977
T175544	THCAT268	0.101	0.43	0.993917	7.82577	12.5829
T321490	CAT922	0.094	0.43	0.993917	26.6809	38.5758
T081209	CAT1534.2	0.1022	0.43	0.993917	49.1482	102.761
T075537	KHCAT435	-0.1072	0.43	0.993917	2.44423	5.08341
T170306	KHCAT148	-0.1154	0.43	0.993917	253.623	483.315
T354522	KHCAT72	-0.1065	0.43	0.993917	3.45579	8.39523
T248459	THCAT412	-0.1168	0.43	0.993917	2.25963	5.40789
T119211	ADPGK-AS1.2	0.102	0.43	0.993917	19.572	26.064
T099198	SMAT2	0.1091	0.43	0.993917	83.9643	139.439
T290658	CAT727	0.1046	0.43	0.993917	10.7364	20.4619
T315255	KCCAT126	-0.1	0.43	0.993917	11.0234	20.3268
T244137	THCAT531	0.105	0.43	0.993917	18.2161	47.056
T069499	CAT1438.2	-0.1142	0.43	0.993917	16.7175	26.365
T058954	CAT1357	-0.1095	0.43	0.993917	5.17569	10.0339
T359271	CAT1145.1	0.1081	0.43	0.993917	11.56	29.1051
T226898	KCCAT575	0.1097	0.43	0.993917	3.30639	7.99199
T127323	CAT1817	0.1083	0.43	0.993917	21.5032	38.1925
T171273	CAT2082.4	0.1063	0.43	0.993917	70.9759	91.5285
T148925	CAT1941.2	0.1015	0.43	0.993917	18.2621	36.3293
T298538	CAT777	-0.1179	0.43	0.993917	16.3324	44.957
T144378	CAT1916	0.1021	0.43	0.993917	132.224	191.123
T046571	ENTPD1-AS1.5	0.1142	0.43	0.993917	12.8469	21.7948
T302963	LSCAT252	-0.1116	0.43	0.993917	15.8099	23.4644
T272256	KHCAT423	-0.1076	0.43	0.993917	17.2778	24.6585
T190747	CAT253.3	0.1072	0.43	0.993917	78.4316	121.339
T149738	HOXB-AS2.2	0.1169	0.43	0.993917	58.6742	140.643
T216399	OVAT87	0.108	0.44	0.993917	21.934	33.9044
T363301	CAT1171	0.1039	0.44	0.993917	11.4303	43.4445
T191060	AMAT107	-0.1068	0.44	0.993917	12.5713	16.6982
T181773	ZNF667-AS1.3	-0.1054	0.44	0.993917	14.9978	39.9381
T232440	KCCAT65	0.1039	0.44	0.993917	20.2452	33.2663
T249270	CAT439	0.0956	0.44	0.993917	112.73	157.117
T043670	PRCAT183.2	0.1014	0.44	0.993917	2.60797	5.27662
T137234	CAT1880	0.1012	0.44	0.993917	19.9686	53.2068
T002820	CAT14.2	0.101	0.44	0.993917	14.9857	35.8417
T348924	THCAT613	-0.093	0.44	0.993917	17.8432	23.4059
T219512	PRCAT301	0.1104	0.44	0.993917	2.75827	10.3678
T296014	KCCAT522	0.094	0.44	0.993917	7.25307	11.6252
T235524	CAT2259.2	0.1009	0.44	0.993917	30.2359	56.5048
T165113	LSCAT118	-0.1065	0.44	0.993917	7.01752	12.3468
T188298	KHCAT276	0.106	0.44	0.993917	2.7975	13.3711
T141976	CAT1906	0.1019	0.44	0.993917	5.28369	13.2244
T348141	CAT1067.2	-0.1039	0.44	0.993917	6.12129	11.295
T178055	CAT2119	0.1051	0.44	0.993917	5.18467	14.3289
T116847	CAT1746	0.1007	0.44	0.993917	32.3218	50.0857
T150560	LACAT270	-0.1	0.44	0.993917	363.582	438.676
T229304	AMAT95	-0.105	0.44	0.993917	114.904	462.699
T307711	OVAT137	-0.1077	0.44	0.993917	9.04524	18.0374
T293467	KCCAT4	-0.1097	0.44	0.993917	12.3056	47.9657
T045004	LINC00857.2	0.1103	0.44	0.993917	58.2319	116.622
T012930	CAT65.3	-0.1154	0.44	0.993917	2.97287	6.31216
T240634	ENTPD3-AS1.2	0.1035	0.44	0.993917	54.3155	70.5699
T240632	ENTPD3-AS1.3	0.1035	0.44	0.993917	54.3155	70.5699
T112050	MBAT74	0.1008	0.44	0.993917	38.8383	210.816
T217216	CAT2164.1	0.1041	0.44	0.993917	208.696	421.556
T340308	CAT1010	0.0985	0.44	0.993917	9.27792	16.3722
T340537	KCCAT88	0.1032	0.44	0.993917	2.60979	4.67186
T249720	CAT442	0.0927	0.44	0.993917	21.0804	44.4725
T039445	GBAT14	0.1115	0.44	0.993917	1.59352	3.67219
T365359	CAT1186.2	0.0999	0.44	0.993917	95.6375	267.914
T249283	KCCAT5	0.1006	0.44	0.993917	2.62014	12.5324
T075922	THCAT205	-0.0955	0.44	0.993917	9.3795	14.5337
T129850	AMAT124	0.1057	0.44	0.993917	6.12444	9.42693
T350589	FAM83A-AS1.3	0.1129	0.44	0.993917	27.1947	273.555
T004371	HNCAT96	0.1157	0.44	0.993917	3.27809	8.7518
T075756	LSCAT43	0.0974	0.44	0.993917	75.202	134.77
T027939	IPO9-AS1	0.1044	0.44	0.993917	18.6823	22.8036
T184513	AMAT12	-0.106	0.44	0.993917	51.483	67.3221
T378582	CAT2300	0.1076	0.44	0.993917	33.2457	68.5236
T214546	KCCAT528	0.1077	0.44	0.993917	10.7184	20.9566
T252422	THCAT508	-0.0991	0.44	0.993917	25.746	37.4323
T259778	NOP14-AS1.2	-0.104	0.44	0.993917	13.1889	20.3531
T191973	BOLA3-AS1	-0.0919	0.44	0.993917	106.29	206.44
T024481	HICLINC23	-0.1054	0.44	0.993917	2.22088	7.08913
T139945	KHCAT405	0.1057	0.45	0.993917	3.26055	12.6045
T375533	KHCAT113	0.1034	0.45	0.993917	240.102	371.666
T014702	KCCAT314	-0.0963	0.45	0.993917	15.3911	27.7075
T171443	BRCAT60	-0.0926	0.45	0.993917	15.7858	30.2639
T163562	CAT2029.2	0.0976	0.45	0.993917	41.0688	94.6299
T219475	ZFAS1.3	-0.1079	0.45	0.993917	324.494	416.333
T010079	CAT42.2	-0.1016	0.45	0.993917	3.24099	5.98042
T331686	CAT967	0.101	0.45	0.993917	27.2503	45.2814
T045739	AMAT22	0.0977	0.45	0.993917	31.2961	40.3235
T061554	CAT1375.2	0.0937	0.45	0.993917	53.036	81.5338
T037820	CAT1235.1	0.107	0.45	0.993917	706.048	1334.49
T032687	PRCAT164	-0.1049	0.45	0.993917	11.5184	20.3251
T353734	CAT1118	0.1049	0.45	0.993917	12.7269	19.1313
T301883	CAT791	-0.101	0.45	0.993917	167.579	241.245
T075418	THCAT466	-0.1148	0.45	0.993917	5.01889	13.2314
T005018	THCAT621	-0.1048	0.45	0.993917	303.25	444.771
T168785	CAT2066	-0.1054	0.45	0.993917	9.59956	24.0628
T146597	CAT1928	-0.0962	0.45	0.993917	846.64	1013.86
T118006	CAT1764.3	-0.11	0.45	0.993917	38.4938	51.4135
T087151	THCAT204	0.1025	0.45	0.993917	19.5251	26.0856
T064634	AMAT36	-0.0993	0.45	0.993917	35.0381	47.3448
T119122	AMAT41	0.0964	0.45	0.993917	19.2347	27.9095
T369399	SNHG7.2	0.1024	0.45	0.993917	864.837	1305.59
T029615	MIR205HG.3	0.1026	0.45	0.993917	33.5708	73.2467
T021661	UBE2Q1-AS1	-0.099	0.45	0.993917	30.7221	46.8314
T159902	LACAT264	0.1113	0.45	0.993917	2.57892	7.53571
T154947	PNAT127	0.0972	0.45	0.993917	91.8112	178.742
T302911	THCAT595	0.101	0.45	0.993917	4.21184	6.78718
T198572	CAT307	0.102	0.45	0.993917	13.8588	22.488
T231513	MBAT2	-0.1047	0.45	0.993917	5.27379	7.25093
T159666	CAT2005.1	0.0995	0.45	0.993917	21.1895	37.0677
T166625	KCCAT82.2	-0.108	0.45	0.993917	42.3207	65.1867
T059479	KCCAT72	-0.1128	0.45	0.993917	7.71187	14.8815
T079492	CAT1524.1	0.0976	0.45	0.993917	30.3722	86.5393
T359969	THCAT277	0.1144	0.45	0.993917	15.7663	21.3502
T241512	LIMD1-AS1.1	-0.098	0.45	0.993917	461.164	649.303
T026485	CAT143	0.0999	0.45	0.993917	7.74492	12.6021
T158433	KCCAT621	-0.1126	0.45	0.993917	117.144	190.945
T180296	CAT2127.1	-0.1198	0.45	0.993917	527.814	806.296
T129703	KCCAT172	-0.1028	0.45	0.993917	26.0801	40.4585
T239058	CAT392	0.1039	0.45	0.993917	6.17768	17.1701
T196772	MIR4435-1HG.8	-0.1119	0.45	0.993917	17.0505	40.2737
T318485	CAT903	-0.1047	0.45	0.993917	206.257	377.779
T118072	HRAT11	0.1033	0.45	0.993917	6.79756	14.075
T337241	CAT1000	-0.0975	0.45	0.993917	27.5134	40.3851
T129950	CAT1841.4	0.0993	0.45	0.993917	6853.04	9275.34
T127415	LACAT239	0.0981	0.45	0.993917	10.3634	22.2602
T068927	BRCAT321	0.0995	0.45	0.993917	112.773	171.217
T116657	LSCAT62	0.1011	0.45	0.993917	24.7872	40.3862
T299155	CAT781	0.1053	0.45	0.993917	99.8156	284.371
T366126	KCCAT587	0.0965	0.45	0.993917	58.5929	83.126
T153648	LINC00511.9	0.1056	0.45	0.993917	91.9228	146.891
T115222	KHCAT146	-0.1099	0.46	0.993917	75.3037	96.3667
T166615	CAT2048	-0.1007	0.46	0.993917	18.9349	27.0807
T364173	CAT1177.1	0.105	0.46	0.993917	10.1025	17.1735
T184450	CAT211.2	-0.1021	0.46	0.993917	11.0703	15.9229
T104896	CAT1668	0.0944	0.46	0.993917	6.46296	10.472
T008594	CAT36	0.0992	0.46	0.993917	101.082	213.258
T295685	LACAT77	-0.1037	0.46	0.993917	8.66863	26.5412
T157162	AMAT144	-0.0985	0.46	0.993917	5.03941	9.91053
T319903	KCCAT428	0.102	0.46	0.993917	12.7085	30.0822
T347841	THCAT182	-0.0959	0.46	0.993917	79.9332	98.4485
T252250	KCCAT227	0.0958	0.46	0.993917	13.231	23.4443
T042721	CAT1267	0.0993	0.46	0.993917	132.39	210.949
T097739	PRCAT103	0.1064	0.46	0.993917	2.75976	5.44287
T184099	CAT204	-0.0975	0.46	0.993917	28.1265	73.0218
T110171	CAT1702	0.0959	0.46	0.993917	9.05466	16.6377
T073381	LINC00987	-0.1024	0.46	0.993917	49.4739	90.349
T005000	ESAT117	-0.1055	0.46	0.993917	731.056	888.042
T251101	CAT453.2	-0.1068	0.46	0.993917	42.0014	47.9352
T255842	CAT480.2	-0.0908	0.46	0.993917	426.011	538.134
T122187	CAT1785	-0.1041	0.46	0.993917	355.165	479.34
T196790	CAT295.2	0.0887	0.46	0.993917	81.3731	137.614
T256697	BRCAT378	0.0963	0.46	0.993917	134.272	260.525
T296469	THCAT563	0.1027	0.46	0.993917	21.4876	36.4651
T114694	UTAT18	0.0958	0.46	0.993917	42.9962	63.0286
T014435	CAT74	0.11	0.46	0.993917	34.9363	47.8603
T108902	THCAT329	0.0929	0.46	0.993917	2.47782	3.93447
T302620	AMAT44	-0.1068	0.46	0.993917	70.8434	94.8784
T075655	CAT1486	0.0958	0.46	0.993917	23.9731	34.7685
T042582	MEAT134	0.0975	0.46	0.993917	12.3913	22.3649
T045002	LINC00857.1	0.101	0.46	0.993917	90.9461	142.454
T313198	LACAT220	-0.1071	0.46	0.993917	1.9383	3.38695
T049892	CAT1314	-0.1115	0.46	0.993917	10.8829	24.6733
T048439	CAT1301	0.0953	0.46	0.993917	62.9879	84.5074
T275948	CAT626	0.1031	0.46	0.993917	1.90866	3.71444
T141772	LVCAT40	-0.0993	0.46	0.993917	173.422	225.379
T318488	CAT904.6	-0.1019	0.46	0.993917	167.035	231.618
T168610	CAT2065	-0.1136	0.46	0.993917	41.3849	99.371
T227255	CAT2216.2	0.0999	0.46	0.993917	38.5722	78.7616
T253002	CAT459.1	-0.0976	0.46	0.993917	6.91444	27.7949
T083984	CAT1559.2	0.1053	0.46	0.993917	186.936	242.824
T226959	CAT2213.4	0.0959	0.46	0.993917	40.2025	215.516
T086204	HNCAT253	0.1046	0.46	0.993917	16.7812	28.3853
T074576	KCCAT67	0.0967	0.46	0.993917	66.5192	91.3257
T081323	OVAT81	-0.1068	0.46	0.993917	27.2793	39.5464
T184399	BRCAT37	-0.1126	0.46	0.993917	8.70342	19.8156
T331376	LSCAT78	0.1	0.47	0.993917	2.64554	4.54797
T061397	CAT1374.1	-0.1085	0.47	0.993917	6.48597	10.918
T224837	MBAT71	0.0896	0.47	0.993917	13.3268	22.2004
T164137	LINC00909.2	0.0988	0.47	0.993917	84.0206	132.853
T248563	CAT434	0.0956	0.47	0.993917	64.6774	130.601
T117615	CAT1759.2	0.1041	0.47	0.993917	8.88088	16.0395
T079649	CAT1525	0.1032	0.47	0.993917	116.141	313.82
T039153	CAT1245.1	-0.1065	0.47	0.993917	35.4187	54.091
T161783	CAT2015	-0.0934	0.47	0.993917	15.3602	19.5592
T193444	LINC00152.1	0.1026	0.47	0.993917	28.5146	54.1629
T078885	CAT1520.1	-0.103	0.47	0.993917	661.781	1013.34
T296035	KCCAT497	-0.0971	0.47	0.993917	82.7653	133.503
T274020	BRCAT336	-0.1029	0.47	0.993917	31.5092	56.9308
T226026	LSCAT270	-0.0947	0.47	0.993917	8.11533	12.7917
T044199	CAT1278	0.0914	0.47	0.993917	23.5125	36.0043
T106281	KHCAT294	-0.0995	0.47	0.993917	11.6745	140.582
T093553	CAT1603.1	0.0978	0.47	0.993917	9.24739	18.2363
T370941	LVCAT80	0.1122	0.47	0.993917	9.87925	31.0826
T036557	UTAT40	-0.0973	0.47	0.993917	647.831	808.942
T028139	PCAT6	-0.0892	0.47	0.993917	35.1049	58.9155
T061844	CAT1377	0.0944	0.47	0.993917	110.474	150.321
T092712	STCAT14	-0.0922	0.47	0.993917	5.92281	17.4177
T360604	CAT1155	0.0971	0.47	0.993917	6.35655	14.2326
T322061	LINC00265.3	0.1015	0.47	0.993917	153.45	201.575
T201904	CAT323	-0.1012	0.47	0.993917	51.4115	75.3338
T127212	CAT1816	0.0954	0.47	0.993917	595.151	864.885
T355726	CAT1131	0.1014	0.47	0.993917	2.94422	4.14093
T298225	LACAT200	-0.0889	0.47	0.993917	4.99593	6.23599
T264753	HNCAT271	-0.0925	0.47	0.993917	74.7604	106.854
T006958	OVAT126	-0.1104	0.47	0.993917	2.85669	5.19796
T111199	CAT1706	0.0935	0.47	0.993917	26.8911	46.121
T073783	CAT1470	0.102	0.47	0.993917	2.98347	10.9755
T351931	AMAT145	0.0994	0.47	0.993917	4.67932	8.79446
T044398	HICLINC242.2	-0.1035	0.47	0.993917	2.76122	5.83617
T309376	CMAT40	0.0967	0.48	0.993917	50.3552	67.6595
T333158	KCCAT177	-0.0895	0.48	0.993917	16.3422	21.9522
T039355	CAT1246	-0.0964	0.48	0.993917	12.193	16.6314
T167528	CAT2057	-0.106	0.48	0.993917	2.25363	5.09048
T002199	THCAT102	0.0921	0.48	0.993917	47.0331	83.77
T268032	CAT573.1	-0.0922	0.48	0.993917	31.358	58.4553
T232833	HNCAT71.1	0.0969	0.48	0.993917	14.5754	19.3972
T127967	LVCAT27	-0.0971	0.48	0.993917	2.65701	3.35037
T166140	KHCAT247	-0.1007	0.48	0.993917	0.147246	1.71114
T075536	CAT1483	0.0925	0.48	0.993917	2.5565	4.86184
T109097	MBAT98	0.0965	0.48	0.993917	11.0366	17.0001
T015544	CAT80.2	0.105	0.48	0.993917	90.6118	128.942
T029800	SERTAD4-AS1.2	-0.0914	0.48	0.993917	27.9193	49.3586
T266581	CAT557	-0.1012	0.48	0.993917	13.6435	35.176
T340296	BRCAT340	0.0941	0.48	0.993917	48.3632	72.0532
T122189	CAT1786	-0.1008	0.48	0.993917	31.3391	36.069
T151136	KHCAT122	-0.0909	0.48	0.993917	124.176	179.624
T343733	CAT1038	-0.097	0.48	0.993917	70.2645	104.913
T030047	AMAT88	0.0956	0.48	0.993917	30.114	45.1157
T125816	HNCAT156	0.0962	0.48	0.993917	18.0641	28.6209
T323267	PNAT115	-0.0903	0.48	0.993917	19.7742	26.3824
T297979	CAT774	-0.1014	0.48	0.993917	15.7089	26.7769
T307190	CAT830	0.091	0.48	0.993917	30.995	44.7137
T106678	KCCAT552	-0.0984	0.48	0.993917	7.21823	15.4695
T170397	CAT2076	-0.0971	0.48	0.993917	26.4657	37.8086
T274966	CAT609	-0.0903	0.48	0.993917	26.587	51.5907
T277455	HNCAT55	0.0931	0.48	0.993917	93.2762	197.713
T377475	KCCAT280	0.0913	0.48	0.993917	12.4585	17.7127
T015057	MBAT91.1	-0.0917	0.48	0.993917	22.8811	114.507
T311861	CAT865	0.097	0.48	0.993917	4.40823	13.6749
T317639	SMAT28	-0.0931	0.48	0.993917	79.0806	118.709
T340385	CAT1011	0.0929	0.48	0.993917	154.148	211.319
T247070	HNCAT19	0.0919	0.48	0.993917	46.4608	73.8984
T335777	CAT995	0.0909	0.48	0.993917	3.74232	6.53605
T363206	THCAT539	-0.102	0.48	0.993917	11.8662	17.1352
T297773	MPAT11	0.0884	0.48	0.993917	24.5001	59.5799
T266952	BRCAT401	0.0936	0.48	0.993917	14.5841	36.3405
T351742	KCCAT622	0.0921	0.48	0.993917	16.7739	39.6827
T073806	CAT1471	0.0893	0.48	0.993917	28.0461	39.8868
T216117	CAT2156	0.1011	0.48	0.993917	11.8062	30.1656
T019169	PRCAT150	0.0955	0.48	0.993917	128.398	194.846
T244245	CAT414	-0.0995	0.48	0.993917	8.56192	29.5008
T081837	HICLINC281	-0.0922	0.48	0.993917	52.614	79.7248
T234591	CAT2253.1	0.0889	0.49	0.993917	12.4413	22.8146
T253312	CAT464	-0.0946	0.49	0.993917	127.804	168.948
T038492	CAT1242.1	-0.1079	0.49	0.993917	16.8953	42.1845
T287545	CAT701.1	-0.0994	0.49	0.993917	24.4917	36.5009
T114645	CAT1726	0.0924	0.49	0.993917	143.285	202.463
T157160	AMAT161	-0.1003	0.49	0.993917	3.73502	7.75506
T320000	CVAT6	-0.0975	0.49	0.993917	17.8287	42.914
T088556	KCCAT416	0.094	0.49	0.993917	28.6439	43.1289
T189689	AMAT18	-0.0942	0.49	0.993917	13.3922	16.7174
T081547	AMAT29	-0.092	0.49	0.993917	180.038	299.154
T135024	CAT1868	-0.0943	0.49	0.993917	33.1769	48.3103
T314152	AMAT113	0.0934	0.49	0.993917	10.0086	14.6397
T047176	KHCAT94	0.0889	0.49	0.993917	2.78597	4.24411
T330614	LINC01004.2	0.1045	0.49	0.993917	8.05012	15.2063
T052266	MIR210HG.1	0.0919	0.49	0.993917	210.007	342.778
T282454	CAT663	-0.0906	0.49	0.993917	22.8908	31.8067
T234101	LSCAT230	0.0958	0.49	0.993917	16.0147	45.3033
T135745	CAT1870	-0.0969	0.49	0.993917	11.0656	21.9777
[truncated: 2,323 more rows]

## Sheet: BRCA
Transcript ID	Name	Cox coefficient	Raw p-value	BH-adjusted p-value	Median Expression	Mean Expression	Cox model: coxph(Surv(times,died) ~ lncrna + ductal + metaplastic + mucinous + medullary + lobular + sex + age)
T099580	MCF2L-AS1.2	-0.3694	0.00044	0.642	41.7817	62.2267
T354706	CAT1125.4	0.3433	0.00067	0.642	26.298	45.4792
T347199	CAT1060	0.3297	0.0013	0.642	4.46771	8.98375
T181772	ZNF667-AS1.4	-0.3036	0.0013	0.642	276.539	534.268
T163295	CAT2028	-0.3271	0.0014	0.642	48.0283	63.1835
T020857	GBAT2	-0.3311	0.0014	0.642	20.3479	28.9627
T344583	CAT1049.1	-0.344	0.0014	0.642	11.1319	24.0788
T042079	LACAT267	0.2978	0.0015	0.642	9.83209	21.4874
T117110	CAT1750	0.3083	0.0018	0.642	800.295	1417.13
T331729	ST7-AS1	-0.318	0.0019	0.642	53.6873	72.6094
T270748	PRCAT75.2	-0.333	0.002	0.642	5.01419	13.9021
T117111	CAT1751	0.3101	0.002	0.642	804.547	1379.46
T092417	LINC00398	-0.3161	0.0023	0.642	15.2001	25.9195
T032504	CAT182.1	0.276	0.0024	0.642	240.341	331.493
T065337	CAT1405	-0.2947	0.0025	0.642	54.2553	84.4516
T225716	HNCAT227	0.2762	0.0028	0.642	51.9903	127.278
T074477	CAT1478	-0.2763	0.0029	0.642	249.759	729.149
T068455	CAT1433.2	-0.3059	0.0029	0.642	440.655	739.559
T346493	KCCAT199	-0.278	0.003	0.642	38.6163	95.1322
T303621	CAT802	-0.2968	0.003	0.642	50.6862	70.6378
T029617	MIR205HG.2	-0.3284	0.003	0.642	13.6103	38.8026
T168610	CAT2065	-0.3037	0.003	0.642	39.6414	70.7737
T355828	CAT1134.1	0.2768	0.0035	0.664659	13.8588	54.421
T295444	TRIM52-AS1.2	-0.2935	0.0035	0.664659	22.0202	29.8979
T016778	OVAT148	-0.2708	0.0038	0.664659	6.40383	10.7579
T123512	SPATA41	-0.3003	0.004	0.664659	21.285	36.7224
T233878	CAT2249	-0.2741	0.0041	0.664659	65.1703	86.7077
T029619	MIR205HG.4	-0.2865	0.0043	0.664659	201.63	503.062
T263868	CAT539	-0.2819	0.0043	0.664659	175.59	228.969
T129703	KCCAT172	-0.2753	0.0044	0.664659	28.2469	43.3883
T029962	BRCAT130	-0.3178	0.0045	0.664659	5.76638	11.443
T154153	CAT1978	0.2768	0.0047	0.664659	14.2033	19.4971
T213910	THCAT536	0.2706	0.0048	0.664659	6.40462	9.05237
T378917	CAT2305	-0.2668	0.0048	0.664659	12.3528	30.0557
T011932	CAT57.2	-0.295	0.005	0.672571	21.039	40.9911
T346505	CAT1056	-0.272	0.0052	0.674389	15.153	34.1119
T014947	CAT76.1	-0.2824	0.0053	0.674389	24.4602	43.2134
T336139	PRKAG2-AS1	-0.2682	0.0056	0.688092	95.9443	142.068
T129132	CAT1830	-0.2706	0.0057	0.688092	54.8499	80.812
T162541	CAT2020.3	0.264	0.006	0.689777	1.54459	2.8395
T043711	CAT1274	-0.2629	0.0061	0.689777	56.6233	71.9785
T156261	BAIAP2-AS1.2	-0.2777	0.0062	0.689777	1488.52	1799
T020193	OVAT12	-0.2558	0.0063	0.689777	40.8728	62.4233
T342967	CAT1035.1	-0.2697	0.0067	0.711431	11.358	31.8505
T081648	CAT1541	0.2677	0.0068	0.711431	6.76334	9.95463
T081660	THCAT19	0.2755	0.0075	0.745433	2.3372	4.59869
T356846	KCCAT303	-0.2759	0.0075	0.745433	7.61043	10.935
T017274	KCCAT591	-0.2688	0.0076	0.745433	9.22675	15.6225
T098079	DOCK9-AS2	-0.2775	0.0079	0.759045	46.8391	66.764
T234606	CAT2254.1	-0.2514	0.0087	0.784667	24.5248	57.9139
T166222	CAT2045.4	-0.2611	0.0092	0.784667	6.12825	8.70316
T160908	CAT2013	-0.259	0.0095	0.784667	293.808	393.749
T036220	CAT1220	-0.288	0.0095	0.784667	3.06664	6.02475
T002820	CAT14.2	-0.256	0.0096	0.784667	22.2573	39.01
T360019	CAT1150	-0.2978	0.0098	0.784667	4.57897	60.7178
T085537	CAT1564	-0.242	0.01	0.784667	12.257	16.4221
T050959	LINC00959	-0.2441	0.01	0.784667	71.7901	94.6573
T050343	AMAT80	-0.233	0.01	0.784667	40.1379	50.5213
T114704	CAT1727	0.2468	0.01	0.784667	20.8127	33.2369
T363042	CAT1168.1	-0.2519	0.011	0.784667	39.6361	50.8097
T233872	KCCAT92	-0.2411	0.011	0.784667	28.754	44.3333
T258634	CAT503	0.2449	0.011	0.784667	53.7642	81.021
T278745	KCCAT706	-0.2631	0.011	0.784667	12.573	21.0768
T201518	CMAT2	-0.2513	0.011	0.784667	6.73364	13.0502
T028137	CAT152.2	-0.2571	0.011	0.784667	102.217	182.147
T003422	CAT18.2	-0.2526	0.011	0.784667	10.3689	13.5639
T309954	CAT855	-0.2591	0.012	0.792436	3.66602	5.78382
T298886	KCCAT283	-0.2454	0.012	0.792436	5.42348	11.0033
T218917	CAT2172	0.2466	0.012	0.792436	10.9145	24.2228
T334375	MEAT138	-0.2461	0.013	0.792436	10.0952	15.5039
T297391	CAT769	-0.2539	0.013	0.792436	8.60556	13.4365
T252454	SIAH2-AS1	-0.2393	0.013	0.792436	128.719	266.729
T086012	USP30-AS1	-0.2345	0.013	0.792436	27.3686	52.6907
T018603	CAT99.3	0.2308	0.013	0.792436	71.8381	95.881
T290421	HICLINC142.1	0.2525	0.013	0.792436	6.02662	12.5317
T060210	THCAT226	-0.2341	0.014	0.792436	42.7493	54.2496
T075837	LACAT143	0.2361	0.014	0.792436	7.58653	10.3013
T305255	OVAT19	-0.2427	0.014	0.792436	178.719	363.434
T233410	KCCAT420	-0.2256	0.014	0.792436	12.2088	16.9016
T003426	CAT18.1	-0.2366	0.014	0.792436	10.9644	15.0999
T332760	KCCAT6	0.2393	0.015	0.792436	44.3354	64.4066
T109441	LVCAT75	-0.2474	0.015	0.792436	4.758	18.4671
T326436	CAT945.1	-0.248	0.015	0.792436	81.8709	142.768
T036012	LINC00702.2	0.2302	0.016	0.792436	68.984	111.587
T229041	DGCR5.2	-0.2443	0.016	0.792436	23.6292	44.0877
T337673	CAT1002.1	-0.2411	0.016	0.792436	60.6954	84.6
T380698	CAT2317	-0.2348	0.017	0.792436	9.61401	16.8963
T012546	CAT63.1	-0.253	0.017	0.792436	64.0878	98.7772
T293576	BRCAT230.1	-0.2702	0.017	0.792436	3.84896	13.2081
T244137	THCAT531	-0.2441	0.017	0.792436	28.1479	62.8734
T342965	CAT1035.2	-0.2315	0.017	0.792436	55.3159	137.285
T038491	CAT1242.2	-0.2365	0.018	0.792436	33.4868	61.6267
T075833	CAT1487	0.2379	0.018	0.792436	29.4378	39.0299
T183922	CAT200	-0.2437	0.018	0.792436	14.6031	31.8567
T073381	LINC00987	-0.2355	0.018	0.792436	58.8614	104.955
T029621	MIR205HG.7	-0.2394	0.018	0.792436	129.224	317.626
T161474	LVCAT22	-0.2266	0.019	0.792436	10.1999	19.0854
T363113	THCAT513	0.2244	0.019	0.792436	14.6475	19.5814
T191200	THCAT609	0.2152	0.019	0.792436	352.628	440.494
T328387	CAT956	-0.269	0.02	0.792436	6.46508	32.7783
T019192	THCAT320	-0.2163	0.021	0.792436	97.1992	136.584
T295574	CAT758	-0.22463	0.021	0.792436	43.6076	94.3328
T321689	CAT926	-0.2317	0.021	0.792436	30.2717	48.3132
T376712	CAT2291	-0.2251	0.021	0.792436	47.9	104.86
T202907	CAT326	-0.233	0.021	0.792436	204.084	268.017
T023556	KCCAT489	-0.2297	0.021	0.792436	6.48048	14.8346
T170655	CAT2080.2	-0.2479	0.021	0.792436	2.99745	5.03886
T284251	LSCAT89	-0.2342	0.021	0.792436	2.41718	4.85865
T037129	AMAT142	-0.2259	0.021	0.792436	3.81361	6.16246
T273276	CAT598.1	-0.2289	0.021	0.792436	6.23162	15.7518
T086284	HICLINC286	-0.2471	0.021	0.792436	2.63729	4.20102
T098325	FGF14-IT1	-0.2274	0.022	0.792436	42.3262	71.4994
T306349	LINC00472.1	-0.2245	0.022	0.792436	85.5241	203.849
T016624	CAT86	-0.2256	0.022	0.792436	114.468	144.455
T189916	CAT243	-0.2267	0.022	0.792436	57.5258	107.534
T286786	CAT695	0.2239	0.022	0.792436	1.6999	7.46187
T148887	KCCAT216	-0.2137	0.023	0.792436	22.3815	34.7757
T014949	CAT76.2	-0.237	0.023	0.792436	14.6881	24.2943
T006219	THCAT351	-0.2141	0.024	0.792436	63.9146	83.6233
T345303	AMAT120	-0.2252	0.024	0.792436	5.9368	9.41256
T363360	ESAT8.2	-0.2441	0.024	0.792436	4.38255	7.38581
T050472	CAT1317.2	-0.2054	0.025	0.792436	17.0596	26.1452
T058451	CAT1355	-0.2388	0.025	0.792436	168.985	226.875
T002825	CAT14.1	-0.2286	0.025	0.792436	13.1647	25.6256
T044117	KHCAT369	-0.2166	0.025	0.792436	45.3329	72.7453
T116764	LSCAT151	0.2147	0.025	0.792436	10.5997	16.0544
T152680	CAT1967.2	-0.223	0.025	0.792436	28.2607	45.4733
T132673	CAT1854.2	-0.2154	0.025	0.792436	109.197	152.741
T119151	BRCAT276	0.209	0.025	0.792436	61.4839	80.0082
T321806	CAT929	0.2292	0.025	0.792436	2.33308	3.85941
T162496	CAT2019	0.2258	0.026	0.792436	56.952	156.934
T124670	CAT1800.1	-0.227	0.026	0.792436	80.8556	119.779
T296500	CAT763.1	-0.2301	0.026	0.792436	4.46692	9.47347
T109935	CAT1699	-0.23089	0.026	0.792436	37.1251	74.7409
T074277	LACAT158	0.2091	0.026	0.792436	3.61014	6.02242
T302347	AMAT141	-0.23543	0.026	0.792436	1.62418	2.49583
T167413	CAT2055	-0.2155	0.026	0.792436	10.2652	18.4845
T083987	KCCAT433	-0.2455	0.026	0.792436	1.73837	3.0347
T013953	CAT72	0.227	0.026	0.792436	18.4285	45.3031
T196783	MIR4435-1HG.2	0.2124	0.027	0.792436	29.5927	41.3698
T110182	OVAT5	-0.2329	0.027	0.792436	2.33766	3.53439
T154385	CAT1981	-0.2099	0.027	0.792436	22.9652	33.7795
T247548	LINC00882.2	-0.2182	0.027	0.792436	10.3766	16.1842
T317112	CAT897	0.2097	0.027	0.792436	19.8242	27.232
T288160	CAT707.1	0.2165	0.027	0.792436	59.7326	78.8367
T126159	CAT1812	-0.2111	0.028	0.792436	75.2607	108.913
T110055	KCCAT561	-0.2356	0.028	0.792436	4.5405	9.64905
T275646	CAT619.3	-0.2269	0.028	0.792436	6.38715	12.9641
T326435	CAT945.2	-0.2268	0.028	0.792436	11.5181	19.5768
T242781	CAT406.1	-0.2173	0.029	0.792436	81.531	97.7908
T263301	KCCAT459	-0.2191	0.029	0.792436	4.23992	9.25719
T226026	LSCAT270	0.2172	0.029	0.792436	4.33312	7.17928
T365884	BRCAT239	-0.2365	0.029	0.792436	10.3055	20.1597
T193510	CAT271	-0.2271	0.029	0.792436	33.7501	53.8163
T063079	LACAT40	0.2191	0.029	0.792436	6.85344	13.3118
T075418	THCAT466	-0.2204	0.03	0.792436	6.35705	9.98028
T006036	UTAT19	-0.208	0.03	0.792436	350.664	432.595
T233755	CAT2247.2	-0.2033	0.03	0.792436	164.714	193.369
T168220	CAT2062	-0.2132	0.03	0.792436	984.107	1544.58
T256582	CAT484	0.2195	0.03	0.792436	145.692	202.816
T351869	THCAT1.1	-0.2392	0.03	0.792436	12.1401	38.0589
T364581	CAT1179	-0.2211	0.031	0.792436	3.43807	4.7858
T294605	BRCAT5.1	0.21	0.031	0.792436	66.4785	177.344
T239205	MBAT70	-0.2256	0.031	0.792436	162.349	294.613
T335236	CAT991	-0.2144	0.031	0.792436	164.054	205.279
T075650	KHCAT207	-0.2258	0.031	0.792436	11.5135	23.2495
T115989	CAT1736.2	-0.2146	0.031	0.792436	27.9275	80.793
T098024	STK24-AS1	-0.2122	0.031	0.792436	12.4193	18.889
T369348	CAT1210	-0.233	0.031	0.792436	3.46261	5.52921
T081028	CAT1533	-0.2301	0.031	0.792436	54.2695	97.5905
T070188	CAT1441.2	-0.2318	0.031	0.792436	14.7436	20.5862
T081645	CAT1542.2	0.2194	0.032	0.792436	2.44221	3.65593
T136787	PRCAT153	0.2055	0.032	0.792436	4.27517	7.35116
T225540	AMAT121	-0.2156	0.032	0.792436	56.5223	99.6528
T031987	KCCAT586	-0.2402	0.032	0.792436	4.96091	12.6285
T147142	KCCAT553	-0.2263	0.032	0.792436	8.2903	16.8706
T275639	KHCAT184	0.1893	0.032	0.792436	89.1429	133.738
T123256	CAT1791.1	-0.2098	0.032	0.792436	50.3449	118.187
T048876	CAT1306	-0.21281	0.032	0.792436	7.79817	10.8471
T071280	CAT1452.2	-0.2235	0.032	0.792436	35.5153	44.6452
T196786	MIR4435-1HG.1	0.21243	0.033	0.792436	56.8812	93.3723
T216030	KHCAT9	-0.2293	0.033	0.792436	3.47372	8.1623
T238360	CAT387	0.211	0.033	0.792436	6.91104	34.8801
T201517	CMAT28	-0.2254	0.033	0.792436	2.74809	5.34728
T207212	CAT366.3	0.2097	0.033	0.792436	802.778	1290.21
T232829	HNCAT71.2	-0.2327	0.033	0.792436	13.3802	23.271
T012896	GNG12-AS1.3	-0.2182	0.033	0.792436	54.2237	76.7484
T177855	CAT2117.2	0.2179	0.033	0.792436	9.5017	21.5949
T353730	FAM83H-AS1.1	0.2068	0.034	0.792436	2241.31	3038.21
T375697	CMAT1	-0.2308	0.034	0.792436	9.78433	16.7539
T167661	KCCAT289	-0.2105	0.034	0.792436	5.7494	7.65672
T288849	KCCAT519	-0.214	0.034	0.792436	14.6246	20.8737
T078924	CAT1522.2	0.2171	0.034	0.792436	7.02528	27.5696
T191965	CAT264.1	0.1967	0.034	0.792436	413.282	545.78
T018107	KCCAT153	-0.2223	0.034	0.792436	10.0283	19.3528
T139443	CAT1890	-0.2097	0.034	0.792436	60.3022	86.9279
T032503	CAT182.2	0.2014	0.034	0.792436	362.866	478.479
T054093	CAT1333	-0.21	0.034	0.792436	9.03052	15.0025
T193457	LINC00152.4	0.1999	0.034	0.792436	144.931	180.678
T010553	FOXD2-AS1.1	0.209	0.034	0.792436	25.5732	47.2695
T252422	THCAT508	-0.1992	0.034	0.792436	42.1261	53.0401
T260556	CAT511.2	-0.2195	0.034	0.792436	15.6421	38.3939
T077374	CAT1501.5	-0.218	0.035	0.799903	666.45	1041.01
T252540	BRCAT423	-0.2394	0.035	0.799903	4.40635	9.9446
T261132	PRCAT286.2	-0.224	0.035	0.799903	4.74762	8.01957
T083661	HICLINC283.8	-0.2198	0.035	0.799903	24.6238	41.4335
T243187	CAT408	-0.2306	0.036	0.804283	11.4839	20.3995
T350231	CAT1089.1	0.1955	0.036	0.804283	44.5604	67.9904
T158109	CAT1996	-0.208	0.036	0.804283	25.3169	45.9955
T105978	CAT1680	-0.2106	0.036	0.804283	51.3699	64.8787
T216399	OVAT87	-0.2259	0.037	0.804283	19.5017	34.7314
T099578	MCF2L-AS1.1	-0.2129	0.037	0.804283	167.114	231.54
T107172	CAT1689	-0.1979	0.037	0.804283	47.3637	67.1681
T355068	CVAT7	-0.2171	0.037	0.804283	10.2568	18.5928
T187907	CAT231.1	-0.2113	0.037	0.804283	2.68661	20.4437
T148768	CAT1940	-0.1945	0.038	0.804283	37.775	50.4695
T274512	KCCAT18	0.214	0.038	0.804283	1.9647	3.18611
T206255	OVAT10.1	-0.1978	0.038	0.804283	37.584	45.4612
T041479	CAT1257.1	0.2138	0.038	0.804283	4.39589	7.98587
T071276	CAT1452.1	-0.2055	0.038	0.804283	537.646	690.77
T234605	CAT2254.2	-0.2027	0.038	0.804283	25.2254	57.9498
T181775	ZNF667-AS1.1	-0.1934	0.039	0.804283	13.0086	26.62
T158125	CAT1997	-0.2049	0.039	0.804283	10.0168	26.1043
T332197	BRCAT235	-0.2136	0.039	0.804283	57.4562	95.6542
T105568	CAT1675.1	-0.1936	0.039	0.804283	37.6223	51.9884
T233874	KCCAT180	-0.2093	0.039	0.804283	4.96426	7.76713
T196789	CAT295.1	0.1948	0.04	0.804283	56.1299	86.1121
T297166	CAT766.1	-0.20099	0.04	0.804283	20.3618	28.5534
T098602	LINC00460.1	-0.2085	0.04	0.804283	7.77181	20.1113
T019363	KCCAT554	-0.2139	0.04	0.804283	8.56699	12.2353
T139349	THCAT57	-0.2017	0.04	0.804283	19.0257	24.3219
T080860	CAT1532	-0.1907	0.04	0.804283	210.692	270.256
T299079	KPCAT13	-0.215	0.04	0.804283	18.5409	28.2501
T132564	CAT1853	-0.2133	0.04	0.804283	149.189	265.715
T275431	CAT617	-0.2081	0.041	0.804283	5.44109	18.9915
T272992	CAT597	-0.2028	0.041	0.804283	17.4107	24.4375
T156561	CAT1984	-0.2062	0.041	0.804283	1413.29	1732.72
T366967	CAT1200	0.2135	0.041	0.804283	64.6483	108.991
T187653	CAT230	-0.1963	0.041	0.804283	42.9104	61.9314
T365863	HNCAT154	-0.1803	0.041	0.804283	17.19	27.028
T005622	KCCAT477	-0.2203	0.042	0.809776	2.35205	5.4584
T048143	MEAT28	0.20295	0.042	0.809776	6.33834	10.5652
T190661	CAT252.2	-0.2041	0.042	0.809776	37.2702	50.4095
T243101	CAT407.2	-0.1953	0.042	0.809776	248.202	293.6
T103645	CAT1658	-0.1875	0.043	0.809776	18.5437	46.2735
T087732	KCCAT412	-0.1985	0.043	0.809776	9.18018	12.3372
T306350	LINC00472.2	-0.1993	0.043	0.809776	108.587	258.458
T140691	MIR497HG.1	-0.193	0.043	0.809776	44.2173	60.4025
T285218	CAT684	0.1983	0.043	0.809776	84.4873	129.526
T108991	HNCAT165	-0.2139	0.043	0.809776	2.51744	3.9935
T061702	OVAT47	-0.1993	0.044	0.815559	26.2844	36.5869
T002642	PNAT100	-0.1931	0.044	0.815559	9.29029	13.9766
T183159	PRCAT28.4	0.2109	0.044	0.815559	12.5827	33.1896
T325600	LINC00174	-0.1894	0.044	0.815559	144.398	203.438
T156253	BAIAP2-AS1.1	-0.1975	0.045	0.818783	205.667	275.833
T044729	BRCAT21.2	0.1864	0.045	0.818783	6.69615	19.4184
T114878	CAT1729.2	-0.192	0.045	0.818783	178.33	222.037
T247979	KCCAT192	-0.1922	0.045	0.818783	16.3346	33.2829
T159101	UTAT6	-0.1995	0.046	0.818783	30.8672	38.9721
T123654	CAT1795	-0.1911	0.046	0.818783	80.8965	121.926
T350234	CAT1089.3	0.19	0.047	0.818783	160.148	238.043
T331259	THCAT303	0.1959	0.047	0.818783	4.53148	10.1287
T306344	THCAT312	-0.2135	0.047	0.818783	13.7149	29.2799
T169170	CAT2069.1	-0.1889	0.047	0.818783	64.3584	117.027
T223627	CAT2191.1	-0.2071	0.047	0.818783	3.54135	9.52128
T223685	LINC00478.5	-0.2137	0.047	0.818783	4.82469	10.0498
T154635	OVAT92	-0.2018	0.047	0.818783	43.4171	59.9463
T040306	BRCAT425	0.1849	0.047	0.818783	17.739	25.9761
T027939	IPO9-AS1	-0.19	0.047	0.818783	23.1979	31.6516
T032330	CAT179	-0.2006	0.048	0.818783	259.343	426.559
T047958	CAT1299	-0.2001	0.048	0.818783	21.9192	34.0502
T239798	LSCAT276	0.1875	0.048	0.818783	99.8106	157.433
T076738	KHCAT445	-0.1972	0.048	0.818783	3.91948	7.44395
T176351	LIPE-AS1	-0.1898	0.048	0.818783	38.1592	70.0069
T166754	PRCAT273	-0.1898	0.048	0.818783	6.31231	11.2917
T152287	CAT1963	-0.1942	0.048	0.818783	34.2705	47.5404
T200420	CAT315	-0.191	0.049	0.820209	5.36834	9.77535
T151552	CAT1957.2	0.1959	0.049	0.820209	30.147	66.8039
T187906	CAT231.2	-0.1996	0.049	0.820209	3.93722	75.1474
T098795	CAT1631	-0.2086	0.05	0.820209	58.8978	98.6939
T137479	CAT1882	-0.2019	0.05	0.820209	31.0857	46.8265
T012930	CAT65.3	0.1949	0.05	0.820209	5.36524	9.36325
T118764	CAT1768.4	0.2106	0.05	0.820209	23.6507	63.1644
T164426	CAT2032	-0.1848	0.05	0.820209	81.2622	109.52
T127665	KHCAT39	-0.2219	0.05	0.820209	3.45959	5.5908
T283494	MAST4-AS1	-0.1995	0.05	0.820209	7.27865	11.9722
T348117	CAT1066	0.1822	0.05	0.820209	15.2631	24.2574
T126034	KCCAT35.2	-0.1957	0.051	0.822288	69.473	97.4563
T014837	KCCAT511	-0.2085	0.051	0.822288	2.38555	5.4792
T297390	CAT768	-0.1964	0.051	0.822288	15.5482	23.4715
T324407	CAT941.2	-0.1953	0.051	0.822288	9.80716	58.6676
T367347	BRCAT194	0.2014	0.051	0.822288	1.47139	2.31628
T018350	CAT97.1	-0.1795	0.052	0.822757	53.8358	68.4596
T232422	OVAT57	-0.193	0.052	0.822757	7.52303	10.5858
T137055	CAT1878.5	0.1915	0.052	0.822757	20.0754	38.994
T023138	BRCAT214.1	-0.201	0.052	0.822757	8.24429	23.3575
T018097	CAT95	-0.1883	0.053	0.822757	51.4621	104.721
T350239	MEAT150	0.1828	0.053	0.822757	8.24334	13.6363
T226889	THCAT440	-0.203	0.053	0.822757	14.9395	38.0669
T198162	CAT304	-0.1816	0.053	0.822757	118.672	139.333
T000032	UTAT79	-0.1929	0.053	0.822757	22.6618	30.8382
T110522	DIO3OS.1	-0.1912	0.053	0.822757	7.59815	23.459
T272610	PRCAT66	0.1891	0.053	0.822757	15.6671	21.3717
T195261	CVAT17	-0.1956	0.054	0.822757	57.1575	143.832
T030861	CAT167.1	0.1859	0.054	0.822757	13.7828	23.7761
T169099	CAT2067	-0.1868	0.054	0.822757	1331.14	1728.45
T345055	CAT1051.3	-0.2011	0.054	0.822757	198.595	312.988
T163281	THCAT443	-0.2021	0.054	0.822757	4.04038	7.11167
T158433	KCCAT621	-0.193	0.054	0.822757	143.778	188.166
T048717	KCCAT475	-0.1775	0.055	0.829082	20.4287	33.6496
T107303	BRCAT274	0.1857	0.055	0.829082	7.22289	11.1968
T245294	THCAT280	0.1988	0.055	0.829082	2.95692	11.0527
T306347	THCAT460	-0.2117	0.056	0.829082	2.42428	6.35958
T166624	KCCAT139	-0.1846	0.056	0.829082	38.67	51.715
T016620	CAT85	-0.1825	0.056	0.829082	11.269	16.1272
T215731	THCAT276	-0.2081	0.056	0.829082	3.55334	9.15535
T226898	KCCAT575	-0.193	0.056	0.829082	6.40075	13.3094
T111199	CAT1706	-0.193	0.056	0.829082	15.0982	24.0699
T026483	BLCAT7	-0.1968	0.057	0.830824	5.68226	8.78351
T235516	THCAT355	-0.1921	0.057	0.830824	58.1193	98.7126
T375181	CAT2283.2	0.1816	0.057	0.830824	344.744	429.933
T193450	BRCAT59.1	-0.1897	0.057	0.830824	7.65301	19.9364
T108056	CAT1694.1	-0.1896	0.057	0.830824	20.3961	32.1392
T171425	MEAT117	0.1775	0.058	0.832512	126.173	164.57
T317645	KCCAT527	-0.1865	0.058	0.832512	4.46039	9.27812
T191192	THCAT602	0.1842	0.058	0.832512	260.083	304.561
T156674	CAT1985	-0.1948	0.058	0.832512	13.547	18.032
T106738	CAT1684.3	-0.1921	0.058	0.832512	38.556	54.3639
T027958	CAT151.1	0.18793	0.059	0.83919	27.2363	49.0489
T059117	KCCAT602	0.1935	0.059	0.83919	3.06955	12.6121
T162822	CAT2024	0.1892	0.059	0.83919	24.5024	45.6598
T330861	CAT965	-0.1851	0.06	0.841163	49.6584	75.8381
T079529	HOTAIR.3	0.191	0.06	0.841163	21.9186	53.1893
T129959	CAT1842.1	-0.1869	0.061	0.841163	262.663	334.248
T056986	CAT1350.5	0.1896	0.061	0.841163	33.2369	89.8565
T166766	TINCR.1	0.1911	0.061	0.841163	540.781	1185.33
T304770	THCAT31	0.198	0.061	0.841163	3.21174	7.95251
T123753	KCCAT2	-0.182	0.062	0.841163	127.268	238.122
T334254	CAT984.2	-0.1914	0.062	0.841163	8.393	15.6558
T247980	KCCAT301	-0.1866	0.062	0.841163	24.0857	48.1351
T076864	CAT1498	-0.1928	0.062	0.841163	9.65596	18.0185
T148958	MAP3K14-AS1.2	-0.1895	0.062	0.841163	33.5746	43.6709
T184100	THCAT99	-0.194	0.063	0.841163	5.09629	9.07542
T227317	LINC00319.1	0.1841	0.063	0.841163	29.1963	59.6862
T048489	KCCAT62	0.186	0.063	0.841163	2.00534	3.51649
T205537	CAT352.2	-0.1835	0.063	0.841163	5.72751	11.3368
T027960	CAT151.3	0.1691	0.063	0.841163	174.477	244.428
T038367	CAT1239	0.1721	0.063	0.841163	13.6767	18.533
T219472	ZFAS1.4	-0.1765	0.064	0.841163	260.514	344.14
T365807	MBAT108	-0.1781	0.064	0.841163	94.3014	119.024
T291162	GRPEL2-AS1	0.1751	0.064	0.841163	14.3015	17.6679
T245853	BRCAT331	0.1817	0.064	0.841163	2.55038	4.09124
T177397	CAT2113.2	-0.1908	0.064	0.841163	93.9662	121.576
T167078	KCCAT69	-0.1794	0.064	0.841163	2.34002	3.97065
T107521	THCAT372.3	-0.2005	0.064	0.841163	4.91559	7.84629
T286651	KCCAT25	-0.1939	0.065	0.841163	2.96386	4.67501
T039115	ESAT116.1	0.1651	0.065	0.841163	350.846	437.337
T242323	PRKAR2A-AS1	-0.1835	0.065	0.841163	139.749	174.298
T252227	PRCAT169	0.1815	0.065	0.841163	19.0891	38.522
T296497	CAT763.2	-0.1937	0.065	0.841163	21.1508	52.5806
T010479	LINC00853	-0.1995	0.065	0.841163	11.1194	16.7687
T119038	PNAT107	-0.1791	0.065	0.841163	4.55638	6.88613
T242849	SEMA3B-AS1	-0.1814	0.066	0.841163	24.0655	38.4709
T074283	CAT1475	0.1742	0.066	0.841163	7.17626	12.3412
T166956	CAT2050.1	0.1751	0.066	0.841163	4.65585	7.24201
T259820	THCAT606	-0.1871	0.066	0.841163	16.4928	28.7943
T017591	KCCAT16.1	-0.1821	0.066	0.841163	29.0102	46.8082
T228428	CAT2220	-0.1684	0.066	0.841163	154.702	195.144
T094824	CAT1616.1	-0.1812	0.066	0.841163	78.0939	98.5174
T133951	CAT1865	-0.1784	0.067	0.841163	79.664	97.676
T018074	KCCAT128.1	-0.1687	0.067	0.841163	116.822	147.185
T283685	CRAT25	0.1795	0.067	0.841163	35.1913	43.7612
T375584	CAT2286	-0.1694	0.067	0.841163	16.9331	27.7136
T291248	PRCAT106	0.1761	0.067	0.841163	31.36	78.8036
T106140	THCAT572	0.1876	0.067	0.841163	3.10499	4.70341
T282591	CAT664.1	-0.1697	0.068	0.851447	86.9287	153.839
T081649	CAT1542.1	0.1877	0.069	0.85263	5.86947	8.75078
T150081	CAT1949	-0.1838	0.069	0.85263	744.368	1013.3
T322051	LINC00265.1	0.1713	0.069	0.85263	63.6025	96.8705
T369840	CAT1212	0.182	0.069	0.85263	187.985	284.37
T196585	CAT288.1	0.1757	0.069	0.85263	12.009	19.5953
T139676	CAT1895	0.1875	0.07	0.852724	13.8547	25.5396
T313496	OVAT257	0.1868	0.07	0.852724	126.36	207.579
T306342	CAT822	-0.1849	0.07	0.852724	229.571	449.09
T150343	CAT1951	0.1776	0.07	0.852724	6.47951	16.19
T326056	HICLINC170	-0.1912	0.07	0.852724	1.8068	3.6639
T150556	CAT1953.1	0.1869	0.071	0.852724	3.18284	6.17045
T334872	CAT989	-0.1794	0.071	0.852724	168.911	209.449
T061250	THCAT446	0.1705	0.071	0.852724	2.65132	6.20834
T041025	KCCAT251	-0.1754	0.071	0.852724	14.4036	21.018
T360304	PRCAT102.2	-0.1849	0.071	0.852724	2.96098	7.04182
T224779	PRCAT221	-0.1749	0.071	0.852724	13.408	21.9248
T128529	CAT1827	0.1688	0.072	0.854009	24.3368	31.2744
T346504	KCCAT503	-0.1845	0.072	0.854009	7.98911	19.5438
T151780	CAT1961.2	0.1715	0.072	0.854009	5.00078	10.0564
T071257	KPCAT52	-0.1821	0.073	0.854009	7.95138	18.3687
T064190	AMAT112	-0.1733	0.073	0.854009	101.067	149.077
T325788	PNAT128	-0.1724	0.073	0.854009	184.139	239.872
T255263	THCAT60	0.1766	0.073	0.854009	32.8514	46.0274
T249156	KCCAT593	-0.1789	0.074	0.854009	8.26584	10.5449
T154290	LVCAT13	-0.1779	0.074	0.854009	80.7163	110.305
T312881	CRAT2	0.1698	0.074	0.854009	179.905	220.162
T041731	CAT1259.3	-0.1862	0.074	0.854009	27.9754	71.3616
T109219	CAT1696	-0.1777	0.075	0.854009	72.0574	102.509
T238837	MBAT103	-0.1741	0.075	0.854009	325.286	446.72
T053405	CAT1328	-0.1705	0.075	0.854009	13.2029	45.8107
T188030	CAT233	-0.17114	0.075	0.854009	39.4375	53.0925
T158634	BRCAT302.2	-0.1869	0.076	0.854009	8.7947	20.8504
T226847	KHCAT307	-0.18925	0.076	0.854009	0.716874	5.74335
T055817	BRCAT73.1	0.1808	0.076	0.854009	4.86592	10.3407
T247981	KCCAT337	-0.173	0.076	0.854009	14.4334	29.0841
T143039	CAT1913	-0.1618	0.076	0.854009	39.5273	49.0762
T240634	ENTPD3-AS1.2	-0.1795	0.076	0.854009	54.3501	67.979
T240632	ENTPD3-AS1.3	-0.1795	0.076	0.854009	54.3501	67.979
T018833	CAT101.1	0.173	0.077	0.854009	18.3603	37.4213
T011935	THCAT529.2	-0.1934	0.077	0.854009	3.71339	5.85535
T002220	LSCAT241	-0.1821	0.077	0.854009	8.13515	13.2472
T145874	KHCAT448	-0.1678	0.077	0.854009	273.641	380.599
T189182	AMAT153	0.1769	0.077	0.854009	1.80096	2.75133
T312317	LSCAT188	-0.1786	0.077	0.854009	4.60352	7.56166
T042008	KHCAT453	-0.1829	0.077	0.854009	25.9242	35.8368
T353044	CAT1113.2	0.1686	0.077	0.854009	25.9335	44.3831
T009064	HICLINC8	-0.1775	0.077	0.854009	67.1984	107.201
T311917	LINC00271.1	-0.1749	0.078	0.854009	7.81608	17.9678
T373441	THCAT371	-0.17102	0.078	0.854009	20.3045	24.7588
T335572	ATP6V0E2-AS1.1	-0.17706	0.078	0.854009	16.2755	22.0617
T183145	PRCAT3.3	0.1721	0.078	0.854009	36.7437	82.0603
T005060	THCAT138	-0.174	0.078	0.854009	5.37971	7.93742
T075756	LSCAT43	-0.1761	0.078	0.854009	8.97241	24.442
T326331	LINC00035	-0.1704	0.078	0.854009	13.9125	38.6704
T222063	KCCAT154	-0.1635	0.079	0.856962	38.0368	51.7359
T203345	KCCAT481	0.16822	0.079	0.856962	5.13524	8.54741
T159184	CAT2003.2	-0.1795	0.08	0.856962	33.5997	56.7377
T047724	MBAT88	-0.174	0.08	0.856962	151.225	267.33
T344274	CAT1046	0.1784	0.08	0.856962	48.0907	58.1865
T098093	UBAC2-AS1	-0.1768	0.08	0.856962	52.6737	71.7539
T029335	KHCAT4	-0.1663	0.08	0.856962	4.06072	10.2248
T037552	HNCAT236	-0.169	0.081	0.856962	4.14525	6.09168
T350595	BRCAT129	0.1652	0.081	0.856962	10.8614	14.8958
T047812	THCAT58	-0.1813	0.081	0.856962	5.73439	10.6463
T013486	CAT67	-0.172	0.081	0.856962	33.6121	98.759
T225405	LINC00649.1	-0.166	0.081	0.856962	16.3642	37.9173
T126032	KCCAT35.1	-0.1683	0.081	0.856962	202.458	255.885
T167158	KCCAT164	-0.1689	0.081	0.856962	3.81752	6.4425
T006891	MATN1-AS1	-0.177	0.081	0.856962	24.349	33.2016
T036018	LINC00702.1	0.1636	0.082	0.857417	26.3274	37.8943
T191948	DGUOK-AS1.2	-0.1622	0.082	0.857417	113.259	148.859
T336714	PRCAT231	-0.184	0.082	0.857417	11.7347	20.3073
T207121	CAT364	0.1684	0.082	0.857417	29.3894	40.058
T129676	CAT1837.1	-0.1743	0.083	0.857417	138.848	173.737
T127418	MBAT97	-0.1702	0.083	0.857417	11.1303	13.9726
T037986	LVCAT67.2	-0.16623	0.083	0.857417	16.0367	25.2223
T135745	CAT1870	-0.1695	0.083	0.857417	19.0049	30.3145
T092588	KCCAT432	-0.1708	0.083	0.857417	23.6511	38.1843
T242348	CAT403.1	-0.175	0.083	0.857417	214.528	262.834
T362063	CMAT35	-0.165	0.084	0.857417	25.9735	36.1082
T348011	BRCAT70	0.17	0.084	0.857417	11.3447	28.7902
T033422	MEAT144	0.16801	0.084	0.857417	56.1101	125.523
T028931	CAT156	-0.1646	0.084	0.857417	39.2852	53.9363
T039532	CAT1247	-0.1751	0.084	0.857417	38.741	44.1217
T107631	KCCAT684	-0.1688	0.084	0.857417	7.59298	9.71575
T333167	MBAT105.3	-0.1661	0.085	0.857417	288.83	467.37
T334294	CAT985	0.1735	0.085	0.857417	65.6964	166.875
T094453	CAT1610.2	-0.172	0.085	0.857417	21.5127	27.813
T249724	CAT443	-0.1722	0.086	0.857417	10.1001	23.6876
T261610	LINC00504	0.163	0.086	0.857417	418.473	532.411
T304476	CAT807.1	0.1699	0.086	0.857417	7.1168	10.8903
T264758	LNX1-AS2	0.1633	0.086	0.857417	8.80342	14.3587
T283285	BRCAT18.1	0.1805	0.086	0.857417	7.98396	31.7349
T104624	CAT1665.3	0.1732	0.086	0.857417	4.0213	10.5033
T281892	CAT659	-0.1613	0.087	0.857417	192.387	791.028
T380073	PRCAT110	-0.1866	0.087	0.857417	9.67652	17.5404
T231759	MBAT63	-0.1729	0.087	0.857417	7.1486	11.2057
T180070	CAT2126	0.1663	0.088	0.857417	347.392	447.034
T037127	CAT1228	-0.1645	0.088	0.857417	25.388	44.8145
T322118	CAT932.1	0.1744	0.089	0.857417	30.7343	55.6439
T352722	CAT1111	-0.1564	0.089	0.857417	45.0262	68.671
T348768	CAT1076.2	-0.1691	0.089	0.857417	32.2694	44.6697
T201907	CAT324	-0.164	0.089	0.857417	83.1661	134.149
T168429	UTAT16	0.1675	0.09	0.857417	19.7072	24.709
T345231	KCCAT696	-0.1756	0.09	0.857417	9.43618	14.8958
T012270	CAT60.2	-0.1719	0.09	0.857417	60.6454	89.0609
T358353	THCAT260	-0.1863	0.09	0.857417	4.56186	16.4464
T206053	KHCAT421	-0.1688	0.091	0.857417	22.968	31.3777
T045544	CAT1285.1	-0.1618	0.091	0.857417	148.713	181.878
T011536	CAT55	-0.1628	0.091	0.857417	20.9792	43.5939
T074504	KHCAT260	-0.1636	0.091	0.857417	7.84092	17.7756
T058954	CAT1357	-0.1751	0.091	0.857417	9.10873	12.6278
T263567	KCCAT429	-0.1769	0.092	0.857417	27.6933	58.1354
T035789	KCCAT37	0.1713	0.092	0.857417	7.74881	15.2822
T171224	CAT2082.1	0.1639	0.092	0.857417	134.246	228.477
T204814	KCCAT505	-0.1673	0.092	0.857417	6.21706	10.6551
T163670	KCCAT285	0.1741	0.092	0.857417	4.92997	7.10554
T075102	KCCAT28	0.1688	0.092	0.857417	24.9728	44.8146
T169754	OVAT50	-0.17188	0.092	0.857417	15.7805	21.8139
T302963	LSCAT252	-0.1647	0.092	0.857417	35.9882	52.9391
T189061	BCYRN1	-0.1561	0.093	0.857417	14.6602	27.9022
T240877	LACAT51	0.1723	0.093	0.857417	13.4223	39.4434
T241201	THCAT334.3	-0.1743	0.093	0.857417	6.93858	28.3562
T118681	HNCAT175	-0.1599	0.093	0.857417	26.7059	45.9327
T105463	CAT1674	-0.1498	0.093	0.857417	4.32894	11.4016
T006958	OVAT126	-0.16814	0.093	0.857417	4.14326	5.98453
T282175	CAT661.2	-0.1665	0.094	0.857417	23.1145	35.787
T069806	CAT1439	-0.163	0.094	0.857417	162.333	246.575
T244195	CAT412	-0.173	0.094	0.857417	14.9238	22.6379
T322556	AMAT24	-0.1629	0.094	0.857417	185.021	222.64
T167034	CAT2051	-0.1606	0.094	0.857417	2051.06	2446.11
T082674	CAT1549.1	-0.1669	0.095	0.857417	104.433	203.785
T290795	KCCAT184	0.1609	0.095	0.857417	9.55512	12.9489
T339244	CAT1007.2	-0.1555	0.095	0.857417	153.265	201.122
T041495	CAT1258	0.1766	0.095	0.857417	6.88927	10.0344
T342624	KCCAT77	-0.158	0.095	0.857417	7.49933	44.6807
T042675	CAT1266.2	-0.1629	0.095	0.857417	64.2478	295.99
T036693	THCAT415	0.1647	0.096	0.857417	3.36129	5.28295
T052557	CAT1324	-0.1649	0.096	0.857417	103.633	138.811
T101136	CAT1642	-0.1704	0.096	0.857417	30.2236	37.2124
T272860	MEAT130.2	0.16	0.096	0.857417	18.399	26.2191
T120420	CAT1775.3	-0.1788	0.096	0.857417	17.9856	49.1744
T304063	CAT803	-0.1605	0.096	0.857417	36.4197	46.7085
T146532	UTAT49	-0.16602	0.097	0.857417	14.6716	24.4165
T085169	LACAT227	-0.169	0.097	0.857417	14.9163	26.2158
T023519	CAT124	-0.163	0.098	0.857417	16.9764	30.9951
T025532	CAT138	-0.1556	0.098	0.857417	53.6427	67.5967
T121884	BRCAT390	-0.1665	0.099	0.857417	5.54322	10.4651
T118788	PRCAT59	0.1864	0.099	0.857417	2.70002	8.73605
T129955	CAT1841.1	-0.1658	0.1	0.857417	261.967	356.972
T287546	CAT702	-0.1597	0.1	0.857417	20.5625	28.4995
T350233	CAT1089.2	0.1544	0.1	0.857417	23.0461	36.449
T167528	CAT2057	-0.1566	0.1	0.857417	16.2534	27.1583
T023590	CAT128	0.1697	0.1	0.857417	84.825	114.795
T106368	CAT1681.1	-0.1585	0.1	0.857417	21.883	39.1146
T351871	THCAT1.2	-0.1724	0.1	0.857417	4.88488	11.9468
T349586	AMAT6	0.158	0.1	0.857417	168.09	206.989
T137046	CAT1878.1	0.1625	0.1	0.857417	26.1299	52.8432
T151551	CAT1957.1	0.1553	0.1	0.857417	124.147	253.69
T347940	CAT1065.1	-0.1719	0.1	0.857417	10.0106	15.7344
T073831	CAT1472.1	-0.1626	0.1	0.857417	8.62811	33.7733
T160534	CAT2009.3	-0.1613	0.1	0.857417	4.20004	7.03159
T081452	CAT1540.2	0.1669	0.1	0.857417	1.65765	2.97514
T075655	CAT1486	-0.1648	0.1	0.857417	79.8087	160.094
T270510	CAT581	0.1499	0.1	0.857417	79.5494	102.827
T259867	KCCAT268	-0.1518	0.1	0.857417	20.5906	29.1751
T330239	KCCAT375	-0.155	0.1	0.857417	16.5133	21.3433
T279547	CAT647.3	-0.173	0.1	0.857417	5.87566	12.9506
T315964	CAT893.5	0.1688	0.1	0.857417	22.5497	39.1255
T139540	AMAT138	0.1563	0.1	0.857417	4.50647	6.49228
T072116	BRCAT31	0.1606	0.1	0.857417	6.4669	11.446
T358581	OVAT90	-0.1652	0.1	0.857417	3.85889	5.3853
T107549	CAT1691	-0.155	0.11	0.857417	58.1802	82.8507
T327859	TP53TG1	-0.154	0.11	0.857417	554.437	698.753
T196170	KCCAT680.1	0.1443	0.11	0.857417	10.5335	13.0631
T212633	CAT2139.2	-0.1596	0.11	0.857417	7.38943	16.6281
T074098	CAT1473.3	-0.15203	0.11	0.857417	1317.47	1832.46
T061273	MALAT1.2	0.1499	0.11	0.857417	3769.39	6127.09
T061019	UTAT10	-0.1518	0.11	0.857417	572.473	684.387
T018075	KCCAT128.2	-0.15169	0.11	0.857417	33.0959	45.7264
T353732	FAM83H-AS1.3	0.1653	0.11	0.857417	159.355	262.095
T233507	MEAT7	-0.16508	0.11	0.857417	8.1312	50.3048
T244128	CAT411	-0.16551	0.11	0.857417	367.245	511.623
T312362	CAT870.1	0.1634	0.11	0.857417	4.30234	8.32943
T320665	MBAT62	-0.1526	0.11	0.857417	5.14718	7.07414
T183434	CAT198	-0.1582	0.11	0.857417	21.9868	30.0729
T271905	CAT584.1	0.1569	0.11	0.857417	67.203	92.1445
T272838	CAT594.2	-0.1581	0.11	0.857417	8.91683	12.682
T120699	CAT1779.1	-0.1622	0.11	0.857417	7.52409	11.3821
T038476	CAT1242.3	-0.1581	0.11	0.857417	96.8177	143.695
T214684	ESAT110.3	0.15	0.11	0.857417	187.944	258.263
T075537	KHCAT435	-0.1582	0.11	0.857417	4.81767	7.46897
T191270	THCAT431	0.1554	0.11	0.857417	67.2642	85.0191
T281243	LIFR-AS1.1	-0.1654	0.11	0.857417	5.74772	12.0806
T190485	CAT249.1	-0.148	0.11	0.857417	23.3869	37.9063
T232196	TUG1.3	0.1485	0.11	0.857417	1810.92	2325.51
T198160	CAT303.1	-0.178	0.11	0.857417	2.39949	3.84917
T016663	BRCAT119	-0.1596	0.11	0.857417	15.0262	78.1746
T073870	KCCAT388	-0.1557	0.11	0.857417	16.1772	54.6332
T166626	KCCAT82.1	-0.1666	0.11	0.857417	46.1081	58.6497
T199926	AMAT53	-0.1496	0.11	0.857417	10.683	12.958
T083979	CAT1559.1	-0.1546	0.11	0.857417	28.1589	43.9903
T266776	CAT562	-0.1624	0.11	0.857417	20.9818	48.2706
T152688	THCAT452	-0.1612	0.11	0.857417	29.9733	110.178
T219422	CMAT20	-0.1481	0.11	0.857417	11.2042	16.6242
T237325	CAT382	0.1565	0.11	0.857417	29.0262	43.9313
T342875	KCCAT620	-0.1588	0.11	0.857417	170.055	260.546
T348028	MEAT96	0.1592	0.11	0.857417	3.45669	6.08868
T111765	KHCAT17	-0.1499	0.11	0.857417	29.6521	40.9875
T048564	HNCAT287	0.15694	0.11	0.857417	2.44303	4.90705
T327271	CAT946.2	-0.1471	0.11	0.857417	132.513	170.794
T062260	CAT1379	-0.1559	0.11	0.857417	2.64344	5.80487
T014806	CAT75.1	-0.1617	0.11	0.857417	2.87712	5.13012
T335756	KHCAT43	-0.145	0.11	0.857417	24.9285	34.1541
T044478	CAT1280.2	0.1617	0.11	0.857417	6.39176	15.4433
T277882	LSCAT1.1	0.1484	0.11	0.857417	241.994	350.454
T214237	THCAT502	0.1473	0.11	0.857417	13.559	20.5142
T008049	THCAT582	-0.1748	0.11	0.857417	1.54824	2.23339
T269602	KCCAT13	0.1457	0.11	0.857417	7.70769	12.4508
T173250	CAT2096	-0.1593	0.11	0.857417	38.0967	59.746
T300934	HCP5.2	-0.1497	0.11	0.857417	861.395	1396.22
T040614	BRCAT110	0.1712	0.11	0.857417	4.58427	12.1135
T128960	PNAT101	0.1545	0.11	0.857417	54.061	70.934
T313035	CAT877	-0.1592	0.11	0.857417	48.6228	66.0771
T020090	CAT110.2	-0.1594	0.11	0.857417	23.4052	32.9506
T312225	KCCAT178.1	-0.1688	0.11	0.857417	4.93201	8.01822
T162087	KHCAT447	-0.1612	0.11	0.857417	2.83344	3.79801
T129477	CAT1834.2	0.155	0.11	0.857417	27.0637	39.518
T117944	AMAT81	-0.1429	0.12	0.865686	52.9096	79.452
T023099	KCCAT308	-0.1564	0.12	0.865686	5.93107	13.0505
T382726	PRCAT188.3	-0.1601	0.12	0.865686	9.21136	13.8102
T074289	CAT1476	0.1463	0.12	0.865686	27.3364	44.3146
T139868	PRCAT284	-0.163	0.12	0.865686	4.42001	10.7941
T229419	CAT2226	-0.1539	0.12	0.865686	18.4434	28.3276
T162025	KHCAT34.1	-0.148	0.12	0.865686	20.157	27.0068
T239000	SGOL1-AS1	0.1557	0.12	0.865686	17.9597	27.9079
T256885	TPRG1-AS2	-0.157	0.12	0.865686	62.9467	353.425
T196780	CAT293.1	0.15	0.12	0.865686	55.8806	76.1408
T063231	MEAT122.1	-0.1564	0.12	0.865686	14.9504	28.6855
T239850	LVCAT12	-0.1723	0.12	0.865686	1.62476	6.6906
T107664	CVAT14	0.146	0.12	0.865686	24.209	31.7954
T050283	CAT1315	-0.1531	0.12	0.865686	29.3708	40.0707
T167577	KHCAT287	-0.1516	0.12	0.865686	95.0711	118.273
T102914	CAT1652.2	-0.1465	0.12	0.865686	104.778	140.495
T174674	THCAT98	-0.1586	0.12	0.865686	10.1106	34.2489
T126429	LGAT114	-0.146	0.12	0.865686	36.0514	53.6007
T060459	THCAT146	0.1501	0.12	0.865686	4.10544	7.60713
T302198	CAT794	0.1472	0.12	0.865686	67.2398	95.5777
T293468	KCCAT97.1	-0.15709	0.12	0.865686	3.593	5.67775
T143758	KCCAT571	-0.1486	0.12	0.865686	14.7567	23.0719
T104809	KTN1-AS1.1	0.1464	0.12	0.865686	7.87847	12.0893
T320484	HOTAIRM1	-0.157	0.12	0.865686	9.42109	19.4481
T174446	THCAT507	0.1515	0.12	0.865686	35.9702	47.4291
T170397	CAT2076	-0.1431	0.12	0.865686	45.6686	68.7268
T039445	GBAT14	-0.1561	0.12	0.865686	7.09388	10.4704
T118748	CAT1768.5	0.15	0.12	0.865686	69.7466	161.194
T054997	CAT1336.1	0.1562	0.12	0.865686	10.5269	17.3404
T082899	CAT1552.2	0.149	0.12	0.865686	64.7726	86.0133
T147080	CAT1932	-0.1513	0.12	0.865686	170.568	276.386
T058234	CAT1354	-0.1424	0.12	0.865686	11.4093	17.0803
T077428	CAT1502.1	0.1607	0.12	0.865686	8.22196	16.9881
T148925	CAT1941.2	-0.1621	0.12	0.865686	14.4879	24.2837
T047575	BRCAT109	-0.1714	0.12	0.865686	7.11121	49.359
T148462	ASB16-AS1.2	-0.1436	0.12	0.865686	232.864	289.082
T288870	CAT714	-0.14906	0.12	0.865686	166.544	229.484
T161592	CMAT46	-0.1664	0.12	0.865686	4.57635	8.04143
T161591	CMAT45	-0.1654	0.12	0.865686	3.13986	5.55037
T017677	AP4B1-AS1	-0.1486	0.12	0.865686	17.477	27.02
T144378	CAT1916	-0.1503	0.12	0.865686	79.2542	107.203
T273277	CAT598.2	-0.1583	0.12	0.865686	11.7494	24.9745
T243740	CAT410	-0.1494	0.12	0.865686	28.9318	49.5533
T190747	CAT253.3	-0.1404	0.12	0.865686	51.6461	66.415
T200383	CAT314	-0.1476	0.13	0.865686	42.6783	73.3529
T174358	HNCAT2	-0.1478	0.13	0.865686	115.559	143.721
T171443	BRCAT60	0.1496	0.13	0.865686	21.5821	32.2659
T185669	KHCAT169.1	0.1417	0.13	0.865686	45.9924	68.2803
T180349	CVAT36	0.1451	0.13	0.865686	11.21	14.4917
T104896	CAT1668	0.1492	0.13	0.865686	8.07612	12.6555
T344192	CAT1045	-0.1384	0.13	0.865686	5.32182	7.45876
T281893	BRCAT160	-0.1413	0.13	0.865686	7.80809	34.554
T301669	CAT789	-0.1446	0.13	0.865686	224.762	313.384
T169832	BRCAT88	-0.1416	0.13	0.865686	26.4628	67.6024
T024811	KCCAT700	-0.1461	0.13	0.865686	65.8692	109.657
T104092	LGAT115	0.1456	0.13	0.865686	162.475	288.766
T009444	SZT2-AS1	-0.1492	0.13	0.865686	109.627	127.67
T228023	UTAT36	-0.1459	0.13	0.865686	5.45444	11.2111
T009217	CAT40.2	0.1438	0.13	0.865686	46.0341	66.4117
T148194	THCAT616	-0.1455	0.13	0.865686	34.5099	52.3958
T018595	CAT99.1	-0.149	0.13	0.865686	110.409	167.407
T320411	CAT915.3	-0.1433	0.13	0.865686	20.1566	33.4566
T258478	MFI2-AS1.1	-0.1474	0.13	0.865686	38.3367	71.8398
T193424	THCAT484	0.1579	0.13	0.865686	15.5327	43.5032
T214688	ESAT110.2	0.1397	0.13	0.865686	131.853	191.722
T214687	ESAT110.1	0.1407	0.13	0.865686	131.422	191.512
T195372	THCAT359	-0.1498	0.13	0.865686	6.09723	8.21014
T160574	LVCAT69	-0.1519	0.13	0.865686	11.1353	15.4082
T164479	CAT2033	-0.1443	0.13	0.865686	16.9212	26.3302
T235524	CAT2259.2	-0.1555	0.13	0.865686	86.3164	132.846
T060417	CAT1366	-0.1471	0.13	0.865686	97.795	154.064
T216121	CAT2157	-0.1433	0.13	0.865686	8.58874	52.6857
T070311	CAT1444	-0.1468	0.13	0.865686	18.8815	38.9344
T164907	THCAT551	-0.1515	0.13	0.865686	51.0878	64.8895
T196790	CAT295.2	0.1424	0.13	0.865686	166.128	218.608
T144726	CAT1919	-0.1546	0.13	0.865686	69.8228	104.852
T170645	THCAT469	-0.1434	0.13	0.865686	14.2297	21.1566
T320805	THCAT49.4	-0.1606	0.13	0.865686	12.66	25.7038
T061844	CAT1377	0.147	0.13	0.865686	186.882	249.719
T155521	KPCAT17	-0.1603	0.13	0.865686	8.26126	14.03
T080255	MBAT89	-0.1627	0.13	0.865686	36.3947	50.5054
T196811	CAT293.3	0.1436	0.13	0.865686	21.2475	28.2325
T030563	LACAT138	-0.1577	0.13	0.865686	4.22133	9.19724
T258398	CAT502	-0.1539	0.13	0.865686	2.2486	3.59884
T117795	BRCAT185.2	-0.1461	0.13	0.865686	14.5325	18.7097
T252993	PLCH1-AS1	0.1593	0.13	0.865686	8.26639	19.1013
T328842	KCCAT440	-0.138	0.13	0.865686	87.1672	111.107
T355787	CAT1133	-0.1518	0.13	0.865686	9.2314	14.0699
T284702	CAT679.2	-0.1369	0.13	0.865686	50.3406	65.2295
T108066	CAT1694.2	-0.1481	0.13	0.865686	20.5055	28.7741
T165338	CAT2041.2	-0.1605	0.13	0.865686	18.7318	51.8414
T351183	CAT1098.2	0.1598	0.13	0.865686	2.82693	5.03824
T200365	LVCAT88	0.148	0.13	0.865686	24.3055	80.7783
T302714	CAT798.1	-0.1613	0.13	0.865686	160.078	425.973
T031790	CAT175.2	-0.154	0.13	0.865686	31.2974	48.4314
T002518	KCCAT628	-0.1521	0.13	0.865686	68.0414	82.6753
T022371	CAT121.1	-0.15276	0.13	0.865686	21.2189	29.0337
T225404	LINC00649.2	-0.1532	0.13	0.865686	16.7395	49.5079
T104396	CAT1662	0.147	0.13	0.865686	8.6579	17.0519
T239482	CAT395	0.1418	0.13	0.865686	78.5046	99.8666
T260557	CAT511.1	-0.1527	0.13	0.865686	20.7951	48.7455
T048755	HICLINC251.1	0.1543	0.13	0.865686	6.53409	8.72158
T002936	HICLINC2	-0.1411	0.13	0.865686	33.76	42.681
T171355	CAT2084.1	0.1427	0.14	0.884725	104.732	151.925
T233174	CAT2244	-0.1462	0.14	0.884725	63.1267	88.3565
T284898	CAT682.1	0.1425	0.14	0.884725	98.8382	138.111
T123738	KCCAT23	-0.1504	0.14	0.884725	179.998	368.129
T063374	CVAT16	-0.1416	0.14	0.884725	1293.8	1689.97
T097865	CAT1625.1	0.142	0.14	0.884725	51.0723	206.149
T330731	THCAT237.2	-0.1483	0.14	0.884725	14.3896	56.4377
T291543	CAT733.1	0.144	0.14	0.884725	4.65882	7.6952
T094318	MED4-AS1	0.138	0.14	0.884725	6.70965	10.0857
T048566	HNCAT289	0.1514	0.14	0.884725	3.29579	6.44663
T186375	ESAT111	0.1518	0.14	0.884725	156.703	185.494
T241915	KIF9-AS1.1	-0.14073	0.14	0.884725	17.5246	22.0762
T325833	OVAT120	-0.1305	0.14	0.884725	4.1859	6.20001
T047878	CAT1298	-0.1422	0.14	0.884725	60.0042	85.6168
T174016	MBAT94	-0.1459	0.14	0.884725	83.5328	100.938
T293377	CAT745.1	-0.1395	0.14	0.884725	149.17	252.811
T036867	GATA3-AS1.5	-0.1603	0.14	0.884725	54.778	149.162
T275025	KHCAT360	-0.146	0.14	0.884725	18.7692	27.4959
T358409	THCAT564	-0.1664	0.14	0.884725	8.55617	27.3837
T223421	OVAT111	0.1445	0.14	0.884725	18.0613	28.8271
T047625	CAT1296	-0.1393	0.14	0.884725	160.247	207.61
T079630	PRCAT144	0.1377	0.14	0.884725	54.3758	115.341
T137286	KCCAT103	0.1401	0.14	0.884725	16.8375	28.1933
T040182	KCCAT142	-0.1539	0.14	0.884725	14.3147	23.9596
T323267	PNAT115	-0.1506	0.14	0.884725	17.8121	23.8282
T109473	BRCAT24.1	-0.1632	0.14	0.884725	37.0888	198.471
T347140	LACAT252	0.1423	0.14	0.884725	14.4128	47.6526
T356020	CAT1135	-0.1465	0.14	0.884725	17.6324	25.753
T195256	CAT281	-0.1455	0.14	0.884725	121.346	288.061
T148927	CAT1941.1	-0.1492	0.14	0.884725	33.8962	44.3026
T099719	GRTP1-AS1	-0.1541	0.14	0.884725	9.18933	12.9091
T297988	AMAT114	-0.1323	0.14	0.884725	11.1861	15.1078
T047062	THCAT463	-0.1477	0.14	0.884725	4.46425	6.50474
T366122	THCAT265	0.142	0.14	0.884725	3.5918	5.17222
T287319	STARD4-AS1	0.1458	0.14	0.884725	166.721	221.391
T092371	LINC01058	-0.1469	0.14	0.884725	20.6066	34.256
T263649	CAT535	-0.1476	0.14	0.884725	49.0861	70.1328
T350987	KCCAT365	-0.1462	0.14	0.884725	6.48792	15.4161
T110324	MEG3.1	0.1442	0.15	0.897332	169.038	322.652
T048011	PRCAT216	-0.1361	0.15	0.897332	5.83701	7.96291
T181776	ZNF667-AS1.2	-0.1363	0.15	0.897332	92.6409	158.482
T281624	KCCAT202	-0.1499	0.15	0.897332	5.81015	8.12458
T102562	OVAT89	-0.139	0.15	0.897332	12.1528	17.1805
T174598	CVAT25	-0.151	0.15	0.897332	4.99289	13.4799
T196824	THCAT571	-0.1424	0.15	0.897332	4.96791	7.84687
T064270	CAT1400	-0.147	0.15	0.897332	92.9216	148.407
T141786	CAT1903.1	-0.1471	0.15	0.897332	3.89247	7.43279
T114599	BRCAT65	-0.15	0.15	0.897332	7.88423	44.2087
T286655	KCCAT91	-0.1512	0.15	0.897332	3.33835	5.91559
T074169	HNCAT291	0.1401	0.15	0.897332	77.1108	101.211
T225512	CAT2206.1	-0.1425	0.15	0.897332	13.4487	36.9721
T169067	UTAT13	-0.1433	0.15	0.897332	51.2109	61.6236
T190843	CAT255.1	0.1383	0.15	0.897332	520.945	738.255
T054829	ZBED5-AS1.1	-0.1332	0.15	0.897332	505.369	642.253
T040565	CAT1252	-0.1356	0.15	0.897332	15.1403	22.4056
T318464	CAT902	-0.1435	0.15	0.897332	7.51752	18.2933
T036966	BRCAT6.1	0.1468	0.15	0.897332	12.0526	149.426
T156741	MAFG-AS1.2	0.1443	0.15	0.897332	57.3403	93.9057
T044505	KCCAT265	0.1342	0.15	0.897332	7.53526	15.1246
T029800	SERTAD4-AS1.2	-0.131	0.15	0.897332	39.7084	62.6811
T067662	CAT1425.1	-0.149	0.15	0.897332	11.5224	20.3554
T147078	CAT1931	-0.1339	0.15	0.897332	66.3168	93.4562
T053647	KHCAT47	-0.1445	0.15	0.897332	11.3027	13.9417
T281799	MBAT101	-0.1455	0.15	0.897332	78.0585	143.941
T140924	CAT1897	-0.1371	0.15	0.897332	18.3664	23.3233
T046285	CAT1290	0.1373	0.15	0.897332	13.4482	22.7192
T042584	MEAT142	-0.1427	0.15	0.897332	12.4809	17.0203
T045004	LINC00857.2	-0.1477	0.15	0.897332	9.70545	25.2106
T076646	CAT1494	-0.1352	0.15	0.897332	112.496	142.382
T048163	BRCAT74	0.1346	0.15	0.897332	9.28774	70.7529
T353729	CAT1117	0.1492	0.15	0.897332	30.4153	56.489
T242354	CAT405.1	-0.1419	0.15	0.897332	142.131	168.242
T163664	LACAT230	0.1492	0.15	0.897332	7.14354	10.5596
T151758	CAT1960.2	-0.1348	0.15	0.897332	49.0893	63.8709
T169171	CAT2069.2	-0.137	0.15	0.897332	877.041	1203.28
T378047	THCAT550	0.1356	0.15	0.897332	7.2586	12.5316
T004371	HNCAT96	0.1504	0.15	0.897332	4.05134	6.0826
T094827	CAT1617.1	-0.1405	0.15	0.897332	101.168	126.914
T111839	CAT1710.2	-0.1404	0.15	0.897332	475.946	612.671
T190486	CAT249.3	-0.1491	0.15	0.897332	6.2927	13.3549
T074554	CAT1479	0.1452	0.16	0.899976	10.7832	15.719
T254677	CAT472.1	0.1331	0.16	0.899976	3.27535	5.34151
T096538	EDNRB-AS1	0.1428	0.16	0.899976	3.98915	6.97154
T124208	KCCAT410	-0.1449	0.16	0.899976	82.3031	134.605
T344191	CAT1044	-0.1263	0.16	0.899976	46.67	79.2766
T002199	THCAT102	-0.1397	0.16	0.899976	30.5687	43.4494
T029274	LSCAT255	0.132	0.16	0.899976	11.3508	17.7113
T000487	CAT3	-0.1361	0.16	0.899976	67.8591	93.3608
T134737	CAT1866	0.1327	0.16	0.899976	17.8819	28.5887
T087854	KCCAT539	-0.1325	0.16	0.899976	6.60295	9.1724
T256889	KCCAT615	-0.1373	0.16	0.899976	24.6785	99.832
T292950	CAT741	-0.13	0.16	0.899976	6.98914	11.1113
T033403	CAT190.2	-0.1349	0.16	0.899976	2.6831	4.26687
T237326	CAT383	0.1401	0.16	0.899976	3.36673	5.62694
T262425	PRCAT142	0.135	0.16	0.899976	3.02798	6.46829
T011514	CAT54.2	-0.1408	0.16	0.899976	85.1065	110.781
T133838	LINC00922.1	0.141	0.16	0.899976	6.48255	12.5902
T156688	UTAT3	-0.1376	0.16	0.899976	455.154	568.489
T002753	HNCAT247	-0.1361	0.16	0.899976	4.00831	6.68331
T114445	CAT1723	0.1354	0.16	0.899976	1108.59	1449.87
T037480	KCCAT546	-0.142	0.16	0.899976	2.90869	7.61042
T277620	THCAT618	-0.1416	0.16	0.899976	18.1286	27.0726
T375351	CAT2284	-0.135	0.16	0.899976	37.3722	44.832
T171559	CAT2088.2	-0.1594	0.16	0.899976	8.94511	21.7012
T333142	CAT976	-0.1339	0.16	0.899976	10.2237	16.4938
T281790	CAT656.2	-0.1396	0.16	0.899976	10.5658	15.9997
T013488	CAT68	-0.144	0.16	0.899976	18.4764	44.4359
T218748	HNCAT13	-0.1417	0.16	0.899976	112.566	248.849
T056840	CSTF3-AS1	-0.1292	0.16	0.899976	6.30123	7.75774
T058448	KHCAT114	-0.1311	0.16	0.899976	26.3256	39.7193
T342876	CAT1032	-0.14049	0.16	0.899976	20.2807	29.9801
T106460	CAT1682	-0.1452	0.16	0.899976	7.36165	11.4719
T240653	AMAT5	-0.1405	0.16	0.899976	101.136	127.413
T232228	CAT2237	-0.1382	0.16	0.899976	19.5145	36.4835
T240849	KHCAT166	-0.1398	0.16	0.899976	34.9284	49.3024
T179427	KHCAT1	-0.1514	0.16	0.899976	3.96049	12.732
T148186	MBAT3	-0.1331	0.16	0.899976	85.4523	121.477
T019181	CAT104	-0.1407	0.16	0.899976	225.388	345.773
T084375	MEAT139	0.1323	0.16	0.899976	34.5111	46.4932
T010080	LINC01144	-0.1334	0.16	0.899976	30.5378	53.7103
T025051	CAT136.4	-0.1398	0.16	0.899976	10.9689	34.89
T274480	CAT604.3	-0.1454	0.16	0.899976	11.7011	18.5421
T184085	KHCAT449	-0.1334	0.16	0.899976	25.4911	36.8599
T015716	CAT81.5	-0.1454	0.16	0.899976	14.2067	124.452
T139456	KCCAT63	-0.1409	0.16	0.899976	6.62139	11.4033
T128926	KHCAT398	0.132	0.16	0.899976	6.01201	21.9626
T011943	THCAT529.1	-0.1385	0.16	0.899976	29.2587	37.8634
T192060	KHCAT386	-0.1367	0.16	0.899976	35.8192	47.5261
T203000	CAT328.7	-0.13229	0.16	0.899976	36.7826	55.0877
T268988	HICLINC105.1	0.1259	0.16	0.899976	35.5283	66.7541
T205376	CAT350	-0.1422	0.17	0.905385	138.956	204.702
T085712	CAT1565	-0.138	0.17	0.905385	185.293	254.562
T172132	LINC00662.1	-0.1333	0.17	0.905385	105.94	134.329
T142552	CAT1909.1	-0.135	0.17	0.905385	2732.13	3292.52
T082004	MEAT118	-0.1427	0.17	0.905385	3.5325	5.87021
T073718	CAT1469	-0.1203	0.17	0.905385	49.492	110.308
T073281	ESAT3	-0.149	0.17	0.905385	11.53	33.0793
T276755	CAT630.1	-0.1274	0.17	0.905385	8.38792	11.7328
T174866	MEAT110	-0.1329	0.17	0.905385	31.6319	42.1268
T263711	UGDH-AS1.3	0.1297	0.17	0.905385	698.665	853.182
T032788	CAT186.1	-0.1348	0.17	0.905385	40.6714	54.4368
T092682	CAT1596.1	-0.1283	0.17	0.905385	13.4536	25.3395
T289143	CRAT11	0.1321	0.17	0.905385	11.3621	13.4043
T291836	CAT734	0.1416	0.17	0.905385	255.149	406.678
T334984	THCAT283.2	-0.1516	0.17	0.905385	6.15891	10.0048
T313718	PNAT120	-0.1324	0.17	0.905385	45.1324	118.391
T042002	KHCAT373	-0.1307	0.17	0.905385	90.9697	121.73
T290066	ESAT17	-0.138	0.17	0.905385	27.8294	35.8296
T059190	CAT1361.2	-0.1362	0.17	0.905385	176.852	218.656
T126442	CAT1813.2	-0.1393	0.17	0.905385	42.6674	63.3641
T065358	KHCAT116	-0.1413	0.17	0.905385	12.4465	42.74
T237973	SLC6A1-AS1.2	0.1326	0.17	0.905385	18.8608	32.0717
T317004	KCCAT453	-0.1398	0.17	0.905385	6.63117	8.96832
T380205	LSCAT182	0.1332	0.17	0.905385	6.22498	11.624
T043903	DNAJC9-AS1	-0.145	0.17	0.905385	63.326	99.5579
T269691	KHCAT185	-0.13091	0.17	0.905385	64.9316	81.0987
T193449	BRCAT59.2	-0.14166	0.17	0.905385	5.00163	16.7403
T324409	CAT941.3	-0.1348	0.17	0.905385	7.58393	32.2889
T341428	KHCAT270	0.131	0.17	0.905385	13.1515	18.8138
T232428	AMAT126	-0.13787	0.17	0.905385	2.04054	2.75821
T183175	PRCAT67	0.136	0.17	0.905385	54.8552	116.489
T112050	MBAT74	-0.1351	0.17	0.905385	99.2642	348.761
T309701	KCCAT45	-0.1244	0.17	0.905385	59.2577	89.629
T147942	CAT1935	-0.137	0.17	0.905385	16.1383	52.355
T005701	CAT28.1	-0.1344	0.17	0.905385	53.7378	75.7162
T202750	MBAT80	-0.1389	0.17	0.905385	32.0654	48.842
T300038	HCG15	-0.1266	0.17	0.905385	105.019	150.419
T129850	AMAT124	0.1359	0.17	0.905385	5.18918	7.88623
T148949	MAP3K14-AS1.1	-0.1373	0.17	0.905385	125.792	162.333
T302079	CAT792	-0.1337	0.17	0.905385	55.4167	70.6564
T044793	CAT1282	-0.1349	0.17	0.905385	147.248	190.5
T046571	ENTPD1-AS1.5	0.1258	0.17	0.905385	19.99	25.9798
T194169	CAT275	0.1316	0.17	0.905385	57.9504	69.5955
T012416	CAT62.3	-0.1504	0.17	0.905385	14.6468	38.7029
T029622	MIR205HG.10	-0.1433	0.17	0.905385	46.3202	119.453
T200374	HICLINC63	-0.14142	0.17	0.905385	2.61826	4.6124
T284448	ESAT115	-0.1307	0.18	0.905385	89.353	109.258
T139412	PITPNA-AS1	-0.125	0.18	0.905385	39.4918	49.3531
T060079	CAT1363.2	0.1289	0.18	0.905385	63.8342	191.796
T206254	OVAT10.2	-0.13	0.18	0.905385	106.931	131.429
T203415	HOXD-AS1	0.126	0.18	0.905385	142.789	278.446
T232811	KHCAT21.1	-0.1324	0.18	0.905385	65.2792	87.4523
T359193	CAT1144.1	-0.1444	0.18	0.905385	32.5162	70.7467
T117800	PRCAT195	0.1284	0.18	0.905385	6.57533	21.9945
T062680	KCCAT623	0.1397	0.18	0.905385	3.17432	22.6427
T181485	CAT2133.1	-0.134	0.18	0.905385	61.3717	101.732
T186247	DNAJC27-AS1.1	-0.1297	0.18	0.905385	12.2703	15.5728
T143999	CAT1915	-0.1268	0.18	0.905385	744.422	951.688
T029715	CAT161	-0.1396	0.18	0.905385	4.68712	10.2369
T114826	MBAT83	0.1271	0.18	0.905385	11.3027	15.0936
T193444	LINC00152.1	0.1267	0.18	0.905385	106.536	143.823
T107162	CAT1688.1	-0.1225	0.18	0.905385	244.647	311.304
T140194	HRAT3	-0.1187	0.18	0.905385	21.8307	27.1665
T225287	KCCAT225	-0.122	0.18	0.905385	114.903	139.031
T062414	THCAT620	0.1324	0.18	0.905385	355.776	448.483
T077368	CAT1501.1	0.1321	0.18	0.905385	2819.86	3841.02
T367428	CAT1204.2	-0.1415	0.18	0.905385	13.2731	25.617
T030352	CAT163	0.1265	0.18	0.905385	60.0581	92.4438
T322424	PRCAT233	0.1303	0.18	0.905385	13.3114	22.165
T038688	CAT1244	-0.1283	0.18	0.905385	11.4577	17.2648
T054988	THCAT118	-0.1428	0.18	0.905385	54.9305	121.776
T211903	BRCAT33	0.1408	0.18	0.905385	26.8298	121.098
T379682	HNCAT1	-0.1285	0.18	0.905385	31.3214	40.2088
T309621	CAT846	0.1242	0.18	0.905385	71.5777	90.26
T215475	CAT2152.3	0.1363	0.18	0.905385	10.1113	18.4916
T014432	BRCAT392	-0.1285	0.18	0.905385	12.167	15.4138
T225820	CAT2208.2	-0.1287	0.18	0.905385	62.3789	85.036
T144760	CAT1920.2	-0.1273	0.18	0.905385	219.353	287.233
T211428	HNCAT283	0.147	0.18	0.905385	4.22781	28.9634
T255857	CAT481	0.1251	0.18	0.905385	48.4936	61.2032
T365373	CAT1187	-0.1368	0.18	0.905385	68.9587	93.8052
T092694	KHCAT330	-0.136	0.18	0.905385	8.24151	27.6968
T376410	FTX	0.1261	0.18	0.905385	38.6679	52.6286
T014809	CAT75.2	-0.1273	0.18	0.905385	29.8894	48.5729
T196776	MIR4435-1HG.6	0.1284	0.18	0.905385	176.08	228.586
T138055	CAT1884.2	-0.1388	0.18	0.905385	10.8543	25.7507
T117881	CAT1762.4	-0.1403	0.18	0.905385	11.3447	67.4119
T178086	OVAT260	-0.1265	0.18	0.905385	200.51	242.139
T129953	CAT1841.2	-0.1313	0.18	0.905385	95.4502	123.779
T160562	CAT2012	-0.1293	0.18	0.905385	63.7597	77.1448
T032262	KHCAT6	-0.1343	0.18	0.905385	14.2296	31.8164
T302712	CAT798.2	-0.132	0.18	0.905385	698.734	863.779
T380188	HNCAT78	0.1306	0.18	0.905385	13.1086	42.1116
T288594	CAT710	-0.13	0.18	0.905385	210.938	292.95
T290285	PRCAT91	0.1337	0.18	0.905385	13.0193	26.6634
T037681	LSCAT274	0.1304	0.18	0.905385	14.0001	19.5961
T351723	AMAT170	0.1383	0.18	0.905385	14.5675	26.2027
T174648	CAT2099	-0.1346	0.18	0.905385	55.381	83.8519
T006703	PRCAT249	-0.1407	0.18	0.905385	1.88732	6.99103
T306887	PRCAT179	0.1335	0.19	0.911845	11.8975	40.3033
T060449	CAT1367	0.1208	0.19	0.911845	1103.12	1317.48
T219474	ZFAS1.2	-0.1221	0.19	0.911845	2234.85	2963.39
T257678	TMEM44-AS1.1	-0.1369	0.19	0.911845	77.2788	105.812
T175026	CAT2100.1	0.1359	0.19	0.911845	46.0815	69.5189
T256817	TPRG1-AS1	-0.1285	0.19	0.911845	88.4158	156.052
T234728	CAT2255	-0.1244	0.19	0.911845	143.004	178.052
T125011	AMAT59	-0.1237	0.19	0.911845	56.7781	79.682
T045739	AMAT22	-0.1364	0.19	0.911845	44.311	59.6584
T111739	CAT1709.1	-0.129	0.19	0.911845	5.01951	9.82716
T250339	LACAT211	-0.1365	0.19	0.911845	7.84194	11.8552
T189064	CAT237.1	-0.123	0.19	0.911845	22.6437	44.0113
T119766	UTAT12	0.1259	0.19	0.911845	23.9225	29.7999
T352392	KCCAT102.1	-0.1344	0.19	0.911845	4.04842	5.91299
T274578	HAND2-AS1.3	-0.1401	0.19	0.911845	11.2386	19.5232
T261947	CAT521	-0.1256	0.19	0.911845	111.399	143.842
T000306	THCAT96.1	-0.1359	0.19	0.911845	10.3639	16.2322
T081209	CAT1534.2	0.1345	0.19	0.911845	110.6	176.444
T162728	LGAT112	-0.1285	0.19	0.911845	54.5419	70.0306
T281808	CAT657.2	0.1382	0.19	0.911845	5.1271	8.16218
T076482	CAT1493	-0.12253	0.19	0.911845	177.02	239.434
T220458	CAT2182	0.126	0.19	0.911845	17.5696	26.8424
T127290	AMAT10	-0.1207	0.19	0.911845	84.9117	110.863
T233756	CAT2247.1	-0.1309	0.19	0.911845	35.3485	47.3106
T011405	THCAT233	-0.1384	0.19	0.911845	9.93553	12.4793
T254330	CAT470	0.1307	0.19	0.911845	4.52581	9.55626
T200012	CAT313.6	0.1328	0.19	0.911845	2.39111	4.27419
T109783	PRCAT114	-0.1246	0.19	0.911845	31.3476	41.5891
T072551	AMAT1	-0.1278	0.19	0.911845	96.855	118.437
T225159	PAXBP1-AS1	0.1259	0.19	0.911845	33.683	46.6932
T208773	CAT372.2	-0.1249	0.19	0.911845	5.73831	8.68985
T186902	CAT220	-0.1266	0.19	0.911845	267.427	324.519
T008728	CAT38	0.1289	0.19	0.911845	2.4004	5.97497
T317967	LVCAT6	0.12549	0.19	0.911845	598.503	793.85
T312446	CAT871	-0.13	0.19	0.911845	4.04227	6.95598
T342925	CAT1034	-0.131	0.19	0.911845	59.2705	108.064
T144646	CVAT13	0.119	0.19	0.911845	516.531	672.001
T198177	NIFK-AS1	-0.1185	0.19	0.911845	26.0933	32.0081
T231417	KCCAT296	-0.1378	0.19	0.911845	33.1865	62.0062
T360998	CAT1157	-0.1292	0.19	0.911845	29.4015	34.5001
T038692	KCCAT379	-0.1326	0.19	0.911845	2.50235	3.9689
T259514	KCCAT605	-0.1207	0.19	0.911845	10.1045	16.1652
T002705	CAT12.3	0.1259	0.19	0.911845	6.83174	10.2993
T350988	LINC00861	-0.1346	0.19	0.911845	5.30517	12.7665
T162567	HICLINC356.6	-0.1445	0.19	0.911845	8.63098	14.4865
T093996	TPT1-AS1	-0.1254	0.2	0.917143	59.916	90.0603
T336822	CAT998	-0.1283	0.2	0.917143	6.86082	10.5714
T018117	CAT96	0.126	0.2	0.917143	3.23147	8.55728
T362814	KCCAT551	0.1218	0.2	0.917143	65.4133	80.4475
T302345	AMAT92	-0.1283	0.2	0.917143	64.7014	91.0075
T275816	CAT623.1	0.1216	0.2	0.917143	19.7897	30.7652
T287594	MBAT9	-0.1235	0.2	0.917143	12.7866	15.7223
T037820	CAT1235.1	-0.1187	0.2	0.917143	2462.96	3113.36
T167588	KCCAT406	-0.1155	0.2	0.917143	115.093	147.238
T225551	BRCAT15.1	0.1354	0.2	0.917143	6.59403	48.7686
T152679	CAT1967.1	-0.1244	0.2	0.917143	127.641	183.578
T287304	KCCAT305	0.1279	0.2	0.917143	4.28657	6.24078
T018596	CAT99.2	0.1222	0.2	0.917143	305.687	378.714
T270264	SNHG8.1	-0.1216	0.2	0.917143	272.244	502.147
T104965	CAT1669.1	0.12	0.2	0.917143	4.48199	7.5323
T294542	BRCAT151	-0.1307	0.2	0.917143	14.2854	37.2174
T190557	CAT250.1	-0.1237	0.2	0.917143	48.8863	61.6913
T109097	MBAT98	-0.1202	0.2	0.917143	12.2305	17.5042
T225781	CAT2207	0.1211	0.2	0.917143	11.3507	81.1712
T148265	BRCAT375	-0.13	0.2	0.917143	9.78189	29.586
T198571	MBAT76	-0.1208	0.2	0.917143	36.6394	69.0612
T251101	CAT453.2	0.1232	0.2	0.917143	64.4619	81.9727
T159916	AMAT157	-0.1377	0.2	0.917143	13.0441	20.7047
T282187	CAT662	-0.1262	0.2	0.917143	12.1733	16.6707
T268973	CAT577	0.1235	0.2	0.917143	477.72	613.007
T038056	MBAT92	-0.1279	0.2	0.917143	396.683	677.941
T030992	CAT171.2	0.1319	0.2	0.917143	33.7986	64.9373
T348141	CAT1067.2	-0.1307	0.2	0.917143	12.5641	21.7215
T046918	BRCAT373	-0.1329	0.2	0.917143	7.35471	27.613
T003797	KCCAT329	-0.1185	0.2	0.917143	38.4209	46.3448
T190484	CAT249.2	-0.13164	0.2	0.917143	3.54696	6.35632
T116827	MEAT38	0.1272	0.2	0.917143	32.2517	42.0231
T264867	KHCAT40.2	-0.126	0.2	0.917143	6.04258	16.5576
T098180	BRCAT334	-0.1295	0.2	0.917143	30.7161	44.0423
T127943	AMAT60	-0.1266	0.2	0.917143	40.457	48.1008
T333371	CAT977.2	-0.12914	0.2	0.917143	9.8172	13.496
T079593	HOXC-AS2.2	0.122	0.2	0.917143	26.1535	58.7861
T276906	HRAT5	0.125	0.2	0.917143	28.8999	40.431
T321693	CAT927	-0.1263	0.2	0.917143	13.6461	21.9199
T248876	ARHGAP31-AS1	-0.1223	0.2	0.917143	16.8039	31.0582
T261935	THCAT224	-0.1411	0.2	0.917143	12.7513	26.0353
T261131	PRCAT286.1	-0.1325	0.2	0.917143	4.94398	7.19968
T106736	CAT1684.4	-0.1253	0.2	0.917143	26.5584	36.6097
T088840	CAT1578	0.12	0.2	0.917143	8.31044	12.9673
T129476	CAT1834.1	0.1243	0.2	0.917143	46.6744	76.9188
T135202	LSCAT282	-0.1254	0.21	0.917143	3.48223	9.08511
T205747	CAT353.1	-0.1323	0.21	0.917143	4.20509	5.56882
T165981	KCCAT419	-0.1116	0.21	0.917143	51.222	65.7816
T206882	PNAT123.2	-0.1132	0.21	0.917143	85.3378	200.581
T334719	CAT987	-0.1167	0.21	0.917143	44.8665	98.6796
T225819	CAT2208.1	0.1221	0.21	0.917143	49.4674	65.7563
T338493	CAT1005.2	-0.1363	0.21	0.917143	7.26468	12.9089
T104538	KCCAT295	-0.1217	0.21	0.917143	32.1852	44.523
T183149	PRCAT9	0.1161	0.21	0.917143	18.2327	30.7738
T027332	CAT146	-0.1294	0.21	0.917143	1346.7	1697.03
T196823	CAT296.1	-0.1224	0.21	0.917143	15.2315	20.8957
T274593	HAND2-AS1.8	0.1309	0.21	0.917143	2.99637	5.62328
T266820	CAT565	-0.1153	0.21	0.917143	64.9599	92.1077
T177754	KCCAT149	-0.1197	0.21	0.917143	42.4965	52.061
T007150	CAT33	0.1264	0.21	0.917143	12.6976	19.09
T148999	KCCAT596	-0.1272	0.21	0.917143	12.743	18.2635
T202512	CERS6-AS1	0.116	0.21	0.917143	6567.31	7688.36
T028911	CAT155.1	-0.1265	0.21	0.917143	4.72228	40.1252
T231037	LACAT268	-0.1246	0.21	0.917143	148.671	195.124
T377326	CAT2293	-0.1219	0.21	0.917143	39.5375	139.291
T144460	CAT1917.1	0.119	0.21	0.917143	225.995	390.252
T342721	BRCAT30.1	0.1251	0.21	0.917143	7.23309	100.72
T238393	KHCAT451	-0.1204	0.21	0.917143	3.37699	5.37056
T183158	PRCAT28.3	0.1208	0.21	0.917143	4.14911	9.11152
T263702	UGDH-AS1.2	0.114	0.21	0.917143	3765.95	4677.21
T209773	CAT376	0.1153	0.21	0.917143	160.642	195.52
T207011	AMAT109	-0.1184	0.21	0.917143	16.9775	20.4175
T092175	CAT1591	-0.1256	0.21	0.917143	250.446	342.91
T205779	CFLAR-AS1.1	-0.1194	0.21	0.917143	22.4002	29.9853
T030998	CAT171.3	0.1261	0.21	0.917143	38.4353	76.4031
T298876	CAT779	-0.1203	0.21	0.917143	6.03612	12.7776
T313639	CAT880	0.1231	0.21	0.917143	58.9448	104.437
T313198	LACAT220	-0.1255	0.21	0.917143	4.56866	5.97971
T173448	HPN-AS1.5	-0.1275	0.21	0.917143	172.481	254.851
T012895	GNG12-AS1.4	-0.1298	0.21	0.917143	47.9118	82.3877
T189811	CAT242.5	0.1238	0.21	0.917143	22.9571	51.9575
T077318	LINC00938	-0.1189	0.21	0.917143	277.496	342.25
T001677	TP73-AS1.2	-0.1249	0.21	0.917143	44.277	72.204
T004297	PRCAT293	-0.1216	0.21	0.917143	18.3694	28.965
T011500	GBAT38	-0.1328	0.21	0.917143	14.1975	30.9051
T162756	CAT2022	-0.1245	0.21	0.917143	29.9288	41.541
T216833	KCCAT147	-0.1163	0.21	0.917143	26.262	32.4068
T195306	OVAT252	-0.124	0.21	0.917143	4.66649	5.64884
T314263	CAT883	0.1207	0.21	0.917143	14.1139	19.8167
T205207	CAT349	-0.131	0.21	0.917143	22.769	35.6465
T292055	THCAT581	0.13227	0.21	0.917143	2.33213	5.10152
T244582	PRICKLE2-AS1.2	0.1243	0.21	0.917143	14.8111	21.1501
T259285	KPCAT2.2	-0.1204	0.21	0.917143	36.8749	59.2688
T257476	KHCAT450	-0.126	0.21	0.917143	20.5278	34.8393
T278137	CAT639	-0.1256	0.21	0.917143	7.53961	40.6111
T062878	CAT1384.3	-0.1351	0.21	0.917143	15.6621	28.3994
T354908	HICLINC214.7	-0.128	0.21	0.917143	15.2546	26.7928
T130156	CAT1844	-0.1159	0.22	0.92644	129.905	186.76
T126035	KCCAT71	-0.1166	0.22	0.92644	40.4819	54.0012
T055152	BRCAT314	-0.1195	0.22	0.92644	12.4044	16.9148
T163562	CAT2029.2	0.1191	0.22	0.92644	136.87	289.436
T027088	UTAT77	0.122	0.22	0.92644	8.07118	12.2729
T201564	CCDC148-AS1	-0.1162	0.22	0.92644	12.4006	18.1329
T016104	KPCAT95	0.1241	0.22	0.92644	5.81865	12.1044
T327269	CAT946.1	-0.1162	0.22	0.92644	155.008	197.995
T317598	CAT898	-0.1172	0.22	0.92644	48.0016	63.6517
T078885	CAT1520.1	-0.12	0.22	0.92644	187.064	282.356
T225285	IL10RB-AS1.2	-0.11699	0.22	0.92644	28.1834	36.3079
T153691	AMAT116	-0.1155	0.22	0.92644	11.632	16.0628
T237322	KHCAT424	0.1185	0.22	0.92644	382.563	579.247
T307019	KCCAT206	-0.117	0.22	0.92644	5.60506	8.26689
T037587	LSCAT107	0.1116	0.22	0.92644	68.1885	104.908
T347740	CAT1064.1	0.1237	0.22	0.92644	4.07044	7.93262
T043237	CAT1270	0.1134	0.22	0.92644	5.28471	8.5438
T125697	CAT1809	0.1144	0.22	0.92644	118.418	257.221
T280557	CAT650	-0.1162	0.22	0.92644	44.3445	59.837
T130417	MEAT129	-0.1252	0.22	0.92644	42.192	60.8579
T233674	KHCAT461	-0.1171	0.22	0.92644	22.3289	33.5543
T104499	CAT1664	0.123	0.22	0.92644	304.4	408.928
T264435	CAT543	-0.1198	0.22	0.92644	39.4722	56.6462
T049511	CAT1308	0.11394	0.22	0.92644	18.3939	25.07
T239189	AMAT143	-0.1288	0.22	0.92644	20.7218	25.6741
T036706	PRKCQ-AS1.4	-0.1206	0.22	0.92644	21.0674	55.8726
T065467	THCAT130	-0.1261	0.22	0.92644	3.13898	7.04918
T351984	CAT1104.1	-0.1262	0.22	0.92644	84.588	132.913
T295902	AMAT111	-0.1178	0.22	0.92644	22.9948	29.3454
T217678	THCAT240	0.1228	0.22	0.92644	45.3129	59.4489
T375185	CAT2283.1	-0.1258	0.22	0.92644	85.0511	131.388
T114611	BRCAT67	-0.131	0.22	0.92644	3.52855	31.5892
T130777	CAT1846	0.1178	0.22	0.92644	119.622	145.548
T234600	CAT2253.3	-0.12178	0.22	0.92644	19.7377	31.8879
T308315	MANEA-AS1	-0.1244	0.22	0.92644	18.5571	28.7504
T333169	MBAT105.2	-0.11965	0.22	0.92644	140.853	224.334
T127415	LACAT239	-0.1208	0.22	0.92644	10.6098	15.9421
T140690	MIR497HG.2	-0.1156	0.22	0.92644	24.9729	33.0131
T263264	CAT534	-0.124	0.22	0.92644	17.3693	25.6723
T062875	CAT1384.2	0.1244	0.22	0.92644	19.3318	38.3581
T275568	AMAT84	-0.1138	0.23	0.934591	21.2474	27.9473
T102861	CAT1651	0.1148	0.23	0.934591	17.1382	36.6245
T070283	CAT1443	-0.11374	0.23	0.934591	13.3435	21.7142
T193502	THCAT511	-0.1246	0.23	0.934591	2.57823	4.28548
T349016	CAT1080	0.1123	0.23	0.934591	81.8419	115.441
T108891	BRCAT116	0.123	0.23	0.934591	3.42094	9.06358
T069226	MBAT64	-0.1262	0.23	0.934591	179.257	265.251
T157805	CAT1993	-0.1182	0.23	0.934591	11.3584	15.3456
T359954	CAT1147.2	-0.1206	0.23	0.934591	18.6509	25.7025
T186059	AMAT125	-0.1197	0.23	0.934591	4.41664	6.17617
T379447	BRCAT349	-0.1287	0.23	0.934591	7.14294	49.8209
T322202	INHBA-AS1	0.1141	0.23	0.934591	60.0514	104.527
T319437	BRCAT279.2	-0.12802	0.23	0.934591	4.25455	7.7298
T107626	CMAT13	0.1157	0.23	0.934591	17.3555	20.6095
T113567	BRCAT418	0.115	0.23	0.934591	20.4435	27.7081
T137044	CAT1878.2	0.1211	0.23	0.934591	13.4493	27.4047
T059192	CAT1361.1	-0.1177	0.23	0.934591	50.4302	95.6119
T191277	CAT261	0.1192	0.23	0.934591	35.912	45.9937
T191903	CAT263	-0.1178	0.23	0.934591	51.5277	65.5954
T139517	CAT1892.1	-0.1146	0.23	0.934591	586.681	697.279
T079064	CAT1523.1	-0.1178	0.23	0.934591	161.885	234.428
T114951	AMAT35	0.1117	0.23	0.934591	51.7129	64.9364
T099488	THCAT246	-0.1102	0.23	0.934591	24.3898	37.745
T302167	CAT793.2	-0.1184	0.23	0.934591	46.9427	464.634
T299453	CAT782	0.1303	0.23	0.934591	12.3412	30.8666
T204766	HNCAT25.1	-0.1306	0.23	0.934591	3.70874	9.43153
T105524	MBAT30	-0.1199	0.23	0.934591	12.4914	17.5341
T160599	CMAT55	0.1153	0.23	0.934591	33.8783	51.6533
T201904	CAT323	-0.1173	0.23	0.934591	90.9972	122.31
T032612	CAT184	-0.1116	0.23	0.934591	824.621	997.875
T151102	CAT1956.1	-0.1172	0.23	0.934591	25.9043	35.3525
T092655	THCAT250.1	-0.117	0.23	0.934591	5.1379	8.97409
T159122	BRCAT66	0.116	0.23	0.934591	11.7302	122.065
T222467	BRCAT29.2	0.1169	0.23	0.934591	88.5261	165.979
T110623	UTAT22	0.1178	0.23	0.934591	31.4502	38.4571
T144703	CAT1918	-0.116	0.23	0.934591	262.475	345.673
T162082	LVCAT72	-0.1216	0.23	0.934591	8.09137	11.9416
T041724	KCCAT500	-0.1235	0.23	0.934591	11.12	19.9537
T061395	CAT1373	0.115	0.24	0.934591	226.039	304.133
T226842	KCCAT272	-0.1167	0.24	0.934591	14.8877	26.5713
T030862	CAT168	0.106	0.24	0.934591	15.4223	23.9036
T283696	CAT671	0.1134	0.24	0.934591	33.9865	47.723
T359194	CAT1144.2	-0.119	0.24	0.934591	65.1527	122.98
T118756	PRCAT112	0.125	0.24	0.934591	3.08043	5.85993
T314152	AMAT113	-0.1133	0.24	0.934591	8.95346	13.1918
T325122	CAT942.2	-0.1242	0.24	0.934591	167.826	230.714
T207123	CAT365	0.1106	0.24	0.934591	32.8762	46.2714
T349396	CAT1083	0.1109	0.24	0.934591	70.1195	93.274
T372212	EIF1AX-AS1	0.1139	0.24	0.934591	6.56544	9.19679
T353655	HNCAT56	-0.1237	0.24	0.934591	92.3725	130.401
T188025	OVAT158	-0.1204	0.24	0.934591	5.66919	7.97427
T056522	THCAT191	-0.119	0.24	0.934591	2.68306	3.99199
T106814	KHCAT395.1	-0.1209	0.24	0.934591	6.43944	10.2368
T348825	CAT1077	0.1174	0.24	0.934591	27.7482	38.2735
T044563	MEAT111	-0.1181	0.24	0.934591	27.0494	40.9921
T081453	CAT1540.1	0.124	0.24	0.934591	2.15003	5.78709
T320359	HRAT26	0.111	0.24	0.934591	90.9982	156.805
T297706	HRAT9	-0.1145	0.24	0.934591	123.102	161.184
T132484	THCAT43	0.1172	0.24	0.934591	3.97671	7.60147
T077317	CAT1500	-0.1172	0.24	0.934591	214.746	292.578
T159667	CAT2005.2	0.1155	0.24	0.934591	8.29133	16.5323
T159191	KCCAT361	-0.11113	0.24	0.934591	37.6034	53.4006
T289807	CAT722	-0.1117	0.24	0.934591	132.029	161.727
T114694	UTAT18	0.1198	0.24	0.934591	53.9655	68.0938
T196149	KCCAT495	-0.115	0.24	0.934591	75.482	95.5858
T228870	KCCAT271	-0.1112	0.24	0.934591	6.78933	11.4724
T100201	CAT1638	0.1104	0.24	0.934591	11.9386	23.6658
T290788	MEAT97	-0.1268	0.24	0.934591	19.6289	41.1144
T187303	KCCAT217	-0.1219	0.24	0.934591	4.43916	13.1802
T092712	STCAT14	-0.1147	0.24	0.934591	6.43875	13.7843
T234734	LGAT3	-0.1166	0.24	0.934591	9.41358	13.2647
T165021	MBAT56	-0.119	0.24	0.934591	15.3573	26.4716
T226787	BRCAT76	0.118	0.24	0.934591	3.49527	9.92329
T124669	CAT1800.2	-0.1123	0.24	0.934591	251.709	337.286
T114874	CAT1729.3	0.1159	0.24	0.934591	33.9555	47.6138
T266793	MEAT140	-0.1109	0.24	0.934591	20.0803	30.7762
T057748	THCAT423	-0.1166	0.24	0.934591	5.2005	8.132
T332495	CAT971	0.1147	0.24	0.934591	3.01065	29.3812
T173157	THCAT272.1	-0.122	0.24	0.934591	17.5521	31.7137
T196772	MIR4435-1HG.8	0.1203	0.24	0.934591	60.6453	81.602
T131898	HNCAT90	0.1144	0.24	0.934591	16.1022	21.5893
T072475	CD27-AS1.1	-0.1185	0.24	0.934591	73.1687	90.1768
T262417	ESAT58	0.1225	0.24	0.934591	2.18763	3.00491
T148235	LSCAT92	-0.1238	0.24	0.934591	2.89357	5.44457
T354680	CAT1125.2	-0.114	0.24	0.934591	18.8239	33.5278
T231133	KCCAT319.2	-0.1126	0.24	0.934591	4.91621	7.79498
T231418	MIAT.2	-0.1053	0.24	0.934591	184.694	290.315
T196812	CAT296.2	-0.112	0.24	0.934591	39.6277	56.0903
T038369	THCAT345	0.1089	0.24	0.934591	5.40975	7.40387
T241304	ZNF197-AS1.2	-0.11287	0.24	0.934591	9.67675	13.4778
T195247	CAT280	-0.1168	0.24	0.934591	162.392	333.519
T309376	CMAT40	0.1119	0.25	0.936356	110.897	161.272
T206889	PNAT98.1	-0.1128	0.25	0.936356	11.857	32.4738
T184450	CAT211.2	-0.1149	0.25	0.936356	6.7057	9.79054
T036710	PRKCQ-AS1.3	-0.1228	0.25	0.936356	6.01268	20.2951
T174317	LINC00665.1	-0.1109	0.25	0.936356	146.498	185.948
T130237	CAT1845.2	-0.1061	0.25	0.936356	47.2982	68.9643
T221958	CAT2188	-0.1035	0.25	0.936356	46.8051	69.4486
T067507	MBAT110	-0.113	0.25	0.936356	62.8853	86.6034
T225510	CAT2206.2	-0.1173	0.25	0.936356	26.3888	45.0501
T252251	WWTR1-AS1.2	-0.1096	0.25	0.936356	24.1332	34.1827
T203646	LSCAT169	-0.11107	0.25	0.936356	9.9149	17.4107
T208934	CAT374.2	-0.1148	0.25	0.936356	3.56277	5.93221
T120415	CAT1775.1	-0.1119	0.25	0.936356	4.43171	21.4328
T041146	KHCAT391	0.1118	0.25	0.936356	3.01291	4.66707
T126462	PRCAT204	-0.1211	0.25	0.936356	6.53779	11.3497
T281866	BRCAT54.1	-0.1187	0.25	0.936356	55.0552	943.087
T321579	KHCAT358	-0.1158	0.25	0.936356	6.24208	9.04834
T157396	CAT1990.2	0.1079	0.25	0.936356	24.8123	48.7013
T256845	CAT493	-0.1178	0.25	0.936356	19.7496	55.9747
T150666	THCAT570	-0.1226	0.25	0.936356	6.89491	10.5569
T316709	HNCAT91	0.116	0.25	0.936356	3.44038	7.29694
T237218	LSCAT13.1	0.1182	0.25	0.936356	2.07988	3.71324
T203997	CAT343.2	-0.1153	0.25	0.936356	4.12083	8.90982
T158027	LINC00526	-0.1091	0.25	0.936356	75.2803	95.8866
T187346	AMAT140	0.1062	0.25	0.936356	27.4725	36.3069
T364168	CAT1177.2	0.1146	0.25	0.936356	22.6587	33.5359
T175664	KHCAT243	-0.1137	0.25	0.936356	264.299	465.907
T227683	CAT2218	-0.1222	0.25	0.936356	15.6147	25.4642
T063793	KCCAT555	-0.10836	0.25	0.936356	26.8032	35.6541
T187679	BRCAT143.3	0.1135	0.25	0.936356	26.3713	62.0713
T242797	MEAT124	-0.11	0.25	0.936356	22.0899	33.9928
T151419	BZRAP1-AS1.1	-0.1132	0.25	0.936356	63.4469	86.2599
T183196	PRCAT62	0.1183	0.25	0.936356	18.4165	27.295
T305646	MBAT93	-0.1175	0.25	0.936356	20.1454	28.8208
T188056	CAT234.2	-0.1101	0.25	0.936356	443.298	547.955
T180296	CAT2127.1	0.1086	0.25	0.936356	336.433	418.836
T340864	KCCAT146	0.1258	0.25	0.936356	1.83879	3.16036
T241300	ZNF197-AS1.1	-0.1182	0.25	0.936356	3.3825	5.12938
T120682	KCCAT367	-0.1042	0.25	0.936356	12.9872	21.7448
T094424	THCAT50.1	-0.122	0.25	0.936356	6.09784	11.1132
T247486	LACAT144	0.1178	0.25	0.936356	3.03804	7.21967
T151756	CAT1959	0.1236	0.25	0.936356	1.76978	2.56919
T105107	CAT1670	-0.1122	0.25	0.936356	8.2908	11.8458
T079514	HOTAIR.5	0.1178	0.25	0.936356	11.6831	26.3471
T245217	CAT424.1	-0.1114	0.25	0.936356	43.5826	116.895
T262495	AMAT130	-0.1086	0.25	0.936356	10.8472	15.8784
T259778	NOP14-AS1.2	-0.1081	0.25	0.936356	32.8923	51.3338
T086282	HICLINC285	0.1142	0.25	0.936356	5.88656	8.76798
T019989	CAT107	0.1041	0.26	0.93981	20.4457	25.8412
T324410	CAT941.1	-0.119	0.26	0.93981	7.79152	33.1744
T362204	CAT1162	0.111	0.26	0.93981	6.11981	27.7779
T153365	KCNJ2-AS1	-0.1023	0.26	0.93981	24.7292	40.9603
T192347	KHCAT315	-0.1121	0.26	0.93981	6.76977	11.7927
T367184	AMAT86	0.1129	0.26	0.93981	58.557	73.1577
T353734	CAT1118	0.1096	0.26	0.93981	18.0748	26.3347
T363705	THCAT71	0.1043	0.26	0.93981	25.8944	38.5608
T202995	CAT328.4	-0.1197	0.26	0.93981	2.60878	3.99705
T118007	CAT1764.2	0.1099	0.26	0.93981	15.4992	21.888
T243432	KHCAT23	-0.1061	0.26	0.93981	58.9629	75.6969
T284698	CAT679.1	-0.1093	0.26	0.93981	228.059	277.075
T284994	CKMT2-AS1.2	-0.111	0.26	0.93981	87.3665	111.025
T294567	THCAT515	0.1059	0.26	0.93981	8.37543	13.7092
T214239	CAT2145	0.106	0.26	0.93981	23.6796	33.2342
T377325	PNAT117	-0.1088	0.26	0.93981	25.5566	96.2552
T343450	CAT1037	-0.1117	0.26	0.93981	1.60857	2.89974
T073552	CAT1467	0.1072	0.26	0.93981	6.64906	19.9043
T118982	HNCAT182.4	-0.1157	0.26	0.93981	4.55032	9.54463
T064677	LSCAT42	0.1147	0.26	0.93981	6.38284	9.8536
T093098	THCAT124	0.106	0.26	0.93981	5.59664	9.2093
T281869	BRCAT54.2	-0.1163	0.26	0.93981	63.6173	1050.82
T260789	HNCAT68	0.1065	0.26	0.93981	6.72142	19.8305
T026189	BRCAT78.1	-0.1267	0.26	0.93981	3.67589	10.7563
T071210	CAT1451.1	0.1052	0.26	0.93981	33.5193	44.0462
T312316	CAT868	0.1107	0.26	0.93981	26.1307	40.6739
T171884	KHCAT159	-0.1081	0.26	0.93981	42.1498	79.9232
T048069	MBAT85	0.104	0.26	0.93981	43.3682	56.2451
T359969	THCAT277	0.1052	0.26	0.93981	38.5276	48.9914
T225520	KCCAT162	-0.1121	0.26	0.93981	129.524	207.278
T272471	MBAT90	-0.1166	0.26	0.93981	171.272	290.738
T118769	PRCAT121.1	0.1167	0.26	0.93981	13.7583	75.9422
T005702	CAT28.2	-0.11	0.26	0.93981	762.254	931.9
T074425	CAT1477.2	-0.1041	0.26	0.93981	64.7217	99.4339
T055745	CAT1341	-0.1106	0.26	0.93981	138.881	175.806
T290969	KCCAT383	0.1122	0.26	0.93981	8.09345	17.5657
T286297	BLCAT1	-0.1243	0.26	0.93981	6.54557	19.9729
T077822	BRCAT232	-0.127	0.26	0.93981	2.00396	3.07131
T129652	CAT1836	-0.1103	0.26	0.93981	28.5434	42.0451
T059852	CAT1362.3	-0.1116	0.26	0.93981	49.1959	67.8438
T346727	CAT1058.1	-0.1218	0.27	0.93981	20.5085	38.0615
T165464	CAT2042	-0.1003	0.27	0.93981	777.943	1080.45
T338492	CAT1005.1	-0.1122	0.27	0.93981	27.9902	50.5527
T141182	MBAT79	-0.1046	0.27	0.93981	196.202	243.286
T307495	BRCAT316	0.1207	0.27	0.93981	4.80445	8.94453
T378089	CAT2298.1	-0.1163	0.27	0.93981	2.8928	7.48881
T033010	MEAT143	0.1032	0.27	0.93981	14.3969	30.3051
T099604	MBAT69	-0.1045	0.27	0.93981	53.0249	105.87
T305655	THCAT543	0.1032	0.27	0.93981	23.85	32.4479
T045632	NUTM2A-AS1.2	-0.1107	0.27	0.93981	32.9319	50.3994
T121386	KCCAT569	-0.1057	0.27	0.93981	18.2216	25.6864
T015184	CAT77	-0.111	0.27	0.93981	6.20308	8.21217
T101759	UTAT29	-0.1077	0.27	0.93981	11.8186	15.8302
T371804	CAT2275.2	-0.1046	0.27	0.93981	95.9798	545.099
T079569	HOXC-AS3.3	0.1062	0.27	0.93981	12.4289	23.4319
T364847	CAT1181	-0.103	0.27	0.93981	43.0189	55.2071
T026671	PRCAT280	-0.1124	0.27	0.93981	1.98509	4.99475
T207351	CAT368.1	0.1101	0.27	0.93981	86.9923	291.491
T131759	KCCAT12	0.107	0.27	0.93981	5.36616	12.6494
T215907	ESAT112	0.104	0.27	0.93981	50.785	70.392
T198161	CAT303.2	-0.1077	0.27	0.93981	8.46943	11.1197
T320524	HOXA-AS2.5	-0.1086	0.27	0.93981	26.3521	37.9562
T015862	MPAT10	-0.0995	0.27	0.93981	10.1759	15.5424
T119007	LACAT149	0.1108	0.27	0.93981	4.30166	6.1464
T295962	CAT760.1	-0.1105	0.27	0.93981	6.67918	7.54924
T353606	OVAT103	0.1069	0.27	0.93981	11.6584	18.3204
T295443	TRIM52-AS1.1	-0.1067	0.27	0.93981	194.906	251.612
T259865	KCCAT332	-0.1027	0.27	0.93981	12.7074	16.4745
T365062	CAT1184.2	0.1056	0.27	0.93981	464.216	575.677
T040184	KCCAT317	-0.1101	0.27	0.93981	12.4904	17.8846
T231383	KHCAT67	-0.1079	0.27	0.93981	55.4934	72.9909
T041872	AMAT87	0.10091	0.27	0.93981	97.3748	120.662
T241024	THCAT559	-0.112	0.27	0.93981	5.87624	8.29305
T213539	KCCAT346	0.1065	0.27	0.93981	9.38402	14.8287
T287278	CAT699.1	0.1063	0.27	0.93981	1.95768	5.41611
T184361	CAT207	0.1098	0.27	0.93981	134.95	172.511
T084828	CAT1563	0.1018	0.27	0.93981	33.9599	55.6476
T117796	BRCAT185.1	0.1149	0.27	0.93981	2.94097	4.91322
T306331	CAT821.2	-0.1042	0.27	0.93981	859.184	1306.54
T135288	LACAT3	0.1076	0.27	0.93981	262.715	410.344
T367341	CAT1202.3	-0.1086	0.27	0.93981	112.561	186.096
T234401	CAT2252	0.1099	0.27	0.93981	411.689	541.519
T309673	TRAF3IP2-AS1.2	0.1126	0.27	0.93981	10.9801	26.3383
T241511	LIMD1-AS1.2	-0.1058	0.27	0.93981	39.3621	47.7299
T117964	CAT1763	-0.1077	0.27	0.93981	34.469	51.6443
T047578	HICLINC249	-0.1253	0.27	0.93981	5.10047	15.2818
T098227	HICLINC297	-0.1046	0.27	0.93981	92.9107	122.097
T073016	CAT1466.1	0.1039	0.28	0.93981	9.63235	24.7196
T272008	OVAT49	-0.0961	0.28	0.93981	14.5118	20.7852
T334257	AMAT69	-0.10522	0.28	0.93981	41.2809	53.9626
T017152	MBAT107	0.1073	0.28	0.93981	252.999	309.834
T014165	KHCAT342	-0.1126	0.28	0.93981	7.97562	13.4233
T287545	CAT701.1	-0.1043	0.28	0.93981	55.5917	71.0886
T340972	MBAT84	-0.1029	0.28	0.93981	10.9704	16.0089
T339793	AMAT102	-0.1134	0.28	0.93981	95.3752	146.81
T233871	CAT2248	-0.1028	0.28	0.93981	295.052	429.686
T097866	CAT1625.2	0.1092	0.28	0.93981	58.7198	221.764
T355400	AMAT164	-0.118	0.28	0.93981	4.57026	6.42614
T064152	CVAT35	-0.103	0.28	0.93981	22.8852	32.8737
T330614	LINC01004.2	-0.1054	0.28	0.93981	6.34864	11.9759
T098209	CAT1629.2	0.1039	0.28	0.93981	207.643	289.459
T196769	CAT292	0.1038	0.28	0.93981	30.2095	39.4738
T180242	MBAT100	0.1036	0.28	0.93981	340.792	483.882
T366170	CAT1191	-0.1117	0.28	0.93981	3.9594	5.51353
T346681	CAT1057	0.10616	0.28	0.93981	85.275	140.359
T027468	KCCAT312	-0.0989	0.28	0.93981	22.9807	43.2145
T208675	CAT371	-0.0995	0.28	0.93981	36.8911	45.4369
T250694	CAT448	-0.1064	0.28	0.93981	13.9037	21.087
T236518	CAT2267	-0.1084	0.28	0.93981	43.1629	134.598
T049499	CAT1307	-0.105	0.28	0.93981	16.2565	24.5332
T030831	CAT166	0.1062	0.28	0.93981	13.4644	24.1127
T277357	KHCAT12.1	0.1104	0.28	0.93981	14.9616	23.3102
T019217	BRCAT117	-0.108	0.28	0.93981	40.7795	59.0401
T104760	KHCAT89	0.1099	0.28	0.93981	4.67364	7.43077
T177938	NAPA-AS1.2	0.1062	0.28	0.93981	14.0752	30.3163
T087726	CAT1575.1	0.1033	0.28	0.93981	211.519	285.732
T024055	CAT130.2	0.1088	0.28	0.93981	50.913	169.646
T165237	CAT2039.3	-0.1143	0.28	0.93981	20.8483	38.1241
T319854	BRCAT281	0.1103	0.28	0.93981	2.40252	4.71981
T360248	PRCAT207	0.10933	0.28	0.93981	8.98384	14.5835
T292584	AMAT7	0.101	0.28	0.93981	45.044	55.6697
T290750	KCCAT34	0.109	0.28	0.93981	9.01304	14.5806
T305296	THCAT605	-0.1187	0.28	0.93981	1.72946	3.23895
T281235	LIFR-AS1.2	-0.1091	0.28	0.93981	64.4568	94.6622
T166771	TINCR.2	0.1086	0.28	0.93981	18.2809	49.0137
T059164	PRCAT71	0.1023	0.28	0.93981	6.24442	19.1683
T293149	HICLINC148	-0.107	0.28	0.93981	8.20515	11.5069
T313640	CAT881	0.0984	0.29	0.93981	15.5239	35.2228
T038492	CAT1242.1	-0.1074	0.29	0.93981	30.5241	56.2899
T186847	KCCAT574	-0.1005	0.29	0.93981	54.6381	68.8168
T188538	KHCAT367	-0.1022	0.29	0.93981	25.6339	38.3066
T309261	HRAT22	0.0966	0.29	0.93981	40.0547	53.1464
T078693	KHCAT452	-0.0999	0.29	0.93981	8.31299	13.7564
T173435	KCCAT165	-0.0992	0.29	0.93981	266.562	332.118
T068511	THCAT410	0.0988	0.29	0.93981	53.1877	69.525
T042721	CAT1267	-0.097	0.29	0.93981	98.2688	143.81
T073683	KCCAT127	-0.0994	0.29	0.93981	12.5448	18.22
T196762	CAT291.1	0.0982	0.29	0.93981	263.212	326.695
T074432	CAT1477.1	-0.1031	0.29	0.93981	17.533	27.2824
T190477	BRCAT417	-0.0984	0.29	0.93981	67.0336	105.503
T110424	CAT1703	-0.1031	0.29	0.93981	10.3138	13.8137
T321490	CAT922	-0.1058	0.29	0.93981	14.1786	20.6622
T020268	BRCAT122	0.1133	0.29	0.93981	8.12974	24.733
T056354	BDNF-AS	-0.1083	0.29	0.93981	13.2462	21.9975
T195370	THCAT499	-0.0995	0.29	0.93981	36.0947	48.4284
T353116	CAT1114.2	-0.0965	0.29	0.93981	32.0478	61.5257
T138033	LACAT233	0.1013	0.29	0.93981	3.912	9.34459
T119156	ESAT113	0.1037	0.29	0.93981	134.588	177.624
T036334	CAT1223	0.1098	0.29	0.93981	37.7876	158.789
T030338	CAT162.1	0.099	0.29	0.93981	703.655	947.428
T073832	CAT1472.2	-0.1104	0.29	0.93981	17.2682	54.4123
T078703	CAT1517.1	0.1104	0.29	0.93981	3.9429	8.2999
T153884	CAT1976	-0.1055	0.29	0.93981	10.585	17.1313
T189056	KHCAT16	0.1081	0.29	0.93981	5.3578	36.6638
T343933	MPAT13	-0.10845	0.29	0.93981	679.538	1149.31
T217216	CAT2164.1	-0.1045	0.29	0.93981	167.049	257.909
T295906	CVAT15	-0.1003	0.29	0.93981	46.1873	69.6561
T356436	MIR31HG.1	-0.117	0.29	0.93981	6.31332	18.3177
T260354	KCCAT261	-0.1103	0.29	0.93981	8.71076	27.7157
T130235	CAT1845.3	-0.1037	0.29	0.93981	31.4438	46.9404
T211022	KPCAT110	0.0979	0.29	0.93981	2.43075	3.38859
T347694	CAT1063	0.1024	0.29	0.93981	4.93225	9.01201
T172966	KHCAT3.1	0.1042	0.29	0.93981	26.95	55.957
T125769	MBAT96	0.1066	0.29	0.93981	57.9187	74.5635
T317639	SMAT28	-0.1054	0.29	0.93981	13.5742	23.6208
T272378	HHIP-AS1.1	0.10236	0.29	0.93981	5.52997	9.18328
T216448	CAT2159	0.1052	0.29	0.93981	22.928	35.3737
T321739	CAT928	-0.1023	0.29	0.93981	9.8332	14.7588
T158356	KCCAT29	0.1056	0.29	0.93981	25.1799	59.3985
T124926	CAT1805	-0.1017	0.29	0.93981	99.4541	127.288
T216115	CAT2155	-0.1023	0.29	0.93981	12.4247	17.8225
T140209	HNCAT38	-0.103	0.29	0.93981	2.39814	7.06109
T291191	MIR143HG.1	0.1125	0.3	0.93981	14.4922	25.4513
T048595	PDCD4-AS1	-0.1083	0.3	0.93981	27.9173	59.8969
T238488	HRAT84	-0.1095	0.3	0.93981	2.52507	4.86095
T002331	THCAT594	0.1012	0.3	0.93981	3.1154	3.87465
T267548	CAT569.1	0.1078	0.3	0.93981	12.2972	19.4116
T217484	CAT2166	-0.0958	0.3	0.93981	65.7952	128.644
T229471	LINC00896	-0.1119	0.3	0.93981	6.73003	16.0904
T025160	DNM3OS.1	0.1018	0.3	0.93981	95.3065	165.494
T358570	CRAT48	-0.1004	0.3	0.93981	77.8945	109.426
T257712	CAT498	-0.1023	0.3	0.93981	44.0832	54.7639
T138190	KCCAT263	-0.1061	0.3	0.93981	4.41168	6.617
T319945	CAT911	-0.1065	0.3	0.93981	21.2393	42.8987
T048821	BRCAT380	-0.1025	0.3	0.93981	65.2782	82.08
T033266	CAT189.1	0.1067	0.3	0.93981	21.901	35.4155
T190670	CAT252.1	-0.101	0.3	0.93981	18.3031	24.802
T142944	CAT1912	-0.1011	0.3	0.93981	31.5805	41.752
T293002	CAT743	-0.0941	0.3	0.93981	27.6571	44.969
T020048	CAT109	0.0983	0.3	0.93981	22.6438	42.1095
T258422	AMAT57	0.1008	0.3	0.93981	7.42354	9.61041
T117476	CAT1756.2	-0.1064	0.3	0.93981	11.5788	17.099
T186337	SMAT29	-0.09506	0.3	0.93981	87.9662	116.797
T197996	CAT302.1	0.1037	0.3	0.93981	30.0155	66.9515
T089589	CAT1581	0.1003	0.3	0.93981	19.4565	25.3748
T169468	CAT2070.2	0.0969	0.3	0.93981	107.96	138.402
T348722	CAT1075	-0.0971	0.3	0.93981	8.5133	23.0907
T023592	CAT129	0.1057	0.3	0.93981	235.065	300.99
T036557	UTAT40	-0.0986	0.3	0.93981	481.289	613.543
T320330	CAT913	-0.0965	0.3	0.93981	59.236	97.309
T330641	OVAT3	-0.104	0.3	0.93981	20.3516	29.0088
T149369	CAT1942	-0.0992	0.3	0.93981	7.59451	14.0324
T089166	CAT1580	-0.1005	0.3	0.93981	22.2777	41.7197
T190140	ESAT114	-0.1066	0.3	0.93981	51.3338	68.9054
T166584	BRCAT265	-0.1115	0.3	0.93981	12.825	22.1539
T118763	CAT1768.3	0.1115	0.3	0.93981	35.5721	98.8102
T365359	CAT1186.2	-0.1016	0.3	0.93981	33.6116	82.0301
T364217	KHCAT432	0.111	0.3	0.93981	3.60041	14.5333
T145493	CAT1925	0.0945	0.3	0.93981	59.6925	81.4009
T225277	IL10RB-AS1.1	-0.0965	0.3	0.93981	417.356	550.504
T178865	KCCAT391	-0.0956	0.3	0.93981	52.9108	68.3596
T138942	KHCAT19.2	-0.0992	0.3	0.93981	14.2585	21.7463
T241592	KCCAT364	-0.102	0.3	0.93981	27.5554	39.9715
T344044	CAT1041.3	0.106	0.3	0.93981	2.01589	3.93498
T225754	HNCAT41.3	0.1088	0.3	0.93981	4.28305	7.03438
T380720	KCCAT442.1	0.0971	0.3	0.93981	36.072	49.3193
T196663	MEAT113	-0.09882	0.3	0.93981	15.9312	25.4358
T281859	BRCAT54.3	-0.1013	0.3	0.93981	69.5708	1210.11
T117345	CAT1755	-0.1004	0.3	0.93981	33.7885	45.3589
T094828	CAT1617.2	-0.0977	0.3	0.93981	9.89317	17.2685
T019169	PRCAT150	-0.0997	0.3	0.93981	340.236	467.495
T048756	HICLINC251.2	0.1012	0.3	0.93981	19.6307	23.9124
T146120	HICLINC339	-0.1019	0.3	0.93981	23.3396	31.3018
T290017	HICLINC140.1	-0.0999	0.3	0.93981	336.485	442.658
T074099	CAT1473.2	-0.1003	0.31	0.93981	271.696	389.75
T008165	THCAT20	-0.0987	0.31	0.93981	299.112	360.463
T043563	UNC5B-AS1.1	-0.1089	0.31	0.93981	3.38284	7.47748
T353902	CAT1122	-0.1002	0.31	0.93981	64.3007	99.883
T234182	CAT2250.2	-0.1051	0.31	0.93981	92.7386	313.004
T030615	CAT165	-0.102	0.31	0.93981	3.69058	6.42475
T221402	THCAT64	-0.1005	0.31	0.93981	7.06069	21.3839
T122207	CAT1787	-0.09335	0.31	0.93981	23.3981	29.5201
T266800	CAT564	-0.1037	0.31	0.93981	10.3085	13.7946
T244790	MAGI1-AS1	-0.0987	0.31	0.93981	50.5041	85.6675
T184375	CAT208	0.0997	0.31	0.93981	2.94707	6.25498
T272834	CAT593.2	-0.0973	0.31	0.93981	21.2777	27.3538
T100139	CAT1637	-0.0953	0.31	0.93981	10.676	21.6643
T175544	THCAT268	-0.0946	0.31	0.93981	8.99412	12.9886
T186359	CAT217	-0.0933	0.31	0.93981	54.5493	82.6315
T346682	PRCAT51	0.1018	0.31	0.93981	117.462	200.66
T047874	AMAT163	-0.1029	0.31	0.93981	3.11029	4.41476
T118355	CAT1765	-0.0939	0.31	0.93981	43.2787	54.4412
T199192	KCCAT79.2	0.0936	0.31	0.93981	4.33523	7.36307
T270635	OVAT250	0.0994	0.31	0.93981	5.66483	6.97091
T131773	AMAT127	0.0953	0.31	0.93981	2.33209	3.45158
T374064	UTAT64	-0.1011	0.31	0.93981	1.97877	2.54151
T267078	BRCAT289	-0.0985	0.31	0.93981	3.3515	4.70602
T006495	CMAT3	-0.0998	0.31	0.93981	6.67853	9.21846
T281631	CAT655.1	-0.1071	0.31	0.93981	55.3929	120.949
T064932	CVAT22	-0.0972	0.31	0.93981	18.1094	23.7724
T042585	MEAT137	-0.0977	0.31	0.93981	20.5073	30.5887
T342079	CAT1023.2	-0.1014	0.31	0.93981	48.6516	108.135
T252346	CAT457.5	0.1024	0.31	0.93981	2.72971	6.26105
T049891	LACAT140	0.0982	0.31	0.93981	3.69758	4.98914
T357710	PNAT122	-0.103	0.31	0.93981	4.94961	18.0221
T171495	MBAT65	0.0993	0.31	0.93981	26.5136	39.938
T019535	PRCAT300	-0.10361	0.31	0.93981	24.8897	52.2804
T225274	KCCAT252	-0.0989	0.31	0.93981	14.538	21.5392
T259126	CAT505.1	-0.11	0.31	0.93981	223.671	649.541
T122239	PRC1-AS1	0.1	0.31	0.93981	25.8192	38.1453
T012264	CAT59	-0.09972	0.31	0.93981	68.8643	93.3404
T163665	KCCAT207	0.1049	0.31	0.93981	3.48542	4.81535
T249192	CAT438	-0.0942	0.31	0.93981	79.4577	99.2414
T009559	KDM4A-AS1.1	0.1014	0.31	0.93981	4.28437	5.95401
T034733	MBAT86	0.0975	0.31	0.93981	141.348	175.051
T311916	LINC00271.2	-0.0965	0.31	0.93981	7.56009	12.1029
T354705	CAT1125.3	-0.1018	0.31	0.93981	25.697	40.5649
T218701	BRCAT322	0.0923	0.32	0.93981	78.1822	104.774
T085771	CAT1567	-0.0966	0.32	0.93981	42.471	54.8691
T110327	MEG3.2	0.0994	0.32	0.93981	23.8317	41.0915
T074090	CAT1473.1	-0.0897	0.32	0.93981	46.9765	94.0107
T196766	KCCAT87	0.0956	0.32	0.93981	10.089	12.6798
T351417	CAT1100.1	-0.0955	0.32	0.93981	60.3654	110.93
T175957	CAT2107	0.1057	0.32	0.93981	13.8792	30.9784
T232812	KHCAT21.2	-0.0938	0.32	0.93981	60.6611	82.3214
T350817	KHCAT206	0.0918	0.32	0.93981	14.4028	24.5069
T286846	MBAT95	-0.099	0.32	0.93981	22.288	30.5904
T037819	CAT1235.2	-0.09308	0.32	0.93981	100.8	135.001
T296589	PRCAT13.3	-0.1032	0.32	0.93981	34.198	51.787
T120550	CAT1777	-0.0983	0.32	0.93981	28.7138	58.9924
T083975	CAT1558	-0.098	0.32	0.93981	25.1968	37.8679
T153012	LACAT7.1	-0.1029	0.32	0.93981	10.0406	15.7673
T075893	CAT1491	-0.0999	0.32	0.93981	131.852	173.409
T078886	CAT1520.2	-0.10133	0.32	0.93981	73.3684	111.737
T140992	UTAT34	-0.1036	0.32	0.93981	5.74979	7.71965
T072489	CAT1465.2	0.0985	0.32	0.93981	6.10059	9.30397
T098015	CAT1626	-0.0967	0.32	0.93981	484.716	708.37
T037147	CAT1229	-0.0881	0.32	0.93981	49.9125	66.6623
T012272	CAT60.1	-0.0973	0.32	0.93981	28.8002	47.705
T366813	BRCAT428	0.0959	0.32	0.93981	58.7873	75.7385
T048848	CAT1305.2	0.0988	0.32	0.93981	12.9304	24.0072
T017040	MBAT23	-0.0939	0.32	0.93981	194.106	238.058
T276533	CRAT50	0.088	0.32	0.93981	79.0213	103.283
T044194	CAT1277	0.1003	0.32	0.93981	37.1068	46.0326
T262604	CAT530	-0.099	0.32	0.93981	4.93582	9.54873
T031788	CAT175.1	-0.0971	0.32	0.93981	12.9854	20.1446
T302913	OVAT152	-0.1005	0.32	0.93981	46.9291	71.1132
T106737	CAT1684.1	-0.1056	0.32	0.93981	20.7339	31.0268
T006967	HRAT2	-0.1002	0.32	0.93981	26.5315	33.2929
T085945	LACAT199	-0.0984	0.32	0.93981	5.09407	7.10602
T112011	BRCAT35	-0.1022	0.32	0.93981	17.474	102.843
T092266	CAT1592	0.0979	0.32	0.93981	21.1615	28.4493
T334320	CAT986	0.0978	0.32	0.93981	10.2578	13.7867
T363120	LACAT240	0.0913	0.32	0.93981	85.9104	107.314
T189076	PNAT96	0.0994	0.32	0.93981	11.4713	19.1398
T175450	THCAT353	-0.1049	0.32	0.93981	2.43464	4.54055
T322740	KHCAT26	0.099	0.32	0.93981	5.81124	9.98103
T003062	BRCAT354	-0.0932	0.32	0.93981	4.62986	6.04738
T036024	HNCAT133	0.1006	0.32	0.93981	8.68292	13.4439
T009282	CAT41	0.099	0.32	0.93981	6.43754	10.6636
T225507	CAT2206.3	-0.0953	0.32	0.93981	38.992	67.9859
T243460	KHCAT11	-0.0954	0.32	0.93981	81.5439	107.618
T060299	CAT1365.2	0.10023	0.32	0.93981	5.38161	12.7012
T342923	CAT1033	-0.0964	0.32	0.93981	51.1318	102.901
T146739	OVAT247	0.0915	0.32	0.93981	157.104	281.967
T294365	KCCAT41	-0.0905	0.32	0.93981	17.9463	22.9135
T039526	KCCAT486	-0.09221	0.32	0.93981	25.4511	32.7537
T323519	KCCAT24.4	-0.1038	0.32	0.93981	4.62383	8.53988
T098885	LINC01067	-0.0955	0.32	0.93981	8.30638	12.5664
T302037	AMAT33	-0.0987	0.32	0.93981	84.0162	103.534
T357426	AMAT134	-0.09721	0.32	0.93981	6.85987	9.5957
T049521	UTAT56	-0.0998	0.32	0.93981	10.6945	14.9557
T223557	HICLINC383	-0.0959	0.32	0.93981	38.0135	62.1837
T159183	CAT2003.1	-0.0949	0.33	0.93981	87.5539	147.282
T309955	CAT854.3	-0.1027	0.33	0.93981	5.52284	10.276
T105518	KCCAT387	-0.0953	0.33	0.93981	73.6026	90.5825
T002647	OVAT76	-0.0958	0.33	0.93981	2.2944	4.1814
T163561	CAT2029.1	0.0931	0.33	0.93981	41.4122	103.76
T253312	CAT464	0.0923	0.33	0.93981	169.436	199.865
T142346	CAT1908	-0.0942	0.33	0.93981	181.922	240.504
T346024	AMAT104	-0.0889	0.33	0.93981	26.6004	33.6666
T382248	CAT2321	0.0951	0.33	0.93981	42.4656	58.431
T258261	LINC00885.1	0.09322	0.33	0.93981	30.615	52.2869
T153055	CAT1968.2	-0.0965	0.33	0.93981	94.4359	125.874
T117659	KCCAT661	-0.0899	0.33	0.93981	4.6967	7.37214
T349869	PNAT110	-0.09	0.33	0.93981	631.691	1019.72
T334373	PRCAT159	-0.0975	0.33	0.93981	18.8448	28.5766
T010948	CAT51.1	-0.0919	0.33	0.93981	48.218	78.9904
T186721	CRAT5	0.0919	0.33	0.93981	23.8	28.6477
T272837	CAT594.1	-0.0952	0.33	0.93981	32.5101	46.3132
T171030	THCAT615	-0.09626	0.33	0.93981	2.97353	4.95366
T140017	LGAT2	-0.0921	0.33	0.93981	10.7878	15.1829
T358160	CAT1141.1	0.0961	0.33	0.93981	114.261	165.014
T274020	BRCAT336	-0.094	0.33	0.93981	35.1319	52.6109
T137853	KHCAT142	0.0912	0.33	0.93981	14.1077	21.8219
T029635	CAT159.1	-0.098	0.33	0.93981	93.7648	2033.97
T124914	CAT1803.1	0.101	0.33	0.93981	4.87234	19.4333
T184386	BRCAT45	0.0919	0.33	0.93981	6.01462	13.0666
T215474	CAT2152.2	0.0977	0.33	0.93981	99.3147	170.928
T225451	STCAT11	0.0968	0.33	0.93981	12.3825	15.6241
T007374	KCCAT617	-0.0927	0.33	0.93981	67.7152	84.1472
T343001	KCCAT583	-0.0924	0.33	0.93981	46.1617	61.871
T281794	CAT656.4	0.0908	0.33	0.93981	42.0407	78.4611
T355830	CAT1134.2	0.0965	0.33	0.93981	42.5451	126.808
T320528	HOXA-AS2.2	-0.1058	0.33	0.93981	6.33452	12.8583
T064024	CAT1395	-0.09471	0.33	0.93981	11.763	19.8095
T343020	THCAT222	-0.0972	0.33	0.93981	6.38606	9.81722
T332663	CAT974	-0.0933	0.33	0.93981	29.4169	39.6174
T350656	BRCAT99	0.1003	0.33	0.93981	4.53177	14.9097
T019451	BRCAT22	-0.0968	0.33	0.93981	59.9032	84.1882
T082951	CAT1553.2	-0.0994	0.33	0.93981	25.2059	35.2502
T045977	LINC00865.2	-0.101	0.33	0.93981	18.9288	36.4123
T189011	THCAT370	-0.0886	0.33	0.93981	18.1086	22.3762
T140639	MEAT109	-0.101	0.33	0.93981	5.27742	17.1946
T062242	CAT1378.2	0.0983	0.33	0.93981	184.072	355.302
T079753	CAT1526	-0.0938	0.33	0.93981	29.1015	46.9654
T177854	CAT2117.1	0.1005	0.33	0.93981	7.25619	12.4425
T237117	MBAT82	-0.0951	0.33	0.93981	357.913	552.206
T145170	KCCAT80	0.0939	0.33	0.93981	24.3932	31.0195
T352639	KHCAT401	-0.0971	0.33	0.93981	14.1442	21.7388
T163669	KCCAT415	0.0978	0.33	0.93981	1.74017	2.5259
T164888	CAT2036.1	-0.0962	0.33	0.93981	20.8023	36.844
T066939	CAT1419	-0.0953	0.33	0.93981	47.8018	66.5407
T281074	CAT652	-0.092	0.33	0.93981	492.176	662.017
T144704	AMAT31	-0.0955	0.33	0.93981	35.0826	47.9378
T316057	OVAT108	-0.09519	0.33	0.93981	2.94001	7.89732
T114522	CAT1724.3	0.089	0.33	0.93981	89.8954	211.802
T062323	KCCAT508	-0.0945	0.33	0.93981	20.6301	29.8369
T151080	KCCAT400	0.0896	0.33	0.93981	141.59	203.593
T065407	CAT1407	0.0861	0.34	0.93981	18.6035	27.9629
T316759	CAT896	-0.0973	0.34	0.93981	150.258	229.365
T380633	THCAT368	0.0876	0.34	0.93981	15.34	19.7414
T206046	CAT354	-0.0948	0.34	0.93981	427.993	513.616
T290637	CAT726	-0.09461	0.34	0.93981	21.075	34.7444
T040646	BRCAT38	0.0958	0.34	0.93981	34.7751	96.8622
T203608	STCAT25	-0.0916	0.34	0.93981	6.50659	8.46801
T281010	NADK2-AS1	0.0948	0.34	0.93981	58.8764	81.5017
T056648	BRCAT144	0.0983	0.34	0.93981	2.99158	7.19518
T245856	CAT425	0.0971	0.34	0.93981	72.0503	93.2181
T052079	CAT1323	-0.0933	0.34	0.93981	133.744	220.048
T019914	THCAT208	-0.1014	0.34	0.93981	1.71527	3.09331
T326446	KCCAT291	-0.0962	0.34	0.93981	2.87374	4.63319
T048310	KCCAT599	0.0921	0.34	0.93981	7.63265	19.9684
T206811	CAT362.3	-0.09833	0.34	0.93981	9.15286	13.09
T067443	CAT1420	-0.09136	0.34	0.93981	3.24164	4.42892
T092173	CAT1590	-0.0917	0.34	0.93981	24.7715	34.875
T337675	CAT1002.2	-0.0909	0.34	0.93981	370.547	476.958
T219167	CAT2176.2	0.0926	0.34	0.93981	16.9217	260.946
T193261	THCAT7	0.09731	0.34	0.93981	3.20468	5.46792
T249140	AMAT151	-0.1031	0.34	0.93981	4.255	8.92521
T183157	PRCAT28.1	0.0957	0.34	0.93981	26.9387	50.1068
T207522	PNAT95.2	-0.0927	0.34	0.93981	7.92382	13.4073
T359270	BRCAT412	-0.0947	0.34	0.93981	50.5332	76.5622
T227447	KCCAT448	-0.0879	0.34	0.93981	75.5219	100.943
T052945	CAT1326	-0.09822	0.34	0.93981	11.2295	15.5043
T012894	GNG12-AS1.5	-0.0963	0.34	0.93981	5.51148	8.83377
T147184	HNCAT206	-0.0985	0.34	0.93981	14.1465	31.5465
T315150	LINC00473.1	0.0962	0.34	0.93981	8.46481	40.9359
T152336	CAT1966.1	-0.0917	0.34	0.93981	20.7556	27.2081
T325587	KHCAT245	0.0958	0.34	0.93981	7.43178	13.9241
T336992	MNX1-AS1.2	-0.09363	0.34	0.93981	35.8626	97.5083
T274474	THCAT17	-0.1008	0.34	0.93981	13.2306	21.0922
T363206	THCAT539	0.0923	0.34	0.93981	15.7237	20.3972
T367340	CAT1202.2	0.0933	0.34	0.93981	21.6375	27.8341
T048268	BLCAT8	-0.104	0.34	0.93981	4.62108	57.233
T208536	CAT369	-0.0858	0.34	0.93981	84.0198	257.983
T104423	CAT1663	-0.091	0.34	0.93981	63.014	88.6567
T216482	CAT2161	-0.0929	0.34	0.93981	137.255	172.565
T204732	THCAT389	-0.0978	0.34	0.93981	4.06352	7.05228
T167422	CAT2056	-0.0927	0.34	0.93981	89.8269	115.119
T188864	KCCAT518	0.0923	0.34	0.93981	11.5711	16.9974
T351931	AMAT145	0.0964	0.34	0.93981	10.6273	15.9322
T184394	CAT210	0.0906	0.34	0.93981	58.6589	125.018
T189930	HICLINC44.1	0.0955	0.34	0.93981	3.90034	5.21325
T324337	CAT939	-0.0841	0.35	0.93981	50.3066	67.2115
T364547	KHCAT138.1	0.0847	0.35	0.93981	17.7945	26.6806
T375615	CVAT28	-0.0929	0.35	0.93981	4.97514	7.83117
T181757	CVAT26	-0.0893	0.35	0.93981	14.2865	19.1116
T295238	LINC00847.1	-0.094	0.35	0.93981	86.0688	183.878
T328391	CAT957	-0.0947	0.35	0.93981	19.3151	28.2188
T075627	CAT1484.3	-0.089	0.35	0.93981	140.573	215.178
T180581	CAT2130	0.0906	0.35	0.93981	720.287	882.37
T243100	CAT407.1	-0.0903	0.35	0.93981	138.596	195.026
T102768	CAT1650	-0.0874	0.35	0.93981	43.917	55.868
T212847	UBOX5-AS1.1	0.0862	0.35	0.93981	4.39405	5.8562
T223728	BRCAT414	-0.0942	0.35	0.93981	5.12815	9.55978
T118026	AMAT119	0.091	0.35	0.93981	6.43996	8.1522
T055912	NAV2-AS2.1	0.0927	0.35	0.93981	20.5128	36.6444
T135594	OVAT112	-0.0902	0.35	0.93981	13.9422	22.5775
T084817	PNAT113	0.0884	0.35	0.93981	9.24121	16.3019
T319605	CAT909.2	-0.09502	0.35	0.93981	117.981	313.323
T064376	LSCAT126.1	0.09069	0.35	0.93981	8.2943	21.6259
T230111	CMAT15	-0.0899	0.35	0.93981	27.1946	37.1196
T030860	CAT167.2	0.091	0.35	0.93981	20.9731	36.4257
T360964	BRCAT405	0.0918	0.35	0.93981	2.8153	4.18014
T122189	CAT1786	-0.0904	0.35	0.93981	27.0912	31.9329
T120974	KHCAT255	-0.0954	0.35	0.93981	6.62644	11.342
T281844	CAT658	-0.093	0.35	0.93981	9.53173	101.462
T347941	CAT1065.2	-0.0921	0.35	0.93981	129.863	207.253
T277602	CAT635	-0.0948	0.35	0.93981	9.88446	19.6097
T153125	CAT1969.2	-0.0918	0.35	0.93981	8.55855	19.2646
T081866	CAT1546	0.091	0.35	0.93981	356.168	527.078
T343733	CAT1038	-0.0901	0.35	0.93981	79.7613	123.184
T257508	CAT495.3	-0.0924	0.35	0.93981	26.5196	51.7494
T028138	CAT152.1	-0.0914	0.35	0.93981	65.8568	112.567
T290661	CAT729	-0.0937	0.35	0.93981	6.29929	9.33139
T006598	SNHG12.4	-0.0893	0.35	0.93981	82.735	105.729
T092074	CAT1589	0.0882	0.35	0.93981	30.3378	39.3808
T154235	CAT1979	-0.0938	0.35	0.93981	113.488	178.15
T117239	CAT1752	-0.0945	0.35	0.93981	5.28624	13.6988
T291552	CAT733.2	0.0924	0.35	0.93981	7.99362	12.3803
T334988	THCAT393	-0.097	0.35	0.93981	4.86579	7.03421
T309276	KHCAT399.2	0.0901	0.35	0.93981	2.93297	4.28516
T093420	KHCAT335	-0.0886	0.35	0.93981	14.6319	20.1328
T187220	CAT224.2	0.0918	0.35	0.93981	22.0268	29.2899
T262435	CAT528	0.09509	0.35	0.93981	7.66301	42.9586
T279346	CAT646	0.0881	0.35	0.93981	27.5481	63.2074
T225913	CAT2209	0.0903	0.35	0.93981	85.7674	134.448
T089900	AMAT15	-0.0914	0.35	0.93981	37.1622	46.0365
T155935	CAT1983.5	0.09624	0.35	0.93981	23.3512	53.2243
T272045	HRAT7	-0.0956	0.35	0.93981	14.2481	19.4403
T378589	CAT2301	-0.091	0.35	0.93981	9.30588	13.3364
T015476	CAT79	0.0902	0.35	0.93981	83.1745	150.839
T128248	MEAT101.2	-0.0874	0.36	0.93981	29.6616	71.4049
T061397	CAT1374.1	-0.0875	0.36	0.93981	11.6208	16.3926
T307745	CAT837	-0.0849	0.36	0.93981	351.459	460.006
T052341	AMAT13	-0.0856	0.36	0.93981	57.6414	72.5481
T260018	CAT510.1	0.0896	0.36	0.93981	14.8657	51.552
T205783	THCAT319	0.0915	0.36	0.93981	139.093	240.319
T248563	CAT434	0.0884	0.36	0.93981	633.274	899.863
T332019	LACAT119	0.0873	0.36	0.93981	6.5735	15.801
T061741	AMAT78	0.086	0.36	0.93981	20.2989	27.2407
T258262	LINC00885.2	0.08958	0.36	0.93981	20.0696	40.8613
T312365	CAT870.2	-0.0891	0.36	0.93981	25.0758	38.3717
T364389	PRCAT37.3	0.0921	0.36	0.93981	2.10199	4.18442
T004492	KCCAT616	-0.0868	0.36	0.93981	162.519	199.604
T366549	CAT1195.2	-0.0926	0.36	0.93981	7.4904	28.3489
T297295	CAT767	-0.0844	0.36	0.93981	45.3441	56.2357
T006619	SNHG12.2	-0.0853	0.36	0.93981	58.9479	73.7146
T363122	LINC00092	-0.0847	0.36	0.93981	16.229	38.9669
T287340	EPB41L4A-AS1.1	-0.0917	0.36	0.93981	267.768	357.949
T237125	BRCAT84	0.0919	0.36	0.93981	4.89109	7.95359
T218918	CAT2173	0.0879	0.36	0.93981	3.23083	14.8262
T238041	CAT385.2	-0.0924	0.36	0.93981	97.5396	143.946
T066414	CAT1417	0.0871	0.36	0.93981	605.097	764.61
T218272	OSER1-AS1.2	0.0938	0.36	0.93981	10.9385	16.522
T132708	KCCAT273	0.084	0.36	0.93981	4.35281	8.64154
T259280	KPCAT2.1	-0.08824	0.36	0.93981	40.5383	59.5114
T245056	FOXP1-AS1.2	-0.0853	0.36	0.93981	12.4575	17.6388
T030165	FLVCR1-AS1	-0.0851	0.36	0.93981	22.0304	26.6394
T153126	CAT1969.1	0.0845	0.36	0.93981	9.99584	21.8146
T298139	CAT776	-0.0904	0.36	0.93981	284.762	358.398
T166442	THCAT221	-0.0929	0.36	0.93981	45.2322	63.1307
T014435	CAT74	-0.0902	0.36	0.93981	33.3602	41.0983
T156338	KCCAT612	-0.0932	0.36	0.93981	21.0211	29.6173
T374457	LSCAT135	0.0906	0.36	0.93981	59.7453	72.3798
T090930	KCCAT353	-0.0906	0.36	0.93981	113.378	155.018
T003448	CAT19.3	0.0917	0.36	0.93981	5.73782	11.8988
T043645	CAT1272	-0.0883	0.36	0.93981	21.3269	33.8472
T339483	CAT1009.1	-0.0955	0.36	0.93981	95.6888	147.105
T081143	AMAT79	-0.0852	0.36	0.93981	45.752	60.4631
T333338	CAT977.1	-0.0876	0.36	0.93981	140.235	177.978
T189074	CAT238	0.08583	0.36	0.93981	150.879	210.485
T054279	CAT1335	-0.09309	0.36	0.93981	6.17165	8.57115
T228577	KCCAT665.2	0.08999	0.36	0.93981	111.914	445.747
T319959	CAT912	-0.0821	0.36	0.93981	59.9594	75.8712
T065380	CAT1406.1	-0.0922	0.36	0.93981	14.9604	23.2223
T133492	CRAT4	0.0903	0.36	0.93981	13.9303	21.8362
T302159	CAT793.3	-0.0948	0.36	0.93981	129.689	188.951
T083984	CAT1559.2	-0.0869	0.36	0.93981	267.237	338.378
T335777	CAT995	-0.09161	0.36	0.93981	9.06707	14.3669
T157483	MBAT73	-0.088	0.36	0.93981	86.6402	125.713
T041036	AMAT110	-0.087	0.36	0.93981	15.3524	26.42
T218062	CAT2168.2	-0.0939	0.36	0.93981	40.6621	1887.58
T022373	CAT121.2	-0.0881	0.36	0.93981	25.7871	43.6666
T313012	CAT876	-0.0875	0.36	0.93981	34.3688	60.5507
T248583	HICLINC91.2	-0.0871	0.36	0.93981	8.48002	14.1332
T274516	CAT605	-0.0865	0.37	0.93981	32.6802	46.0368
T252689	MBNL1-AS1.2	-0.0846	0.37	0.93981	44.5376	72.4725
T018355	CAT97.2	-0.0816	0.37	0.93981	155.955	201.403
T021357	CAT114.1	0.0866	0.37	0.93981	35.7054	56.1089
T000790	CAT4.1	-0.09259	0.37	0.93981	25.4383	51.1319
T138855	VPS9D1-AS1.2	-0.0937	0.37	0.93981	144.291	278.867
T272951	CAT596.2	-0.0811	0.37	0.93981	24.5889	33.5762
T322753	KCCAT512	-0.087	0.37	0.93981	364.304	475.719
T312320	CAT869	-0.0854	0.37	0.93981	19.6401	41.8887
T167996	CAT2061	-0.09437	0.37	0.93981	12.1408	20.4858
T353735	CAT1119	0.0852	0.37	0.93981	21.9692	32.142
T112299	HNCAT174	0.088	0.37	0.93981	8.57734	11.5078
T356679	THCAT369.1	-0.0899	0.37	0.93981	5.64578	21.6466
T314485	KCCAT75	0.0826	0.37	0.93981	35.4365	50.2603
T241242	LVCAT21	-0.0844	0.37	0.93981	11.255	15.5223
T088006	CAT1577.1	-0.088	0.37	0.93981	388.873	506.371
T001690	TP73-AS1.1	-0.0837	0.37	0.93981	505.118	608.602
T330024	HNCAT59	-0.0884	0.37	0.93981	41.7252	72.5616
T012274	CAT61	-0.0907	0.37	0.93981	229.741	343.368
T241093	THCAT365	-0.0875	0.37	0.93981	32.2113	45.7646
T240503	CAT398	-0.0897	0.37	0.93981	13.6814	17.5021
T110171	CAT1702	0.0903	0.37	0.93981	19.8177	32.2097
T165113	LSCAT118	0.0826	0.37	0.93981	6.6546	10.9446
T143792	KHCAT120	0.0871	0.37	0.93981	41.921	57.6488
T067663	CAT1425.2	-0.0919	0.37	0.93981	68.8271	111.524
T022607	BRCAT140	0.0908	0.37	0.93981	4.78027	7.99388
T182606	PRCAT130	0.0884	0.37	0.93981	10.1437	14.5863
T244169	KHCAT183	-0.0837	0.37	0.93981	10.1481	13.3218
T252785	KCCAT39	-0.0881	0.37	0.93981	9.51975	12.9606
T262269	CAT525.2	0.0868	0.37	0.93981	14.4571	25.4629
T042582	MEAT134	-0.0892	0.37	0.93981	26.5446	40.4996
T277358	KHCAT12.2	0.091	0.37	0.93981	14.768	22.9615
T118567	KCCAT542	0.0867	0.37	0.93981	56.2709	76.2083
T114875	CAT1729.4	-0.088	0.37	0.93981	71.5235	100.797
T162261	BRCAT296	-0.0838	0.37	0.93981	5.92462	8.03431
T301550	CAT788	0.0829	0.37	0.93981	234.024	283.229
T280801	PRCAT124	-0.0882	0.37	0.93981	30.8344	59.1982
T018800	CAT101.3	0.0915	0.37	0.93981	4.92398	10.0644
T107619	THCAT422.1	-0.092	0.37	0.93981	6.21105	9.06507
T356625	CAT1137	0.0851	0.37	0.93981	33.2485	41.2834
T219714	CAT2180.4	-0.0877	0.37	0.93981	13.4319	24.4081
T052785	KRTAP5-AS1	-0.097	0.37	0.93981	100.767	217.951
T135320	KCCAT158	-0.0893	0.37	0.93981	2.15308	6.30347
T289970	KCCAT443	0.0899	0.37	0.93981	2.13242	4.47506
T127323	CAT1817	-0.0901	0.37	0.93981	13.8452	50.5689
T285614	CVAT20	-0.0891	0.37	0.93981	17.6261	26.0341
T110859	MPAT9	-0.0903	0.37	0.93981	26.27	34.0511
T169153	CAT2068	0.0924	0.37	0.93981	476.482	568.121
T351742	KCCAT622	0.084	0.37	0.93981	21.1152	33.1198
T367411	CAT1204.6	-0.0893	0.37	0.93981	40.2133	57.1976
T034479	THCAT383	-0.0889	0.37	0.93981	20.3316	38.2995
T144961	CAT1922.2	-0.0889	0.37	0.93981	12.1459	17.9244
T187043	CMAT11	-0.08524	0.37	0.93981	10.5228	15.7598
T168316	MEAT145	0.0889	0.37	0.93981	5.84438	7.44039
T192140	LBX2-AS1.3	-0.085	0.37	0.93981	85.4535	112.606
T348280	CAT1070	-0.0804	0.38	0.93981	29.0472	45.8794
T250117	KHCAT78	0.0873	0.38	0.93981	15.5074	76.5166
T241117	SNRK-AS1	-0.0845	0.38	0.93981	88.9071	105.625
T031012	CAT170.2	0.0921	0.38	0.93981	6.02898	12.0519
T219477	ZFAS1.1	-0.0845	0.38	0.93981	1157.24	1510.37
T141985	CAT1907	-0.0811	0.38	0.93981	18.8898	29.7003
T238557	FGD5-AS1.3	0.0831	0.38	0.93981	713.066	899.827
T250319	H1FX-AS1.1	-0.08168	0.38	0.93981	70.0305	87.6397
T231741	LSCAT12	0.0913	0.38	0.93981	3.42525	6.83563
T282884	LSCAT279	0.0778	0.38	0.93981	9.7687	19.9569
T256551	LSCAT87	0.0847	0.38	0.93981	16.3514	21.8508
T042841	OVAT58	-0.0826	0.38	0.93981	11.9724	18.8343
T165229	BRCAT57	-0.0892	0.38	0.93981	13.5229	21.578
T102606	OVAT48	0.0846	0.38	0.93981	6.95897	10.15
T002637	OVAT85	-0.0916	0.38	0.93981	6.65359	9.74004
T000779	OVAT106.2	-0.0843	0.38	0.93981	17.7379	35.5693
T024798	CAT135	0.0827	0.38	0.93981	92.965	115.307
T110091	MEAT131	0.0851	0.38	0.93981	15.9698	21.5274
T048735	OVAT155	0.0892	0.38	0.93981	3.44407	5.66531
T295065	AMAT3	0.0798	0.38	0.93981	120.526	152.021
T290970	CAT731	0.0852	0.38	0.93981	63.7075	141.825
T170487	CAT2078	0.0861	0.38	0.93981	9.74234	32.5631
T167141	MEAT127	-0.09068	0.38	0.93981	26.0259	33.2932
T066908	BRCAT34	-0.0831	0.38	0.93981	9.8789	89.1724
T285215	VCAN-AS1	0.0871	0.38	0.93981	609.72	845.592
T252691	LACAT175	-0.0938	0.38	0.93981	4.70882	9.68629
T164908	THCAT496	-0.0825	0.38	0.93981	157.2	208.448
T166627	KCCAT464	-0.0851	0.38	0.93981	5.51464	7.9162
T064023	CAT1394	-0.08211	0.38	0.93981	171.434	231.704
T347611	CAT1062.2	0.08077	0.38	0.93981	1296.8	1645.16
T014434	BRCAT377	0.0817	0.38	0.93981	6.5243	8.63993
T328268	CAT954	-0.0853	0.38	0.93981	37.7829	50.894
T143770	GBAT9	-0.088	0.38	0.93981	3.29255	6.60124
T150404	BRCAT103	-0.0831	0.38	0.93981	184.969	275.321
T043575	BRCAT146	-0.0928	0.38	0.93981	10.826	20.2783
T341586	CAT1021	-0.0864	0.38	0.93981	18.0594	47.58
T056985	CAT1350.3	-0.0863	0.38	0.93981	606.6	1507.48
T165230	CAT2039.2	-0.0889	0.38	0.93981	11.1976	17.984
T281636	CAT655.2	-0.0867	0.38	0.93981	234.964	328.665
T267701	KCCAT44	-0.0932	0.38	0.93981	11.2543	21.1399
T174328	LINC00665.6	0.088	0.38	0.93981	584.964	803.873
T046156	TNKS2-AS1	0.08134	0.38	0.93981	9.67891	16.5333
T216008	BRCAT112	0.0901	0.38	0.93981	3.45125	5.94395
T193829	KCCAT347	0.08421	0.38	0.93981	70.3842	91.4652
T345224	CAT1053.4	-0.0875	0.38	0.93981	10.4687	16.6045
T077107	THCAT87	0.0926	0.38	0.93981	2.83209	6.47358
T163288	THCAT598	-0.0989	0.38	0.93981	3.50167	7.45733
T340634	KCCAT306	-0.0866	0.38	0.93981	9.52503	20.1755
T281746	LACAT269	0.0905	0.38	0.93981	6.76931	10.4535
T002836	HNCAT129	-0.0891	0.38	0.93981	5.24916	11.0398
T260587	THCAT177	-0.087	0.38	0.93981	16.9988	24.5227
T300589	MDC1-AS1	0.0812	0.38	0.93981	67.7431	89.2149
T226054	CAT2211	-0.0941	0.38	0.93981	2.99513	4.78925
T281871	BRCAT77.1	-0.0911	0.38	0.93981	68.0722	3654.57
T366719	CAT1196	0.0848	0.38	0.93981	171.844	224.757
T321563	KCCAT404	0.08804	0.38	0.93981	19.9742	24.7166
T380530	LINC00086	-0.0867	0.38	0.93981	95.3376	181.684
T133993	KCCAT494.1	-0.081	0.38	0.93981	64.9695	81.0671
T351126	PCAT1	0.087	0.39	0.93981	14.7711	22.3496
T169553	CAT2072	-0.0893	0.39	0.93981	1.82619	4.11439
T377340	PNAT116	-0.0864	0.39	0.93981	17.5638	141.282
T219475	ZFAS1.3	-0.0806	0.39	0.93981	492.338	668.508
T196864	CVAT39	0.0802	0.39	0.93981	23.9592	31.1602
T315053	CAT886	-0.0898	0.39	0.93981	64.4173	259.334
T152908	KCCAT144	-0.0864	0.39	0.93981	8.86663	12.6443
T109603	DICER1-AS1	-0.0853	0.39	0.93981	162.788	210.547
T234183	CAT2250.1	-0.0844	0.39	0.93981	82.907	309.016
T114595	CAT1724.2	-0.0865	0.39	0.93981	6.7884	14.3464
T059561	KCCAT373	0.0811	0.39	0.93981	25.8401	34.558
T265047	CAT549.1	-0.0865	0.39	0.93981	14.3701	18.1927
T340480	CAT1012.1	-0.0863	0.39	0.93981	42.9107	116.609
T078418	AMAT99	0.0851	0.39	0.93981	45.6876	60.0728
T262687	CAT532	0.0829	0.39	0.93981	83.4936	107.971
T052266	MIR210HG.1	-0.08635	0.39	0.93981	83.1385	135.324
T063065	CAT1388.1	0.0802	0.39	0.93981	60.3785	103.816
T025048	CAT136.2	-0.0927	0.39	0.93981	4.45521	12.301
T156740	MAFG-AS1.1	-0.0852	0.39	0.93981	1359.2	1737.72
T097738	PRCAT155	-0.0903	0.39	0.93981	1.72321	3.43273
T025806	KCCAT463	-0.0831	0.39	0.93981	43.2198	52.9559
T129960	CAT1842.2	0.0806	0.39	0.93981	457.112	553.655
T010926	KCCAT455	-0.0861	0.39	0.93981	40.4713	60.9817
T265721	KHCAT199	0.0804	0.39	0.93981	27.1084	46.3216
T376030	CAT2288	0.0825	0.39	0.93981	55.5637	67.0197
T002711	CAT12.1	0.0859	0.39	0.93981	77.512	98.4819
T203015	CAT329	0.0795	0.39	0.93981	235.651	342.586
T274719	CAT607	-0.0871	0.39	0.93981	6.0327	9.13974
T304570	OVAT136	-0.0868	0.39	0.93981	2.4874	4.13792
T175227	MBAT106	-0.0812	0.39	0.93981	116.576	216.451
T363698	CAT1173	0.0848	0.39	0.93981	4.97869	7.49015
T196462	PRCAT138	-0.0909	0.39	0.93981	1.51519	2.31625
T365063	CAT1184.1	0.0853	0.39	0.93981	290.398	383.413
T200696	OVAT80	-0.0803	0.39	0.93981	5.37923	7.115
T238653	EAF1-AS1	0.083	0.39	0.93981	22.6438	30.2638
T157813	CAT1994	0.0788	0.39	0.93981	20.8376	40.1311
T263989	KHCAT209	-0.0884	0.39	0.93981	30.7645	41.4671
T177112	CAT2111	-0.0842	0.39	0.93981	33.9745	43.9483
T177939	NAPA-AS1.1	-0.0841	0.39	0.93981	314.925	390.477
T373822	CAT2279.1	-0.077	0.39	0.93981	24.5813	43.8008
T227255	CAT2216.2	-0.0899	0.39	0.93981	22.5918	38.9137
T201796	CAT322	-0.08526	0.39	0.93981	47.4524	61.8381
T295054	CAT755	0.0823	0.39	0.93981	117.215	150.759
T261137	PRCAT306	-0.08154	0.39	0.93981	54.1654	71.0755
T282191	KCCAT682	-0.0789	0.39	0.93981	84.1774	106.895
T160524	CAT2008	-0.0879	0.39	0.93981	15.7793	27.3268
T354539	ZNF252P-AS1	-0.0865	0.39	0.93981	3.26518	4.80556
T029851	LACAT67	-0.0825	0.39	0.93981	152.476	341.379
T151507	THCAT425	-0.0873	0.39	0.93981	2.16853	4.94814
T292545	BRCAT138	0.0866	0.39	0.93981	3.26081	4.57411
T032976	KHCAT326	-0.0847	0.39	0.93981	5.97244	11.14
T149628	HICLINC345.1	-0.0826	0.39	0.93981	6.55184	9.5956
T089600	BRCAT142	0.0863	0.4	0.93981	2.41936	3.84838
T123737	KCCAT209	-0.0833	0.4	0.93981	112.208	145.15
T200456	CAT316	-0.0861	0.4	0.93981	13.2951	18.5708
T115171	LACAT212	0.0803	0.4	0.93981	126.226	152.197
T275267	THCAT354	0.0793	0.4	0.93981	1.57956	3.15665
T164132	LINC00909.1	-0.083	0.4	0.93981	141.537	188.507
T363540	CAT1172	-0.0879	0.4	0.93981	1.74965	3.65516
T353731	FAM83H-AS1.2	0.086	0.4	0.93981	202.793	298.068
T032818	CAT187.2	-0.083	0.4	0.93981	3.58597	5.46096
T042844	JMJD1C-AS1	-0.0823	0.4	0.93981	18.9321	29.1294
T254690	KHCAT378	0.0768	0.4	0.93981	39.9351	73.9733
T300927	CAT786	-0.0863	0.4	0.93981	13.1598	16.5121
T130003	KPCAT16	0.0787	0.4	0.93981	108.075	143.024
T258476	MFI2-AS1.2	-0.0827	0.4	0.93981	25.6504	43.5023
T213811	AMAT66	0.0819	0.4	0.93981	106.122	145.474
T041024	CAT1255	-0.0787	0.4	0.93981	88.6594	151.446
T261656	CAT520	-0.0812	0.4	0.93981	116.729	184.938
T203508	KCCAT250.1	-0.0874	0.4	0.93981	3.33316	9.60599
T097797	DNAJC3-AS1.1	-0.0829	0.4	0.93981	64.9301	98.8174
T036866	GATA3-AS1.4	-0.0926	0.4	0.93981	38.4657	86.7376
T380542	DDX26B-AS1	0.08283	0.4	0.93981	3.05978	4.65321
T281807	CAT657.1	0.0834	0.4	0.93981	15.2325	21.2555
T219632	UTAT23	-0.07804	0.4	0.93981	13.281	15.4034
T317942	AMAT103	-0.0831	0.4	0.93981	18.204	24.7252
T303925	THCAT509	-0.0851	0.4	0.93981	3.70614	5.12343
T027091	THCAT421	-0.0884	0.4	0.93981	15.4996	21.2836
T379519	CVAT24	-0.0821	0.4	0.93981	7.41605	16.6007
T297970	CAT773.2	0.084	0.4	0.93981	9.32083	13.8198
T130508	BRCAT126	-0.08222	0.4	0.93981	51.1026	76.6348
T374161	UXT-AS1	0.0803	0.4	0.93981	47.7225	57.9587
T239427	KCCAT648	-0.0809	0.4	0.93981	20.9728	28.5304
T113052	CAT1712	-0.0778	0.4	0.93981	40.4454	57.0362
T235551	THCAT486	-0.0815	0.4	0.93981	95.7689	141.541
T177396	CAT2113.1	-0.0858	0.4	0.93981	48.5694	69.2391
T311861	CAT865	-0.0827	0.4	0.93981	153.632	243.374
T267911	HNCAT259	-0.0866	0.4	0.93981	3.17401	8.68193
T077376	CAT1501.4	-0.0836	0.4	0.93981	319.351	639.275
T138943	KHCAT19.1	-0.0835	0.4	0.93981	16.1429	24.707
T029072	CAT158.2	-0.0837	0.4	0.93981	4.73387	40.6053
T131766	OVAT38	0.0805	0.4	0.93981	9.03005	14.5562
T225755	HNCAT41.2	0.0863	0.4	0.93981	5.60693	9.57886
T249506	MEAT120	-0.083	0.4	0.93981	27.7804	40.3158
T182231	CAT2135	-0.0881	0.4	0.93981	53.8827	87.3167
T322083	CAT931	-0.0791	0.4	0.93981	38.2249	47.3245
T225402	LINC00649.3	-0.079	0.4	0.93981	93.6361	197.234
T111991	BRCAT56	-0.0904	0.4	0.93981	4.63093	44.5486
T038300	CAT1238	-0.0817	0.4	0.93981	105.17	136.297
T196995	CAT298	-0.0879	0.4	0.93981	4.76059	8.14411
T043912	MEAT104	-0.0795	0.4	0.93981	97.1065	118.956
T267798	CAT570	0.0828	0.4	0.93981	7.93099	22.5289
[truncated: 2,709 more rows]

## Sheet: CESC
Transcript ID	Name	Cox coefficient	Raw p-value	BH-adjusted p-value	Median Expression	Mean Expression	Cox model: coxph(Surv(times,died) ~ lncrna + grade1 + grade2 + grade3 + grade4 + age)
T234101	LSCAT230	-1.3973	2.8e-06	0.0125804	42.8498	129.84
T047724	MBAT88	-0.9624	2.1e-05	0.0344463	701.796	987.541
T243100	CAT407.1	-1.082	2.3e-05	0.0344463	332.407	434.697
T060210	THCAT226	-1.0395	6.5e-05	0.0646992	41.4888	49.7058
T289741	UTAT1	-0.8968	7.2e-05	0.0646992	236.703	310.446
T239205	MBAT70	-0.8029	0.0001	0.0706043	710	945.967
T077376	CAT1501.4	-1.08284	0.00011	0.0706043	812.044	1058.93
T373737	UTAT48	-0.79486	0.00013	0.0730112	11.5629	21.2087
T033555	CAT191	-0.836	0.00023	0.0866507	14.88	23.9386
T125200	SNHG9	-0.7368	0.00024	0.0866507	204.679	276.001
T045544	CAT1285.1	-0.9294	0.00024	0.0866507	168.319	204.908
T046570	ENTPD1-AS1.4	-0.7586	0.00024	0.0866507	3.49921	5.44779
T170655	CAT2080.2	-0.909	0.00027	0.0866507	5.30515	9.34751
T181983	CAT2134.4	-0.7336	0.00027	0.0866507	519.745	632.817
T313035	CAT877	-0.8145	0.00036	0.0945895	53.2804	76.4843
T151696	HICLINC347	-0.7879	0.00037	0.0945895	13.6639	19.9012
T043711	CAT1274	-0.90745	0.00039	0.0945895	54.9486	76.2311
T156688	UTAT3	-0.88505	0.0004	0.0945895	709.33	927.729
T169754	OVAT50	-0.6893	0.0004	0.0945895	15.0339	20.5825
T272951	CAT596.2	-0.8084	0.00044	0.0950442	48.1064	54.9287
T114876	CAT1729.5	-0.7258	0.00047	0.0950442	168.033	222.086
T164132	LINC00909.1	-0.7387	0.0005	0.0950442	149.446	216.084
T117944	AMAT81	-0.8164	0.00053	0.0950442	36.3177	50.9275
T036557	UTAT40	-0.7475	0.00053	0.0950442	720.772	916.476
T104353	CAT1660	-0.8275	0.00054	0.0950442	19.2991	28.0047
T083975	CAT1558	-0.7869	0.00055	0.0950442	54.0377	66.4083
T054685	SBF2-AS1.1	-0.81963	0.00065	0.107832	2.35958	4.22802
T298225	LACAT200	-0.78014	0.00069	0.107832	4.08275	5.68927
T136619	CAT1876.2	-0.6733	0.0007	0.107832	15.7461	30.1006
T258183	KCCAT630	-0.7808	0.00075	0.107832	28.4308	50.5346
T063450	PNAT124	-0.73514	0.00078	0.107832	35.8269	52.3405
T200383	CAT314	-0.7138	0.00082	0.107832	26.9987	48.455
T061741	AMAT78	-0.769	0.00084	0.107832	17.3868	22.5945
T250694	CAT448	-0.80771	0.00084	0.107832	24.1096	37.6682
T375185	CAT2283.1	-0.657	0.00087	0.107832	180.592	241.853
T348199	CAT1069	-0.64917	0.00093	0.107832	286.35	608.816
T054093	CAT1333	-0.6442	0.00094	0.107832	10.234	24.2415
T129676	CAT1837.1	-0.6607	0.00096	0.107832	419.21	474.293
T117917	USP3-AS1.3	-0.62582	0.00097	0.107832	116.454	138.432
T043904	CAT1276	-0.6345	0.001	0.107832	27.356	36.5941
T126257	KCCAT311	-0.6956	0.001	0.107832	17.5343	24.5816
T119766	UTAT12	-0.6439	0.0011	0.107832	25.9933	40.0807
T122189	CAT1786	-0.57259	0.0011	0.107832	35.9618	45.829
T120095	LACAT236	-0.6858	0.0011	0.107832	21.6792	29.8561
T082004	MEAT118	-0.699	0.0012	0.107832	4.2399	7.27606
T242349	CAT403.2	-0.83493	0.0012	0.107832	14.9084	20.3352
T144726	CAT1919	-0.711	0.0012	0.107832	112.452	179.855
T326349	CAT944	-0.8122	0.0012	0.107832	45.2104	73.1743
T129476	CAT1834.1	-0.764	0.0012	0.107832	27.7224	43.3705
T200374	HICLINC63	-0.6931	0.0012	0.107832	4.71342	9.91383
T054264	CAT1334.2	-0.7167	0.0013	0.108165	11.526	18.5038
T271074	CAT583	-0.7368	0.0013	0.108165	249.518	323.134
T175450	THCAT353	-0.7717	0.0013	0.108165	2.11287	3.01556
T077372	CAT1501.3	-0.8419	0.0013	0.108165	1248.64	1393.12
T252832	HNCAT168	-0.7514	0.0014	0.110354	3.40115	8.35622
T363728	KHCAT191	-0.7136	0.0014	0.110354	4.7685	6.94666
T163270	KCCAT360	-0.7037	0.0014	0.110354	2.77108	4.50202
T216458	CAT2160.2	-0.71075	0.0015	0.112325	78.1147	114.478
T156561	CAT1984	-0.6301	0.0015	0.112325	2749.46	3358.57
T203739	GBAT21	-0.6903	0.0015	0.112325	2.77994	4.68045
T110182	OVAT5	0.6611	0.0016	0.117849	6.1444	11.7078
T135024	CAT1868	-0.6555	0.0017	0.119345	37.5857	48.5951
T238393	KHCAT451	-0.7122	0.0017	0.119345	20.8682	43.4172
T343093	MBAT81	-0.699	0.0017	0.119345	463.446	606.299
T253759	MBAT59	-0.6659	0.002	0.136152	18.5931	28.9275
T129950	CAT1841.4	-0.7239	0.002	0.136152	9869.61	10836.2
T232333	UTAT14	-0.665	0.0021	0.138754	11.6451	14.7882
T253312	CAT464	-0.7159	0.0021	0.138754	281.084	359.296
T321689	CAT926	-0.6486	0.0022	0.139647	31.2685	54.4394
T136581	HICLINC337	-0.70787	0.0022	0.139647	15.359	22.0357
T042841	OVAT58	-0.7211	0.0023	0.139647	13.84	22.9962
T183922	CAT200	-0.6928	0.0023	0.139647	89.1738	156.187
T158875	CAT2001	-0.6775	0.0023	0.139647	130.018	163.86
T021422	UTAT7	-0.608	0.0023	0.139647	171.505	193.146
T242354	CAT405.1	-0.6637	0.0024	0.141884	209.676	275.537
T224779	PRCAT221	-0.6498	0.0024	0.141884	22.6386	51.1167
T153059	CAT1968.1	-0.7318	0.0025	0.144006	34.6664	48.4361
T080255	MBAT89	-0.6312	0.0025	0.144006	40.3224	60.7651
T358163	CAT1141.4	-0.6188	0.0026	0.146022	2036.6	2414.07
T166200	CAT2044	-0.6	0.0026	0.146022	17.0608	37.5269
T122239	PRC1-AS1	-0.6611	0.0027	0.149767	85.0326	122.301
T145468	CAT1924	-0.6335	0.0028	0.151508	35.0594	44.934
T292016	MBAT72	-0.6334	0.0028	0.151508	22.7305	39.8374
T141182	MBAT79	-0.6158	0.0029	0.151508	449.183	579.53
T222509	KCCAT607	-0.6241	0.0029	0.151508	2.14243	3.94158
T321688	KCCAT589	-0.694	0.0029	0.151508	2.60318	5.62567
T285320	CAT685.1	-0.7135	0.003	0.154931	2.94531	17.1419
T137853	KHCAT142	-0.743	0.0031	0.158276	21.7267	31.1318
T023588	CAT127	-0.755	0.0032	0.158576	37.5784	72.5161
T342876	CAT1032	-0.6361	0.0032	0.158576	18.0773	31.9355
T205376	CAT350	-0.5769	0.0033	0.158576	280.983	349.427
T063018	SHANK2-AS2	-0.7041	0.0033	0.158576	4.47259	6.45079
T061019	UTAT10	-0.67159	0.0034	0.158576	927.03	1247.38
T176285	HRAT8	-0.6677	0.0035	0.158576	10.3964	14.3869
T054279	CAT1335	-0.6166	0.0035	0.158576	12.216	16.2461
T293004	KCCAT292	-0.6344	0.0035	0.158576	2.7834	4.61537
T089996	UTAT9	-0.6452	0.0036	0.158576	94.2031	106.775
T037147	CAT1229	-0.7254	0.0036	0.158576	52.5727	66.2775
T175035	KCCAT381	-0.61788	0.0036	0.158576	5.23805	8.15104
T272471	MBAT90	-0.6245	0.0036	0.158576	599.702	803.406
T233874	KCCAT180	-0.583	0.0036	0.158576	8.97023	15.1198
T125424	KHCAT2	-0.721	0.0036	0.158576	78.8538	94.9877
T321739	CAT928	-0.5796	0.0037	0.161399	6.05658	12.5954
T153890	CAT1977	-0.5761	0.0038	0.162247	30.2853	50.2604
T231513	MBAT2	-0.598	0.0038	0.162247	6.26568	8.02089
T031478	KCCAT203	-0.6535	0.0039	0.162247	11.3222	22.7863
T106755	AMAT117	-0.6346	0.0039	0.162247	16.8943	21.272
T195306	OVAT252	-0.5904	0.0039	0.162247	5.56624	7.20608
T175504	CAT2103	-0.5623	0.004	0.163382	5.49226	9.19338
T119136	THCAT451	-0.5635	0.004	0.163382	22.5975	29.4612
T180043	UTAT26	-0.6896	0.0042	0.165532	79.7975	127.454
T098209	CAT1629.2	-0.6633	0.0042	0.165532	420.582	516.373
T378515	MBAT109	-0.6128	0.0042	0.165532	302.64	391.866
T118355	CAT1765	-0.5738	0.0042	0.165532	60.692	76.9742
T168244	THCAT30	-0.65538	0.0043	0.167181	10.7533	23.4607
T286651	KCCAT25	-0.6048	0.0045	0.167181	2.13929	3.95138
T146597	CAT1928	-0.69902	0.0045	0.167181	876.995	1073.23
T348722	CAT1075	-0.5732	0.0045	0.167181	4.74598	15.9552
T071746	CAT1456	-0.5938	0.0045	0.167181	150.036	303.098
T371666	CVAT1	-0.62981	0.0046	0.167181	68.0015	102.747
T189916	CAT243	-0.5172	0.0046	0.167181	57.6508	81.5204
T320665	MBAT62	-0.605	0.0047	0.167181	16.894	22.3612
T272285	ESAT2	0.59121	0.0047	0.167181	69.3674	95.0126
T352469	CAT1109	-0.6194	0.0047	0.167181	301.115	356.053
T169099	CAT2067	-0.6281	0.0047	0.167181	2639.65	4054.88
T298886	KCCAT283	-0.6133	0.0048	0.167181	6.21476	11.8776
T242781	CAT406.1	-0.5513	0.0048	0.167181	101.394	132.085
T044523	KCCAT70	-0.6062	0.0048	0.167181	5.01931	9.83399
T365807	MBAT108	-0.6354	0.0048	0.167181	96.5737	127.157
T321693	CAT927	-0.5755	0.005	0.172808	14.6624	25.264
T017274	KCCAT591	-0.5725	0.0052	0.178348	11.0422	18.2726
T125569	HNCAT232	-0.647	0.0053	0.180401	2.64663	3.74893
T122187	CAT1785	-0.5626	0.0054	0.181702	494.672	645.354
T372050	PHKA2-AS1.2	-0.5796	0.0055	0.181702	6.84368	10.276
T287834	CAT706	-0.6169	0.0055	0.181702	38.4376	51.374
T301843	HCG25.2	-0.5824	0.0055	0.181702	544.675	637.772
T362726	CAT1166	-0.538	0.0056	0.182234	33.9165	69.7726
T250339	LACAT211	-0.5821	0.0057	0.182234	11.9985	16.9733
T087854	KCCAT539	-0.616	0.0057	0.182234	5.46935	8.87407
T161474	LVCAT22	-0.651	0.0057	0.182234	5.6145	10.1913
T061578	CAT1376	-0.57378	0.0058	0.182234	2963.37	3807.25
T143999	CAT1915	-0.6079	0.0058	0.182234	999.476	1220.08
T102606	OVAT48	-0.6738	0.0058	0.182234	14.3053	22.9599
T245053	KHCAT32	-0.55001	0.0059	0.182819	70.7466	126.231
T165129	CAT2038	-0.628	0.0059	0.182819	142.317	199.777
T048595	PDCD4-AS1	-0.67195	0.006	0.183388	53.7103	61.8857
T376237	CAT2289.2	-0.58497	0.006	0.183388	27.9479	90.6573
T174484	ZNF790-AS1	-0.6158	0.0062	0.187208	7.60231	11.2381
T234599	CAT2253.2	-0.5689	0.0063	0.187208	285.38	285.055
T231383	KHCAT67	-0.6394	0.0063	0.187208	64.7561	92.3863
T157813	CAT1994	-0.5536	0.0063	0.187208	12.472	27.5934
T054837	ZBED5-AS1.2	-0.5197	0.0064	0.187208	20.3405	27.3123
T119038	PNAT107	-0.62873	0.0064	0.187208	4.58874	8.3392
T122207	CAT1787	-0.53	0.0065	0.187208	39.24	56.7188
T150404	BRCAT103	0.586	0.0065	0.187208	216.011	264.893
T167158	KCCAT164	-0.5849	0.0065	0.187208	7.05178	12.8771
T379314	AMAT39	-0.5382	0.0067	0.190526	32.5335	39.6406
T350987	KCCAT365	-0.5844	0.0067	0.190526	6.41251	17.7919
T018058	CAT94.1	-0.5791	0.0069	0.193761	4.56241	6.6593
T002865	CAT16	-0.4997	0.0069	0.193761	540.268	693.666
T167530	CAT2058	-0.62	0.0071	0.198139	9.65496	16.0645
T038688	CAT1244	-0.5254	0.0072	0.199689	7.15516	13.7952
T094425	THCAT50.2	-0.5536	0.0073	0.199993	10.9652	18.2517
T328869	KHCAT106	-0.56279	0.0073	0.199993	5.72552	9.07426
T047958	CAT1299	-0.4996	0.0074	0.201504	63.9857	77.7002
T040250	CAT1249	-0.5122	0.0075	0.201781	97.5155	123.994
T115330	LACAT145	-0.5771	0.0075	0.201781	103.24	121.805
T340489	CAT1014	-0.5879	0.0076	0.203255	83.9526	132.5
T078802	CAT1519	-0.6179	0.0077	0.204711	1792.64	2196.24
T167789	MBAT66	-0.6196	0.0078	0.206149	56.6896	69.932
T339197	CAT1007.3	0.4871	0.0079	0.206365	10.1826	22.0228
T258342	TM4SF19-AS1.2	-0.6122	0.0079	0.206365	97.7006	111.853
T326313	OVAT259	-0.5935	0.0081	0.209157	15.1003	18.2455
T249192	CAT438	-0.506	0.0081	0.209157	62.0794	82.1158
T165464	CAT2042	-0.5599	0.0082	0.209333	2118.3	3100.44
T241592	KCCAT364	-0.5109	0.0082	0.209333	23.1997	32.9371
T244703	MEAT114	-0.5607	0.0083	0.210689	115.942	243.987
T247981	KCCAT337	-0.5558	0.0085	0.213355	17.4008	31.0242
T068455	CAT1433.2	-0.5525	0.0085	0.213355	1358.58	1674.67
T153055	CAT1968.2	-0.5144	0.0088	0.21601	112.286	173.975
T167662	CAT2060	-0.4579	0.0089	0.21601	9.36338	15.2509
T005000	ESAT117	-0.5504	0.0089	0.21601	1238.07	1466.07
T374064	UTAT64	-0.6505	0.0089	0.21601	2.97505	3.68225
T353731	FAM83H-AS1.2	0.53444	0.009	0.21601	194.408	252.977
T232879	KCCAT594	-0.5264	0.0091	0.21601	696.19	1337.24
T332663	CAT974	-0.4918	0.0091	0.21601	41.7048	63.833
T341003	UTAT31	-0.5017	0.0093	0.21601	55.2517	70.1606
T156674	CAT1985	-0.4544	0.0094	0.21601	21.5734	37.4251
T237720	AMAT68	-0.5539	0.0094	0.21601	36.4387	44.5823
T046564	ENTPD1-AS1.3	-0.53347	0.0095	0.21601	4.06639	903.228
T193457	LINC00152.4	0.6292	0.0095	0.21601	47.8822	72.5312
T129703	KCCAT172	-0.4753	0.0095	0.21601	61.5776	104.514
T118066	KCCAT581	-0.5127	0.0095	0.21601	12.933	19.921
T167996	CAT2061	-0.6328	0.0096	0.21601	5.3396	69.3059
T002848	CAT15	-0.494	0.0096	0.21601	27.5259	45.2459
T130156	CAT1844	-0.525	0.0097	0.21601	71.1358	90.7043
T089166	CAT1580	-0.5206	0.0097	0.21601	88.5806	302.163
T125427	CAT1808	-0.5863	0.0098	0.21601	4.78542	6.2579
T196824	THCAT571	-0.5303	0.0098	0.21601	5.34575	9.08694
T069499	CAT1438.2	0.5097	0.0098	0.21601	8.39388	27.1767
T015057	MBAT91.1	-0.544	0.0099	0.21601	33.2814	69.8329
T122173	UTAT4	-0.5338	0.01	0.21601	27.1424	49.4285
T186247	DNAJC27-AS1.1	-0.5568	0.01	0.21601	14.2479	18.7631
T333167	MBAT105.3	-0.5762	0.01	0.21601	620.359	842.407
T298876	CAT779	-0.5668	0.01	0.21601	3.98417	6.70352
T201518	CMAT2	-0.479	0.01	0.21601	7.33941	13.7677
T006325	UTAT2	-0.5545	0.01	0.21601	87.8302	120.568
T322556	AMAT24	-0.5219	0.01	0.21601	162.17	184.972
T129451	CAT1833.2	-0.6215	0.011	0.225676	6.51168	24.5717
T367231	CAT1201	-0.5207	0.011	0.225676	220.541	298.167
T148546	MEAT128	-0.69181	0.011	0.225676	68.6049	105.998
T278222	LSCAT52	-0.5428	0.011	0.225676	2.96662	12.1283
T036231	CAT1221.1	-0.5933	0.011	0.225676	17.6097	64.4204
T252454	SIAH2-AS1	-0.4716	0.011	0.225676	55.5298	83.3844
T330641	OVAT3	-0.5787	0.011	0.225676	19.4879	25.9218
T126062	BRCAT259.1	-0.5605	0.011	0.225676	28.6445	41.1146
T295240	LINC00847.2	-0.585	0.011	0.225676	1285.89	1633.76
T319959	CAT912	-0.5153	0.011	0.225676	124.009	154.711
T380707	HRAT6	-0.5754	0.011	0.225676	64.5732	96.2683
T380698	CAT2317	-0.51	0.012	0.23041	4.43862	6.91067
T272834	CAT593.2	-0.4618	0.012	0.23041	11.7816	14.9993
T186359	CAT217	-0.5551	0.012	0.23041	97.5328	128.832
T190557	CAT250.1	-0.5596	0.012	0.23041	45.122	52.8775
T190485	CAT249.1	-0.4569	0.012	0.23041	49.705	83.9968
T064677	LSCAT42	-0.5439	0.012	0.23041	11.0645	19.6625
T044505	KCCAT265	-0.4783	0.012	0.23041	2.70891	6.0328
T130417	MEAT129	-0.5076	0.012	0.23041	86.3141	114.141
T193449	BRCAT59.2	-0.5626	0.012	0.23041	2.45024	5.82107
T086012	USP30-AS1	-0.4743	0.012	0.23041	76.7462	119.258
T109782	CAT1697	-0.4981	0.012	0.23041	18.9781	23.468
T076646	CAT1494	-0.5557	0.012	0.23041	256.489	310.202
T135055	UTAT30	-0.5097	0.012	0.23041	5.18318	8.93324
T054687	SBF2-AS1.6	-0.526	0.012	0.23041	90.6474	155.442
T044393	HICLINC241.2	-0.5711	0.012	0.23041	4.03928	5.40418
T130155	KCCAT469	-0.4753	0.013	0.233636	38.4482	52.9565
T206054	PNAT93	-0.5425	0.013	0.233636	86.4578	164.691
T015570	CAT80.1	-0.5573	0.013	0.233636	519.93	1969.44
T056522	THCAT191	-0.5645	0.013	0.233636	3.61454	5.15205
T182500	HNCAT3.1	-0.5188	0.013	0.233636	624.643	952.984
T073831	CAT1472.1	-0.5154	0.013	0.233636	144.388	313.802
T046744	CAT1293	-0.48035	0.013	0.233636	51.6603	63.8042
T077317	CAT1500	-0.521	0.013	0.233636	266.808	331.773
T089101	LINC00943.3	-0.5345	0.013	0.233636	9.5126	22.4695
T219422	CMAT20	-0.4733	0.013	0.233636	4.61023	7.70888
T225405	LINC00649.1	-0.4964	0.013	0.233636	54.8262	79.7375
T240628	ENTPD3-AS1.1	-0.4956	0.013	0.233636	18.2317	27.1453
T118151	LACAT184	-0.4615	0.013	0.233636	6.82979	9.32497
T263649	CAT535	-0.4724	0.013	0.233636	50.6956	70.4213
T355398	AMAT108	-0.5156	0.013	0.233636	9.15878	14.7342
T041724	KCCAT500	-0.5319	0.013	0.233636	7.51828	17.8898
T229128	LVCAT9	-0.5934	0.014	0.241931	62.1871	72.2428
T073281	ESAT3	-0.5747	0.014	0.241931	19.955	84.807
T063706	MBAT13	0.477	0.014	0.241931	4.75508	6.45044
T363122	LINC00092	-0.5125	0.014	0.241931	32.1157	52.6527
T167661	KCCAT289	-0.4846	0.014	0.241931	3.70153	7.62467
T258478	MFI2-AS1.1	-0.5249	0.014	0.241931	173.023	225.484
T169292	UTAT37	-0.4578	0.014	0.241931	189.956	225.201
T076228	LINC00941.2	-0.57208	0.014	0.241931	12.4989	35.4299
T216209	MBAT77	-0.5076	0.014	0.241931	11.2678	15.7014
T120682	KCCAT367	-0.527	0.014	0.241931	8.06107	14.39
T330617	LINC01004.1	-0.5124	0.015	0.247776	12.0777	17.5071
T223912	CAT2197	-0.4738	0.015	0.247776	7.36219	15.2791
T289144	BRCAT124	-0.4238	0.015	0.247776	5.16342	6.591
T272832	CAT593.3	-0.4843	0.015	0.247776	8.71163	11.3611
T045279	CAT1284.3	-0.537	0.015	0.247776	306.322	587.461
T241165	CAT401.1	-0.5331	0.015	0.247776	382.31	474.446
T258393	LINC01063	-0.57593	0.015	0.247776	11.9454	17.5625
T363543	THCAT577	-0.5777	0.015	0.247776	7.9532	27.9512
T374161	UXT-AS1	-0.46684	0.015	0.247776	105.338	135.232
T099201	SMAT8	0.4771	0.015	0.247776	10.6535	16.7737
T086204	HNCAT253	-0.5981	0.015	0.247776	19.3482	28.9275
T245217	CAT424.1	-0.5527	0.015	0.247776	25.6792	86.865
T198493	KPCAT9	-0.5101	0.016	0.253127	4.05364	4.91045
T231037	LACAT268	-0.55562	0.016	0.253127	200.576	250.623
T228294	MCM3AP-AS1.1	-0.5255	0.016	0.253127	21.7591	28.0378
T068732	CAT1434	-0.554	0.016	0.253127	281.389	330.485
T190484	CAT249.2	-0.5413	0.016	0.253127	3.58054	7.51499
T169313	BRCAT393	-0.49888	0.016	0.253127	1487.04	1918.39
T193450	BRCAT59.1	-0.54643	0.016	0.253127	7.43545	13.6794
T284702	CAT679.2	-0.4599	0.016	0.253127	74.4875	99.9048
T343422	BRCAT104	-0.4613	0.016	0.253127	24.681	32.0541
T301840	HCG25.1	-0.5394	0.016	0.253127	108.299	128.229
T037681	LSCAT274	0.502	0.016	0.253127	4.02107	6.72602
T372051	PHKA2-AS1.1	-0.5144	0.016	0.253127	11.6385	17.6227
T190151	CAT247	-0.4586	0.017	0.258919	514.178	619.495
T027623	CAT147.1	-0.49	0.017	0.258919	251.031	325.386
T323004	SNHG15.1	-0.51259	0.017	0.258919	1101.15	1494.9
T045611	CAT1286	-0.539	0.017	0.258919	3.6703	6.4681
T044117	KHCAT369	-0.5309	0.017	0.258919	89.3741	113.257
T333187	PNAT121	-0.4989	0.017	0.258919	120.743	150.216
T309622	KHCAT404	-0.5337	0.017	0.258919	20.5311	34.3118
T293467	KCCAT4	0.463	0.017	0.258919	13.3814	53.4723
T342857	CAT1031	-0.4513	0.017	0.258919	557.349	792.614
T146014	KCCAT499	-0.5286	0.017	0.258919	4.5094	11.4036
T162887	CAT2025.2	-0.5226	0.017	0.258919	2.29759	5.7115
T364173	CAT1177.1	-0.539	0.018	0.262578	23.0917	31.2608
T062567	BRCAT205	-0.5464	0.018	0.262578	102.151	147.579
T354672	CAT1124	-0.497	0.018	0.262578	3.33698	7.03927
T265048	CAT549.2	-0.5305	0.018	0.262578	7.59723	12.1892
T254690	KHCAT378	-0.5326	0.018	0.262578	92.1143	177.45
T043739	CAT1275	-0.4578	0.018	0.262578	7.81037	11.2495
T109935	CAT1699	-0.501	0.018	0.262578	36.0509	66.975
T073870	KCCAT388	-0.4615	0.018	0.262578	49.6577	263.878
T151854	CAT1962	-0.4888	0.018	0.262578	60.1109	88.7862
T088506	UTAT5	-0.5195	0.018	0.262578	37.6493	44.7311
T332495	CAT971	-0.4824	0.018	0.262578	2.74232	9.2027
T140691	MIR497HG.1	-0.4648	0.018	0.262578	23.0707	29.5715
T044394	HICLINC242.1	-0.5672	0.018	0.262578	1.59999	2.49778
T118007	CAT1764.2	-0.4948	0.019	0.271869	57.3033	78.3701
T038133	NEBL-AS1.3	-0.525	0.019	0.271869	14.125	23.7645
T376712	CAT2291	-0.4342	0.019	0.271869	55.1733	118.894
T178865	KCCAT391	-0.4611	0.019	0.271869	132.526	160.82
T188030	CAT233	-0.5015	0.019	0.271869	42.1186	58.8893
T149628	HICLINC345.1	-0.5061	0.019	0.271869	10.7138	15.644
T074098	CAT1473.3	-0.4228	0.02	0.275644	1416.27	1881.83
T321584	GBAT15	-0.5135	0.02	0.275644	39.0619	48.8927
T062934	CAT1385.3	-0.4791	0.02	0.275644	83.3296	154.539
T279992	ESAT22.3	-0.4774	0.02	0.275644	1.92777	2.68643
T018107	KCCAT153	-0.4689	0.02	0.275644	15.6088	34.9
T254330	CAT470	-0.4381	0.02	0.275644	76.4285	142.472
T093343	KHCAT211	-0.5154	0.02	0.275644	5.30856	8.77297
T232202	TUG1.4	-0.4756	0.02	0.275644	5956.72	7149.66
T379236	CAT2308.1	-0.4723	0.02	0.275644	4.48924	5.89943
T177396	CAT2113.1	0.4691	0.02	0.275644	37.3171	64.2984
T017591	KCCAT16.1	-0.4982	0.02	0.275644	97.0243	117.287
T151773	HICLINC348	-0.4539	0.02	0.275644	24.6957	34.3468
T373973	ZNF674-AS1	-0.4177	0.021	0.275886	200.553	243.438
T177897	CAT2118.1	-0.4939	0.021	0.275886	19.8917	48.907
T346727	CAT1058.1	-0.4339	0.021	0.275886	84.6385	122.087
T078556	CAT1513	-0.428	0.021	0.275886	40.4457	48.2691
T250319	H1FX-AS1.1	-0.5136	0.021	0.275886	27.173	88.3935
T235524	CAT2259.2	-0.5903	0.021	0.275886	133.01	154.29
T064507	KCCAT556	-0.4656	0.021	0.275886	23.8226	33.2051
T033175	MPAT1	-0.4495	0.021	0.275886	584.515	682.124
T038056	MBAT92	-0.4613	0.021	0.275886	235.669	466.477
T201517	CMAT28	-0.5126	0.021	0.275886	1.9954	4.00129
T114897	KHCAT105	-0.452	0.021	0.275886	25.2723	44.0762
T171377	CAT2084.2	-0.4782	0.021	0.275886	16.0302	31.9107
T220769	KCCAT106	0.41328	0.021	0.275886	133.47	269.564
T313012	CAT876	0.49683	0.021	0.275886	11.9984	29.8583
T162081	CAT2017	0.5138	0.021	0.275886	8.11755	14.6689
T231126	KCCAT319.1	-0.4526	0.021	0.275886	22.0997	27.354
T064965	RAB30-AS1	-0.4414	0.022	0.282417	176.453	205.514
T350780	RNF139-AS1.1	-0.4855	0.022	0.282417	10.778	23.3109
T127898	CAT1823	-0.4908	0.022	0.282417	5.96054	11.0771
T254538	LSCAT64	-0.5748	0.022	0.282417	8.40447	13.2718
T204768	HNCAT25.2	-0.5101	0.022	0.282417	8.6367	32.7805
T315258	KCCAT240.3	-0.5005	0.022	0.282417	18.2757	28.7404
T010555	FOXD2-AS1.2	-0.4506	0.022	0.282417	330.655	427.676
T015476	CAT79	0.4423	0.022	0.282417	7.08768	9.83825
T106671	CAT1683.1	-0.5004	0.023	0.289465	420.489	600.49
T362505	THCAT461	-0.50336	0.023	0.289465	80.4102	101.703
T139517	CAT1892.1	-0.4974	0.023	0.289465	784.122	971.368
T138315	AMAT2	0.4534	0.023	0.289465	75.0586	102.009
T017160	LAMTOR5-AS1.1	-0.511945	0.023	0.289465	38.8044	55.5872
T127415	LACAT239	-0.466	0.023	0.289465	11.3409	18.5413
T126032	KCCAT35.1	-0.4372	0.023	0.289465	184.197	229.898
T291253	CAT732	-0.505	0.024	0.294623	9.26117	24.1459
T038476	CAT1242.3	-0.5063	0.024	0.294623	29.9916	39.1582
T256559	ADIPOQ-AS1	-0.4519	0.024	0.294623	2.56018	3.71077
T317004	KCCAT453	-0.4994	0.024	0.294623	8.20601	14.2673
T038735	AMAT14	-0.4715	0.024	0.294623	62.4238	75.566
T010552	CAT47	-0.4621	0.024	0.294623	45.7249	64.008
T183738	CAT199	-0.4393	0.024	0.294623	12.9544	15.2509
T216115	CAT2155	-0.5149	0.024	0.294623	14.1881	21.5406
T014949	CAT76.2	-0.4442	0.024	0.294623	19.9553	52.9394
T114645	CAT1726	-0.43255	0.025	0.298737	171.531	225.274
T047878	CAT1298	0.459	0.025	0.298737	65.4492	85.4253
T238837	MBAT103	-0.4484	0.025	0.298737	576.836	752.24
T023556	KCCAT489	-0.4575	0.025	0.298737	6.83201	15.2137
T258685	OVAT91	-0.4576	0.025	0.298737	21.0683	28.0762
T086331	OVAT1	-0.44471	0.025	0.298737	8.19067	9.51422
T129768	CAT1840.1	0.47566	0.025	0.298737	6.02959	16.6913
T147942	CAT1935	0.4632	0.025	0.298737	2.0797	10.3813
T184361	CAT207	-0.4607	0.025	0.298737	301.265	390.197
T108078	THCAT338	-0.48407	0.025	0.298737	1.66976	2.64221
T195198	AMAT4	-0.4509	0.026	0.303423	45.4845	52.5702
T330320	KHCAT29	-0.4173	0.026	0.303423	21.1305	30.7698
T216234	CAT2158	0.465	0.026	0.303423	32.823	58.2005
T366813	BRCAT428	-0.50513	0.026	0.303423	37.3401	53.5285
T258422	AMAT57	-0.4561	0.026	0.303423	5.82196	8.20862
T076525	OVAT17.1	-0.50967	0.026	0.303423	3.136	4.33612
T365373	CAT1187	-0.403	0.026	0.303423	48.6201	77.2976
T381481	CAT2318	-0.4348	0.026	0.303423	58.7971	79.1162
T044512	KCCAT348	-0.4863	0.026	0.303423	2.79315	6.23569
T031976	MBAT57	-0.447	0.027	0.306341	143.539	218.72
T074221	CAT1474	-0.3911	0.027	0.306341	34.7857	50.4736
T353655	HNCAT56	-0.4663	0.027	0.306341	146.557	176.56
T158859	PRCAT279	-0.5224	0.027	0.306341	3.14872	5.9784
T353728	FAM83H-AS1.5	0.47796	0.027	0.306341	81.5723	105.77
T229381	KHCAT87	-0.4798	0.027	0.306341	5.70222	7.30564
T247017	LACAT229	-0.4267	0.027	0.306341	36.5431	48.2651
T264691	USP46-AS1	-0.4675	0.027	0.306341	368.8	429.506
T291896	THCAT212	-0.464	0.027	0.306341	19.4903	25.2061
T148235	LSCAT92	-0.4617	0.027	0.306341	24.262	132.155
T025155	HICLINC24.2	-0.5039	0.027	0.306341	0.829173	1.25543
T334719	CAT987	-0.4344	0.028	0.307589	77.0956	180.426
T023099	KCCAT308	-0.4434	0.028	0.307589	8.74234	22.2569
T249156	KCCAT593	-0.4277	0.028	0.307589	7.40957	9.58924
T382726	PRCAT188.3	-0.4713	0.028	0.307589	7.13273	16.6582
T102768	CAT1650	0.50599	0.028	0.307589	42.4807	54.1713
T375415	MBAT78	-0.4195	0.028	0.307589	112.165	162.798
T042721	CAT1267	-0.41722	0.028	0.307589	101.105	124.982
T037986	LVCAT67.2	-0.4129	0.028	0.307589	14.9354	18.0772
T332197	BRCAT235	-0.4473	0.028	0.307589	156.097	271.995
T191948	DGUOK-AS1.2	-0.5105	0.028	0.307589	83.6073	104.516
T123372	AMAT61	-0.4011	0.028	0.307589	127.335	163.008
T114874	CAT1729.3	-0.4369	0.028	0.307589	34.4654	43.2365
T366122	THCAT265	-0.4409	0.028	0.307589	5.75997	9.70747
T162496	CAT2019	0.504	0.029	0.312463	4.30639	15.4978
T254340	OVAT166.1	-0.4215	0.029	0.312463	33.384	70.3534
T375697	CMAT1	-0.4598	0.029	0.312463	19.2112	30.5963
T190670	CAT252.1	-0.5225	0.029	0.312463	19.7203	24.809
T077603	LACAT25.2	-0.4989	0.029	0.312463	10.3566	20.222
T125816	HNCAT156	-0.5078	0.029	0.312463	20.4244	26.0352
T382725	PRCAT188.1	-0.50031	0.029	0.312463	6.25875	11.2886
T287428	CAT700	-0.4933	0.029	0.312463	56.5556	93.9587
T123737	KCCAT209	-0.4335	0.03	0.313465	168.928	206.751
T067941	UTAT78	-0.4433	0.03	0.313465	11.5336	17.4916
T370751	PRKX-AS1	-0.4435	0.03	0.313465	9.85085	13.5433
T352392	KCCAT102.1	-0.4172	0.03	0.313465	2.74676	5.84559
T107162	CAT1688.1	-0.5405	0.03	0.313465	240.706	327.412
T243432	KHCAT23	-0.4656	0.03	0.313465	90.8927	121.95
T200157	MPAT6	-0.458	0.03	0.313465	7.94369	11.7798
T208675	CAT371	-0.4338	0.03	0.313465	44.1643	60.8113
T208670	CAT370	-0.40222	0.03	0.313465	28.4702	53.3141
T191617	CAT262	-0.4031	0.03	0.313465	17.8669	22.9023
T025532	CAT138	-0.4019	0.03	0.313465	73.9757	86.9155
T015990	CAT82	-0.4643	0.03	0.313465	441.777	549.015
T369280	PRCAT256	-0.5028	0.03	0.313465	2.30025	5.58475
T334254	CAT984.2	-0.4826	0.031	0.31512	12.895	21.6875
T015056	MBAT91.2	-0.4039	0.031	0.31512	21.3203	60.9891
T378917	CAT2305	-0.471	0.031	0.31512	3.39258	25.8832
T302347	AMAT141	-0.4432	0.031	0.31512	3.31368	3.98634
T331729	ST7-AS1	-0.42025	0.031	0.31512	66.1844	80.7118
T187946	THCAT573	-0.4193	0.031	0.31512	16.3413	30.5237
T113553	CAT1714	-0.4907	0.031	0.31512	67.4844	94.4825
T145493	CAT1925	0.4263	0.031	0.31512	40.8123	47.2435
T170129	CAT2075	-0.37	0.031	0.31512	31.2869	40.5766
T055745	CAT1341	-0.4345	0.031	0.31512	137.864	162.809
T037127	CAT1228	-0.4511	0.031	0.31512	25.6213	46.481
T279183	KCCAT141	-0.3713	0.031	0.31512	562.918	749.512
T367184	AMAT86	-0.4344	0.032	0.318794	30.0893	36.5047
T061553	CAT1375.1	-0.47224	0.032	0.318794	83.0862	122.899
T002637	OVAT85	-0.4437	0.032	0.318794	6.38475	9.10219
T169312	KCCAT619	-0.4857	0.032	0.318794	25.0619	38.8771
T073832	CAT1472.2	-0.4768	0.032	0.318794	179.309	387.831
T356020	CAT1135	-0.4911	0.032	0.318794	54.6788	80.96
T141772	LVCAT40	-0.4588	0.032	0.318794	220.457	273.219
T247979	KCCAT192	-0.451	0.032	0.318794	13.8654	30.7453
T191970	PNAT112	-0.4233	0.032	0.318794	76.1627	97.8071
T014702	KCCAT314	-0.3933	0.033	0.322324	22.4206	40.4005
T033216	CAT188.1	-0.4616	0.033	0.322324	11.442	16.0704
T045844	KCCAT174	-0.4539	0.033	0.322324	13.0168	17.2823
T258476	MFI2-AS1.2	-0.45042	0.033	0.322324	128.96	154.221
T011935	THCAT529.2	0.4285	0.033	0.322324	2.62761	4.09407
T076032	CAT1492.2	-0.5213	0.033	0.322324	7.34655	16.3477
T335756	KHCAT43	-0.4697	0.033	0.322324	26.3115	38.1401
T015715	CAT81.4	-0.4293	0.033	0.322324	19.0506	24.4678
T348497	KCCAT219	-0.4535	0.033	0.322324	102.165	132.256
T133951	CAT1865	-0.4584	0.034	0.327113	77.4381	102.439
T002331	THCAT594	-0.4011	0.034	0.327113	5.97287	7.437
T346024	AMAT104	-0.4357	0.034	0.327113	11.5564	16.6332
T233872	KCCAT92	-0.473	0.034	0.327113	42.9589	60.9957
T349869	PNAT110	-0.4939	0.034	0.327113	73.5253	129.12
T045632	NUTM2A-AS1.2	-0.4196	0.034	0.327113	65.4079	100.064
T135745	CAT1870	-0.46311	0.034	0.327113	25.5584	37.7169
T077101	THCAT16	-0.4456	0.035	0.329675	5.29694	9.12956
T184375	CAT208	-0.4912	0.035	0.329675	10.8876	16.1014
T117478	CAT1757	-0.4182	0.035	0.329675	8.89146	10.7617
T167146	KCCAT517	-0.4553	0.035	0.329675	1.49253	3.85981
T377599	KCCAT688	-0.434	0.035	0.329675	8.06785	13.8435
T009559	KDM4A-AS1.1	-0.4209	0.035	0.329675	9.7372	14.6876
T180972	KCCAT376	-0.4501	0.035	0.329675	3.22778	5.3118
T232938	CAT2242	-0.4688	0.035	0.329675	2.87872	5.75664
T327879	CAT951	-0.4344	0.035	0.329675	2.4883	3.98668
T168316	MEAT145	-0.463	0.035	0.329675	7.72769	11.5888
T159555	CMAT26	-0.4011	0.036	0.33419	10.268	14.9163
T168429	UTAT16	-0.4643	0.036	0.33419	22.3062	27.4548
T191903	CAT263	-0.4317	0.036	0.33419	83.1577	99.9373
T174448	KCCAT293	-0.4725	0.036	0.33419	20.5772	30.3907
T239901	AMAT136	-0.45642	0.036	0.33419	4.60545	6.23008
T352044	CAT1107	-0.4198	0.036	0.33419	52.2912	73.325
T028253	KCCAT78.1	0.43616	0.036	0.33419	5.5869	9.50765
T082674	CAT1549.1	0.3909	0.037	0.338576	215.411	410.278
T017168	LAMTOR5-AS1.2	-0.443	0.037	0.338576	13.7502	23.5818
T244169	KHCAT183	-0.4249	0.037	0.338576	11.3609	20.3714
T053647	KHCAT47	-0.4334	0.037	0.338576	11.5078	14.3062
T320330	CAT913	-0.3929	0.037	0.338576	51.8848	79.369
T065467	THCAT130	-0.4816	0.037	0.338576	7.16834	14.3945
T120395	LACAT172	-0.4031	0.037	0.338576	4.14971	6.18838
T363540	CAT1172	-0.4394	0.038	0.342152	40.3709	80.4298
T320928	KCCAT431	-0.4573	0.038	0.342152	117.08	162.46
T170039	CAT2073	-0.4329	0.038	0.342152	31.504	39.3605
T089589	CAT1581	0.384	0.038	0.342152	11.4652	18.0115
T154290	LVCAT13	-0.5052	0.038	0.342152	104.284	142.402
T015157	THCAT610	-0.4162	0.038	0.342152	121.241	157.862
T265081	BRCAT121	-0.442	0.038	0.342152	18.2828	55.0651
T102563	HICLINC302	-0.409	0.038	0.342152	3.41795	4.28905
T166140	KHCAT247	-0.4535	0.039	0.347673	0.145817	0.590214
T154947	PNAT127	-0.4684	0.039	0.347673	289.982	354.127
T279547	CAT647.3	-0.4408	0.039	0.347673	18.4442	29.8471
T017677	AP4B1-AS1	-0.4239	0.039	0.347673	27.6024	48.3362
T029604	MIR205HG.9	-0.4625	0.039	0.347673	14.3268	27.053
T048011	PRCAT216	-0.4117	0.04	0.348971	2.76697	4.09734
T363573	THCAT537	-0.4056	0.04	0.348971	18.6894	27.1559
T009217	CAT40.2	-0.4118	0.04	0.348971	26.3087	35.5572
T073683	KCCAT127	-0.4365	0.04	0.348971	59.7726	120.366
T159101	UTAT6	-0.3905	0.04	0.348971	48.6461	62.0671
T145874	KHCAT448	-0.50276	0.04	0.348971	582.346	716.774
T017612	CAT90	-0.432	0.04	0.348971	8.20848	10.6875
T189536	CAT241	-0.446	0.04	0.348971	3.57502	5.13777
T144961	CAT1922.2	-0.4669	0.04	0.348971	11.8854	15.3676
T225746	KCCAT20.1	-0.4013	0.04	0.348971	5.57295	16.3722
T233410	KCCAT420	-0.4344	0.04	0.348971	55.6326	67.4631
T046846	KHCAT417	-0.4497	0.041	0.351552	10.0007	19.6714
T247980	KCCAT301	-0.4185	0.041	0.351552	20.9303	42.9034
T196761	CAT291.2	-0.4534	0.041	0.351552	668.496	829.348
T039519	LACAT224	-0.4105	0.041	0.351552	3.67244	4.36026
T150669	THCAT287	-0.4342	0.041	0.351552	2.90706	4.46265
T363034	CAT1168.2	-0.4014	0.041	0.351552	35.6347	47.3248
T128814	CAT1828	-0.4102	0.041	0.351552	359.272	451.372
T041872	AMAT87	-0.4354	0.041	0.351552	73.7101	91.7984
T328842	KCCAT440	-0.409	0.041	0.351552	106.94	128.689
T254537	HNCAT139	-0.4535	0.042	0.358076	4.23379	6.97084
T249140	AMAT151	-0.386	0.042	0.358076	5.40947	10.5173
T150560	LACAT270	-0.4358	0.042	0.358076	362.528	426.783
T129955	CAT1841.1	0.413	0.043	0.361796	361.404	397.785
T056291	LSCAT95	-0.4585	0.043	0.361796	2.57104	11.7131
T188538	KHCAT367	0.3666	0.043	0.361796	30.3259	50.4285
T045276	CAT1284.1	-0.4149	0.043	0.361796	146.217	399.286
T033403	CAT190.2	0.4286	0.043	0.361796	2.00964	3.56559
T193003	CAT267	-0.3585	0.043	0.361796	8.91399	11.8567
T207351	CAT368.1	0.4415	0.043	0.361796	7.33358	33.6349
T334257	AMAT69	-0.4179	0.044	0.36542	27.092	40.1086
T219477	ZFAS1.1	-0.4293	0.044	0.36542	1247.27	1657.64
T275267	THCAT354	-0.4328	0.044	0.36542	10.7487	22.2236
T234355	MPAT7	-0.4015	0.044	0.36542	68.7017	93.1787
T231747	LSCAT177	-0.465	0.044	0.36542	24.9327	60.4533
T165930	CMAT4	-0.40333	0.044	0.36542	6.82428	10.0913
T143531	THCAT330	-0.4808	0.044	0.36542	1.71463	4.49914
T238488	HRAT84	-0.4344	0.045	0.368951	3.45921	8.10981
T307745	CAT837	-0.417	0.045	0.368951	519.463	695.304
T174674	THCAT98	-0.4126	0.045	0.368951	3.71405	7.72236
T313282	UTAT25	-0.3733	0.045	0.368951	2.97765	4.00555
T288161	CAT707.2	-0.4071	0.045	0.368951	2.10601	4.74462
T131898	HNCAT90	0.4406	0.045	0.368951	3.25462	10.5849
T129952	CAT1841.3	0.447	0.045	0.368951	790.906	914.04
T335649	CAT993	-0.405974	0.046	0.371127	20.0186	30.718
T275431	CAT617	-0.3796	0.046	0.371127	72.4293	95.0822
T150714	KCCAT558	-0.3964	0.046	0.371127	3.8455	8.13559
T240634	ENTPD3-AS1.2	-0.4194	0.046	0.371127	65.3784	74.6078
T240632	ENTPD3-AS1.3	-0.4194	0.046	0.371127	65.3784	74.6078
T036220	CAT1220	-0.4849	0.046	0.371127	7.58015	37.0295
T188120	SLC8A1-AS1.2	-0.3708	0.047	0.371127	13.7886	25.0511
T041730	CAT1259.1	-0.3866	0.047	0.371127	68.7487	146.275
T237145	CAT381	-0.3932	0.047	0.371127	20.5875	27.0899
T032371	KCCAT536	0.466	0.047	0.371127	8.97816	24.9173
T288849	KCCAT519	-0.4	0.047	0.371127	13.3253	24.1965
T224780	CAT2201.2	-0.4169	0.047	0.371127	5.40894	17.1238
T130021	CAT1843	-0.376	0.047	0.371127	354.061	438.476
T162873	KCCAT613	-0.4218	0.047	0.371127	90.2308	105.804
T257603	CAT497	0.4724	0.047	0.371127	70.6433	113.131
T014432	BRCAT392	-0.4148	0.047	0.371127	21.2141	29.4059
T132671	CAT1854.3	-0.4264	0.047	0.371127	53.3762	104.189
T363545	LSCAT245	-0.442	0.047	0.371127	9.75901	25.0479
T226898	KCCAT575	-0.3964	0.047	0.371127	17.4528	31.4134
T133492	CRAT4	0.39212	0.047	0.371127	16.1592	22.6152
T250321	H1FX-AS1.2	-0.46724	0.047	0.371127	5.62886	21.2434
T089600	BRCAT142	-0.4727	0.048	0.373121	3.0275	4.29327
T286655	KCCAT91	-0.4233	0.048	0.373121	2.52123	6.56285
T006618	SNHG12.1	-0.3864	0.048	0.373121	57.0925	108.39
T110424	CAT1703	-0.3579	0.048	0.373121	5.56172	9.10516
T347092	THCAT376	-0.3702	0.048	0.373121	4.75496	6.97207
T252785	KCCAT39	-0.4336	0.048	0.373121	29.4122	49.5043
T165255	KHCAT167	-0.4562	0.048	0.373121	2.60835	4.09007
T196812	CAT296.2	-0.3951	0.048	0.373121	49.2786	84.6583
T043912	MEAT104	-0.35625	0.048	0.373121	97.355	119.437
T314152	AMAT113	-0.3911	0.05	0.385334	11.1712	13.8278
T275025	KHCAT360	-0.4046	0.05	0.385334	15.1205	22.7879
T235551	THCAT486	-0.4417	0.05	0.385334	217.322	275.87
T285614	CVAT20	-0.4181	0.05	0.385334	5.9369	8.93488
T049521	UTAT56	-0.37	0.05	0.385334	14.7806	21.4473
T064299	CAT1401	0.4093	0.051	0.387066	7.60714	15.2487
T279551	CAT647.2	-0.427	0.051	0.387066	12.3426	27.7812
T161783	CAT2015	-0.3836	0.051	0.387066	20.0051	24.8586
T173087	MEAT99	-0.4029	0.051	0.387066	27.9938	48.255
T058448	KHCAT114	-0.3909	0.051	0.387066	9.20407	16.035
T249283	KCCAT5	-0.4798	0.051	0.387066	2.36963	6.18006
T107138	CAT1687	-0.46	0.051	0.387066	218.225	278.5
T144646	CVAT13	0.39062	0.051	0.387066	181.353	216.341
T216117	CAT2156	-0.44	0.051	0.387066	31.4278	38.3961
T002642	PNAT100	-0.4547	0.052	0.392007	8.60767	12.5723
T363042	CAT1168.1	-0.3938	0.052	0.392007	29.7504	36.0725
T243671	CAT409.1	-0.38168	0.052	0.392007	42.7866	83.94
T323519	KCCAT24.4	0.3552	0.052	0.392007	3.21391	6.65027
T203415	HOXD-AS1	0.4289	0.053	0.394253	174.257	313.856
T012546	CAT63.1	-0.3734	0.053	0.394253	48.5092	71.861
T154385	CAT1981	-0.4166	0.053	0.394253	17.2916	29.3426
T023851	LACAT65	-0.4114	0.053	0.394253	31.1674	80.2181
T054658	THCAT361.1	-0.4488	0.053	0.394253	2.31892	3.00157
T353383	CAT1115.2	-0.4125	0.053	0.394253	36.8111	42.46
T174016	MBAT94	-0.361	0.053	0.394253	100.896	128.439
T128185	CVAT3	-0.4344	0.053	0.394253	66.3972	98.2604
T348924	THCAT613	-0.414	0.054	0.399707	10.3287	19.2193
T196772	MIR4435-1HG.8	0.3928	0.054	0.399707	36.0127	54.7086
T272045	HRAT7	-0.4078	0.054	0.399707	23.5201	39.1432
T000790	CAT4.1	-0.40336	0.055	0.403124	70.8321	123.051
T006036	UTAT19	-0.4134	0.055	0.403124	787.404	1061.14
T097738	PRCAT155	-0.4373	0.055	0.403124	4.55713	8.55611
T072265	LVCAT45	-0.3568	0.055	0.403124	7.76458	10.4316
T079226	KCCAT297	-0.4134	0.055	0.403124	37.8445	45.4833
T320576	LSCAT58	0.3596	0.055	0.403124	23.4512	43.2304
T115663	KHCAT102	-0.3753	0.056	0.408455	10.6935	18.5613
T048043	KHCAT33	-0.4416	0.056	0.408455	58.348	151.86
T231759	MBAT63	-0.3743	0.056	0.408455	5.74721	9.78583
T281940	HNCAT11	-0.4275	0.057	0.412401	13.5141	30.6537
T002765	LACAT87	-0.4378	0.057	0.412401	6.56205	14.2896
T118005	CAT1764.1	-0.4172	0.057	0.412401	85.699	131.023
T017040	MBAT23	-0.411	0.057	0.412401	334.603	420.694
T290017	HICLINC140.1	-0.3718	0.057	0.412401	346.949	458.682
T230701	KCCAT370	-0.42	0.058	0.414299	28.6653	36.6208
T098795	CAT1631	-0.3491	0.058	0.414299	47.2552	96.4239
T375174	MBAT6	-0.3737	0.058	0.414299	28.5196	44.1739
T265721	KHCAT199	-0.3843	0.058	0.414299	48.4206	177.216
T148753	PRCAT316	-0.3823	0.058	0.414299	3.1442	6.09232
T304570	OVAT136	-0.3957	0.058	0.414299	3.4013	5.10719
T252691	LACAT175	-0.338	0.058	0.414299	17.6097	29.5003
T032159	HRAT15	-0.3892	0.058	0.414299	80.5194	102.913
T082905	LSCAT260	-0.4375	0.059	0.415378	4.80801	11.0561
T353732	FAM83H-AS1.3	0.42992	0.059	0.415378	91.3127	128.419
T143733	STCAT19	-0.4222	0.059	0.415378	6.6114	43.9217
T244137	THCAT531	0.3611	0.059	0.415378	15.5478	41.9136
T379477	KCCAT543	-0.37329	0.059	0.415378	13.6089	20.6164
T348983	CAT1079.3	-0.438	0.059	0.415378	7.39486	75.6974
T180676	CAT2131	-0.3997	0.059	0.415378	301.02	355.551
T302771	KCCAT300	-0.3678	0.06	0.415378	15.3386	22.0544
T366910	CAT1199.1	-0.4094	0.06	0.415378	23.8935	37.4727
T319903	KCCAT428	-0.4026	0.06	0.415378	23.1373	45.3124
T052166	KHCAT208	-0.4111	0.06	0.415378	6.42164	8.58752
T028931	CAT156	-0.3809	0.06	0.415378	44.9729	68.9919
T012270	CAT60.2	-0.3399	0.06	0.415378	65.9737	79.8661
T190661	CAT252.2	-0.3832	0.06	0.415378	32.2853	53.875
T175101	CAT2102.1	-0.3973	0.06	0.415378	29.8966	49.4792
T307028	CAT827.3	-0.40009	0.06	0.415378	11.576	25.0004
T280605	KCCAT568	-0.3705	0.06	0.415378	12.5258	17.3075
T234605	CAT2254.2	-0.4157	0.06	0.415378	56.2327	95.4531
T293862	CAT749.2	-0.4012	0.06	0.415378	81.2365	208.637
T165966	BRCAT332	-0.4231	0.06	0.415378	2.48015	4.90102
T061397	CAT1374.1	-0.3564	0.061	0.418432	7.29899	10.3045
T064152	CVAT35	0.3785	0.061	0.418432	8.02071	10.6065
T256889	KCCAT615	-0.4152	0.061	0.418432	11.4909	22.8097
T160574	LVCAT69	-0.3502	0.061	0.418432	9.68277	11.8013
T038367	CAT1239	0.4077	0.061	0.418432	3.40295	5.52669
T144703	CAT1918	-0.3984	0.061	0.418432	156.504	235.935
T374409	KCCAT31	-0.3675	0.062	0.421431	226.99	298.488
T059038	CAT1358.2	-0.3729	0.062	0.421431	6.83334	8.55564
T270263	SNHG8.2	-0.42	0.062	0.421431	726.064	989.268
T081143	AMAT79	-0.3523	0.062	0.421431	41.0576	59.9027
T300038	HCG15	0.3737	0.062	0.421431	69.9866	127.657
T046559	KHCAT464	-0.3644	0.062	0.421431	20.4446	27.2017
T018051	CAT94.2	-0.44918	0.063	0.42225	5.45749	7.79859
T204814	KCCAT505	-0.3465	0.063	0.42225	12.152	18.42
T158629	BRCAT302.1	-0.4258	0.063	0.42225	1.63417	4.01133
T134013	MEAT102.2	-0.3834	0.063	0.42225	5.44319	7.14041
T165577	GBAT5	-0.3434	0.063	0.42225	43.6949	59.0621
T340634	KCCAT306	-0.4376	0.063	0.42225	13.2927	24.8889
T111204	CAT1707	0.38893	0.063	0.42225	47.7582	65.4138
T079735	KCCAT608	0.3797	0.063	0.42225	4.53385	7.37068
T243101	CAT407.2	-0.3747	0.063	0.42225	252.81	311.597
T009216	CAT40.1	-0.3638	0.064	0.42225	168.234	194.106
T048059	SH3PXD2A-AS1.2	-0.426	0.064	0.42225	38.4848	77.6526
T006614	SNHG12.3	-0.361	0.064	0.42225	375.536	495.943
T006269	MEAT152	-0.3816	0.064	0.42225	18.9964	24.3163
T052557	CAT1324	-0.3344	0.064	0.42225	49.9607	74.6797
T164341	PRCAT275	-0.3634	0.064	0.42225	13.3372	19.6246
T340776	CAT1016	-0.4126	0.064	0.42225	130.777	163.403
T196839	CAT297	0.3938	0.064	0.42225	11.0285	23.2297
T126553	THCAT435	-0.4124	0.064	0.42225	2.68218	4.8601
T264717	CAT545	-0.4201	0.064	0.42225	5.47992	7.85372
T104423	CAT1663	-0.3577	0.064	0.42225	25.585	39.668
T037552	HNCAT236	-0.4302	0.065	0.425722	2.16851	3.73
T206255	OVAT10.1	0.3548	0.065	0.425722	42.7677	57.4129
T266820	CAT565	-0.3567	0.065	0.425722	211.402	295.518
T032788	CAT186.1	-0.3866	0.065	0.425722	45.1951	70.1726
T194499	HNCAT43	-0.4259	0.065	0.425722	2.26693	26.141
T074090	CAT1473.1	-0.3721	0.066	0.429765	23.1684	38.3787
T225329	CAT2203.1	-0.3359	0.066	0.429765	65.4221	87.2312
T153690	CAT1975	-0.3611	0.066	0.429765	61.7001	73.8816
T266371	CAT556	-0.3465	0.066	0.429765	150.206	204.124
T314610	LSCAT171	0.3899	0.067	0.433138	5.54731	9.24701
T151540	LACAT210	-0.4081	0.067	0.433138	54.2663	61.3112
T020993	CAT112.1	0.3562	0.067	0.433138	228.983	317.796
T229382	KHCAT221	-0.407	0.067	0.433138	5.7065	7.46452
T087732	KCCAT412	-0.41458	0.067	0.433138	9.78914	13.8244
T249152	CAT437	-0.4112	0.068	0.435219	5.96545	22.9778
T249270	CAT439	-0.3916	0.068	0.435219	265.921	322.852
T379447	BRCAT349	-0.3731	0.068	0.435219	18.5519	321.283
T002220	LSCAT241	-0.398	0.068	0.435219	29.6176	45.8108
T354382	HNCAT161	-0.3974	0.068	0.435219	63.3667	76.1576
T140923	THCAT444	-0.4218	0.068	0.435219	2.0474	3.11734
T175100	CAT2102.2	-0.3511	0.068	0.435219	70.6695	111.398
T213034	OVAT23	-0.37106	0.069	0.43726	88.9265	119.98
T115110	OVAT253	-0.3748	0.069	0.43726	22.6119	32.3627
T044153	MEAT126	-0.3768	0.069	0.43726	73.6488	85.7059
T262371	LSCAT210	-0.3909	0.069	0.43726	97.1617	206.303
T354522	KHCAT72	-0.4236	0.069	0.43726	3.30361	5.64093
T153628	LINC00511.5	-0.3863	0.069	0.43726	26.7874	36.6116
T147743	CAT1934	-0.4257	0.069	0.43726	1.98577	4.1832
T181757	CVAT26	-0.3943	0.07	0.438647	2.88496	4.74745
T362264	CAT1163	-0.3928	0.07	0.438647	4.18149	6.29811
T023519	CAT124	-0.3334	0.07	0.438647	17.243	32.431
T245054	CAT422	-0.4278	0.07	0.438647	14.3419	18.0799
T029621	MIR205HG.7	-0.3793	0.07	0.438647	2184.15	3009.92
T351742	KCCAT622	0.36922	0.07	0.438647	23.5389	32.887
T031798	CAT176	-0.3914	0.07	0.438647	138.85	174.331
T025154	HICLINC24.1	-0.405	0.07	0.438647	1.11852	1.74741
T174146	CAT2097	-0.3303	0.071	0.440612	36.9336	47.2176
T251102	CAT453.1	-0.4043	0.071	0.440612	367.446	435.706
T015862	MPAT10	-0.367	0.071	0.440612	26.6628	52.9108
T016134	KCCAT131.2	-0.3944	0.071	0.440612	17.8832	53.4523
T367340	CAT1202.2	-0.3565	0.071	0.440612	18.6449	42.823
T010080	LINC01144	-0.3668	0.071	0.440612	26.6292	42.1353
T231418	MIAT.2	-0.3695	0.071	0.440612	335.132	618.459
T121844	LSCAT192	-0.4772	0.072	0.441934	8.81904	22.3154
T144723	UTAT55	-0.3619	0.072	0.441934	12.6161	18.7855
T326446	KCCAT291	-0.4033	0.072	0.441934	3.177	4.2846
T147078	CAT1931	-0.3479	0.072	0.441934	79.1353	107.887
T356437	MIR31HG.2	0.361026	0.072	0.441934	81.838	184.409
T340308	CAT1010	0.3422	0.072	0.441934	7.4796	18.2832
T158433	KCCAT621	-0.3328	0.072	0.441934	152.652	182.669
T238611	CAT388	-0.3879	0.072	0.441934	15.8069	28.5404
T072488	CAT1465.1	-0.3758	0.073	0.445033	34.4831	41.5906
T198160	CAT303.1	-0.4193	0.073	0.445033	6.15511	9.0989
T179427	KHCAT1	0.3412	0.073	0.445033	28.4255	121.102
T334294	CAT985	-0.3577	0.073	0.445033	97.8804	186.779
T304063	CAT803	-0.3469	0.073	0.445033	44.6536	61.973
T301669	CAT789	-0.332	0.074	0.445686	502.007	646.22
T171425	MEAT117	-0.3541	0.074	0.445686	14.2023	37.6395
T252253	WWTR1-AS1.1	0.3688	0.074	0.445686	33.3921	40.0711
T366746	CAT1197	-0.3549	0.074	0.445686	44.1715	56.9785
T213648	CAT2142.2	-0.3659	0.074	0.445686	0.35731	1.71199
T179786	KCCAT550	-0.3921	0.074	0.445686	6.52532	11.6825
T190091	CAT244	-0.4222	0.074	0.445686	182.519	306.187
T353044	CAT1113.2	-0.40362	0.074	0.445686	38.9686	52.5237
T149738	HOXB-AS2.2	0.33299	0.074	0.445686	53.4432	206.849
T256885	TPRG1-AS2	-0.3846	0.075	0.44751	19.6771	44.4026
T238020	CAT385.1	0.3653	0.075	0.44751	204.211	264.433
T078005	CAT1507	0.3894	0.075	0.44751	5.36257	9.59183
T354380	KHCAT269	-0.3429	0.075	0.44751	29.3326	36.5208
T017617	KCCAT16.2	-0.39453	0.075	0.44751	7.50821	13.0415
T047062	THCAT463	-0.3874	0.075	0.44751	8.90755	11.2357
T073806	CAT1471	-0.31828	0.075	0.44751	28.6129	39.9573
T115171	LACAT212	-0.3278	0.076	0.449892	122.355	172.408
T177754	KCCAT149	-0.3557	0.076	0.449892	58.0951	74.6011
T203136	CAT334	-0.4214	0.076	0.449892	6.30813	11.4811
T312317	LSCAT188	-0.4205	0.076	0.449892	10.3643	13.5023
T304228	KCCAT83.2	0.3294	0.076	0.449892	5.40041	9.70132
T111839	CAT1710.2	-0.4136	0.076	0.449892	634.81	813.685
T279552	CAT647.1	-0.3887	0.077	0.45047	46.5808	65.453
T361617	CAT1159	-0.3282	0.077	0.45047	28.9095	71.0868
T340480	CAT1012.1	0.3708	0.077	0.45047	13.7449	44.0729
T050283	CAT1315	-0.35	0.077	0.45047	23.0199	28.7595
T190140	ESAT114	-0.3638	0.077	0.45047	111.973	171.224
T256376	LSCAT218	-0.399	0.077	0.45047	2.42267	24.1429
T230105	AMAT168	-0.377	0.077	0.45047	2.26293	3.1156
T123255	CAT1791.2	-0.3823	0.077	0.45047	9.3686	12.6209
T231133	KCCAT319.2	-0.3517	0.077	0.45047	9.98192	12.0823
T082756	THCAT547	-0.3754	0.078	0.454545	12.1193	15.3977
T044199	CAT1278	-0.3523	0.078	0.454545	38.8194	58.1443
T059852	CAT1362.3	-0.3482	0.078	0.454545	42.9001	78.1547
T101373	PRCAT308	-0.3557	0.079	0.457996	108.827	158.106
T099198	SMAT2	0.3369	0.079	0.457996	117.157	194.906
T368418	HNCAT22	-0.3435	0.079	0.457996	5.8596	16.6054
T110609	PNAT65	-0.3726	0.079	0.457996	1.52913	2.73929
T131417	OVAT255	-0.3578	0.08	0.459642	24.0125	88.3996
T121246	AMAT30	-0.3324	0.08	0.459642	62.9608	86.6184
T274242	THCAT519	-0.3384	0.08	0.459642	17.002	23.8182
T144746	OVAT145	-0.3448	0.08	0.459642	9.36338	11.2387
T244875	CAT420	0.3537	0.08	0.459642	3.6494	5.14295
T342967	CAT1035.1	-0.3507	0.08	0.459642	16.3526	48.7322
T144704	AMAT31	-0.3828	0.08	0.459642	61.9825	69.3043
T101759	UTAT29	-0.3982	0.081	0.462431	18.8628	24.1986
T248116	CAT431.1	-0.3494	0.081	0.462431	4.77366	17.736
T369399	SNHG7.2	-0.3559	0.081	0.462431	966.63	1446.07
T290497	LSCAT278.2	-0.3924	0.081	0.462431	12.4253	16.8762
T014435	CAT74	-0.3779	0.081	0.462431	57.4963	70.0492
T233878	CAT2249	-0.3729	0.082	0.465184	69.6984	102.403
T308580	BLCAT4	0.35	0.082	0.465184	56.9627	75.1106
T191277	CAT261	-0.3422	0.082	0.465184	29.3593	39.5468
T019451	BRCAT22	-0.3925	0.082	0.465184	78.1546	106.474
T225404	LINC00649.2	-0.3354	0.082	0.465184	111.319	169.347
T043199	CAT1269	-0.3565	0.083	0.465567	28.1519	52.0534
T118493	IQCH-AS1	-0.3455	0.083	0.465567	101.012	135.233
T149607	CAT1946	-0.3639	0.083	0.465567	107.205	154.393
T260275	OVAT122	-0.4011	0.083	0.465567	6.67048	12.3381
T292019	KCCAT386	-0.3284	0.083	0.465567	5.19916	9.91133
T290750	KCCAT34	0.3395	0.083	0.465567	9.26957	17.4588
T203141	CAT335	-0.413	0.083	0.465567	14.9638	23.2145
T162087	KHCAT447	0.3447	0.083	0.465567	1.57328	2.71437
T267013	LINC01088.14	-0.348	0.083	0.465567	16.7638	23.4818
T287543	CAT701.2	-0.3344	0.084	0.466517	8.44129	11.6303
T339244	CAT1007.2	-0.3281	0.084	0.466517	190.249	239.506
T048489	KCCAT62	0.3621	0.084	0.466517	3.6415	5.05424
T342446	CAT1026	-0.3719	0.084	0.466517	13.5378	18.2186
T374160	KCCAT468	-0.3548	0.084	0.466517	114.029	148.318
T065380	CAT1406.1	0.3806	0.084	0.466517	4.54342	10.489
T319854	BRCAT281	-0.3852	0.084	0.466517	3.75031	8.02614
T174217	LSCAT237	-0.38267	0.084	0.466517	51.6476	62.1223
T055045	CAT1337.2	-0.3442	0.085	0.469171	643.738	910.856
T294567	THCAT515	-0.3225	0.085	0.469171	5.10027	10.3935
T287339	EPB41L4A-AS1.3	-0.3554	0.085	0.469171	446.507	673.67
T190667	CAT252.3	-0.4083	0.085	0.469171	25.6251	37.5728
T029622	MIR205HG.10	-0.3896	0.085	0.469171	472.41	998.727
T363533	MPAT12	-0.359	0.086	0.471792	104.181	119.369
T029615	MIR205HG.3	-0.3573	0.086	0.471792	105.826	182.625
T363565	LSCAT5	-0.3574	0.086	0.471792	433.625	849.693
T022373	CAT121.2	-0.34264	0.086	0.471792	25.4781	41.656
T153640	LSCAT59.1	-0.4147	0.086	0.471792	27.0632	41.4549
T027830	CAT149.1	0.3395	0.087	0.474382	25.2136	40.1255
T257703	TMEM44-AS1.3	-0.371	0.087	0.474382	29.5948	44.5259
T379238	CAT2308.2	-0.339	0.087	0.474382	4.47894	6.35431
T299079	KPCAT13	-0.3194	0.087	0.474382	49.5476	75.2338
T274488	CAT604.2	0.3731	0.087	0.474382	15.7925	25.8848
T335236	CAT991	-0.2981	0.088	0.475793	175.365	216.109
T131736	KHCAT193	-0.374	0.088	0.475793	3.60712	4.52314
T203015	CAT329	0.347	0.088	0.475793	209.243	302.701
T030338	CAT162.1	-0.3512	0.088	0.475793	1061.5	1302.56
T165251	CAT2040	-0.3544	0.088	0.475793	14300.4	19154.5
T002518	KCCAT628	-0.3253	0.088	0.475793	64.5156	75.6391
T204732	THCAT389	-0.3734	0.088	0.475793	15.0961	19.7169
T322202	INHBA-AS1	0.3263	0.089	0.47775	9.90066	63.3101
T100135	CAT1635	-0.3338	0.089	0.47775	6.31645	21.2385
T189081	THCAT323	-0.3684	0.089	0.47775	13.5658	18.0482
T007825	CAT35	-0.4105	0.089	0.47775	3.03025	18.0008
T049556	CAT1310	-0.34763	0.089	0.47775	6.91027	14.298
T129652	CAT1836	-0.38364	0.089	0.47775	89.6607	119.892
T284898	CAT682.1	-0.3457	0.09	0.478544	65.9609	80.8642
T234255	CAT2251.1	-0.3573	0.09	0.478544	31.4969	51.8631
T130808	CMAT9	-0.3264	0.09	0.478544	2.41934	4.36256
T141594	CAT1902	-0.3498	0.09	0.478544	21.5657	35.8886
T341428	KHCAT270	-0.3523	0.09	0.478544	16.0728	24.6712
T043181	OVAT72	-0.3354	0.09	0.478544	18.8216	22.174
T017590	KCCAT16.3	-0.3383	0.09	0.478544	8.97873	12.2951
T151775	OVAT163	-0.3466	0.09	0.478544	4.51094	5.46865
T150081	CAT1949	-0.4086	0.091	0.481015	887.438	1128.02
T136859	UTAT61	-0.3092	0.091	0.481015	3.29657	4.32015
T203112	CAT331.5	-0.3823	0.091	0.481015	8.17683	12.2483
T154311	CAT1980	-0.3479	0.091	0.481015	32.6865	42.8541
T117110	CAT1750	0.34148	0.091	0.481015	299.978	537.011
T231704	CAT2235.1	-0.3449	0.092	0.484591	19.5018	23.9886
T258634	CAT503	-0.3867	0.092	0.484591	138.996	205.092
T044454	LACAT155	-0.3621	0.092	0.484591	1.71132	5.05738
T253102	LINC00886.1	-0.3256	0.093	0.487839	13.1532	32.949
T178055	CAT2119	-0.3382	0.093	0.487839	15.3298	26.0746
T360998	CAT1157	-0.3069	0.093	0.487839	41.7284	53.6935
T203783	TTN-AS1.2	0.3262	0.094	0.487839	11.284	16.9312
T000779	OVAT106.2	-0.3569	0.094	0.487839	50.9476	72.9098
T007865	ZMYM4-AS1	0.3384	0.094	0.487839	16.1211	22.6269
T298538	CAT777	0.3382	0.094	0.487839	8.47918	20.8967
T032228	BRCAT81	0.33717	0.094	0.487839	9.41956	11.1404
T194118	CAT274.4	-0.3947	0.095	0.487839	5.94772	16.2467
T299722	ZSCAN16-AS1	-0.3236	0.095	0.487839	201.029	267.769
T172965	KHCAT3.2	-0.3201	0.095	0.487839	27.9056	39.5875
T004294	PRCAT239	0.3017	0.095	0.487839	30.4717	75.9588
T139646	LGAT37	-0.3676	0.096	0.487839	33.5528	60.7342
T336992	MNX1-AS1.2	0.3631	0.096	0.487839	17.7375	53.1978
T305296	THCAT605	-0.3107	0.096	0.487839	6.60802	9.76974
T039155	CAT1245.2	-0.332	0.097	0.487839	46.4307	61.348
T158873	CAT2000	-0.3355	0.097	0.487839	26.5828	31.539
T029619	MIR205HG.4	-0.3597	0.097	0.487839	3703.26	5307.03
T164908	THCAT496	-0.3162	0.097	0.487839	117.888	151.885
T026483	BLCAT7	-0.3395	0.097	0.487839	8.55484	12.269
T289807	CAT722	-0.3178	0.097	0.487839	120.79	141.512
T086691	OVAT140	-0.3395	0.097	0.487839	1.68606	2.56569
T087725	CAT1575.2	0.3469	0.097	0.487839	452.348	475.18
T206429	KHCAT121	-0.3349	0.097	0.487839	3.87337	6.78262
T048755	HICLINC251.1	-0.348	0.097	0.487839	7.90114	11.592
T305288	CAT815	-0.3558	0.098	0.487839	2.40307	3.87102
T200010	CAT313.7	-0.3533	0.098	0.487839	2.69519	4.17117
T046156	TNKS2-AS1	-0.3304	0.098	0.487839	22.4266	33.5129
T353733	FAM83H-AS1.4	-0.3546	0.099	0.487839	1472.68	1899.21
T358161	CAT1141.2	0.3033	0.099	0.487839	889.92	1132.91
T148470	ASB16-AS1.3	-0.3605	0.099	0.487839	35.6013	45.4472
T231721	KCCAT439	-0.3841	0.099	0.487839	5.30682	7.13014
T281235	LIFR-AS1.2	-0.3355	0.099	0.487839	27.6348	64.7856
T264423	CAT542.2	-0.3491	0.099	0.487839	7.70835	12.8907
T031878	MBAT102	-0.3496	0.1	0.487839	121.276	144.867
T183455	THCAT532	0.33	0.1	0.487839	36.6044	56.0758
T120518	KCCAT341	-0.3225	0.1	0.487839	42.6477	61.078
T010208	BRCAT61	-0.3326	0.1	0.487839	8.37439	12.9234
T256941	LSCAT222	-0.3248	0.1	0.487839	3.57676	8.90088
T005018	THCAT621	-0.3392	0.1	0.487839	531.467	604.03
T005221	KCCAT549	-0.3269	0.1	0.487839	28.787	43.8814
T312067	CAT867	-0.3246	0.1	0.487839	47.0786	81.8923
T063065	CAT1388.1	0.3367	0.1	0.487839	10.0803	25.5609
T070407	CAT1446	-0.317	0.1	0.487839	14.4698	17.7546
T123752	KCCAT345	-0.3681	0.1	0.487839	4.73622	5.98929
T375584	CAT2286	-0.3228	0.1	0.487839	52.2115	79.2148
T296014	KCCAT522	-0.3372	0.1	0.487839	11.0306	14.1266
T131773	AMAT127	-0.3469	0.1	0.487839	2.58402	3.24472
T228870	KCCAT271	-0.3366	0.1	0.487839	4.27759	10.6892
T205537	CAT352.2	-0.3312	0.1	0.487839	4.75128	9.95408
T150923	CAT1954.1	-0.3578	0.1	0.487839	14.4056	25.7566
T363120	LACAT240	-0.346	0.1	0.487839	89.235	107.367
T152001	THCAT91	0.3154	0.1	0.487839	3.07536	5.37104
T052945	CAT1326	-0.3228	0.1	0.487839	4.12568	7.05255
T342254	THCAT322	-0.3347	0.1	0.487839	6.16548	7.47981
T154635	OVAT92	0.3305	0.1	0.487839	81.2173	108.95
T016620	CAT85	-0.3071	0.1	0.487839	8.15753	12.497
T195256	CAT281	-0.3382	0.1	0.487839	1.59647	2.84249
T223717	CAT2192	-0.3682	0.1	0.487839	14.4455	38.9954
T031483	AMAT64	-0.2943	0.1	0.487839	72.2373	94.0315
T234606	CAT2254.1	-0.3595	0.1	0.487839	65.5811	118.458
T335777	CAT995	-0.3388	0.1	0.487839	3.3738	5.80348
T271860	KCCAT595	-0.3234	0.1	0.487839	13.5018	18.5162
T223863	CAT2194	-0.3514	0.1	0.487839	475.943	629.691
T077823	CAT1505	-0.3367	0.1	0.487839	4.29081	7.17674
T274723	LACAT254	-0.3163	0.1	0.487839	26.8046	34.0158
T146120	HICLINC339	-0.3713	0.1	0.487839	16.2027	21.85
T172634	HICLINC365.2	-0.3493	0.1	0.487839	6.48481	9.01144
T348280	CAT1070	-0.3444	0.11	0.505348	34.284	46.6547
T098325	FGF14-IT1	0.2897	0.11	0.505348	21.0349	47.594
T333063	UTAT11	-0.3139	0.11	0.505348	3.80687	7.87855
T285014	BRCAT178	-0.3466	0.11	0.505348	6.94373	13.4897
T128529	CAT1827	-0.3376	0.11	0.505348	20.0053	23.4559
T043563	UNC5B-AS1.1	0.3508	0.11	0.505348	25.5754	94.7956
T170471	KCCAT173	-0.347	0.11	0.505348	60.9495	79.8018
T196864	CVAT39	-0.3193	0.11	0.505348	13.7545	18.9635
T012421	CAT62.1	-0.3406	0.11	0.505348	26.9625	75.6078
T377770	BRCAT300	-0.3212	0.11	0.505348	28.7489	41.7726
T140211	HNCAT52	-0.3751	0.11	0.505348	10.8636	19.71
T167528	CAT2057	-0.3287	0.11	0.505348	5.72153	10.2403
T305611	BRCAT262	0.3108	0.11	0.505348	4.9824	9.42879
T353730	FAM83H-AS1.1	0.3134	0.11	0.505348	1649.08	2130.04
T204582	CAT345	-0.2966	0.11	0.505348	52.1839	62.3595
T312362	CAT870.1	0.2898	0.11	0.505348	18.2515	24.1044
T240667	GBAT1	-0.2996	0.11	0.505348	189.217	241.785
T114827	THCAT386	-0.3155	0.11	0.505348	69.2345	93.1673
T272835	CAT593.1	-0.2973	0.11	0.505348	13.8417	20.6767
T140194	HRAT3	-0.3224	0.11	0.505348	31.3286	40.7455
T036012	LINC00702.2	0.3351	0.11	0.505348	5.24053	16.9822
T237125	BRCAT84	-0.3395	0.11	0.505348	4.1271	6.10434
T022094	RUSC1-AS1.1	-0.33228	0.11	0.505348	866.716	1229.8
T241915	KIF9-AS1.1	-0.3142	0.11	0.505348	16.4269	19.0695
T080345	KCCAT478	-0.3169	0.11	0.505348	32.9946	41.7382
T065358	KHCAT116	0.3108	0.11	0.505348	4.21665	10.0698
T044194	CAT1277	-0.37485	0.11	0.505348	39.0849	47.3517
T232196	TUG1.3	0.3042	0.11	0.505348	831.472	1054.46
T104333	LINC00519	-0.342	0.11	0.505348	59.875	207.691
T015544	CAT80.2	0.3128	0.11	0.505348	49.7869	88.9532
T126462	PRCAT204	-0.3336	0.11	0.505348	6.14734	12.8041
T376030	CAT2288	-0.3176	0.11	0.505348	68.7632	97.9349
T023578	CAT126.2	-0.2948	0.11	0.505348	23.9388	29.8235
T026671	PRCAT280	-0.3185	0.11	0.505348	12.2826	18.8101
T160532	CAT2009.1	0.2845	0.11	0.505348	14.8598	27.4385
T054988	THCAT118	-0.328	0.11	0.505348	116.338	211.493
T027468	KCCAT312	-0.3041	0.11	0.505348	17.423	36.3191
T297706	HRAT9	-0.3244	0.11	0.505348	127.234	154.681
T343836	KHCAT83	-0.3067	0.11	0.505348	80.2421	103.93
T193188	CAT268	-0.3316	0.11	0.505348	1.45489	1.8158
T259867	KCCAT268	-0.3638	0.11	0.505348	45.8744	91.2844
T042582	MEAT134	-0.3163	0.11	0.505348	14.5393	19.6925
T336230	LINC01003	-0.2984	0.11	0.505348	258.203	316.084
T047668	BRCAT325	-0.3254	0.11	0.505348	3.20049	5.08098
T256544	CMAT7	0.3249	0.11	0.505348	10.7717	18.1814
T165059	CAT2037.2	-0.3246	0.11	0.505348	55.4044	69.0978
T342965	CAT1035.2	-0.3361	0.11	0.505348	103.236	234.576
T054686	SBF2-AS1.5	-0.3076	0.11	0.505348	71.2652	125.1
T225274	KCCAT252	0.3126	0.11	0.505348	11.1407	15.9691
T041731	CAT1259.3	-0.3006	0.11	0.505348	41.4703	90.5647
T096177	LSCAT16.1	0.3089	0.11	0.505348	18.9688	105.337
T350921	CAT1095	-0.3437	0.11	0.505348	14.1392	18.3657
T291304	KCCAT238	0.305	0.11	0.505348	47.3934	82.3928
T177788	KCCAT515	-0.3129	0.11	0.505348	65.0553	83.5465
T245060	CAT423	-0.3346	0.11	0.505348	4.78433	7.95184
T116773	CAT1745.1	-0.3854	0.11	0.505348	14.1882	35.1788
T027939	IPO9-AS1	-0.3357	0.11	0.505348	38.5998	55.032
T169470	OVAT116	-0.2936	0.12	0.522949	4.9934	7.12635
T214861	KHCAT163	-0.293	0.12	0.522949	3.19985	4.45681
T368114	CAT1206.2	-0.32	0.12	0.522949	4.81258	11.3573
T350782	RNF139-AS1.2	-0.29654	0.12	0.522949	109.216	141.41
T086002	KPCAT49	-0.30275	0.12	0.522949	2.43332	3.65775
T181776	ZNF667-AS1.2	-0.3151	0.12	0.522949	22.6224	100.148
T058451	CAT1355	-0.2834	0.12	0.522949	127.383	198.164
T268004	FAM13A-AS1	-0.3192	0.12	0.522949	47.1924	64.2178
T174866	MEAT110	-0.3272	0.12	0.522949	15.0869	26.361
T364389	PRCAT37.3	-0.3206	0.12	0.522949	2.30254	3.85471
T366403	MIR181A2HG.1	-0.3384	0.12	0.522949	10.7124	27.9216
T032818	CAT187.2	-0.3276	0.12	0.522949	2.08996	3.63257
T348942	CVAT37	-0.3071	0.12	0.522949	2.13617	4.09379
T166536	KCCAT275	-0.3244	0.12	0.522949	174.064	221.178
T178870	CAT2122	-0.2969	0.12	0.522949	145.597	181.699
T150428	CAT1952.2	-0.3195	0.12	0.522949	10.9583	19.0476
T209773	CAT376	-0.3105	0.12	0.522949	85.3008	105.673
T180224	KCCAT467	-0.3398	0.12	0.522949	14.149	32.3462
T327806	CAT949.2	-0.3421	0.12	0.522949	35.4503	49.4238
T281865	BRCAT54.4	0.3046	0.12	0.522949	4.61743	10.48
T119212	ADPGK-AS1.1	0.3114	0.12	0.522949	31.3139	41.212
T029618	MIR205HG.5	-0.3531	0.12	0.522949	201.441	499.646
T023592	CAT129	-0.3051	0.12	0.522949	311.061	417.271
T341567	BRCAT397	-0.3339	0.12	0.522949	4.31148	17.6932
T116064	CMAT29	-0.302	0.12	0.522949	12.5418	21.6317
T328268	CAT954	-0.3395	0.12	0.522949	48.2989	76.8945
T382719	CAT2322	-0.3155	0.12	0.522949	10.1128	29.5157
T314089	CAT882.4	-0.3285	0.12	0.522949	0.681461	1.03398
T295443	TRIM52-AS1.1	-0.3447	0.12	0.522949	257.765	346.617
T127301	KHCAT82	0.33374	0.12	0.522949	138.427	190.165
T239553	LINC00693	-0.3444	0.12	0.522949	2.9424	5.86229
T181966	CAT2134.2	-0.2968	0.12	0.522949	945.857	1140.29
T045002	LINC00857.1	0.31797	0.12	0.522949	127.534	172.304
T114658	SRP14-AS1.1	0.29	0.12	0.522949	22.5663	40.8521
T211428	HNCAT283	0.30739	0.12	0.522949	35.6462	80.745
T309701	KCCAT45	-0.3247	0.12	0.522949	43.0277	87.2204
T058080	CAT1353	-0.302	0.12	0.522949	154.28	192.996
T127042	MPAT2	-0.3053	0.12	0.522949	2657.56	3230.69
T004822	LACAT2.2	-0.3485	0.12	0.522949	17.8755	91.2468
T228000	LINC00316	0.3366	0.12	0.522949	3.10589	7.34754
T071783	CAT1458.2	-0.2859	0.12	0.522949	30.8171	39.7369
T244195	CAT412	0.2944	0.12	0.522949	4.91847	10.3555
T260989	CAT514	0.3699	0.12	0.522949	2.24201	10.0281
T227258	CAT2216.1	-0.3092	0.12	0.522949	142.017	297.497
T367341	CAT1202.3	0.3114	0.12	0.522949	297.22	513.137
T260537	THCAT70.2	-0.3408	0.12	0.522949	12.3585	19.6619
T037129	AMAT142	-0.3039	0.12	0.522949	4.48674	9.3046
T263264	CAT534	-0.3072	0.12	0.522949	48.5057	69.2064
T084753	TMPO-AS1	-0.3858	0.12	0.522949	433.661	561.652
T317019	HNCAT160	0.3358	0.12	0.522949	9.4019	13.7268
T287319	STARD4-AS1	0.30102	0.12	0.522949	62.0523	135.135
T172092	CAT2091	-0.3201	0.12	0.522949	37.62	47.2692
T192140	LBX2-AS1.3	0.3096	0.12	0.522949	106.693	134.512
T074099	CAT1473.2	-0.2722	0.13	0.539824	336.475	593.383
T335392	LSCAT17	-0.2982	0.13	0.539824	12.8052	24.1563
T351663	CAT1101.1	-0.3014	0.13	0.539824	210.367	545.608
T072269	CAT1461	-0.3456	0.13	0.539824	39.2486	76.5677
T006482	CAT29	0.2862	0.13	0.539824	32.7789	46.9502
T272854	MEAT135	-0.28767	0.13	0.539824	18.5541	27.2361
T167588	KCCAT406	-0.3032	0.13	0.539824	169.496	205.657
T296589	PRCAT13.3	-0.3246	0.13	0.539824	26.7502	36.1485
T272992	CAT597	-0.308	0.13	0.539824	25.7991	38.4064
T177755	KCCAT193	-0.305	0.13	0.539824	65.4457	83.3252
T031097	CAT172	0.3102	0.13	0.539824	58.8741	78.3131
T212847	UBOX5-AS1.1	-0.3644	0.13	0.539824	5.83613	7.13467
T105624	HIF1A-AS2.1	0.2921	0.13	0.539824	24.7247	47.565
T150288	CAT1950.1	-0.322	0.13	0.539824	5.99883	9.00664
T018596	CAT99.2	0.3218	0.13	0.539824	179.596	224.6
T006619	SNHG12.2	-0.2888	0.13	0.539824	135.601	175.051
T109097	MBAT98	-0.316	0.13	0.539824	19.6976	29.0417
T119156	ESAT113	-0.2855	0.13	0.539824	138.92	182.853
T165113	LSCAT118	-0.287	0.13	0.539824	14.5173	27.4458
T347941	CAT1065.2	-0.2934	0.13	0.539824	139.505	196.958
T242348	CAT403.1	-0.3082	0.13	0.539824	307.071	357.734
T337673	CAT1002.1	0.3129	0.13	0.539824	75.9609	105.167
T147503	CAT1933.1	-0.3233	0.13	0.539824	72.0343	141.689
T277645	CAT637	0.2847	0.13	0.539824	52.7174	76.384
T248388	PRCAT151	-0.3303	0.13	0.539824	2.03254	3.00737
T178407	KCCAT476	-0.2995	0.13	0.539824	71.1568	98.9594
T126061	BRCAT259.2	-0.2982	0.13	0.539824	10.4381	16.4355
T043645	CAT1272	-0.3076	0.13	0.539824	30.0331	45.5517
T155521	KPCAT17	-0.33212	0.13	0.539824	24.57	40.9359
T151419	BZRAP1-AS1.1	-0.2878	0.13	0.539824	40.9971	54.7564
T232829	HNCAT71.2	-0.31	0.13	0.539824	81.2979	111.704
T327271	CAT946.2	-0.3291	0.13	0.539824	208.016	278.592
T039852	PNAT129	-0.3315	0.13	0.539824	25.7358	71.9714
T203388	HOXD-AS2.2	0.3013	0.13	0.539824	16.384	25.6722
T139540	AMAT138	-0.317	0.13	0.539824	5.29046	6.7823
T178086	OVAT260	-0.3052	0.13	0.539824	378.685	461.085
T005060	THCAT138	-0.3151	0.13	0.539824	8.25559	12.4294
T177234	CAT2112	-0.2875	0.13	0.539824	21.9983	27.0804
T363206	THCAT539	-0.2667	0.13	0.539824	6.9192	9.34054
T108066	CAT1694.2	0.3031	0.13	0.539824	12.3857	16.3418
T079734	KCCAT430	0.3149	0.13	0.539824	10.2756	17.3855
T120968	KHCAT119	-0.2856	0.13	0.539824	33.4304	43.1622
T105774	OVAT69	-0.3232	0.13	0.539824	11.5933	17.2576
T044224	CAT1279	-0.309	0.13	0.539824	13.1872	15.9751
T312225	KCCAT178.1	-0.3082	0.13	0.539824	17.5678	36.4671
T034080	BRCAT403	-0.3516	0.13	0.539824	2.2008	10.3066
T252422	THCAT508	-0.3223	0.13	0.539824	48.8335	71.7884
T117964	CAT1763	-0.3092	0.13	0.539824	23.9075	37.568
T087593	PXN-AS1	-0.3384	0.13	0.539824	32.3798	40.8989
T264716	LSCAT56	-0.3172	0.13	0.539824	12.2971	19.0173
T255263	THCAT60	0.29314	0.13	0.539824	28.4467	53.8355
T248987	LSCAT24.1	-0.3022	0.14	0.551772	4.83807	11.8602
T261544	CAT518.2	-0.2841	0.14	0.551772	8.00829	9.57814
T301689	PRCAT15.1	-0.2855	0.14	0.551772	266.851	332.336
T380633	THCAT368	-0.291	0.14	0.551772	25.3897	30.9049
T184450	CAT211.2	-0.2857	0.14	0.551772	16.6263	23.2285
T290795	KCCAT184	-0.2857	0.14	0.551772	12.2913	18.6082
T100407	CAT1640	-0.2731	0.14	0.551772	166.1	241.214
T108899	THCAT584.1	-0.3212	0.14	0.551772	72.179	103.858
T359194	CAT1144.2	-0.3317	0.14	0.551772	105.409	155.377
T116384	CAT1742	-0.3125	0.14	0.551772	8.8497	12.4633
T120550	CAT1777	-0.2803	0.14	0.551772	8.5519	46.6157
T000485	CAT2.2	0.3094	0.14	0.551772	54.7528	110.032
T202995	CAT328.4	-0.287	0.14	0.551772	6.01304	7.05583
T231742	CAT2236	-0.3411	0.14	0.551772	164.148	282.943
T246545	THCAT427	-0.33919	0.14	0.551772	2.13595	3.26531
T314344	EZR-AS1	0.2938	0.14	0.551772	16.5271	34.5211
T110055	KCCAT561	-0.303	0.14	0.551772	8.34636	16.7594
T284856	CAT681	-0.30369	0.14	0.551772	2206.59	2948.17
T128190	CAT1825	-0.3036	0.14	0.551772	1775.25	2242.41
T350693	LSCAT112.2	-0.35	0.14	0.551772	8.13052	28.6804
T165871	UTAT21	-0.3151	0.14	0.551772	51.5422	61.8151
T327807	CAT949.1	-0.2874	0.14	0.551772	7.87472	12.4273
T320563	HOXA-AS3	0.2826	0.14	0.551772	22.2886	35.4289
T233674	KHCAT461	-0.2997	0.14	0.551772	51.9457	66.0805
T203018	KCCAT47	0.2995	0.14	0.551772	12.9522	21.5168
T205083	LACAT88	-0.30573	0.14	0.551772	3.2926	5.90015
T354977	KCCAT454	-0.3051	0.14	0.551772	11.4659	18.971
T239183	GBAT8	-0.3041	0.14	0.551772	93.6326	115.609
T140924	CAT1897	-0.3543	0.14	0.551772	61.877	109.817
T041156	CAT1256	-0.2921	0.14	0.551772	18.9326	26.2359
T203798	TTN-AS1.5	-0.2935	0.14	0.551772	12.7995	17.3213
T296941	MBAT61	-0.342904	0.14	0.551772	31.4455	41.8452
T241166	CAT401.2	-0.2981	0.14	0.551772	632.535	807.145
T203095	LSCAT195	0.288	0.14	0.551772	13.5121	31.3467
T048069	MBAT85	-0.2701	0.14	0.551772	27.9393	49.4912
T036164	THCAT472	-0.2933	0.14	0.551772	31.4778	46.8219
T228577	KCCAT665.2	-0.3306	0.14	0.551772	125.864	498.538
T039853	PNAT109	-0.3237	0.14	0.551772	13.0788	49.9475
T119327	LOXL1-AS1.1	0.2983	0.14	0.551772	69.811	118.446
T052781	KHCAT150	-0.3191	0.14	0.551772	6.60804	14.2922
T301221	HNCAT144	-0.3331	0.14	0.551772	8.57798	12.2065
T300589	MDC1-AS1	0.2807	0.14	0.551772	40.765	56.8955
T101762	KHCAT241	0.30753	0.14	0.551772	14.976	19.7074
T314457	KCCAT457	-0.301	0.14	0.551772	4.87686	10.7882
T288870	CAT714	-0.2962	0.14	0.551772	181.419	283.365
T153625	LINC00673	0.2905	0.14	0.551772	78.265	101.73
T226959	CAT2213.4	0.3379	0.14	0.551772	17.2183	47.3675
T184047	CAT203.2	-0.2638	0.14	0.551772	143.959	174.385
T375948	IGBP1-AS2	-0.2873	0.14	0.551772	103.824	134.288
T322083	CAT931	-0.2853	0.14	0.551772	39.52	52.3329
T040306	BRCAT425	0.291	0.14	0.551772	4.12715	8.80792
T077424	THCAT241	-0.303	0.14	0.551772	50.5591	69.4394
T357646	KCCAT506.1	-0.2838	0.14	0.551772	15.3201	25.6413
T259778	NOP14-AS1.2	-0.2933	0.14	0.551772	21.5156	33.2337
T049322	CASC2.2	0.2581	0.14	0.551772	22.2747	56.6221
T164487	AMAT75	-0.2787	0.14	0.551772	16.1653	23.5592
T363057	HICLINC233.1	-0.3372	0.14	0.551772	16.763	26.543
T189930	HICLINC44.1	-0.2733	0.14	0.551772	3.54561	4.31707
T261545	CAT518.1	-0.2716	0.15	0.565394	7.71947	9.2644
T301683	PRCAT30.2	-0.2928	0.15	0.565394	178.94	269.781
T219474	ZFAS1.2	-0.3036	0.15	0.565394	2515.27	3338.98
T200005	CAT313.2	0.2404	0.15	0.565394	10.9637	14.7944
T196823	CAT296.1	-0.2488	0.15	0.565394	19.0967	37.5282
T359954	CAT1147.2	-0.2663	0.15	0.565394	12.6178	21.2219
T117477	CAT1756.1	-0.2776	0.15	0.565394	19.6588	26.7474
T153012	LACAT7.1	-0.3142	0.15	0.565394	33.8823	54.9364
T252251	WWTR1-AS1.2	-0.2846	0.15	0.565394	30.6422	42.7626
T292950	CAT741	-0.3027	0.15	0.565394	5.22556	8.94774
T040563	CAT1251	-0.292387	0.15	0.565394	99.8298	116.997
T169170	CAT2069.1	0.2797	0.15	0.565394	135.257	234.473
T103126	CAT1655	0.2619	0.15	0.565394	20.6334	33.2509
T300927	CAT786	-0.2956	0.15	0.565394	25.7989	31.2313
T206257	CAT355.2	-0.3003	0.15	0.565394	470.456	600.008
T226026	LSCAT270	0.2907	0.15	0.565394	11.3315	25.5089
T168088	KCCAT138	-0.2635	0.15	0.565394	7.10545	11.6898
T153639	LSCAT59.2	-0.2976	0.15	0.565394	28.9371	41.2834
T295046	CAT754	-0.3121	0.15	0.565394	33.3638	45.8255
T134020	ESAT109	-0.2808	0.15	0.565394	2916	3406.82
T303621	CAT802	-0.264	0.15	0.565394	37.0012	55.6916
T238360	CAT387	-0.3165	0.15	0.565394	74.2164	133.013
T160533	CAT2009.2	0.2938	0.15	0.565394	43.3311	67.3682
T175508	KHCAT54	-0.2871	0.15	0.565394	32.892	47.376
T225451	STCAT11	0.3094	0.15	0.565394	14.2663	18.8745
T299453	CAT782	-0.275	0.15	0.565394	64.4007	124.463
T285803	LUCAT1.2	0.2968	0.15	0.565394	14.4463	34.7597
T296830	LSCAT3.2	-0.30486	0.15	0.565394	57.4025	116.349
T219859	KHCAT238	-0.2498	0.15	0.565394	122.18	156.958
T005671	HNCAT189	-0.3804	0.15	0.565394	11.1939	23.5558
T225820	CAT2208.2	-0.3201	0.15	0.565394	50.9482	72.6728
T226977	CAT2214	0.2813	0.15	0.565394	2.92899	5.68119
T191271	PCBP1-AS1.3	-0.2982	0.15	0.565394	11.8359	14.8616
T050619	BRCAT89	-0.3041	0.15	0.565394	2.91924	4.07586
T035096	CMAT19	-0.2599	0.15	0.565394	17.135	21.4957
T141423	CAT1901.1	0.2768	0.15	0.565394	5.42229	8.99224
T333338	CAT977.1	-0.29	0.15	0.565394	125.518	194.305
T225520	KCCAT162	0.26281	0.15	0.565394	49.2714	71.7977
T167059	CAT2052	-0.2728	0.15	0.565394	415.33	645.955
T011983	CAT58.4	-0.2756	0.15	0.565394	2.171	4.31251
T006599	SNHG12.5	-0.2809	0.15	0.565394	189.025	238.991
T289914	KCCAT74	-0.2712	0.15	0.565394	41.7868	64.4022
T170127	CAT2074	-0.2807	0.15	0.565394	593.055	691.073
T166908	CAT2049.2	0.2748	0.15	0.565394	62.6506	155.869
T244616	ADAMTS9-AS1.4	0.2999	0.15	0.565394	12.984	26.4642
T153991	KCCAT150	-0.365	0.15	0.565394	5.44709	6.69035
T006187	LACAT202	-0.307	0.15	0.565394	5.52252	7.8744
T030943	OVAT258	-0.3177	0.15	0.565394	18.7595	21.0489
T234687	THCAT580	-0.2965	0.15	0.565394	1.60907	2.72256
T152287	CAT1963	-0.2818	0.15	0.565394	109.17	142.985
T192060	KHCAT386	-0.3275	0.15	0.565394	55.1304	77.959
T236103	CAT2266.2	-0.2885	0.15	0.565394	14.7715	22.6748
T182926	UTAT17	-0.2804	0.16	0.578808	25.5337	33.2014
T085712	CAT1565	-0.29	0.16	0.578808	299.812	398.877
T170654	CAT2080.1	-0.2873	0.16	0.578808	67.4795	92.3402
T320704	JAZF1-AS1.2	0.2537	0.16	0.578808	4.49407	5.56453
T039351	THCAT349	-0.2818	0.16	0.578808	1.91659	2.88455
T033590	LGALS8-AS1	0.3193	0.16	0.578808	3.05773	5.11891
T354679	CAT1125.1	-0.2906	0.16	0.578808	8.29331	14.896
T072370	CAT1462	-0.27836	0.16	0.578808	286.377	394.422
T009444	SZT2-AS1	-0.2694	0.16	0.578808	180.556	209.984
T029596	LSCAT121	-0.316	0.16	0.578808	3.57662	7.0706
T184438	KCCAT55	0.297059	0.16	0.578808	11.5028	15.205
T272608	KCCAT540	-0.2767	0.16	0.578808	4.29353	6.85354
T266800	CAT564	-0.2677	0.16	0.578808	4.10758	9.83931
T305330	LSCAT227	-0.3215	0.16	0.578808	4.1158	19.0552
T059580	KHCAT439	0.2788	0.16	0.578808	11.1607	12.7409
T044850	CAT1283	-0.2884	0.16	0.578808	161.666	185.452
T291867	OVAT118	-0.2756	0.16	0.578808	7.45438	10.0251
T033749	CAT192	-0.2777	0.16	0.578808	10.8062	86.7955
T334052	CAT981.1	-0.299	0.16	0.578808	1.77628	4.67885
T259327	CTBP1-AS2.1	-0.2805	0.16	0.578808	392.569	493.759
T240503	CAT398	-0.2595	0.16	0.578808	5.6325	9.14728
T078237	CAT1509	-0.2679	0.16	0.578808	3.76072	6.29181
T110171	CAT1702	-0.2844	0.16	0.578808	8.26636	15.9003
T132708	KCCAT273	-0.2962	0.16	0.578808	5.99463	11.1085
T360964	BRCAT405	-0.313	0.16	0.578808	3.22222	4.3813
T222063	KCCAT154	-0.2423	0.16	0.578808	62.6833	86.7964
T245056	FOXP1-AS1.2	-0.2768	0.16	0.578808	8.42726	11.5849
T270635	OVAT250	-0.2627	0.16	0.578808	7.1315	8.21462
T071276	CAT1452.1	-0.2814	0.16	0.578808	398.407	562.887
T233425	KCCAT248	-0.30696	0.16	0.578808	6.33292	17.2948
T353039	LSCAT155	0.2605	0.16	0.578808	13.7988	27.6521
T170645	THCAT469	-0.29552	0.16	0.578808	18.1024	25.4339
T167068	CAT2053	0.273	0.16	0.578808	25.7681	140.975
T006598	SNHG12.4	-0.258	0.16	0.578808	151.118	187.22
T092266	CAT1592	0.267	0.16	0.578808	18.3578	23.3519
T376626	CAT2290	-0.282804	0.16	0.578808	6.04312	10.7065
T050158	KCCAT334	-0.2873	0.16	0.578808	11.3707	17.1348
T162261	BRCAT296	-0.296	0.16	0.578808	6.23763	7.8114
T245853	BRCAT331	0.324	0.16	0.578808	1.74959	2.67558
T180070	CAT2126	-0.2526	0.16	0.578808	255.066	296.729
T196777	CAT294	0.2883	0.16	0.578808	99.2611	156.048
T255322	LACAT131	-0.2716	0.16	0.578808	160.478	192.75
T326473	GBAT12	-0.3122	0.16	0.578808	2.10258	3.81293
T110859	MPAT9	-0.3014	0.16	0.578808	38.453	47.7322
T261935	THCAT224	-0.2923	0.16	0.578808	3.3233	5.31716
T042008	KHCAT453	-0.3019	0.16	0.578808	16.0253	21.3951
T183565	LSCAT88	-0.3221	0.16	0.578808	1.55439	2.56435
T012410	CAT62.5	-0.29439	0.16	0.578808	13.2007	31.3004
T029620	MIR205HG.11	-0.2699	0.16	0.578808	1304.76	1972.45
T129477	CAT1834.2	-0.3126	0.16	0.578808	17.5787	26.6785
T324416	EGFR-AS1.1	0.27855	0.17	0.589815	8.90341	16.5235
T114379	CAT1721	0.2806	0.17	0.589815	15.7179	21.6192
T136494	CAT1873	-0.3061	0.17	0.589815	110.358	134.459
T082929	KCCAT699	0.2809	0.17	0.589815	70.8949	96.9275
T213658	CAT2143.1	-0.3111	0.17	0.589815	6.04212	11.7214
T272952	CAT596.1	0.2762	0.17	0.589815	50.7155	70.6774
T286846	MBAT95	-0.2445	0.17	0.589815	33.4113	44.8902
T233507	MEAT7	-0.2717	0.17	0.589815	4.7548	13.5172
T234183	CAT2250.1	-0.25589	0.17	0.589815	88.6342	177.387
T044429	KCCAT544	-0.2765	0.17	0.589815	9.03303	13.9678
T164836	CAT2035.1	0.27013	0.17	0.589815	10.2655	26.4348
T340488	CAT1013.1	-0.2693	0.17	0.589815	276.378	320.244
T190139	CAT246	-0.2525	0.17	0.589815	107.041	136.989
T203646	LSCAT169	-0.27607	0.17	0.589815	30.8116	149.035
T263735	CAT537	-0.28231	0.17	0.589815	74.7441	102.184
T107629	AMAT62	0.2509	0.17	0.589815	14.6205	19.2867
T263301	KCCAT459	-0.3006	0.17	0.589815	12.1423	33.484
T291255	HNCAT30.2	-0.3064	0.17	0.589815	34.5036	113.74
T048735	OVAT155	-0.2541	0.17	0.589815	4.94884	6.52636
T354897	CAT1129	-0.2546	0.17	0.589815	370.525	494.535
T050479	CAT1317.3	-0.2654	0.17	0.589815	42.6357	57.0102
T126429	LGAT114	-0.3176	0.17	0.589815	30.57	47.0335
T168498	CAT2064	-0.2746	0.17	0.589815	1593.22	2262.81
T252882	LACAT207	-0.3014	0.17	0.589815	5.25809	7.26264
T281807	CAT657.1	-0.2761	0.17	0.589815	12.1103	17.7088
T085945	LACAT199	-0.3016	0.17	0.589815	4.84311	8.6457
T257925	KHCAT93	0.2941	0.17	0.589815	8.10462	20.541
T310380	HNCAT153	0.2604	0.17	0.589815	7.33358	13.7089
T036720	LINC00707.2	0.2827	0.17	0.589815	92.1531	269.481
T258145	CAT501	-0.3277	0.17	0.589815	4.52322	11.6331
T296469	THCAT563	0.281	0.17	0.589815	20.2631	26.2452
T165021	MBAT56	-0.2703	0.17	0.589815	17.9196	28.262
T360544	CAT1154	-0.2513	0.17	0.589815	21.3685	29.0886
T275058	PNAT40	-0.2909	0.17	0.589815	2.17032	3.29915
T167572	RAB11B-AS1.1	-0.2954	0.17	0.589815	17.7777	25.8692
T003062	BRCAT354	-0.2546	0.17	0.589815	8.01734	9.42079
T048439	CAT1301	-0.2572	0.17	0.589815	92.8603	109.858
T247548	LINC00882.2	0.294	0.17	0.589815	4.62886	8.3211
T337685	KHCAT231	-0.2815	0.17	0.589815	3.45717	4.97461
T256976	THCAT65	-0.3038	0.17	0.589815	18.7323	44.8264
T166529	CAT2047	-0.27	0.17	0.589815	67.1709	87.3587
T147068	KCCAT176	-0.3043	0.17	0.589815	2.62124	4.60179
T094453	CAT1610.2	0.2491	0.17	0.589815	22.4124	37.8095
T144378	CAT1916	-0.2711	0.17	0.589815	305.407	404.289
T228428	CAT2220	-0.266	0.17	0.589815	219.844	279.57
T342987	KCCAT577	-0.2416	0.17	0.589815	97.9631	129.065
T212465	KCCAT368	-0.2972	0.17	0.589815	3.00708	5.47671
T316057	OVAT108	-0.2824	0.17	0.589815	3.79405	8.14367
T357426	AMAT134	-0.2711	0.17	0.589815	7.94307	11.2074
T104383	CAT1661	-0.2508	0.17	0.589815	48.4291	69.0715
T055857	CAT1343	-0.2873	0.17	0.589815	12.8247	39.7077
T224489	MIR155HG	-0.2918	0.17	0.589815	46.7368	116.978
T184394	CAT210	-0.2614	0.17	0.589815	168.115	249.001
T219472	ZFAS1.4	-0.2799	0.18	0.605344	155.158	234.659
T281624	KCCAT202	-0.2556	0.18	0.605344	36.0155	78.7851
T104538	KCCAT295	-0.2365	0.18	0.605344	49.5561	80.9081
T027857	CAT150	-0.2799	0.18	0.605344	23.6863	32.7371
T233871	CAT2248	-0.2772	0.18	0.605344	1026.43	1348.68
T157805	CAT1993	-0.2535	0.18	0.605344	11.1014	14.9318
T098079	DOCK9-AS2	-0.2781	0.18	0.605344	116.112	178.44
T318336	CAT899	-0.2566	0.18	0.605344	36.9589	52.1036
T365823	CAT1188	-0.2681	0.18	0.605344	73.1166	93.9295
T036018	LINC00702.1	0.2724	0.18	0.605344	6.86741	17.007
T234216	KCCAT160	-0.2763	0.18	0.605344	54.6162	66.0912
T262687	CAT532	0.2804	0.18	0.605344	20.4211	38.4121
T210833	PRCAT296	0.2706	0.18	0.605344	10.4152	22.7718
T080412	CAT1531	-0.3352	0.18	0.605344	5.21377	14.7514
T313718	PNAT120	-0.26918	0.18	0.605344	3.41681	10.4407
T188025	OVAT158	-0.2882	0.18	0.605344	5.60584	6.90532
T048719	CAT1304	-0.277	0.18	0.605344	15.1386	17.8469
T231158	CAT2230	-0.2553	0.18	0.605344	18.6374	29.6799
T218273	OSER1-AS1.1	-0.3012	0.18	0.605344	265.268	362.283
T347940	CAT1065.1	-0.2889	0.18	0.605344	8.17231	14.9066
T192039	DCTN1-AS1	0.2933	0.18	0.605344	4.02214	14.1027
T199191	KCCAT253	-0.2542	0.18	0.605344	6.45081	8.56365
T297390	CAT768	-0.2556	0.18	0.605344	9.89887	13.8842
T356846	KCCAT303	-0.253	0.18	0.605344	10.7856	17.6126
T076482	CAT1493	-0.2501	0.18	0.605344	141.139	220.276
T166625	KCCAT82.2	-0.2614	0.18	0.605344	28.8121	36.6943
T288508	CAT709	0.2416	0.18	0.605344	26.8863	42.6006
T243460	KHCAT11	-0.25877	0.18	0.605344	59.9527	86.2306
T190629	CAT251	-0.2474	0.18	0.605344	26.875	36.1844
T039445	GBAT14	-0.2475	0.18	0.605344	3.37354	4.81978
T168220	CAT2062	-0.2432	0.18	0.605344	1967.02	3800.1
T063059	CAT1387	0.26	0.18	0.605344	6.07883	10.6289
T340864	KCCAT146	0.24691	0.18	0.605344	1.83137	3.89597
T079593	HOXC-AS2.2	0.2546	0.18	0.605344	35.8285	60.0772
T344044	CAT1041.3	-0.3005	0.18	0.605344	1.73748	3.87422
T146738	OVAT113	-0.23712	0.18	0.605344	9.9018	13.2802
T226935	CAT2213.3	0.24927	0.18	0.605344	105.649	168.503
T128161	THCAT194	-0.2593	0.18	0.605344	11.1577	14.2976
T342975	LSCAT40.1	-0.291	0.18	0.605344	14.8801	26.6412
T206481	HNCAT98	0.2565	0.18	0.605344	2.88323	5.27094
T045545	CAT1285.2	-0.2785	0.18	0.605344	250.893	314.281
T320554	HOXA-AS2.1	0.24012	0.19	0.623117	20.6395	34.2734
T240984	CAT400.1	0.2545	0.19	0.623117	26.9394	53.3369
T205748	CAT353.2	0.2653	0.19	0.623117	5.46844	7.00818
T081839	AMAT133	-0.2708	0.19	0.623117	4.31803	6.02496
T315263	KCCAT240.2	0.272	0.19	0.623117	14.0835	23.2608
T268032	CAT573.1	-0.2625	0.19	0.623117	60.7056	110.065
T062931	CAT1385.1	-0.2666	0.19	0.623117	294.612	399.281
T127444	THCAT538	0.2713	0.19	0.623117	23.2994	32.3602
T040582	CAT1253	-0.3035	0.19	0.623117	86.6046	104.561
T054829	ZBED5-AS1.1	-0.2545	0.19	0.623117	412.049	522.86
T104735	CAT1666	-0.2423	0.19	0.623117	25.6069	45.1134
T039822	OVAT13	-0.2436	0.19	0.623117	16.0358	27.4753
T195352	CAT282	-0.2361	0.19	0.623117	93.8466	155.759
T307868	CAT838	-0.2376	0.19	0.623117	5.53952	8.43205
T307133	LVCAT66	0.29409	0.19	0.623117	8.34979	12.1433
T158045	LINC00667.2	-0.2511	0.19	0.623117	282.296	385.301
T099781	HRAT1	-0.3125	0.19	0.623117	42.8985	52.6219
T284430	LSCAT269	-0.2546	0.19	0.623117	10.1162	15.1197
T370219	THCAT413	-0.2698	0.19	0.623117	17.8166	28.7514
T236518	CAT2267	-0.2745	0.19	0.623117	186.439	649.144
T312843	BRCAT422	0.2668	0.19	0.623117	8.4978	14.9013
T225540	AMAT121	0.25419	0.19	0.623117	19.2087	29.6858
T231252	BRCAT216	-0.2589	0.19	0.623117	12.9842	18.6578
T156261	BAIAP2-AS1.2	0.2431	0.19	0.623117	692.704	821.314
T317112	CAT897	-0.2613	0.19	0.623117	4.25211	7.13262
T026504	KHCAT462	-0.2645	0.19	0.623117	50.1407	65.5332
T114431	THCAT140	-0.2576	0.19	0.623117	7.55474	15.3793
T337028	LSCAT2.1	-0.2548	0.19	0.623117	27.0648	38.9264
T184382	CAT209	-0.2712	0.19	0.623117	57.6925	82.0766
T165339	CAT2041.1	0.2429	0.19	0.623117	37.8075	66.5226
T085169	LACAT227	-0.2554	0.19	0.623117	7.02404	14.6922
T097941	HICLINC295	0.25204	0.19	0.623117	72.7966	118.179
T047765	HICLINC250	-0.2634	0.19	0.623117	5.63406	8.24515
T289937	HICLINC139	0.27509	0.19	0.623117	19.1923	42.4572
T327859	TP53TG1	-0.2907	0.2	0.633263	620.957	788.795
T203742	CRAT44	0.2656	0.2	0.633263	89.8632	150.567
T177475	AMAT9	-0.2403	0.2	0.633263	341.398	410.365
T013531	AMAT40	-0.24394	0.2	0.633263	111.684	137.416
T164137	LINC00909.2	0.2456	0.2	0.633263	175.549	195.897
T074283	CAT1475	-0.2463	0.2	0.633263	10.2654	16.5207
T216550	CAT2163	-0.3065	0.2	0.633263	60.3385	81.0308
T085537	CAT1564	-0.2254	0.2	0.633263	13.9916	19.0577
T139598	CAT1893	-0.242509	0.2	0.633263	175.059	206.276
T011686	CAT56	-0.2621	0.2	0.633263	60.8489	107.568
T330614	LINC01004.2	-0.2976	0.2	0.633263	9.69709	16.4463
T150108	BRCAT356	-0.2609	0.2	0.633263	7.0698	19.217
T292403	LACAT9	-0.2674	0.2	0.633263	35.2126	69.3521
T017588	KCCAT510	-0.2876	0.2	0.633263	6.28174	11.7746
T081965	KCCAT531	-0.2328	0.2	0.633263	50.6249	62.9807
T350592	FAM83A-AS1.2	0.2536	0.2	0.633263	109.013	264.952
T019326	THCAT556	-0.272	0.2	0.633263	2.76512	4.98497
T029611	MIR205HG.1	-0.2611	0.2	0.633263	77.0787	128.727
T282187	CAT662	-0.2342	0.2	0.633263	19.4828	24.1246
T297391	CAT769	-0.238	0.2	0.633263	8.71504	12.2142
T060417	CAT1366	-0.2392	0.2	0.633263	39.7156	88.4807
T198161	CAT303.2	-0.2584	0.2	0.633263	23.4585	30.5879
T143732	LSCAT225	-0.2983	0.2	0.633263	14.641	98.7753
T286118	KCCAT526	-0.2543	0.2	0.633263	45.1426	53.2419
T312881	CRAT2	0.2608	0.2	0.633263	169.523	209.713
T324407	CAT941.2	-0.2699	0.2	0.633263	112.585	185.88
T360304	PRCAT102.2	-0.2616	0.2	0.633263	3.9722	5.75762
T049520	CAT1309.1	-0.2397	0.2	0.633263	215.245	268.248
T365048	CAT1183	-0.2993	0.2	0.633263	27.0132	35.1666
T365863	HNCAT154	-0.2387	0.2	0.633263	18.8951	31.7376
T316808	KPCAT69	0.2496	0.2	0.633263	1.91447	4.60805
T072551	AMAT1	-0.2416	0.2	0.633263	80.3322	94.6898
T049891	LACAT140	-0.2601	0.2	0.633263	4.21586	6.03825
T127005	KCCAT560	-0.2329	0.2	0.633263	82.8087	99.3001
T191082	CAT260.1	-0.2738	0.2	0.633263	5.93537	15.0646
T177397	CAT2113.2	-0.2692	0.2	0.633263	104.824	134.729
T025071	LSCAT172.2	-0.293	0.2	0.633263	16.8755	22.5614
T343380	CAT1036	-0.2642	0.2	0.633263	34.3825	57.6179
T317967	LVCAT6	0.2746	0.2	0.633263	673.91	817.372
T008764	CAT39	-0.2746	0.2	0.633263	383.262	473.483
T216833	KCCAT147	-0.2482	0.2	0.633263	28.6952	40.4056
T287630	CAT704	-0.2856	0.2	0.633263	5.49728	13.3163
T059591	LSCAT196	-0.254	0.2	0.633263	6.86633	9.56612
T231415	MIAT.1	-0.2576	0.2	0.633263	28.9252	72.5108
T106203	THCAT498	0.2289	0.2	0.633263	2.25073	5.88838
T367411	CAT1204.6	-0.2446	0.2	0.633263	276.54	410.466
T139456	KCCAT63	-0.2269	0.2	0.633263	7.77108	14.1236
T004371	HNCAT96	0.2669	0.2	0.633263	3.1988	4.71258
T249653	CAT440	-0.2796	0.2	0.633263	87.5763	128.634
T061702	OVAT47	-0.265	0.21	0.648474	23.3624	30.1416
T129959	CAT1842.1	-0.2391	0.21	0.648474	276.288	331.338
T032282	CMAT33	-0.2505	0.21	0.648474	15.6587	19.2233
T376385	JPX.1	-0.2501	0.21	0.648474	84.2667	113.501
T082919	LGAT113	-0.2777	0.21	0.648474	38.7711	50.4011
T080852	LSCAT49.2	-0.2592	0.21	0.648474	11.921	15.9682
T080074	MEAT10	-0.2722	0.21	0.648474	1.81468	2.86635
T318849	CAT906	-0.2692	0.21	0.648474	52.1679	260.202
T136002	THCAT510	0.2287	0.21	0.648474	35.2014	47.426
T282591	CAT664.1	-0.2763	0.21	0.648474	32.8051	45.7214
T201872	PRCAT211	-0.2714	0.21	0.648474	18.0776	30.6671
T055027	LINC00958.5	-0.2567	0.21	0.648474	42.3022	71.7277
T032794	CAT186.2	-0.2582	0.21	0.648474	407.511	571.428
T000778	OVAT106.1	0.2318	0.21	0.648474	4.05732	5.62473
T020048	CAT109	0.264	0.21	0.648474	7.73885	20.0825
T084315	THCAT356	-0.2862	0.21	0.648474	5.59764	8.64503
T020995	CAT112.2	-0.2369	0.21	0.648474	1007.34	1211.41
T011933	CAT57.1	-0.2943	0.21	0.648474	76.0447	119.345
T293374	CAT745.3	-0.2428	0.21	0.648474	45.5752	71.5021
T016197	CAT84.2	0.2334	0.21	0.648474	2.11495	3.55358
T160599	CMAT55	0.2397	0.21	0.648474	43.7851	59.1282
T203093	LSCAT240	0.2418	0.21	0.648474	3.29643	5.98026
T297979	CAT774	-0.2703	0.21	0.648474	21.4516	33.5503
T089368	KCCAT9	0.252207	0.21	0.648474	27.3969	36.1981
T006985	CAT31.5	0.25251	0.21	0.648474	19.1524	52.7368
T197657	CAT299.1	0.2739	0.21	0.648474	5.16122	8.11007
T162916	THCAT619	0.2432	0.21	0.648474	8.71559	12.9537
T240653	AMAT5	-0.2345	0.21	0.648474	58.1203	76.7242
T214850	THCAT604	-0.2318	0.21	0.648474	13.4811	26.6932
T074212	LSCAT234	-0.2392	0.21	0.648474	8.99531	19.5793
T009120	KCCAT32	0.23522	0.21	0.648474	79.5329	108.952
T011500	GBAT38	0.29819	0.21	0.648474	32.6118	69.6346
T281074	CAT652	-0.2463	0.21	0.648474	421.394	532.796
T040305	CAT1250	0.2535	0.21	0.648474	7.98999	15.1665
T012415	CAT62.4	-0.2595	0.21	0.648474	37.3679	66.6976
T024481	HICLINC23	0.2558	0.21	0.648474	2.68214	3.98314
T159183	CAT2003.1	-0.2933	0.22	0.660735	9.21443	14.9558
T185669	KHCAT169.1	0.2837	0.22	0.660735	70.8064	153.886
T043562	UNC5B-AS1.2	-0.2657	0.22	0.660735	113.427	235.248
T282276	BRCAT199	-0.2535	0.22	0.660735	16.891	30.0059
T038491	CAT1242.2	-0.2582	0.22	0.660735	20.5303	30.8293
T287546	CAT702	-0.22886	0.22	0.660735	9.01864	14.8987
T141985	CAT1907	0.2322	0.22	0.660735	5.59814	15.3603
T165055	CAT2037.1	-0.2627	0.22	0.660735	9.29852	13.5356
T088556	KCCAT416	-0.2616	0.22	0.660735	32.5353	42.4233
T032330	CAT179	-0.2294	0.22	0.660735	242.979	391.72
T159636	GATA6-AS1.1	0.2324	0.22	0.660735	2.47478	6.87191
T304216	KCCAT83.1	0.2491	0.22	0.660735	19.9792	32.5674
T042844	JMJD1C-AS1	-0.2567	0.22	0.660735	20.8604	28.5645
T187398	AMAT122	-0.2478	0.22	0.660735	2.77397	3.99825
T081929	CAT1547	-0.238	0.22	0.660735	2812.91	5856.78
T309490	PRCAT259	-0.2737	0.22	0.660735	2.9839	11.4592
T066986	PRCAT220	-0.234	0.22	0.660735	13.3244	17.5152
T335044	KPCAT8	-0.248315	0.22	0.660735	1.58123	2.83511
T034582	CAT195.1	-0.2733	0.22	0.660735	37.984	51.4028
T367405	CAT1204.3	-0.262462	0.22	0.660735	91.4434	154.338
T030354	CAT164	-0.2457	0.22	0.660735	43.8976	56.8514
T330987	KHCAT187	-0.2141	0.22	0.660735	8.8318	12.4168
T160534	CAT2009.3	-0.2398	0.22	0.660735	12.1501	17.3528
T188298	KHCAT276	0.2408	0.22	0.660735	6.0775	51.8755
T248459	THCAT412	-0.2499	0.22	0.660735	2.74013	6.18592
T215474	CAT2152.2	-0.25631	0.22	0.660735	0.600842	49.5333
T201061	CAT318	-0.2649	0.22	0.660735	3.44619	9.40631
T355728	CAT1132	0.2353	0.22	0.660735	11.5335	23.6168
T203128	CAT333	-0.2895	0.22	0.660735	47.9155	74.6998
T373822	CAT2279.1	-0.2391	0.22	0.660735	408.725	785.862
T027825	CAT149.2	0.21948	0.22	0.660735	101.027	142.1
T318485	CAT903	0.2271	0.22	0.660735	95.9759	233.34
T281729	AMAT160	-0.2587	0.22	0.660735	2.71842	5.92418
T020194	HRAT4	-0.231	0.22	0.660735	13.8924	27.2193
T201450	CAT320.2	-0.2532	0.22	0.660735	34.8613	51.1339
T266977	CAT567	-0.2388	0.22	0.660735	32.3128	45.767
T077619	CAT1503.2	-0.259	0.22	0.660735	24.6524	33.6911
T305255	OVAT19	-0.247	0.22	0.660735	212.857	360.908
T139033	OVAT251	0.2344	0.22	0.660735	13.8966	19.3772
T073783	CAT1470	-0.2426	0.22	0.660735	3.24683	9.13752
T002708	CAT11.2	-0.2425	0.22	0.660735	110.034	148.857
T324413	KCCAT484	0.2379	0.23	0.674977	5.94367	12.87
T078794	CAT1518	-0.2403	0.23	0.674977	1457.08	4220.22
T072147	LGAT1	-0.2244	0.23	0.674977	5.92995	8.2691
T232833	HNCAT71.1	-0.2204	0.23	0.674977	80.7222	104.849
T121985	CAT1784	-0.2647	0.23	0.674977	217.535	334.216
T114595	CAT1724.2	-0.2631	0.23	0.674977	92.9437	123.863
T347860	KHCAT162	-0.2493	0.23	0.674977	5.27468	7.06235
T114826	MBAT83	-0.2347	0.23	0.674977	11.8995	21.552
T187399	CAT225	-0.2362	0.23	0.674977	4.77691	6.94307
T194835	KCCAT572	0.2251	0.23	0.674977	5.98841	13.3026
T011515	CAT54.1	0.22069	0.23	0.674977	123.389	164.968
T011238	CAT53.2	-0.2258	0.23	0.674977	120.307	213.808
T164479	CAT2033	-0.2384	0.23	0.674977	25.9394	34.5011
T297995	CAT775.3	-0.2351	0.23	0.674977	13.136	17.9593
T196637	CAT289.1	0.2403	0.23	0.674977	5.52	10.1343
T102913	CAT1652.1	0.2494	0.23	0.674977	10.6973	23.9603
T223669	OVAT8	-0.2524	0.23	0.674977	15.9503	22.9419
T337425	CAT1001	-0.23991	0.23	0.674977	198.535	240.201
T007374	KCCAT617	-0.2439	0.23	0.674977	94.6912	116.252
T281799	MBAT101	-0.2376	0.23	0.674977	236.139	359.129
T205750	CAT353.3	-0.2349	0.23	0.674977	911.05	1070.25
T081355	KCCAT196	-0.2269	0.23	0.674977	12.8795	15.0909
T274478	CAT604.1	0.2366	0.23	0.674977	11.5521	15.1822
T140639	MEAT109	-0.267	0.23	0.674977	18.5345	38.2048
T355241	THCAT290	-0.2505	0.23	0.674977	15.5556	35.7527
T215731	THCAT276	0.2452	0.23	0.674977	2.63727	5.0126
T065383	CAT1406.2	-0.244	0.23	0.674977	22.0356	32.734
T016778	OVAT148	-0.2441	0.23	0.674977	12.5006	20.0984
T127665	KHCAT39	-0.2499	0.23	0.674977	3.3966	4.3238
T261609	CAT519	-0.2464	0.23	0.674977	1.51438	18.5626
T358353	THCAT260	-0.256	0.23	0.674977	23.9719	104.249
T367347	BRCAT194	-0.2623	0.23	0.674977	1.77021	4.86437
T302079	CAT792	-0.24832	0.23	0.674977	67.2253	88.6892
T044793	CAT1282	-0.2212	0.23	0.674977	63.0328	86.5879
T018951	CAT103	-0.2586	0.23	0.674977	47.4485	58.6589
T301684	PRCAT30.1	0.2326	0.24	0.684648	385.726	479.134
T184453	CAT211.1	-0.2425	0.24	0.684648	18.9392	29.5514
T063374	CVAT16	0.2232	0.24	0.684648	713.379	857.111
T114881	CAT1729.1	0.2313	0.24	0.684648	62.7704	73.9498
T061554	CAT1375.2	0.2299	0.24	0.684648	50.4031	58.7909
T276755	CAT630.1	-0.237	0.24	0.684648	9.37241	12.3794
T217197	UTAT38	-0.2537	0.24	0.684648	116.249	145.413
T018833	CAT101.1	-0.2369	0.24	0.684648	8.02551	21.8601
T234182	CAT2250.2	-0.2366	0.24	0.684648	64.3684	129.525
T317645	KCCAT527	-0.2046	0.24	0.684648	7.64288	12.6756
T007150	CAT33	0.2203	0.24	0.684648	8.04433	26.7407
T307419	CAT833	-0.2414	0.24	0.684648	57.8728	67.7944
T076738	KHCAT445	-0.2264	0.24	0.684648	3.0422	7.30347
T364847	CAT1181	-0.2322	0.24	0.684648	42.0047	57.6485
T225628	LACAT122	-0.2468	0.24	0.684648	11.6398	915.982
T036218	CAT1219	-0.2255	0.24	0.684648	40.7309	111.279
T055823	BRCAT73.2	-0.2481	0.24	0.684648	15.5116	28.6419
T293351	CAT744.1	0.243	0.24	0.684648	12.445	23.265
T342039	CAT1023.1	0.2438	0.24	0.684648	83.3647	181.999
T366967	CAT1200	-0.2275	0.24	0.684648	28.4131	51.0298
T273306	CAT599	-0.2394	0.24	0.684648	43.4945	57.5159
T189180	AMAT91	-0.2319	0.24	0.684648	46.8835	57.2291
T257264	AMAT34	-0.2522	0.24	0.684648	21.0724	30.9112
T315256	KCCAT330	-0.2241	0.24	0.684648	6.06245	10.9096
T132673	CAT1854.2	0.221156	0.24	0.684648	69.8145	100.072
T282175	CAT661.2	-0.2149	0.24	0.684648	92.9796	135.327
T049892	CAT1314	-0.2284	0.24	0.684648	14.3276	23.523
T009282	CAT41	-0.2271	0.24	0.684648	8.79951	15.1725
T163304	LSCAT111	0.248	0.24	0.684648	6.74755	15.0825
T216756	BRCAT299	-0.2743	0.24	0.684648	6.66141	12.6627
T033088	CRAT47	-0.2219	0.24	0.684648	86.8307	127.12
T082899	CAT1552.2	-0.2336	0.24	0.684648	49.2878	68.3043
T307422	STCAT22	0.2208	0.24	0.684648	2.35654	17.4598
T219719	CAT2179.2	0.2243	0.24	0.684648	10.6351	18.9526
T004297	PRCAT293	0.2328	0.24	0.684648	74.6484	112.9
T226052	PRCAT128	-0.2487	0.24	0.684648	1.76337	4.80846
T140690	MIR497HG.2	-0.2302	0.24	0.684648	20.4893	27.1286
T305164	TRAM2-AS1.1	0.2124	0.24	0.684648	75.1776	101.436
T066453	CAT1418.2	-0.2433	0.24	0.684648	16.3531	30.5375
T261131	PRCAT286.1	-0.2547	0.24	0.684648	16.2672	25.5991
T309673	TRAF3IP2-AS1.2	-0.2348	0.24	0.684648	1.3336	13.1058
T360105	AMAT73	-0.2256	0.24	0.684648	42.6275	56.7088
T196995	CAT298	-0.2424	0.24	0.684648	23.2584	30.7259
T061111	CAT1372	-0.2367	0.24	0.684648	9.59335	19.4554
T019989	CAT107	-0.2232	0.25	0.687844	55.2912	70.8916
T324414	EGFR-AS1.3	0.2118	0.25	0.687844	16.7889	29.7667
T230009	KHCAT291	-0.2271	0.25	0.687844	21.1832	27.8069
T142346	CAT1908	0.2253	0.25	0.687844	53.0935	87.9833
T364157	CAT1176	-0.2281	0.25	0.687844	7.08564	48.2626
T251305	CAT455	-0.2429	0.25	0.687844	3.71114	8.13506
T206259	CAT355.1	0.2084	0.25	0.687844	3.59817	5.34444
T288899	KCCAT610	-0.228	0.25	0.687844	48.8022	62.9073
T061237	NEAT1	-0.2458	0.25	0.687844	6473.56	18885.1
T349016	CAT1080	-0.246	0.25	0.687844	27.3292	57.624
T189689	AMAT18	-0.2257	0.25	0.687844	15.8169	18.2503
T297413	CAT770.1	-0.225	0.25	0.687844	3.08964	5.0821
T265414	CAT551	0.2459	0.25	0.687844	5.47881	19.103
T314485	KCCAT75	-0.2466	0.25	0.687844	47.0237	82.9501
T043670	PRCAT183.2	-0.2343	0.25	0.687844	6.62552	11.9048
T297295	CAT767	-0.2399	0.25	0.687844	42.3881	62.2218
T284698	CAT679.1	-0.2594	0.25	0.687844	195.537	222.655
T039115	ESAT116.1	-0.2203	0.25	0.687844	229.135	300.796
T006588	OVAT16	-0.2401	0.25	0.687844	28.8051	48.8525
T171032	THCAT288.2	-0.2233	0.25	0.687844	10.704	15.5586
T070189	CAT1441.1	-0.2158	0.25	0.687844	32.1421	56.2051
T106832	KHCAT395.2	0.2342	0.25	0.687844	5.37249	11.6689
T118982	HNCAT182.4	-0.2382	0.25	0.687844	2.33588	19.2903
T330490	CAT963	-0.2269	0.25	0.687844	26.8478	60.183
T307037	CAT828.1	-0.2405	0.25	0.687844	9.21052	222.252
T346681	CAT1057	-0.22	0.25	0.687844	22.4506	35.1136
T071524	CAT1455	-0.20893	0.25	0.687844	15.8489	22.8009
T050959	LINC00959	-0.2174	0.25	0.687844	57.8158	81.4631
T117915	USP3-AS1.1	-0.20835	0.25	0.687844	35.3108	44.7837
T320359	HRAT26	-0.2094	0.25	0.687844	42.1339	70.2115
T011677	LVCAT38	-0.2243	0.25	0.687844	11.7757	23.8369
T050343	AMAT80	-0.2313	0.25	0.687844	32.9882	45.5302
T233755	CAT2247.2	-0.2509	0.25	0.687844	158.874	209.112
T249970	CAT445	-0.2332	0.25	0.687844	106.033	139.577
T196696	BRCAT17	-0.2225	0.25	0.687844	13.0162	19.499
T170428	CAT2077.2	-0.2307	0.25	0.687844	58.3492	73.2723
T344048	CAT1041.2	-0.2334	0.25	0.687844	0.116701	0.301194
T331223	MBAT104	-0.2359	0.25	0.687844	16.3377	17.6946
T045977	LINC00865.2	-0.2592	0.25	0.687844	10.7984	18.8952
T106678	KCCAT552	-0.2426	0.25	0.687844	9.7205	18.8931
T029708	CAT160.2	-0.2198	0.25	0.687844	3.94121	11.9334
T272860	MEAT130.2	-0.2535	0.25	0.687844	17.3872	23.0756
T153065	KCCAT325	-0.2193	0.25	0.687844	6.76648	12.011
T225330	CAT2203.2	-0.2078	0.25	0.687844	81.9137	95.1688
T328188	THCAT568	-0.2218	0.25	0.687844	11.1737	14.0114
T027822	CAT148	0.2183	0.25	0.687844	7.22323	22.5173
T272378	HHIP-AS1.1	-0.2643	0.25	0.687844	6.42658	25.992
T164426	CAT2032	-0.2228	0.25	0.687844	56.1901	74.7392
T016921	LACAT218	-0.2353	0.25	0.687844	4.88003	5.90685
T242352	CAT404	-0.2406	0.25	0.687844	23.6204	29.7452
T116657	LSCAT62	-0.2614	0.25	0.687844	19.1936	33.5169
T093502	CAT1601	-0.2431	0.25	0.687844	2.55351	3.59752
T321563	KCCAT404	-0.2251	0.25	0.687844	19.9894	28.6013
T174648	CAT2099	-0.22565	0.25	0.687844	18.2644	38.3441
T351869	THCAT1.1	0.2306	0.25	0.687844	7.31264	28.5242
T106140	THCAT572	0.2078	0.25	0.687844	3.22671	6.04376
T048756	HICLINC251.2	-0.2164	0.25	0.687844	22.3913	28.5697
T081837	HICLINC281	-0.2128	0.25	0.687844	54.1084	77.5755
T309376	CMAT40	0.2106	0.26	0.697421	40.303	70.5367
T117175	BRCAT283	-0.22422	0.26	0.697421	14.8711	18.9277
T145003	AMAT55	-0.2264	0.26	0.697421	21.9188	25.7859
T334872	CAT989	-0.2078	0.26	0.697421	300.783	382.316
T345417	OVAT36	-0.22147	0.26	0.697421	3.41322	4.43168
T309954	CAT855	-0.24025	0.26	0.697421	52.3333	77.4577
T163561	CAT2029.1	0.2303	0.26	0.697421	17.0382	39.2583
T327269	CAT946.1	-0.2539	0.26	0.697421	163.195	210.931
T239798	LSCAT276	0.2424	0.26	0.697421	23.3291	72.8013
T118026	AMAT119	-0.2024	0.26	0.697421	4.12336	5.9384
T158109	CAT1996	-0.2643	0.26	0.697421	3.73406	13.3744
T342972	LSCAT40.2	-0.2514	0.26	0.697421	5.79492	9.00623
T073684	CAT1468	-0.2321	0.26	0.697421	97.6226	189.907
T171030	THCAT615	-0.2392	0.26	0.697421	3.47313	6.81046
T142944	CAT1912	-0.2063	0.26	0.697421	20.413	31.4582
T159306	HNCAT218.2	-0.2489	0.26	0.697421	10.5225	36.1574
T002777	CAT13.1	-0.2147	0.26	0.697421	8.55852	11.5344
T059192	CAT1361.1	0.233	0.26	0.697421	25.1263	52.6262
T037630	CAT1233	-0.2095	0.26	0.697421	79.0807	228.322
T162728	LGAT112	-0.2533	0.26	0.697421	58.3147	67.998
T029617	MIR205HG.2	-0.2466	0.26	0.697421	320.482	544.305
T266581	CAT557	0.20636	0.26	0.697421	10.7915	18.9734
T031788	CAT175.1	-0.2249	0.26	0.697421	12.1792	15.1341
T076268	DDX11-AS1.1	-0.231	0.26	0.697421	48.8966	63.2727
T175718	LSCAT71	-0.2572	0.26	0.697421	49.6525	357.723
T087962	KPCAT72	-0.2398	0.26	0.697421	1.4873	2.82934
T341586	CAT1021	-0.2458	0.26	0.697421	42.206	103.231
T227447	KCCAT448	-0.22	0.26	0.697421	166.987	209.023
T129765	CAT1840.2	0.2251	0.26	0.697421	12.2318	25.104
T155705	KPCAT1	0.2235	0.26	0.697421	2.14322	5.73574
T305640	CAT818	-0.2191	0.26	0.697421	53.4997	71.4757
T135831	AMAT118.1	-0.2167	0.26	0.697421	10.4437	13.6155
T334988	THCAT393	-0.2271	0.26	0.697421	3.41795	4.96637
T261682	AMAT47	-0.2002	0.26	0.697421	34.6518	43.4101
T019181	CAT104	-0.20281	0.26	0.697421	244.482	336.129
T350191	SAMD12-AS1.1	0.2404	0.26	0.697421	5.63651	10.5054
T168610	CAT2065	0.2122	0.26	0.697421	6.70597	89.9903
T296827	LSCAT3.1	-0.2482	0.26	0.697421	101.016	169.334
T036343	CALML3-AS1.5	-0.2249	0.26	0.697421	5392.35	10762.4
T129438	HNCAT99	-0.2242	0.26	0.697421	171.537	187.924
T006958	OVAT126	-0.2459	0.26	0.697421	4.13017	6.01038
T104396	CAT1662	-0.2124	0.26	0.697421	4.97298	14.3299
T216095	CAT2154.1	0.2354	0.27	0.702438	10.8079	18.0885
T196783	MIR4435-1HG.2	0.2178	0.27	0.702438	29.6585	44.298
T081835	CAT1545	-0.2045	0.27	0.702438	40.965	50.4637
T316759	CAT896	0.2036	0.27	0.702438	258.753	388.006
T127418	MBAT97	-0.2199	0.27	0.702438	18.0735	21.1002
T359193	CAT1144.1	0.2266	0.27	0.702438	154.63	208.145
T304095	CAT804	0.22625	0.27	0.702438	43.2858	55.5363
T281893	BRCAT160	-0.2399	0.27	0.702438	3.24495	4.05241
T228930	LACAT91	-0.23181	0.27	0.702438	44.5376	53.0393
T033010	MEAT143	0.2102	0.27	0.702438	19.1426	31.6966
T312365	CAT870.2	-0.2152	0.27	0.702438	74.1769	94.9554
T117823	CAT1760.1	-0.214	0.27	0.702438	525.97	996.819
T239838	AMAT72	-0.2039	0.27	0.702438	13.1409	17.6078
T048563	CAT1302	-0.2164	0.27	0.702438	6.38586	11.6761
T098015	CAT1626	0.1925	0.27	0.702438	50.8372	148.092
T047481	CAT1295.1	-0.223	0.27	0.702438	37.6117	52.1282
T248567	MBAT60	-0.2292	0.27	0.702438	8.7545	13.9397
T232922	CAT2241.1	-0.208	0.27	0.702438	10.9654	25.9777
T107303	BRCAT274	0.2145	0.27	0.702438	4.30803	8.29407
T036232	CAT1221.2	-0.2372	0.27	0.702438	12.0555	124.394
T117356	THCAT301	-0.21	0.27	0.702438	18.1894	21.2895
T350149	OVAT14	-0.212	0.27	0.702438	11.9992	20.1903
T021363	CAT116.2	-0.233	0.27	0.702438	29.5973	50.6508
T030992	CAT171.2	-0.22576	0.27	0.702438	7.82929	32.9822
T159666	CAT2005.1	0.185	0.27	0.702438	26.5735	65.334
T166624	KCCAT139	-0.2192	0.27	0.702438	37.7288	51.3377
T304107	KCCAT53	-0.2054	0.27	0.702438	13.8764	22.3197
T014947	CAT76.1	-0.2147	0.27	0.702438	44.3015	87.5269
T090930	KCCAT353	0.21305	0.27	0.702438	101.93	139.5
T259865	KCCAT332	-0.231	0.27	0.702438	29.721	41.5344
T351405	CAT1100.2	0.20996	0.27	0.702438	274.112	315.777
T238349	CAT386.1	-0.236	0.27	0.702438	6.92978	41.0868
T320484	HOTAIRM1	-0.25437	0.27	0.702438	44.6115	69.0937
T113833	KCCAT470	-0.2145	0.27	0.702438	128.257	182.64
T130508	BRCAT126	-0.2355	0.27	0.702438	26.9639	37.0575
T036024	HNCAT133	0.2158	0.27	0.702438	2.07105	10.06
T272861	MEAT130.1	-0.2297	0.27	0.702438	6.11443	9.40718
T055030	LINC00958.6	-0.22665	0.27	0.702438	70.0601	97.5918
T078899	CAT1521.2	0.218	0.27	0.702438	24.1633	42.9155
T058954	CAT1357	-0.2213	0.27	0.702438	8.09689	14.5856
T017595	SLC16A1-AS1	-0.2491	0.27	0.702438	23.7312	28.239
T352024	CAT1106.2	-0.2443	0.27	0.702438	12.8655	39.2505
T098024	STK24-AS1	-0.2408	0.27	0.702438	24.6707	36.942
T056318	CAT1345.3	-0.2342	0.27	0.702438	48.3917	95.2799
T152410	THCAT157	-0.2079	0.27	0.702438	66.3519	103.007
T251581	HNCAT108	-0.2467	0.27	0.702438	5.87154	9.78759
T193353	THCAT343	0.2211	0.27	0.702438	13.6152	23.0904
T077617	CAT1504	-0.2307	0.27	0.702438	20.1181	33.1061
T046571	ENTPD1-AS1.5	-0.2247	0.27	0.702438	14.4299	21.3925
T062323	KCCAT508	-0.2452	0.27	0.702438	17.4534	34.9068
T351723	AMAT170	-0.236	0.27	0.702438	10.1407	13.6477
T151080	KCCAT400	0.21441	0.27	0.702438	90.4334	143.006
T055152	BRCAT314	-0.2194	0.28	0.711159	15.0884	25.8565
T196766	KCCAT87	0.2151	0.28	0.711159	7.68274	11.0422
T039355	CAT1246	-0.204	0.28	0.711159	19.7905	26.1494
T268005	KCCAT344	-0.2204	0.28	0.711159	1.83259	3.55019
T022591	CAT122	0.1938	0.28	0.711159	661.824	804.167
T093350	BRCAT416	0.2091	0.28	0.711159	13.0337	18.4323
T284138	CAT673.1	-0.21219	0.28	0.711159	24.8341	40.6675
T060502	KHCAT7	0.2102	0.28	0.711159	3.85544	7.63635
T104777	OVAT132	0.2027	0.28	0.711159	7.67245	11.9267
T153691	AMAT116	-0.2067	0.28	0.711159	5.93712	7.98061
T127197	LACAT201	-0.23632	0.28	0.711159	44.0691	70.3455
T294905	CAT753	-0.2196	0.28	0.711159	41.5245	54.4118
T325833	OVAT120	-0.2411	0.28	0.711159	4.14533	5.56499
T106281	KHCAT294	0.2203	0.28	0.711159	7.90997	630.636
T065452	CAT1408	-0.22264	0.28	0.711159	85.6579	142.189
T020857	GBAT2	-0.1873	0.28	0.711159	22.5949	28.2888
T141976	CAT1906	-0.216	0.28	0.711159	2.06157	3.2067
T354975	KCCAT352	-0.237	0.28	0.711159	39.7911	59.5885
T371951	CAT2276.2	-0.2312	0.28	0.711159	10.6943	20.6204
T175664	KHCAT243	0.217	0.28	0.711159	131.441	205.828
T208775	CAT372.1	-0.2313	0.28	0.711159	3.5364	6.16509
T127929	MEAT149	-0.228	0.28	0.711159	4.08592	11.3257
T081164	BRCAT363	-0.205	0.28	0.711159	60.1979	88.0109
T179653	KCCAT523	-0.2547	0.28	0.711159	1.56023	4.64984
T092712	STCAT14	-0.2104	0.28	0.711159	14.5095	34.4627
T113580	CAT1715	-0.216	0.28	0.711159	22.7625	29.3778
T147142	KCCAT553	-0.2185	0.28	0.711159	12.639	20.3237
T348028	MEAT96	0.2209	0.28	0.711159	1.71689	2.51507
T030563	LACAT138	-0.2668	0.28	0.711159	3.50493	10.554
T148887	KCCAT216	-0.2183	0.28	0.711159	50.9816	90.5083
T175844	CAT2105	-0.2225	0.28	0.711159	32.4354	50.5361
T337027	LSCAT2.2	-0.2541	0.28	0.711159	9.281	16.2106
T302546	CAT797	0.1986	0.28	0.711159	37.8213	46.3647
T074425	CAT1477.2	0.20355	0.28	0.711159	41.1595	56.6579
T265000	KCCAT590	-0.2065	0.28	0.711159	72.083	106.401
T058878	CAT1356	0.2189	0.28	0.711159	103.588	168.85
T161592	CMAT46	-0.2389	0.28	0.711159	2.53687	4.12691
T302927	AMAT76	-0.2283	0.28	0.711159	19.3937	24.9356
T151101	CAT1956.2	-0.212	0.28	0.711159	27.1079	38.7625
T285218	CAT684	0.2202	0.28	0.711159	8.9478	35.6456
T013953	CAT72	-0.2383	0.28	0.711159	51.2195	156.49
T296588	PRCAT13.1	-0.2011	0.28	0.711159	53.2149	93.6884
T275568	AMAT84	-0.2321	0.29	0.72347	23.6433	28.8361
T026197	CAT140	-0.2187	0.29	0.72347	16.2693	35.1852
T286149	CAT693	-0.2457	0.29	0.72347	32.023	52.3959
T121386	KCCAT569	-0.2156	0.29	0.72347	15.6352	27.6025
T033397	CAT190.1	-0.1951	0.29	0.72347	15.4878	21.4898
T020046	CAT108	0.223	0.29	0.72347	85.4789	143.66
T329531	OVAT54	-0.21895	0.29	0.72347	1.52942	2.16146
T211130	LSCAT179	-0.223	0.29	0.72347	5.82	9.9352
T293354	CAT744.2	-0.2388	0.29	0.72347	318.755	432.696
T343733	CAT1038	-0.2206	0.29	0.72347	62.7348	78.3148
T317387	PRCAT11.1	0.2233	0.29	0.72347	31.7429	97.0745
T307711	OVAT137	-0.2012	0.29	0.72347	4.39221	8.1225
T187653	CAT230	-0.2261	0.29	0.72347	34.8606	69.2192
T040184	KCCAT317	-0.2027	0.29	0.72347	3.82564	7.17126
T106460	CAT1682	0.2439	0.29	0.72347	2.95707	6.55985
T111765	KHCAT17	-0.219	0.29	0.72347	66.6978	88.0827
T189011	THCAT370	-0.22	0.29	0.72347	22.1286	26.7537
T113052	CAT1712	-0.21625	0.29	0.72347	12.2532	28.8863
T146110	KCCAT532	-0.2019	0.29	0.72347	56.9206	70.7662
T117795	BRCAT185.2	-0.2164	0.29	0.72347	9.81719	12.6987
T234486	AMAT20	-0.1857	0.29	0.72347	37.4617	48.5273
T029072	CAT158.2	-0.2236	0.29	0.72347	26.6821	193.965
T314379	CAT885.3	-0.1899	0.29	0.72347	95.4364	136.871
T104463	KCCAT434	-0.2106	0.29	0.72347	4.94585	9.83829
T119869	AMAT38	-0.2202	0.29	0.72347	25.1742	30.3505
T314883	CAHM	-0.1961	0.29	0.72347	16.2522	21.5106
T204840	LACAT135	0.2096	0.29	0.72347	2.41434	4.2382
T297988	AMAT114	-0.21967	0.29	0.72347	15.9224	19.8952
T351978	CAT1103.2	0.222	0.29	0.72347	10.758	19.1956
T262495	AMAT130	-0.1954	0.29	0.72347	8.52594	12.0989
T195054	KCCAT362.1	-0.2239	0.29	0.72347	6.49039	10.7659
T098226	HICLINC296.2	-0.217	0.29	0.72347	11.4628	14.2262
T362204	CAT1162	0.2187	0.3	0.730569	5.81585	55.8427
T263567	KCCAT429	-0.2294	0.3	0.730569	13.5091	53.9761
T153365	KCNJ2-AS1	-0.2107	0.3	0.730569	50.9598	79.6002
T313640	CAT881	0.2185	0.3	0.730569	81.0758	101.229
T295238	LINC00847.1	0.2136	0.3	0.730569	284.896	401.397
T330861	CAT965	-0.2138	0.3	0.730569	44.8212	73.8721
T297166	CAT766.1	-0.2002	0.3	0.730569	22.4887	29.2859
T181772	ZNF667-AS1.4	-0.21695	0.3	0.730569	37.8822	232.396
T162025	KHCAT34.1	-0.2234	0.3	0.730569	19.0306	24.5585
T268031	CAT573.2	-0.2157	0.3	0.730569	21.2554	36.2573
T206053	KHCAT421	0.2073	0.3	0.730569	28.1723	38.6235
T231743	LSCAT26	-0.233	0.3	0.730569	12.4051	25.032
T359953	CAT1147.3	-0.19462	0.3	0.730569	41.2032	66.9105
T372052	PHKA2-AS1.3	-0.2038	0.3	0.730569	2.93384	4.72841
T100139	CAT1637	-0.228	0.3	0.730569	3.82126	13.4096
T346866	MEAT136	-0.2043	0.3	0.730569	10.2061	14.7461
T232198	TUG1.2	0.1897	0.3	0.730569	91.0879	152.419
T156740	MAFG-AS1.1	-0.2143	0.3	0.730569	743.451	907.215
T081209	CAT1534.2	0.2141	0.3	0.730569	13.5563	33.1967
T027892	MBAT113	-0.19909	0.3	0.730569	115.332	162.305
T090882	CAT1583	0.2064	0.3	0.730569	44.8813	79.7456
T254728	MEAT100	0.1986	0.3	0.730569	21.5795	37.6627
T092588	KCCAT432	-0.2262	0.3	0.730569	7.82338	14.9798
T346505	CAT1056	-0.1951	0.3	0.730569	111.381	181.76
T006282	BRCAT233	0.1912	0.3	0.730569	19.0597	86.161
T343001	KCCAT583	-0.1965	0.3	0.730569	66.6392	89.2113
T107161	CAT1688.2	0.1964	0.3	0.730569	233.665	296.183
T254694	CAT473	-0.2394	0.3	0.730569	416.456	850.407
T354959	THCAT387	-0.2491	0.3	0.730569	6.9524	11.355
T096180	LSCAT16.7	0.2038	0.3	0.730569	29.7513	338.423
T154078	KCCAT315	-0.2003	0.3	0.730569	119.911	174.419
T171865	PNAT108	-0.2275	0.3	0.730569	18.7447	31.8209
T075824	OVAT60	-0.1985	0.3	0.730569	20.732	30.7496
T056840	CSTF3-AS1	-0.2091	0.3	0.730569	7.95063	10.9379
T330239	KCCAT375	-0.1969	0.3	0.730569	15.6312	18.9205
T203380	CAT337.2	0.2313	0.3	0.730569	49.5709	96.9845
T066397	KCCAT234	0.2073	0.3	0.730569	11.1691	30.6255
T068507	THCAT545	-0.22544	0.3	0.730569	49.8227	63.5473
T326472	GBAT6	-0.1978	0.3	0.730569	2.19254	4.17495
T342923	CAT1033	-0.19508	0.3	0.730569	50.4597	70.1286
T074191	THCAT437	-0.1952	0.3	0.730569	85.0929	127.354
T259285	KPCAT2.2	0.1992	0.3	0.730569	33.7319	120.483
T354539	ZNF252P-AS1	-0.2227	0.3	0.730569	1.90906	2.83163
T126437	PRCAT297	-0.2447	0.3	0.730569	17.359	37.8258
T074554	CAT1479	-0.199	0.31	0.732298	7.26751	14.3292
T172132	LINC00662.1	-0.2087	0.31	0.732298	53.928	76.0078
T010930	CAT50	0.17962	0.31	0.732298	5.66819	11.6764
T322753	KCCAT512	0.1874	0.31	0.732298	154.85	215.129
T174315	LINC00665.3	0.1961	0.31	0.732298	21.1148	60.0238
T189061	BCYRN1	0.1942	0.31	0.732298	2.65831	17.9355
T228009	KCCAT638	0.2226	0.31	0.732298	4.54345	8.69582
T305655	THCAT543	0.2006	0.31	0.732298	17.952	28.9714
T068511	THCAT410	-0.1982	0.31	0.732298	40.2624	47.8387
T225512	CAT2206.1	0.1992	0.31	0.732298	3.91539	15.938
T095243	CAT1618	0.2033	0.31	0.732298	4.44077	6.22247
T078885	CAT1520.1	0.1944	0.31	0.732298	229.197	592.601
T079685	THCAT403	-0.2345	0.31	0.732298	23.4159	33.323
T270264	SNHG8.1	-0.21	0.31	0.732298	195.609	369.312
T231744	LSCAT35	-0.2276	0.31	0.732298	14.8461	25.4517
T333020	THCAT59.1	-0.2241	0.31	0.732298	23.244	40.6694
T072489	CAT1465.2	0.1882	0.31	0.732298	5.59755	8.19886
T011230	CAT52	-0.2092	0.31	0.732298	188.229	230.63
T074432	CAT1477.1	0.1861	0.31	0.732298	9.81204	13.9847
T144460	CAT1917.1	-0.1941	0.31	0.732298	103.015	156.111
T048718	CAT1303	-0.1946	0.31	0.732298	22.762	28.3441
T188979	BRCAT210	-0.2088	0.31	0.732298	7.90846	11.0443
T170306	KHCAT148	0.1908	0.31	0.732298	254.507	347.432
T328343	KHCAT66	-0.1958	0.31	0.732298	7.16545	10.5045
T297999	THCAT100	-0.1942	0.31	0.732298	1.69068	3.69779
T218271	OSER1-AS1.3	0.1982	0.31	0.732298	120.578	149.936
T148265	BRCAT375	-0.2115	0.31	0.732298	4.64839	9.11587
T200420	CAT315	-0.2017	0.31	0.732298	4.26068	7.92205
T288823	CAT713	-0.2139	0.31	0.732298	194.584	285.318
T054677	SBF2-AS1.3	-0.2229	0.31	0.732298	7.71355	21.8737
T054676	SBF2-AS1.4	-0.213	0.31	0.732298	63.3513	82.7338
T019695	AMAT83	0.1923	0.31	0.732298	54.7678	88.657
T232633	CAT2240	0.1986	0.31	0.732298	6.12206	12.978
T255789	KHCAT302	0.212	0.31	0.732298	25.0249	41.1391
T031279	CAT174	-0.2334	0.31	0.732298	7.58383	16.1373
T258687	CAT504	-0.1775	0.31	0.732298	69.978	90.9176
T213646	CAT2142.3	-0.2424	0.31	0.732298	12.1723	28.6407
T257508	CAT495.3	0.2014	0.31	0.732298	15.9737	30.7101
T342875	KCCAT620	-0.179464	0.31	0.732298	117.038	176.861
T255857	CAT481	-0.2052	0.31	0.732298	58.5205	74.3549
T149935	KHCAT426	-0.1944	0.31	0.732298	83.6799	92.6091
T127212	CAT1816	-0.2247	0.31	0.732298	810.455	991.518
T203103	CAT330	-0.2211	0.31	0.732298	37.4359	63.4983
T203345	KCCAT481	0.2208	0.31	0.732298	7.17407	11.1578
T162756	CAT2022	-0.1984	0.31	0.732298	52.5773	72.4133
T036641	KHCAT433	0.2042	0.31	0.732298	71.4037	107.421
T300934	HCP5.2	-0.2026	0.31	0.732298	2139.31	3138.1
T169171	CAT2069.2	0.2187	0.31	0.732298	1911.37	2555.34
T231417	KCCAT296	-0.202	0.31	0.732298	48.0967	116.198
T335016	OR2A1-AS1.2	-0.224	0.31	0.732298	2.99181	5.6065
T322086	AMAT74	-0.2031	0.31	0.732298	145.572	190.832
T096171	LSCAT16.5	0.1815	0.31	0.732298	9.2453	44.464
T345303	AMAT120	0.1845	0.31	0.732298	1.96591	2.61108
T094824	CAT1616.1	0.1866	0.31	0.732298	43.2867	70.2387
T122676	CAT1789.3	-0.1933	0.31	0.732298	3.5199	5.88671
T190747	CAT253.3	-0.2046	0.31	0.732298	190.709	269.549
T341139	HICLINC185.1	-0.1968	0.31	0.732298	146.627	194.139
T345416	OVAT34	-0.19956	0.32	0.738449	4.49699	6.70626
T050475	CAT1317.1	-0.1875	0.32	0.738449	47.5744	61.4376
T232291	KHCAT160	-0.22036	0.32	0.738449	31.7841	42.3487
T176835	CAT2109	-0.1879	0.32	0.738449	21.2242	36.974
T117615	CAT1759.2	0.1947	0.32	0.738449	5.06055	15.1516
T234728	CAT2255	-0.1881	0.32	0.738449	157.703	204.618
T139868	PRCAT284	-0.2131	0.32	0.738449	5.04897	9.39133
T272852	CAT595	-0.20198	0.32	0.738449	29.6384	40.3322
T239000	SGOL1-AS1	0.1883	0.32	0.738449	29.3674	42.3066
T231741	LSCAT12	-0.21	0.32	0.738449	18.127	37.7582
T201643	LSCAT63	-0.2083	0.32	0.738449	10.524	25.493
T302165	CAT793.1	0.1767	0.32	0.738449	1743.02	2229.78
T120415	CAT1775.1	-0.1881	0.32	0.738449	7.14639	30.1224
T186375	ESAT111	0.1816	0.32	0.738449	169.821	212.083
T337258	AMAT27	0.208	0.32	0.738449	28.7214	40.3744
T214688	ESAT110.2	0.2055	0.32	0.738449	74.0334	100.067
T214687	ESAT110.1	0.2055	0.32	0.738449	74.0334	100.067
T333265	MESTIT1	0.192	0.32	0.738449	11.7817	17.3376
T103984	KHCAT459	0.2138	0.32	0.738449	61.6864	90.1767
T184523	CAT213	-0.219	0.32	0.738449	14.9656	28.4325
T155633	HNCAT51.1	0.2123	0.32	0.738449	4.46192	12.4465
T116764	LSCAT151	-0.2181	0.32	0.738449	29.4633	44.4594
T342624	KCCAT77	-0.1947	0.32	0.738449	58.5568	348.814
T284899	CAT682.2	-0.18606	0.32	0.738449	461.773	557.524
T087988	HNCAT32	-0.2017	0.32	0.738449	7.51933	10.7373
T175034	HNCAT112	-0.1916	0.32	0.738449	12.7869	35.9136
T036706	PRKCQ-AS1.4	-0.2122	0.32	0.738449	191.405	238.103
T208524	THCAT416	-0.1983	0.32	0.738449	33.1655	67.5895
T161970	CAT2016	-0.2048	0.32	0.738449	3.39227	4.79718
T003797	KCCAT329	-0.183	0.32	0.738449	105.819	129.81
T056308	CAT1345.2	-0.2175	0.32	0.738449	8.26168	27.2351
T305644	THCAT273	0.1781	0.32	0.738449	49.1829	56.2352
T008728	CAT38	-0.2076	0.32	0.738449	8.71267	16.8347
T019757	CAT106	0.2274	0.32	0.738449	10.865	20.2919
T146739	OVAT247	0.1963	0.32	0.738449	96.2077	105.197
T205207	CAT349	-0.1861	0.32	0.738449	8.29223	24.5514
T096168	LSCAT16.8	0.2009	0.32	0.738449	20.7753	61.0536
T048147	CAT1300	-0.1996	0.32	0.738449	246.918	371.314
T190093	CAT245	-0.2261	0.32	0.738449	9.60829	18.9548
T211129	LSCAT45	-0.2261	0.32	0.738449	11.1576	17.7188
T367410	CAT1204.5	-0.2117	0.32	0.738449	225.816	393.738
T121973	KCCAT600	-0.1991	0.32	0.738449	12.2831	18.4405
T363020	PRCAT200	-0.2	0.32	0.738449	14.2257	44.1095
T029335	KHCAT4	-0.1977	0.32	0.738449	6.07292	26.3808
T326331	LINC00035	-0.2132	0.32	0.738449	21.8234	121.71
T148768	CAT1940	0.2054	0.33	0.746195	16.4075	25.172
T128246	MEAT101.1	0.2019	0.33	0.746195	4.6459	20.4751
T196789	CAT295.1	0.1833	0.33	0.746195	81.7591	128.31
T303584	CAT801	-0.1874	0.33	0.746195	51.4011	74.2531
T062935	CAT1385.2	-0.2046	0.33	0.746195	1003.04	1364.49
T015854	DPYD-AS1.3	0.1714	0.33	0.746195	34.7766	48.0261
T201649	LSCAT137	-0.239	0.33	0.746195	2.43173	7.01108
T075893	CAT1491	-0.18825	0.33	0.746195	93.1743	100.713
T314150	AMAT16	-0.1916	0.33	0.746195	39.7384	54.0693
T256578	LVCAT71	-0.1989	0.33	0.746195	7.45319	17.3028
T306342	CAT822	0.1848	0.33	0.746195	22.1225	81.7202
T281107	MBAT112	-0.193	0.33	0.746195	165.705	244.995
T290066	ESAT17	-0.1888	0.33	0.746195	56.6673	63.442
T215165	PRCAT229	-0.199	0.33	0.746195	6.61138	47.7425
T203379	CAT337.1	0.2015	0.33	0.746195	20.9629	46.726
T214764	CAT2148	0.1856	0.33	0.746195	32.652	62.1173
T202909	CAT327	-0.2098	0.33	0.746195	340.388	435.148
T321579	KHCAT358	-0.1781	0.33	0.746195	3.96831	5.34471
T211903	BRCAT33	-0.2145	0.33	0.746195	36.5704	196.223
T375351	CAT2284	-0.1883	0.33	0.746195	45.865	53.832
T223627	CAT2191.1	-0.1998	0.33	0.746195	5.34073	21.4987
T177653	CAT2115	0.2004	0.33	0.746195	2.42735	12.2227
T358875	MEAT1.1	0.2078	0.33	0.746195	2.38338	3.97927
T166626	KCCAT82.1	-0.191	0.33	0.746195	48.0214	65.9141
T049518	CAT1309.2	-0.202763	0.33	0.746195	66.8448	88.3998
T064023	CAT1394	-0.1822	0.33	0.746195	134.738	164.543
T045975	LINC00865.1	-0.1809	0.33	0.746195	73.7437	130.746
T337275	KCCAT340	-0.2267	0.33	0.746195	13.7505	34.7384
T322061	LINC00265.3	-0.1788	0.33	0.746195	172.037	205.899
T350528	CAT1092	-0.2095	0.33	0.746195	14.2941	21.2934
T092450	TEX26-AS1.4	0.2209	0.33	0.746195	3.83974	13.2241
T235217	CAT2258.4	-0.2102	0.33	0.746195	2.97142	5.31136
T257075	KHCAT233	0.1908	0.33	0.746195	121.817	225.394
T039526	KCCAT486	-0.1777	0.33	0.746195	21.2001	26.4288
T201796	CAT322	-0.2159	0.33	0.746195	27.8942	43.6219
T304646	BRCAT408	0.17608	0.33	0.746195	28.8177	60.7318
T321738	ELMO1-AS1	-0.2019	0.33	0.746195	6.27468	8.30686
T182231	CAT2135	-0.1891	0.33	0.746195	6.56453	12.1063
T273666	KHCAT18	-0.189669	0.33	0.746195	30.555	45.2015
T380237	RAP2C-AS1	-0.2103	0.33	0.746195	97.0873	118.46
T021357	CAT114.1	-0.1826	0.34	0.754753	165.721	225.081
T275816	CAT623.1	-0.2338	0.34	0.754753	2.05163	7.46982
T102562	OVAT89	-0.1892	0.34	0.754753	8.24488	11.4725
T296587	PRCAT13.2	-0.1967	0.34	0.754753	33.126	67.1362
T109603	DICER1-AS1	-0.19194	0.34	0.754753	219.048	298.042
T272838	CAT594.2	-0.19419	0.34	0.754753	6.02694	9.27888
T018595	CAT99.1	-0.178	0.34	0.754753	413.343	511.448
T132766	CRNDE.1	0.1753	0.34	0.754753	874.517	1240.13
T307019	KCCAT206	-0.1925	0.34	0.754753	6.48582	11.4816
T124525	CAT1798.1	-0.1989	0.34	0.754753	2.32586	3.55409
T075537	KHCAT435	-0.2087	0.34	0.754753	3.81812	6.76418
T244590	CAT416.5	0.19513	0.34	0.754753	3.45323	7.98984
[truncated: 2,494 more rows]

## Sheet: COAD
Transcript ID	Name	Cox coefficient	Raw p-value	BH-adjusted p-value	Median Expression	Mean Expression	Cox model: coxph(Surv(times,died) ~ lncrna + sex + age)
T205207	CAT349	-0.8784	0.00058	0.987196	3.48188	5.89207
T031011	CAT170.1	0.6765	0.0019	0.987196	3.94958	104.488
T046673	CAT1291	-0.6692	0.0021	0.987196	6.92819	13.8393
T241165	CAT401.1	-0.6441	0.0031	0.987196	37.1693	51.219
T165230	CAT2039.2	-0.689	0.0042	0.987196	7.79002	11.7832
T268032	CAT573.1	-0.6531	0.0044	0.987196	118.603	173.899
T346505	CAT1056	-0.6185	0.0045	0.987196	20.8049	48.4238
T109782	CAT1697	-0.8131	0.0046	0.987196	1.57442	3.72836
T350239	MEAT150	-0.717	0.006	0.987196	2.22793	4.01852
T201449	CAT320.1	-0.5932	0.0061	0.987196	9.24878	14.3681
T104333	LINC00519	-0.6874	0.0062	0.987196	2.10458	3.13947
T141801	CAT1905	-0.737	0.0065	0.987196	1.98397	3.26755
T364547	KHCAT138.1	0.5326	0.0066	0.987196	7.23919	13.0788
T061111	CAT1372	-0.6673	0.0066	0.987196	5.38164	9.67171
T341428	KHCAT270	-0.6773	0.0077	0.987196	12.1752	17.4163
T058878	CAT1356	-0.5876	0.0083	0.987196	175.414	268.051
T040715	CAT1254	-0.5704	0.0085	0.987196	17.7521	25.806
T086560	CAT1570	-0.5953	0.0085	0.987196	8.04514	13.351
T290659	CAT728	-0.6462	0.0088	0.987196	2.4061	4.73586
T195198	AMAT4	-0.574	0.01	0.987196	17.9105	28.5175
T345055	CAT1051.3	-0.5566	0.01	0.987196	13.7003	21.0159
T025160	DNM3OS.1	-0.6043	0.011	0.987196	15.022	24.6822
T074554	CAT1479	-0.5435	0.012	0.987196	6.54198	10.3933
T275278	CAT613.2	-0.5621	0.012	0.987196	16.7899	22.7912
T180972	KCCAT376	-0.6319	0.012	0.987196	1.45683	2.2793
T211903	BRCAT33	-0.4833	0.013	0.987196	165.133	306.891
T151696	HICLINC347	-0.5558	0.013	0.987196	5.15199	8.14419
T320528	HOXA-AS2.2	-0.6625	0.014	0.987196	9.28754	15.9011
T108903	THCAT530	-0.6494	0.015	0.987196	4.44111	7.90981
T320411	CAT915.3	-0.5149	0.016	0.987196	5.01609	7.70799
T049520	CAT1309.1	-0.5268	0.016	0.987196	53.4724	80.6683
T056318	CAT1345.3	0.4986	0.016	0.987196	13.6994	21.9694
T075756	LSCAT43	-0.5066	0.016	0.987196	11.7514	20.6223
T342469	CAT1027	-0.5479	0.016	0.987196	105.44	145.268
T350375	HAS2-AS1	-0.571	0.017	0.987196	12.7734	40.3144
T285247	KHCAT339.2	-0.5584	0.017	0.987196	3.36574	4.40148
T080255	MBAT89	-0.5772	0.017	0.987196	20.3022	28.4915
T038056	MBAT92	-0.5057	0.018	0.987196	43.2732	76.2091
T360304	PRCAT102.2	-0.6093	0.018	0.987196	1.73619	3.03942
T071524	CAT1455	-0.5258	0.019	0.987196	4.76719	9.18143
T014433	BRCAT415	-0.5785	0.019	0.987196	2.63056	4.58603
T163181	AMAT123	-0.5497	0.021	0.987196	2.40914	4.38261
T117110	CAT1750	-0.5291	0.021	0.987196	285.033	445.447
T069226	MBAT64	-0.5496	0.022	0.987196	14.8142	28.2771
T318439	THCAT281	-0.5309	0.022	0.987196	2.3986	5.42037
T098325	FGF14-IT1	-0.514	0.023	0.987196	3.91737	7.57508
T344192	CAT1045	-0.5162	0.023	0.987196	4.02813	5.2866
T193444	LINC00152.1	-0.5051	0.024	0.987196	11.4989	18.7902
T152329	CAT1965	-0.5492	0.024	0.987196	2.32743	4.36033
T244875	CAT420	-0.5572	0.024	0.987196	1.3262	2.42411
T272818	CAT592	-0.478	0.025	0.987196	14.0375	27.2199
T149369	CAT1942	-0.5289	0.025	0.987196	2.43183	5.12327
T073832	CAT1472.2	-0.5083	0.026	0.987196	22.686	55.7766
T096017	HICLINC290.1	-0.4834	0.026	0.987196	28.7412	79.3161
T083661	HICLINC283.8	-0.5007	0.027	0.987196	3.68139	9.78774
T287546	CAT702	-0.5433	0.028	0.987196	1.64513	2.74265
T317112	CAT897	-0.5076	0.028	0.987196	4.16501	9.06814
T349016	CAT1080	-0.4176	0.029	0.987196	8.94807	13.813
T027468	KCCAT312	-0.4921	0.029	0.987196	5.23982	9.03764
T264435	CAT543	-0.5025	0.029	0.987196	12.5421	19.1063
T040305	CAT1250	-0.448	0.029	0.987196	5.22316	8.41197
T026197	CAT140	-0.5031	0.03	0.987196	4.24739	7.5636
T014432	BRCAT392	-0.5035	0.03	0.987196	3.36574	5.78508
T196170	KCCAT680.1	-0.47	0.031	0.987196	4.02015	6.19384
T153059	CAT1968.1	-0.4791	0.031	0.987196	3.32509	6.66213
T178141	CAT2120	-0.4876	0.031	0.987196	51.4606	64.8121
T054686	SBF2-AS1.5	-0.4595	0.031	0.987196	37.6043	52.1687
T291825	THCAT523	-0.4441	0.032	0.987196	4.47292	8.63905
T361838	BRCAT11	0.4428	0.032	0.987196	2.66482	4.48901
T285215	VCAN-AS1	-0.4439	0.032	0.987196	82.9765	120.047
T355398	AMAT108	-0.4655	0.032	0.987196	3.31249	4.7872
T093640	CAT1604.2	-0.5179	0.033	0.987196	2.43183	4.76492
T019181	CAT104	-0.4094	0.033	0.987196	54.587	91.47
T205783	THCAT319	-0.5227	0.034	0.987196	40.3949	112.563
T031018	CAT171.1	-0.4926	0.034	0.987196	4.24798	10.559
T339244	CAT1007.2	-0.453	0.035	0.987196	104.884	152.851
T117111	CAT1751	-0.476	0.035	0.987196	536.869	821.258
T301681	PRCAT113	-0.512	0.036	0.987196	2.05466	4.29644
T152697	CRAT9	-0.4311	0.036	0.987196	14.6063	30.9106
T201771	CAT321	-0.4465	0.036	0.987196	75.6756	97.4114
T015848	DPYD-AS1.1	-0.5123	0.038	0.987196	2.37828	4.34996
T151540	LACAT210	-0.4664	0.039	0.987196	11.1525	16.2874
T193353	THCAT343	-0.4547	0.039	0.987196	6.10078	12.8985
T275568	AMAT84	-0.412	0.04	0.987196	9.97346	12.9313
T075637	CAT1485	-0.4414	0.041	0.987196	65.8257	87.443
T129953	CAT1841.2	0.4449	0.041	0.987196	101.459	127.234
T269691	KHCAT185	-0.414	0.042	0.987196	6.86451	10.8999
T312316	CAT868	-0.4835	0.042	0.987196	13.7177	22.4758
T191617	CAT262	-0.4578	0.042	0.987196	2.28662	3.81777
T188120	SLC8A1-AS1.2	-0.418	0.043	0.987196	8.22951	10.4635
T241242	LVCAT21	-0.4567	0.043	0.987196	3.64277	5.63398
T143792	KHCAT120	-0.4202	0.043	0.987196	18.6136	31.303
T174016	MBAT94	-0.4612	0.043	0.987196	13.3707	19.898
T048069	MBAT85	-0.524	0.043	0.987196	9.31225	20.9978
T346493	KCCAT199	-0.3783	0.044	0.987196	75.377	150.593
T034236	KPCAT21	-0.4508	0.044	0.987196	24.5723	53.5947
T239530	BRCAT306	-0.445	0.044	0.987196	4.2048	6.40941
T236072	CAT2265	-0.482	0.045	0.987196	2.50227	5.41071
T052266	MIR210HG.1	0.4257	0.045	0.987196	111.839	138.234
T259327	CTBP1-AS2.1	-0.4562	0.045	0.987196	83.0212	128.78
T272801	CAT591	-0.4276	0.045	0.987196	10.6519	23.749
T292950	CAT741	-0.5103	0.046	0.987196	1.64445	2.801
T109935	CAT1699	-0.4546	0.046	0.987196	4.43935	7.46731
T162081	CAT2017	-0.4074	0.046	0.987196	13.8609	22.5838
T132564	CAT1853	-0.4695	0.047	0.987196	136.255	173.681
T215042	LINC00261	-0.436	0.048	0.987196	87.3124	302.711
T228930	LACAT91	-0.4307	0.048	0.987196	22.738	33.4675
T312067	CAT867	-0.3984	0.048	0.987196	17.2308	23.6258
T348705	CAT1073.2	-0.4353	0.048	0.987196	11.3991	18.7091
T109441	LVCAT75	-0.432	0.048	0.987196	4.47292	7.6308
T031097	CAT172	-0.4201	0.049	0.987196	20.1997	28.3736
T332197	BRCAT235	-0.4462	0.049	0.987196	9.9021	27.0606
T290794	KCCAT140	-0.4204	0.049	0.987196	5.32997	10.0241
T324414	EGFR-AS1.3	0.425	0.05	0.987196	6.36414	14.4821
T107161	CAT1688.2	-0.3971	0.05	0.987196	107.833	126.865
T320576	LSCAT58	-0.4645	0.05	0.987196	28.3717	101.002
T163561	CAT2029.1	-0.3774	0.051	0.987196	4.73143	6.40413
T116384	CAT1742	-0.4818	0.051	0.987196	1.95578	2.89945
T092309	LINC00365	-0.4615	0.051	0.987196	7.69078	16.813
T094733	LINC00371.2	0.4293	0.051	0.987196	5.15834	23.0349
T339368	THCAT574	-0.4359	0.051	0.987196	6.1338	15.0405
T042584	MEAT142	-0.4489	0.052	0.987196	5.26111	8.76889
T073758	BRCAT421	-0.4772	0.053	0.987196	1.45683	3.04388
T314152	AMAT113	-0.476	0.053	0.987196	2.14298	4.67948
T258687	CAT504	0.4224	0.053	0.987196	18.9336	26.7555
T216209	MBAT77	-0.5191	0.053	0.987196	2.88119	5.66785
T120395	LACAT172	-0.4805	0.054	0.987196	1.41843	2.76472
T075627	CAT1484.3	-0.4409	0.055	0.987196	16.8035	23.4815
T319605	CAT909.2	-0.4208	0.055	0.987196	65.616	94.7793
T317393	PRCAT11.3	0.3883	0.055	0.987196	19.9793	38.0491
T011933	CAT57.1	-0.4261	0.055	0.987196	19.9737	29.3159
T309020	CAT843.6	-0.451	0.055	0.987196	3.79587	14.2745
T370941	LVCAT80	-0.4645	0.055	0.987196	2.38362	4.70148
T232198	TUG1.2	-0.3964	0.056	0.987196	57.6175	103.093
T268788	LSCAT273	-0.4348	0.056	0.987196	7.73179	14.4286
T200365	LVCAT88	-0.4297	0.056	0.987196	2.28364	4.37431
T077424	THCAT241	-0.4384	0.056	0.987196	18.0643	23.4266
T101483	CAT1645	-0.397	0.057	0.987196	6.76661	13.8242
T047812	THCAT58	-0.4671	0.057	0.987196	3.26936	5.50106
T054837	ZBED5-AS1.2	-0.4011	0.057	0.987196	6.42926	9.41811
T255834	CAT479	-0.407	0.057	0.987196	11.8326	18.7687
T313012	CAT876	-0.4505	0.057	0.987196	7.95755	21.1227
T027626	CAT147.2	-0.3881	0.057	0.987196	72.6919	88.5441
T300927	CAT786	-0.4	0.058	0.987196	3.62775	7.30451
T346481	KHCAT125	-0.4007	0.058	0.987196	8.5719	16.6557
T291304	KCCAT238	-0.3965	0.058	0.987196	21.5414	38.5496
T242353	CAT405.2	-0.405	0.058	0.987196	11.4884	15.676
T162496	CAT2019	-0.458	0.059	0.987196	2.58253	5.5402
T153012	LACAT7.1	-0.4286	0.059	0.987196	5.38752	7.04916
T011536	CAT55	-0.4333	0.059	0.987196	7.24739	14.4352
T117796	BRCAT185.1	-0.4096	0.059	0.987196	6.49978	9.58558
T321563	KCCAT404	-0.4118	0.059	0.987196	8.14566	12.6786
T282276	BRCAT199	-0.4126	0.06	0.987196	4.07283	7.127
T203646	LSCAT169	-0.4525	0.06	0.987196	3.65926	7.10174
T274020	BRCAT336	-0.39	0.06	0.987196	8.34257	15.1871
T375351	CAT2284	-0.3799	0.06	0.987196	10.4246	14.4928
T049804	CAT1313	-0.4193	0.061	0.987196	9.28993	14.8587
T268988	HICLINC105.1	-0.4334	0.061	0.987196	4.33993	10.7064
T044429	KCCAT544	-0.496	0.062	0.987196	2.26451	7.08144
T151854	CAT1962	-0.406	0.062	0.987196	22.0951	35.8182
T270510	CAT581	-0.4188	0.063	0.987196	3.85755	6.98224
T093633	KCCAT474	-0.4295	0.063	0.987196	3.49322	7.91518
T166690	HNCAT170	-0.3764	0.063	0.987196	7.92578	12.5572
T048595	PDCD4-AS1	-0.4229	0.064	0.987196	19.4812	22.8121
T118681	HNCAT175	-0.4227	0.064	0.987196	3.14546	6.15887
T095092	LINC00458.1	0.4012	0.065	0.987196	17.8235	47.6331
T261493	KHCAT267	-0.3547	0.065	0.987196	19.8308	34.9092
T045279	CAT1284.3	-0.4592	0.065	0.987196	8.71399	42.3622
T081028	CAT1533	-0.4031	0.065	0.987196	8.6193	14.8876
T024481	HICLINC23	0.3994	0.065	0.987196	3.04117	4.82509
T272854	MEAT135	-0.4605	0.066	0.987196	4.80822	9.72714
T268031	CAT573.2	-0.3954	0.066	0.987196	37.4298	68.9349
T288425	BRCAT366.2	-0.4267	0.066	0.987196	15.015	27.5287
T205503	SATB2-AS1.2	-0.408	0.067	0.987196	59.61	104.603
T191079	CAT260.2	-0.3738	0.067	0.987196	9.21198	20.9406
T190890	OVAT4	-0.427	0.067	0.987196	6.28281	13.0102
T111047	GBAT4	-0.408	0.068	0.987196	3.66765	4.95813
T074477	CAT1478	-0.43	0.068	0.987196	1.49135	3.23262
T068757	CAT1435	-0.3609	0.068	0.987196	194.901	278.943
T096087	CAT1621	-0.3852	0.068	0.987196	10.0987	17.2953
T027857	CAT150	-0.37	0.069	0.987196	8.26677	13.0247
T117823	CAT1760.1	-0.3896	0.069	0.987196	553.848	781.869
T272837	CAT594.1	-0.3913	0.069	0.987196	20.9997	40.3016
T367544	LACAT5.3	-0.4022	0.069	0.987196	10.5774	38.5805
T225820	CAT2208.2	-0.424	0.069	0.987196	11.7578	18.0728
T074099	CAT1473.2	-0.3927	0.07	0.987196	69.415	98.5514
T329531	OVAT54	-0.4575	0.07	0.987196	1.64889	2.60762
T244420	HICLINC90	-0.4886	0.071	0.987196	3.07941	6.3556
T006445	HNCAT15	-0.3522	0.072	0.987196	21.7375	49.8118
T233174	CAT2244	-0.3821	0.073	0.987196	71.2904	115.116
T010948	CAT51.1	-0.4295	0.073	0.987196	7.46244	14.1902
T067729	CRAT21.2	-0.4343	0.073	0.987196	6.90057	80.0872
T302771	KCCAT300	-0.4108	0.074	0.987196	4.72393	7.31774
T120550	CAT1777	0.3611	0.074	0.987196	3.31445	33.603
T042675	CAT1266.2	-0.4325	0.074	0.987196	5.9851	7.50305
T175597	CAT2104	-0.4076	0.074	0.987196	7.1958	10.3313
T299155	CAT781	0.4022	0.074	0.987196	41.241	74.8392
T311397	CAT862.2	0.3735	0.075	0.987196	9.2049	25.8756
T097795	KHCAT460	-0.3668	0.075	0.987196	2.64605	4.71263
T363120	LACAT240	-0.3511	0.075	0.987196	43.3891	56.0136
T182500	HNCAT3.1	-0.4132	0.076	0.987196	86.8334	108.797
T070283	CAT1443	-0.3675	0.077	0.987196	14.4831	23.2449
T232812	KHCAT21.2	-0.3911	0.077	0.987196	20.43	38.233
T190151	CAT247	-0.3937	0.077	0.987196	54.4242	83.6035
T234734	LGAT3	-0.4245	0.077	0.987196	2.12584	3.73668
T081143	AMAT79	-0.3831	0.077	0.987196	9.10087	14.091
T298623	CAT778	-0.3603	0.077	0.987196	13.0151	25.5323
T363206	THCAT539	-0.3786	0.077	0.987196	4.11489	6.61101
T109097	MBAT98	-0.4058	0.078	0.987196	2.41173	5.22188
T342446	CAT1026	-0.3647	0.078	0.987196	6.33638	11.8398
T299079	KPCAT13	-0.4006	0.078	0.987196	5.36867	9.72895
T110859	MPAT9	-0.3739	0.078	0.987196	15.9811	25.531
T015476	CAT79	-0.4243	0.078	0.987196	2.48098	5.30155
T126035	KCCAT71	0.3963	0.079	0.987196	17.4984	28.2428
T161783	CAT2015	-0.3894	0.079	0.987196	3.96084	6.29191
T092074	CAT1589	-0.38	0.08	0.987196	10.5182	16.0348
T247979	KCCAT192	-0.4224	0.08	0.987196	2.08848	4.27029
T006614	SNHG12.3	-0.3852	0.081	0.987196	34.4313	57.3517
T246531	CAT428	-0.392	0.081	0.987196	20.4643	23.8838
T162082	LVCAT72	-0.3971	0.082	0.987196	5.31759	10.4867
T292584	AMAT7	-0.377	0.083	0.987196	9.72731	15.4183
T046571	ENTPD1-AS1.5	-0.384	0.083	0.987196	6.60947	10.4737
T340489	CAT1014	-0.3672	0.084	0.987196	41.2599	61.437
T073831	CAT1472.1	-0.4017	0.084	0.987196	26.1729	74.6151
T137578	LINC01082	-0.3792	0.084	0.987196	14.5047	23.453
T269117	CAT578	-0.3709	0.084	0.987196	13.9881	24.5876
T114645	CAT1726	-0.3586	0.085	0.987196	71.0891	99.9278
T078693	KHCAT452	-0.375	0.085	0.987196	5.08019	6.40462
T266800	CAT564	-0.3862	0.085	0.987196	2.9124	5.13536
T295749	HNCAT48	-0.3977	0.085	0.987196	4.06268	6.6212
T263649	CAT535	-0.3834	0.085	0.987196	5.01866	10.4479
T239792	HNCAT181	-0.3782	0.086	0.987196	4.20727	8.89807
T162261	BRCAT296	-0.4151	0.086	0.987196	1.69037	3.09989
T355728	CAT1132	-0.3426	0.086	0.987196	11.2194	17.5758
T131097	THCAT216	-0.3571	0.086	0.987196	3.94958	7.14801
T006588	OVAT16	-0.373	0.087	0.987196	6.43225	9.94668
T203114	CAT331.1	-0.3969	0.087	0.987196	4.39962	9.77308
T373737	UTAT48	-0.3612	0.087	0.987196	16.2507	29.6788
T241933	KIF9-AS1.2	0.3715	0.088	0.987196	11.5727	17.3332
T266581	CAT557	-0.3656	0.088	0.987196	7.64117	10.2844
T322043	CAT930	-0.3662	0.088	0.987196	19.348	32.7011
T151756	CAT1959	-0.3906	0.088	0.987196	3.24718	5.01627
T022079	KCCAT559	-0.405	0.089	0.987196	4.12222	9.14929
T190889	CAT257	-0.3996	0.089	0.987196	2.25786	4.21367
T109219	CAT1696	-0.3912	0.089	0.987196	20.5655	26.2351
T260527	MPAT14	-0.4082	0.089	0.987196	106.852	172.588
T248563	CAT434	-0.3276	0.09	0.987196	45.9505	76.7495
T089589	CAT1581	-0.325	0.09	0.987196	9.81203	17.3392
T201904	CAT323	-0.3425	0.09	0.987196	19.4546	29.8081
T346024	AMAT104	-0.3557	0.091	0.987196	7.40681	13.4166
T081164	BRCAT363	-0.3549	0.092	0.987196	16.6097	30.2831
T184382	CAT209	-0.3488	0.092	0.987196	32.8939	47.1811
T191209	BRCAT215	-0.4031	0.093	0.987196	1.32303	2.3298
T216117	CAT2156	-0.3499	0.093	0.987196	14.8136	23.2079
T127076	CRAT22	-0.355	0.094	0.987196	3.52204	6.28443
T290795	KCCAT184	-0.3791	0.095	0.987196	3.40687	6.44861
T151552	CAT1957.2	-0.3581	0.095	0.987196	28.8015	39.3628
T062707	CAT1383.2	-0.381	0.095	0.987196	9.72206	28.5762
T330608	CAT964.1	0.3469	0.096	0.987196	14.6947	39.1967
T034582	CAT195.1	-0.3818	0.096	0.987196	20.1113	46.3842
T282677	CAT665	-0.3477	0.096	0.987196	29.3803	46.9093
T207121	CAT364	-0.3731	0.096	0.987196	2.71777	4.99399
T056319	CAT1345.4	0.3489	0.096	0.987196	18.836	26.7955
T114595	CAT1724.2	0.3336	0.097	0.987196	12.5315	19.7089
T266617	CAT558.1	-0.3455	0.097	0.987196	47.0945	67.7458
T115675	MBAT111	-0.3757	0.097	0.987196	8.29032	11.5158
T093217	KCCAT398	-0.3682	0.098	0.987196	3.94958	10.3636
T256728	CAT491.3	0.3406	0.098	0.987196	23.6996	34.649
T346726	CAT1058.2	-0.3521	0.099	0.987196	55.4724	79.5504
T320581	HOXA11-AS.1	-0.3651	0.099	0.987196	223.411	393.957
T085537	CAT1564	-0.38	0.1	0.987196	3.21219	5.43818
T029274	LSCAT255	-0.3639	0.1	0.987196	2.82184	5.47966
T359956	CAT1147.1	-0.3704	0.1	0.987196	45.4679	103.643
T340488	CAT1013.1	-0.3503	0.1	0.987196	115.038	175.013
T301687	PRCAT15.2	-0.3446	0.1	0.987196	137.754	162.358
T343093	MBAT81	-0.352	0.1	0.987196	57.5247	94.8872
T165114	LSCAT207	-0.35	0.1	0.987196	71.9892	123.682
T067663	CAT1425.2	-0.3146	0.1	0.987196	8.15332	13.2111
T050678	CAT1319.2	-0.3916	0.1	0.987196	4.58497	9.13688
T228000	LINC00316	-0.366	0.1	0.987196	2.45377	4.28752
T264753	HNCAT271	-0.3701	0.1	0.987196	18.3807	31.1973
T331760	CAT970	-0.3435	0.1	0.987196	3.88467	5.82417
T016921	LACAT218	-0.3938	0.1	0.987196	2.64732	3.95923
T351183	CAT1098.2	-0.389	0.1	0.987196	22.6815	47.6384
T151603	CAT1958	-0.3369	0.11	0.987196	8.9167	12.6347
T153365	KCNJ2-AS1	-0.3689	0.11	0.987196	28.3064	37.6027
T202996	CAT328.2	-0.3823	0.11	0.987196	38.227	121.507
T314610	LSCAT171	-0.3596	0.11	0.987196	4.38607	6.45471
T163562	CAT2029.2	-0.316	0.11	0.987196	5.18143	8.49912
T212172	CAT2137.1	0.3268	0.11	0.987196	62.649	95.2831
T253759	MBAT59	-0.3273	0.11	0.987196	6.60151	9.99073
T193443	LINC00152.2	-0.3625	0.11	0.987196	10.2792	16.6931
T202512	CERS6-AS1	-0.3281	0.11	0.987196	1821.11	2498.42
T376428	MBAT1	-0.3345	0.11	0.987196	278.839	577.338
T225285	IL10RB-AS1.2	-0.354	0.11	0.987196	14.8716	22.4093
T226599	PRCAT46.2	-0.3801	0.11	0.987196	3.88467	7.33581
T097738	PRCAT155	-0.3717	0.11	0.987196	1.7445	3.19943
T163183	SMAT32	-0.308	0.11	0.987196	24.8936	36.4964
T050959	LINC00959	-0.334	0.11	0.987196	20.0578	30.1913
T005000	ESAT117	-0.341	0.11	0.987196	186.081	270.56
T100325	CAT1639	-0.364	0.11	0.987196	13.2303	20.2398
T065389	AMAT187	-0.391	0.11	0.987196	2.26451	3.30763
T253102	LINC00886.1	0.3328	0.11	0.987196	2.68155	13.0474
T067730	CRAT21.1	-0.3663	0.11	0.987196	43.2342	112.452
T133789	ESAT4	0.3376	0.11	0.987196	26.2198	96.2713
T036557	UTAT40	0.3238	0.11	0.987196	182.098	286.84
T116064	CMAT29	-0.32	0.11	0.987196	4.10588	9.512
T108900	THCAT584.2	-0.3589	0.11	0.987196	9.3654	13.3946
T343933	MPAT13	-0.3089	0.11	0.987196	13.245	21.7931
T112270	LACAT82.2	-0.358	0.11	0.987196	9.92915	15.8153
T092694	KHCAT330	-0.3767	0.11	0.987196	1.76834	5.78381
T340491	CAT1013.2	-0.3265	0.11	0.987196	49.0628	81.7729
T228577	KCCAT665.2	0.3328	0.11	0.987196	138.202	599.018
T064081	CAT1397	-0.3291	0.11	0.987196	55.6992	95.3334
T376410	FTX	-0.3302	0.11	0.987196	9.75095	19.894
T135288	LACAT3	-0.3574	0.11	0.987196	237.17	337.731
T352639	KHCAT401	-0.3661	0.11	0.987196	5.22697	8.21276
T032676	CAT185.1	-0.349	0.11	0.987196	15.6348	25.5662
T264423	CAT542.2	-0.379	0.11	0.987196	3.08199	5.47172
T096016	HICLINC289.3	-0.3713	0.11	0.987196	8.19078	16.3479
T009216	CAT40.1	-0.3379	0.12	0.987196	44.6624	74.559
T075833	CAT1487	-0.3611	0.12	0.987196	49.3598	81.8748
T023590	CAT128	-0.3323	0.12	0.987196	23.9113	40.906
T281010	NADK2-AS1	-0.3179	0.12	0.987196	10.7404	18.8337
T082082	BRCAT402	-0.3565	0.12	0.987196	4.1383	7.04459
T282454	CAT663	-0.3273	0.12	0.987196	3.98629	7.00601
T070407	CAT1446	-0.3452	0.12	0.987196	6.17911	9.48247
T186375	ESAT111	-0.338	0.12	0.987196	37.3148	55.7248
T281710	KCCAT584	-0.3705	0.12	0.987196	6.8116	10.2913
T129963	LSCAT250	-0.3391	0.12	0.987196	7.40308	10.6552
T376030	CAT2288	-0.3571	0.12	0.987196	18.7963	35.1855
T373767	CAT2278	-0.3434	0.12	0.987196	5.75795	11.231
T337675	CAT1002.2	-0.3344	0.12	0.987196	61.8569	102.154
T164907	THCAT551	-0.3434	0.12	0.987196	13.0279	18.9593
T340776	CAT1016	-0.3272	0.12	0.987196	30.0253	42.0703
T249970	CAT445	0.3332	0.12	0.987196	30.4938	53.0072
T049892	CAT1314	-0.3579	0.12	0.987196	4.36652	8.26013
T163134	CAT2027	-0.3587	0.12	0.987196	2.61141	3.72311
T068507	THCAT545	-0.36	0.12	0.987196	21.4945	36.3353
T201796	CAT322	-0.3433	0.12	0.987196	13.4643	19.2146
T120968	KHCAT119	-0.3442	0.12	0.987196	12.7989	20.0173
T114522	CAT1724.3	0.353	0.12	0.987196	3.06232	7.24124
T153661	LINC00511.12	-0.3198	0.12	0.987196	10.9857	20.7678
T049321	CASC2.1	-0.2999	0.12	0.987196	23.1785	33.6044
T290541	CAT725	-0.3437	0.12	0.987196	5.60039	9.3714
T195054	KCCAT362.1	0.3183	0.12	0.987196	2.91365	3.98154
T060079	CAT1363.2	-0.3391	0.13	0.987196	73.407	127.247
T356780	THCAT258	-0.3321	0.13	0.987196	6.66589	14.4617
T286149	CAT693	-0.3172	0.13	0.987196	6.02284	9.56153
T241435	BRCAT382	-0.3426	0.13	0.987196	3.92676	9.06187
T181772	ZNF667-AS1.4	-0.308	0.13	0.987196	9.60153	14.709
T008594	CAT36	-0.3146	0.13	0.987196	91.3072	139.958
T041730	CAT1259.1	-0.3191	0.13	0.987196	28.727	43.9023
T341003	UTAT31	-0.3396	0.13	0.987196	27.5709	41.7242
T318336	CAT899	-0.3599	0.13	0.987196	12.8325	24.1065
T359954	CAT1147.2	-0.3367	0.13	0.987196	7.8034	21.3997
T264333	CRAT17.1	-0.4096	0.13	0.987196	8.57044	24.2549
T058039	LRP4-AS1.1	-0.3151	0.13	0.987196	6.96375	18.8085
T072488	CAT1465.1	-0.301	0.13	0.987196	12.8585	18.6965
T290539	CAT724	-0.3696	0.13	0.987196	6.78713	10.2785
T297391	CAT769	-0.3144	0.13	0.987196	2.18369	3.56509
T130417	MEAT129	-0.3349	0.13	0.987196	10.3991	17.6776
T203779	TTN-AS1.4	0.3158	0.13	0.987196	6.72482	9.98894
T236518	CAT2267	-0.3003	0.13	0.987196	14.89	25.4932
T365062	CAT1184.2	-0.3342	0.13	0.987196	156.314	270.863
T364851	CAT1182	-0.3365	0.13	0.987196	12.3869	20.0391
T151101	CAT1956.2	-0.3326	0.13	0.987196	6.11199	10.325
T146834	CAT1930	0.327	0.13	0.987196	20.3134	105.364
T262495	AMAT130	-0.3433	0.13	0.987196	3.10324	6.44198
T243187	CAT408	-0.3284	0.14	0.987196	6.84056	9.9339
T017152	MBAT107	-0.303	0.14	0.987196	114.236	157.204
T130237	CAT1845.2	-0.3473	0.14	0.987196	7.80049	11.6029
T074221	CAT1474	-0.3296	0.14	0.987196	15.0445	42.1411
T017434	CAT88	0.3018	0.14	0.987196	17.5624	30.4394
T337425	CAT1001	-0.3208	0.14	0.987196	44.0296	68.373
T186606	THCAT207	-0.357	0.14	0.987196	11.2335	18.379
T168498	CAT2064	-0.2972	0.14	0.987196	331.124	520.361
T092173	CAT1590	-0.3	0.14	0.987196	7.89167	15.2076
T231513	MBAT2	-0.3142	0.14	0.987196	2.43774	4.46562
T030046	AMAT8	-0.2942	0.14	0.987196	16.5559	23.5213
T189180	AMAT91	-0.3044	0.14	0.987196	16.0189	25.7255
T187678	BRCAT143.1	-0.3653	0.14	0.987196	6.5465	14.4946
T347140	LACAT252	-0.3647	0.14	0.987196	2.49971	5.78949
T380370	MIR503HG.2	-0.3265	0.14	0.987196	10.3926	23.1092
T300934	HCP5.2	0.2988	0.14	0.987196	947.946	1157.18
T104423	CAT1663	-0.2955	0.14	0.987196	15.464	19.0741
T317019	HNCAT160	0.3014	0.14	0.987196	5.44161	8.1667
T037681	LSCAT274	-0.348	0.14	0.987196	2.40914	4.06387
T153648	LINC00511.9	-0.353	0.14	0.987196	52.1884	70.4851
T153649	LINC00511.10	-0.3146	0.14	0.987196	205.27	288.411
T223557	HICLINC383	-0.3134	0.14	0.987196	4.86365	8.43006
T284448	ESAT115	-0.3071	0.15	0.987196	24.0199	29.8457
T078794	CAT1518	0.3114	0.15	0.987196	514.039	965.944
T330617	LINC01004.1	-0.3402	0.15	0.987196	2.70726	4.98296
T272852	CAT595	-0.2904	0.15	0.987196	16.9753	30.2967
T027623	CAT147.1	-0.3478	0.15	0.987196	18.407	26.6494
T065017	THCAT175	-0.2855	0.15	0.987196	13.6659	20.8507
T232833	HNCAT71.1	0.3297	0.15	0.987196	5.38341	10.5603
T272834	CAT593.2	-0.32	0.15	0.987196	7.61791	10.7886
T045844	KCCAT174	-0.3014	0.15	0.987196	18.4927	27.6513
T277464	CAT634.2	0.3293	0.15	0.987196	18.1862	23.6813
T011237	CAT53.1	-0.3093	0.15	0.987196	49.1637	67.6818
T144723	UTAT55	0.2912	0.15	0.987196	7.001	11.1169
T089127	CAT1579	-0.3187	0.15	0.987196	61.1534	119.212
T369399	SNHG7.2	0.3057	0.15	0.987196	788.265	1095.76
T366257	CAT1192.1	-0.3075	0.15	0.987196	5.8398	9.02829
T302914	OVAT51	-0.3292	0.15	0.987196	3.5947	5.72715
T090928	CAT1584	-0.3218	0.15	0.987196	3.31445	7.68869
T167146	KCCAT517	-0.3509	0.15	0.987196	2.12584	3.89104
T268838	THCAT366	-0.2974	0.15	0.987196	8.22951	12.2129
T297390	CAT768	-0.3162	0.15	0.987196	3.50196	5.41361
T309621	CAT846	-0.3042	0.15	0.987196	31.975	51.6829
T317387	PRCAT11.1	0.2975	0.15	0.987196	118.353	213.239
T213646	CAT2142.3	-0.3072	0.15	0.987196	8.86463	17.5206
T086331	OVAT1	-0.3227	0.15	0.987196	3.89335	5.4784
T165236	CAT2039.1	-0.3434	0.15	0.987196	10.2887	21.854
T016134	KCCAT131.2	-0.3355	0.15	0.987196	4.06722	6.01453
T012896	GNG12-AS1.3	-0.299	0.15	0.987196	28.0911	37.5274
T302546	CAT797	-0.331	0.15	0.987196	5.92023	9.17906
T015157	THCAT610	-0.3178	0.15	0.987196	29.149	46.0936
T082138	CRAT26	-0.3424	0.15	0.987196	3.91175	6.64544
T209380	CAT375.2	-0.2767	0.15	0.987196	27.6454	59.1238
T201135	KCCAT573	-0.3148	0.15	0.987196	12.1348	21.7891
T259778	NOP14-AS1.2	-0.3432	0.15	0.987196	10.1835	15.4952
T188864	KCCAT518	-0.322	0.15	0.987196	3.31445	5.99813
T127418	MBAT97	-0.283	0.16	0.987196	3.27753	5.49026
T010075	CAT42.1	-0.3164	0.16	0.987196	4.7243	7.70256
T108899	THCAT584.1	-0.2914	0.16	0.987196	7.7513	13.0207
T179645	CAT2125	-0.3152	0.16	0.987196	2.48944	3.33518
T078694	CAT1515	-0.2997	0.16	0.987196	3.88453	7.0932
T152326	CAT1964.1	-0.3185	0.16	0.987196	11.6098	25.99
T291867	OVAT118	-0.3121	0.16	0.987196	5.23696	8.48397
T167663	KCCAT456	-0.331	0.16	0.987196	2.40792	6.72241
T144655	AMAT19	-0.2963	0.16	0.987196	20.8334	46.3591
T293002	CAT743	-0.2845	0.16	0.987196	8.34266	14.0031
T232197	TUG1.1	-0.2935	0.16	0.987196	122.438	193.158
T000306	THCAT96.1	-0.3465	0.16	0.987196	3.24035	6.60774
T335044	KPCAT8	-0.3071	0.16	0.987196	2.62256	5.00486
T353800	CAT1121.2	0.2742	0.16	0.987196	12.3387	33.2103
T370670	ARSD-AS1	-0.3014	0.16	0.987196	221.194	341.586
T010945	CAT51.3	-0.3143	0.16	0.987196	4.16501	7.22066
T346504	KCCAT503	-0.3244	0.16	0.987196	5.96601	17.6502
T304570	OVAT136	-0.2934	0.16	0.987196	4.21366	8.6568
T348722	CAT1075	-0.2845	0.16	0.987196	4.59034	9.23716
T108742	KHCAT61	-0.3491	0.16	0.987196	6.16398	13.6167
T112011	BRCAT35	-0.3469	0.16	0.987196	4.98573	13.0377
T068455	CAT1433.2	-0.3154	0.16	0.987196	90.4599	167.32
T227683	CAT2218	0.2789	0.16	0.987196	15.0296	37.4839
T379477	KCCAT543	-0.3076	0.16	0.987196	4.87548	10.4701
T187946	THCAT573	-0.2995	0.16	0.987196	6.33638	9.38625
T064086	CAT1398	-0.2901	0.16	0.987196	12.405	22.3702
T098024	STK24-AS1	-0.3133	0.16	0.987196	6.32841	8.49402
T252993	PLCH1-AS1	-0.3127	0.16	0.987196	6.49436	10.2903
T350921	CAT1095	-0.3091	0.16	0.987196	5.52887	8.49986
T131766	OVAT38	-0.2962	0.16	0.987196	2.91149	4.8885
T367341	CAT1202.3	0.3147	0.16	0.987196	156.598	216.255
T377634	CAT2296	-0.3326	0.16	0.987196	2.91456	9.66689
T286538	RGMB-AS1.1	-0.3574	0.16	0.987196	9.34621	39.1788
T304560	CAT808	-0.2926	0.16	0.987196	336.011	516.622
T255144	MEAT98	-0.3186	0.16	0.987196	5.82731	8.75886
T214610	THCAT420	-0.3158	0.16	0.987196	1.49135	8.23696
T196995	CAT298	-0.3303	0.16	0.987196	3.58238	6.35252
T366269	CAT1193	-0.3047	0.16	0.987196	69.4226	112.629
T153640	LSCAT59.1	-0.3234	0.16	0.987196	10.2305	22.2848
T359449	CMAT24	-0.3035	0.17	0.987196	3.96333	6.7996
T060078	CAT1363.1	-0.3563	0.17	0.987196	8.60491	14.0592
T301683	PRCAT30.2	-0.328	0.17	0.987196	38.0731	54.8272
T172132	LINC00662.1	-0.287	0.17	0.987196	33.7665	47.9918
T052341	AMAT13	0.2868	0.17	0.987196	26.9474	38.9306
T272952	CAT596.1	0.3032	0.17	0.987196	16.1926	23.0406
T093645	CAT1605	-0.2685	0.17	0.987196	22.6013	44.8805
T043199	CAT1269	-0.261	0.17	0.987196	44.7786	61.6781
T188048	CAT234.1	-0.2961	0.17	0.987196	132.363	212.126
T314344	EZR-AS1	-0.3064	0.17	0.987196	11.655	21.0636
T033397	CAT190.1	0.2884	0.17	0.987196	5.94369	9.87133
T037147	CAT1229	-0.2932	0.17	0.987196	31.8638	52.8076
T048719	CAT1304	-0.2897	0.17	0.987196	13.4221	23.0205
T072394	CAT1463	-0.284	0.17	0.987196	8.80201	15.3015
T345171	CAT1052	-0.3048	0.17	0.987196	4.57323	7.36636
T119187	MPAT4	-0.2914	0.17	0.987196	5.82731	9.63596
T347092	THCAT376	-0.3228	0.17	0.987196	1.65624	4.39908
T363039	CAT1168.4	-0.308	0.17	0.987196	15.5902	22.7274
T313616	MBAT75	-0.294	0.17	0.987196	26.2176	33.9441
T178055	CAT2119	-0.3003	0.17	0.987196	4.38159	9.45408
T240653	AMAT5	-0.2821	0.17	0.987196	29.04	51.2893
T371666	CVAT1	0.2933	0.17	0.987196	5.26609	8.87592
T269766	ESAT1.1	-0.2838	0.17	0.987196	20.4675	28.793
T172966	KHCAT3.1	-0.3101	0.17	0.987196	8.06621	15.1809
T138053	CAT1884.5	-0.3162	0.17	0.987196	5.21506	8.33588
T326472	GBAT6	-0.3014	0.17	0.987196	4.38426	6.29891
T238611	CAT388	-0.2928	0.17	0.987196	3.91737	8.31888
T283494	MAST4-AS1	-0.2938	0.17	0.987196	4.16954	7.73533
T288870	CAT714	-0.2676	0.17	0.987196	66.6253	113.887
T263710	UGDH-AS1.4	-0.3121	0.17	0.987196	9.23082	14.7701
T358163	CAT1141.4	-0.2793	0.17	0.987196	471.282	601.991
T168316	MEAT145	-0.3047	0.17	0.987196	4.25529	7.82142
T018933	UTAT50	-0.3066	0.18	0.987196	3.18297	6.35218
T066064	CAT1413	0.2738	0.18	0.987196	4.94666	10.0649
T238558	FGD5-AS1.4	-0.2825	0.18	0.987196	184.797	267.146
T061741	AMAT78	-0.29	0.18	0.987196	7.1809	11.536
T018573	CAT98	-0.3063	0.18	0.987196	2.15338	3.17619
T047176	KHCAT94	-0.2793	0.18	0.987196	4.11489	6.64932
T254690	KHCAT378	-0.2719	0.18	0.987196	6.32503	10.2967
T006619	SNHG12.2	-0.2891	0.18	0.987196	20.0598	29.6836
T321490	CAT922	-0.2968	0.18	0.987196	11.3414	17.0997
T023519	CAT124	-0.2925	0.18	0.987196	6.80707	10.1093
T133095	KCCAT244	-0.3067	0.18	0.987196	4.0892	9.01177
T097796	DNAJC3-AS1.2	-0.2977	0.18	0.987196	38.2904	54.7384
T060417	CAT1366	-0.2843	0.18	0.987196	4.51509	10.9303
T298139	CAT776	-0.3068	0.18	0.987196	37.75	67.869
T283155	GBAT18	-0.2781	0.18	0.987196	193.739	255.54
T046744	CAT1293	-0.2728	0.18	0.987196	14.9217	24.7093
T159666	CAT2005.1	0.2713	0.18	0.987196	261.134	362.181
T166626	KCCAT82.1	0.266	0.18	0.987196	59.4721	92.0572
T045004	LINC00857.2	0.2865	0.18	0.987196	30.8435	52.0355
T165021	MBAT56	-0.3365	0.18	0.987196	4.37297	8.92549
T127212	CAT1816	-0.278	0.18	0.987196	351.993	532.078
T320583	HOXA11-AS.3	-0.298	0.18	0.987196	247.796	407.849
T093420	KHCAT335	-0.289	0.18	0.987196	3.47749	6.02225
T288161	CAT707.2	0.2621	0.18	0.987196	17.8534	25.9682
T137658	FENDRR.4	-0.2675	0.18	0.987196	99.5819	120.961
T119869	AMAT38	-0.289	0.18	0.987196	6.86282	9.78994
T234936	LSCAT242	-0.303	0.18	0.987196	3.22495	5.91703
T190564	KCCAT262	-0.267	0.18	0.987196	19.0687	32.7326
T045545	CAT1285.2	-0.2825	0.18	0.987196	91.4697	127.732
T272256	KHCAT423	-0.2715	0.18	0.987196	8.16242	12.9508
T256648	CAT487.1	0.2794	0.19	0.987196	1.63946	6.00327
T087627	UTAT57	-0.2735	0.19	0.987196	18.1377	26.8828
T017712	CAT92	-0.2815	0.19	0.987196	5.43554	8.23716
T354679	CAT1125.1	-0.3202	0.19	0.987196	4.62945	7.49912
T315249	CAT887	-0.2877	0.19	0.987196	3.98859	8.98385
T107629	AMAT62	-0.2998	0.19	0.987196	2.0446	3.71526
T241245	KHCAT284	-0.2838	0.19	0.987196	114.219	189.543
T039117	ESAT116.2	-0.252	0.19	0.987196	187.135	221.544
T226069	LINC00114	-0.296	0.19	0.987196	5.12986	13.6907
T258422	AMAT57	-0.2876	0.19	0.987196	2.66498	4.48858
T191277	CAT261	-0.2737	0.19	0.987196	10.8796	16.8738
T196443	KHCAT175	-0.2845	0.19	0.987196	2.80484	4.49877
T126429	LGAT114	-0.3152	0.19	0.987196	8.23741	11.241
T191965	CAT264.1	-0.2854	0.19	0.987196	72.5016	117.495
T054676	SBF2-AS1.4	-0.281	0.19	0.987196	26.5006	33.2554
T275025	KHCAT360	-0.2746	0.19	0.987196	2.34966	4.56154
T333399	HRAT19	-0.3016	0.19	0.987196	3.57542	7.9305
T081866	CAT1546	-0.2729	0.19	0.987196	125.365	183.301
T202343	PRCAT52	-0.2701	0.19	0.987196	15.1019	20.3115
T093207	CAT1599	-0.2903	0.19	0.987196	3.74068	9.55393
T175035	KCCAT381	-0.3349	0.19	0.987196	1.4016	2.4368
T060613	CAT1370	-0.2693	0.19	0.987196	36.7454	49.6091
T056985	CAT1350.3	-0.2829	0.19	0.987196	389.488	612.435
T353728	FAM83H-AS1.5	0.2967	0.19	0.987196	22.7069	36.4834
T338059	CAT1004	-0.2875	0.19	0.987196	60.404	87.1047
T240634	ENTPD3-AS1.2	-0.2719	0.19	0.987196	16.3184	23.7308
T240632	ENTPD3-AS1.3	-0.2719	0.19	0.987196	16.3184	23.7308
T124669	CAT1800.2	-0.2909	0.19	0.987196	26.6723	41.8816
T080860	CAT1532	-0.265	0.19	0.987196	12.5818	18.2106
T062480	SMAT33	-0.2551	0.19	0.987196	12.2386	21.2563
T191082	CAT260.1	-0.2784	0.19	0.987196	6.42926	11.5508
T079753	CAT1526	-0.3173	0.19	0.987196	4.24294	6.25792
T311861	CAT865	-0.271	0.19	0.987196	53.5744	96.1925
T048559	LVCAT33	0.2832	0.19	0.987196	35.6522	66.55
T326473	GBAT12	-0.2839	0.19	0.987196	2.36163	3.84376
T342925	CAT1034	0.272	0.19	0.987196	10.7274	21.684
T351720	THCAT385	-0.2633	0.19	0.987196	21.0363	32.5281
T160541	CAT2010	-0.2566	0.19	0.987196	50.6983	68.5675
T074425	CAT1477.2	-0.2861	0.19	0.987196	27.3328	40.4255
T177855	CAT2117.2	0.2841	0.19	0.987196	0.340123	3.66752
T152337	CAT1966.2	-0.2669	0.19	0.987196	20.369	30.6244
T367340	CAT1202.2	0.2887	0.19	0.987196	6.25792	15.1793
T048876	CAT1306	-0.2989	0.19	0.987196	9.21728	12.7502
T302927	AMAT76	-0.282	0.19	0.987196	5.43044	8.62789
T136965	KHCAT198	-0.335	0.19	0.987196	2.31922	4.10371
T190486	CAT249.3	0.2844	0.19	0.987196	9.26639	21.0275
T162567	HICLINC356.6	-0.3123	0.19	0.987196	3.03812	4.63296
T314380	CAT885.1	-0.2721	0.2	0.987196	58.9286	74.614
T081835	CAT1545	-0.237	0.2	0.987196	22.5363	37.041
T287545	CAT701.1	-0.2767	0.2	0.987196	11.7302	15.0862
T109790	KHCAT257	-0.2721	0.2	0.987196	23.554	29.2888
T272992	CAT597	-0.3198	0.2	0.987196	8.83955	14.1739
T168785	CAT2066	-0.2571	0.2	0.987196	11.918	22.6312
T007719	CRAT23.2	-0.3339	0.2	0.987196	19.2238	47.2062
T012889	CAT64	-0.2729	0.2	0.987196	11.602	18.2393
T325122	CAT942.2	0.2537	0.2	0.987196	48.0477	69.9744
T378515	MBAT109	-0.2749	0.2	0.987196	70.7747	121.199
T103126	CAT1655	-0.311	0.2	0.987196	2.86363	4.95895
T150428	CAT1952.2	-0.3015	0.2	0.987196	5.03249	11.6314
T251873	CAT456	-0.2905	0.2	0.987196	1.7537	4.30596
T154947	PNAT127	-0.2854	0.2	0.987196	9.9613	27.3536
T043904	CAT1276	-0.2757	0.2	0.987196	8.10609	12.9075
T150560	LACAT270	-0.2898	0.2	0.987196	128.995	191.469
T087800	CAT1576	-0.2546	0.2	0.987196	9.55184	13.6217
T234245	CAT2251.2	-0.258	0.2	0.987196	9.83187	14.418
T291552	CAT733.2	-0.2994	0.2	0.987196	3.30075	5.1071
T331729	ST7-AS1	-0.2934	0.2	0.987196	14.5736	22.9374
T305326	LSCAT162.1	-0.2908	0.2	0.987196	3.14953	5.67493
T019757	CAT106	-0.2797	0.2	0.987196	13.7848	19.6523
T191200	THCAT609	-0.259	0.2	0.987196	53.1397	120.128
T026504	KHCAT462	-0.258	0.2	0.987196	12.495	21.8874
T340385	CAT1011	-0.2681	0.2	0.987196	112.056	168.061
T020194	HRAT4	-0.2863	0.2	0.987196	1.79735	3.71169
T123255	CAT1791.2	-0.2788	0.2	0.987196	3.83443	6.94736
T042006	CVAT27	-0.2744	0.2	0.987196	13.5634	20.545
T231415	MIAT.1	-0.2802	0.2	0.987196	7.81798	19.7852
T351189	CCAT1.4	-0.295	0.2	0.987196	51.3227	108.559
T281074	CAT652	-0.267	0.2	0.987196	72.0563	99.6059
T182559	THCAT294	0.2722	0.2	0.987196	4.02376	8.85733
T327879	CAT951	-0.2789	0.2	0.987196	4.29545	11.2873
T293862	CAT749.2	-0.2667	0.2	0.987196	16.4332	25.8422
T190747	CAT253.3	0.2765	0.2	0.987196	17.45	26.3152
T049521	UTAT56	-0.2788	0.2	0.987196	14.0934	20.9264
T014702	KCCAT314	-0.2609	0.21	0.987196	9.71167	12.393
T340567	CAT1015	-0.264	0.21	0.987196	42.9756	66.3032
T037819	CAT1235.2	-0.25	0.21	0.987196	162.221	190.317
T240667	GBAT1	-0.2651	0.21	0.987196	112.865	186.284
T307419	CAT833	-0.2451	0.21	0.987196	13.3952	20.778
T237145	CAT381	-0.2642	0.21	0.987196	5.10049	10.578
T351213	CAT1098.1	-0.2996	0.21	0.987196	23.8301	46.3284
T306349	LINC00472.1	0.272	0.21	0.987196	1.02749	2.92138
T318494	CAT904.3	0.2556	0.21	0.987196	33.1021	57.5914
T070189	CAT1441.1	-0.2458	0.21	0.987196	7.78504	13.1782
T048717	KCCAT475	-0.2474	0.21	0.987196	113.114	218.896
T237107	BHLHE40-AS1	-0.2849	0.21	0.987196	11.3033	14.6342
T015544	CAT80.2	-0.2498	0.21	0.987196	37.2852	67.4585
T020993	CAT112.1	-0.2645	0.21	0.987196	16.8449	22.7083
T245056	FOXP1-AS1.2	-0.2549	0.21	0.987196	4.8168	8.95072
T252785	KCCAT39	-0.29	0.21	0.987196	2.18524	3.64742
T345611	LACAT125	-0.2897	0.21	0.987196	0.123315	3.57932
T046285	CAT1290	-0.2707	0.21	0.987196	9.46557	12.5119
T353606	OVAT103	0.2445	0.21	0.987196	2.06398	3.65122
T086012	USP30-AS1	-0.255	0.21	0.987196	42.2145	72.2072
T342857	CAT1031	-0.2941	0.21	0.987196	121.378	182.649
T331223	MBAT104	-0.292	0.21	0.987196	2.58112	4.4809
T179427	KHCAT1	-0.2636	0.21	0.987196	47.7064	113.954
T179786	KCCAT550	-0.2957	0.21	0.987196	3.49686	6.55935
T249506	MEAT120	-0.282	0.21	0.987196	10.065	22.087
T225402	LINC00649.3	0.2568	0.21	0.987196	63.4625	104.454
T282973	PART1.3	-0.283	0.21	0.987196	8.81389	33.364
T290017	HICLINC140.1	-0.2569	0.21	0.987196	84.0196	104.307
T139948	KHCAT383	-0.2819	0.22	0.987196	4.02398	12.2333
T333063	UTAT11	-0.2908	0.22	0.987196	3.21219	6.53309
T247954	MBAT87	-0.2838	0.22	0.987196	59.8223	122.52
T061702	OVAT47	-0.2569	0.22	0.987196	30.1748	39.2341
T074098	CAT1473.3	-0.2686	0.22	0.987196	494.954	702.571
T156491	LACAT124	0.2912	0.22	0.987196	2.27301	4.20794
T154062	KCCAT137	-0.2924	0.22	0.987196	3.39676	4.88913
T138853	VPS9D1-AS1.3	0.2855	0.22	0.987196	46.2375	71.7182
T196766	KCCAT87	-0.27	0.22	0.987196	2.38359	3.87032
T074283	CAT1475	-0.233	0.22	0.987196	5.2661	10.6691
T062970	HNCAT158	-0.2569	0.22	0.987196	29.3039	46.0214
T061553	CAT1375.1	-0.2686	0.22	0.987196	16.6638	23.4049
T363705	THCAT71	-0.257	0.22	0.987196	4.45587	7.73944
T067507	MBAT110	-0.2708	0.22	0.987196	17.9943	30.866
T283685	CRAT25	-0.2513	0.22	0.987196	35.8292	47.5105
T007150	CAT33	-0.2778	0.22	0.987196	3.10489	4.46836
T115991	CAT1736.1	-0.268	0.22	0.987196	51.2765	97.4006
T012274	CAT61	-0.263	0.22	0.987196	67.1971	114.889
T105421	CAT1673	-0.2398	0.22	0.987196	9.76125	20.0356
T322424	PRCAT233	-0.2433	0.22	0.987196	8.48763	14.099
T225628	LACAT122	-0.272	0.22	0.987196	5.48343	15.2707
T244169	KHCAT183	-0.277	0.22	0.987196	3.80606	7.10011
T030998	CAT171.3	0.2749	0.22	0.987196	6.64047	13.2956
T281807	CAT657.1	-0.291	0.22	0.987196	3.31445	6.7184
T254330	CAT470	-0.2733	0.22	0.987196	6.55698	11.047
T299205	BRCAT93	0.2949	0.22	0.987196	3.71322	6.36244
T273306	CAT599	-0.259	0.22	0.987196	12.8863	17.8314
T149878	PRAC2	-0.271	0.22	0.987196	22.619	44.7086
T357795	CAT1140	-0.2828	0.22	0.987196	3.42359	5.61528
T071746	CAT1456	0.2779	0.22	0.987196	201.639	318.414
T056868	CAT1348	-0.2647	0.22	0.987196	630.8	815.692
T060210	THCAT226	-0.2613	0.22	0.987196	16.1184	20.4146
T228576	KCCAT665.1	0.2572	0.22	0.987196	71.0732	636.789
T064417	LACAT23	-0.2885	0.22	0.987196	96.2246	225.768
T252716	CAT458	-0.2379	0.22	0.987196	14.6973	25.4562
T177396	CAT2113.1	0.2557	0.22	0.987196	44.3524	57.3554
T063079	LACAT40	-0.289	0.22	0.987196	6.98228	11.6334
T141772	LVCAT40	-0.2696	0.22	0.987196	106.802	146.728
T363791	CAT1174.2	-0.253	0.22	0.987196	12.2135	18.9177
T153681	CAT1974.6	0.2593	0.22	0.987196	10.7165	14.9804
T178006	KCCAT624	0.2481	0.22	0.987196	207.241	353.309
T075692	AMAT98	-0.2516	0.22	0.987196	5.0951	9.81575
T269088	PRCAT175	-0.2925	0.22	0.987196	1.50503	3.21552
T226583	PRCAT17.6	-0.274	0.22	0.987196	11.5245	18.0679
T274571	HAND2-AS1.6	-0.2745	0.22	0.987196	1.56846	2.52837
T033555	CAT191	-0.2772	0.22	0.987196	2.18524	4.18428
T144961	CAT1922.2	-0.282	0.22	0.987196	6.52833	12.6398
T129438	HNCAT99	0.2488	0.22	0.987196	97.9493	158.374
T287319	STARD4-AS1	-0.2447	0.22	0.987196	33.4924	46.7199
T316296	THCAT336	-0.2723	0.22	0.987196	11.4574	19.8936
T149628	HICLINC345.1	-0.2645	0.22	0.987196	3.61918	6.37447
T251082	CAT452	-0.2372	0.23	0.987196	23.4731	31.6375
T376385	JPX.1	-0.2416	0.23	0.987196	42.0383	59.6105
T002865	CAT16	-0.2591	0.23	0.987196	125.364	190.404
T282884	LSCAT279	-0.2309	0.23	0.987196	5.96389	9.40467
T140017	LGAT2	-0.2586	0.23	0.987196	4.28366	5.91762
T062414	THCAT620	-0.2641	0.23	0.987196	104.924	159.916
T059015	KCCAT328	-0.2587	0.23	0.987196	13.519	43.8974
T284974	CAT683	0.2613	0.23	0.987196	1.933	4.60272
T202907	CAT326	-0.2569	0.23	0.987196	38.3047	51.4726
T300985	CMAT30	0.2256	0.23	0.987196	4.9008	7.91574
T144726	CAT1919	0.2477	0.23	0.987196	123.698	193.467
T178407	KCCAT476	0.2481	0.23	0.987196	29.5746	57.5971
T203798	TTN-AS1.5	-0.2834	0.23	0.987196	5.30834	9.82517
T257703	TMEM44-AS1.3	0.253	0.23	0.987196	11.7214	24.6333
T115989	CAT1736.2	-0.2817	0.23	0.987196	40.2646	57.7178
T136805	PRCAT47.2	0.2468	0.23	0.987196	2.13209	4.5415
T287338	EPB41L4A-AS1.2	-0.2635	0.23	0.987196	8.24827	13.5998
T306331	CAT821.2	-0.2453	0.23	0.987196	70.8742	99.9861
T262417	ESAT58	-0.282	0.23	0.987196	1.43182	2.748
T100138	CAT1636.2	0.2569	0.23	0.987196	2.33135	12.4889
T260537	THCAT70.2	-0.2993	0.23	0.987196	6.94558	9.27172
T144378	CAT1916	0.2415	0.23	0.987196	44.9457	68.2392
T234605	CAT2254.2	-0.2497	0.23	0.987196	52.3241	90.0277
T086856	CAT1572	0.2634	0.23	0.987196	12.9849	120.406
T129652	CAT1836	0.2688	0.23	0.987196	5.49955	14.4496
T260557	CAT511.1	-0.2657	0.23	0.987196	15.6637	27.9326
T123753	KCCAT2	0.2413	0.24	0.987196	36.2775	54.8649
T205505	SATB2-AS1.1	-0.28	0.24	0.987196	33.4201	168.019
T128529	CAT1827	-0.2588	0.24	0.987196	5.88099	9.55577
T038491	CAT1242.2	0.246	0.24	0.987196	6.32863	15.0963
T125480	KCCAT401	0.2368	0.24	0.987196	4.52902	6.66406
T243808	ESRG.1	0.2593	0.24	0.987196	135.889	454.313
T158207	LINC00668.2	0.2391	0.24	0.987196	92.913	154.214
T238557	FGD5-AS1.3	-0.2733	0.24	0.987196	230.412	252.559
T339793	AMAT102	-0.2306	0.24	0.987196	12.641	27.7279
T344191	CAT1044	-0.2469	0.24	0.987196	43.7185	65.7624
T359953	CAT1147.3	-0.2674	0.24	0.987196	95.8869	145.106
T040565	CAT1252	-0.262	0.24	0.987196	2.1848	3.72806
T361120	CAT1158	-0.2377	0.24	0.987196	82.8775	114.472
T351096	CAT1096	0.2389	0.24	0.987196	10.7915	14.7604
T189081	THCAT323	-0.265	0.24	0.987196	2.83436	4.78031
T365328	CAT1185	-0.257	0.24	0.987196	12.1328	27.5356
T043258	MEAT112	0.2356	0.24	0.987196	5.79901	11.2691
T207351	CAT368.1	-0.2329	0.24	0.987196	53.0373	79.6664
T036334	CAT1223	0.226	0.24	0.987196	6.64007	14.8858
T343740	CAT1039	-0.2262	0.24	0.987196	31.0096	71.7483
T237325	CAT382	-0.247	0.24	0.987196	1.82793	3.51813
T047666	KCCAT369	-0.2439	0.24	0.987196	34.3799	53.5409
T106670	CAT1683.2	-0.2445	0.24	0.987196	261.177	339.769
T217678	THCAT240	-0.2395	0.24	0.987196	12.8194	25.2672
T188056	CAT234.2	-0.2727	0.24	0.987196	108.073	150.268
T102471	CAT1648	-0.237	0.24	0.987196	15.7068	22.9891
T005702	CAT28.2	-0.2489	0.24	0.987196	193.006	252.2
T309673	TRAF3IP2-AS1.2	0.2513	0.24	0.987196	3.78372	10.4928
T173769	MBAT15	0.2295	0.25	0.987196	99.2006	158.435
T322118	CAT932.1	-0.2449	0.25	0.987196	2.07862	3.32028
T174167	LGAT4	-0.2637	0.25	0.987196	2.71559	5.4634
T311009	KCCAT565	-0.2456	0.25	0.987196	5.44533	11.9907
T283690	CAT670	-0.2409	0.25	0.987196	14.6537	19.7396
T362063	CMAT35	-0.266	0.25	0.987196	8.62528	16.4658
T083975	CAT1558	-0.2532	0.25	0.987196	6.84743	15.2384
T048821	BRCAT380	-0.2488	0.25	0.987196	50.297	81.0855
T294905	CAT753	-0.2254	0.25	0.987196	21.2045	30.8365
T284856	CAT681	-0.2442	0.25	0.987196	1446.54	1924.72
T200157	MPAT6	-0.272	0.25	0.987196	1.61265	2.81452
T130003	KPCAT16	-0.253	0.25	0.987196	23.4689	37.279
T148265	BRCAT375	-0.2484	0.25	0.987196	3.41647	8.6698
T107172	CAT1689	0.2358	0.25	0.987196	16.3158	26.9461
T031800	PRCAT160	-0.2622	0.25	0.987196	5.86624	9.47062
T116847	CAT1746	-0.226	0.25	0.987196	14.1102	22.7206
T030047	AMAT88	-0.2336	0.25	0.987196	13.9646	20.243
T071211	CAT1451.2	-0.2447	0.25	0.987196	15.6636	25.012
T232422	OVAT57	-0.2453	0.25	0.987196	3.81158	6.2632
T139444	MIR22HG.1	-0.2302	0.25	0.987196	128.607	148.894
T152680	CAT1967.2	-0.2634	0.25	0.987196	11.7953	18.7887
T334324	KCCAT200	-0.241	0.25	0.987196	10.3939	20.4174
T196775	MIR4435-1HG.5	-0.2431	0.25	0.987196	4.74704	14.3878
T119136	THCAT451	0.268	0.25	0.987196	6.69567	8.81568
T009559	KDM4A-AS1.1	0.2405	0.25	0.987196	1.68775	3.27326
T151102	CAT1956.1	-0.288	0.25	0.987196	8.0155	12.3004
T037127	CAT1228	-0.2261	0.25	0.987196	13.1888	21.5993
T136581	HICLINC337	-0.2645	0.25	0.987196	3.86601	9.44841
T231786	KHCAT171	-0.2426	0.26	0.987196	10.2718	18.1813
T128248	MEAT101.2	-0.2563	0.26	0.987196	71.0142	117.78
T045664	NUTM2A-AS1.1	-0.2386	0.26	0.987196	6.9245	11.2332
T031878	MBAT102	-0.22	0.26	0.987196	34.9322	50.4798
T252688	MBNL1-AS1.1	-0.2322	0.26	0.987196	12.6589	20.4428
T380633	THCAT368	-0.2579	0.26	0.987196	12.2185	21.2377
T120518	KCCAT341	-0.235	0.26	0.987196	10.2898	18.3734
T045739	AMAT22	-0.2327	0.26	0.987196	10.9949	16.7266
T034887	CAT196	0.2413	0.26	0.987196	53.6118	81.229
T249270	CAT439	-0.2483	0.26	0.987196	22.011	39.0837
T305926	CAT819.3	-0.2518	0.26	0.987196	41.1426	62.1951
T226889	THCAT440	0.2303	0.26	0.987196	7.13485	16.3117
T039115	ESAT116.1	0.2337	0.26	0.987196	79.3316	108.218
T098602	LINC00460.1	-0.2429	0.26	0.987196	12.2676	39.2854
T244603	CAT416.1	-0.235	0.26	0.987196	1.78124	3.99788
T005327	HNCAT116	-0.2245	0.26	0.987196	33.0351	68.9306
T145773	HNCAT115	0.241	0.26	0.987196	1.71505	3.51966
T351196	CAT1097.2	-0.2559	0.26	0.987196	14.1217	28.7094
T024450	CRAT15	-0.253	0.26	0.987196	46.0784	71.5235
T257649	LINC00884.1	0.2352	0.26	0.987196	13.9787	30.1254
T263840	CAT538	-0.233	0.26	0.987196	13.3553	21.7866
T261682	AMAT47	-0.2388	0.26	0.987196	8.5691	13.0755
T027825	CAT149.2	-0.2339	0.26	0.987196	61.6137	93.8718
T314379	CAT885.3	-0.2446	0.26	0.987196	14.277	23.5406
T182499	HNCAT3.2	0.245	0.26	0.987196	44.0823	111.606
T189916	CAT243	-0.2201	0.26	0.987196	9.81695	14.354
T257476	KHCAT450	0.2405	0.26	0.987196	35.2099	50.4251
T348773	CAT1076.1	0.2241	0.27	0.987196	4.46641	8.09918
T334335	JHDM1D-AS1	-0.2264	0.27	0.987196	491.499	619.544
T261712	KCCAT215	-0.2058	0.27	0.987196	52.439	75.1796
T027332	CAT146	-0.2282	0.27	0.987196	121.17	158.11
T154385	CAT1981	-0.2379	0.27	0.987196	3.25354	5.52931
T078418	AMAT99	-0.2391	0.27	0.987196	18.4468	33.5352
T232879	KCCAT594	-0.2333	0.27	0.987196	125.782	238.715
T151445	BZRAP1-AS1.2	-0.2326	0.27	0.987196	170.278	488.017
T233440	CAT2245	-0.254	0.27	0.987196	5.91626	10.9326
T312042	CAT866.2	-0.2462	0.27	0.987196	6.24299	13.7273
T259325	CTBP1-AS2.2	-0.2366	0.27	0.987196	29.7884	45.1029
T346681	CAT1057	-0.257	0.27	0.987196	10.1633	24.3641
T286118	KCCAT526	-0.2289	0.27	0.987196	4.63059	7.22478
T324407	CAT941.2	0.2326	0.27	0.987196	9.26193	15.6048
T205750	CAT353.3	-0.2248	0.27	0.987196	149.344	204.386
T043181	OVAT72	-0.2356	0.27	0.987196	6.21829	10.0619
T196818	MIR4435-1HG.3	-0.2474	0.27	0.987196	178.606	234.694
T190140	ESAT114	-0.2262	0.27	0.987196	12.641	20.4693
T068019	CAT1427	-0.2367	0.27	0.987196	11.9923	17.6685
T320580	HOXA11-AS.2	-0.2421	0.27	0.987196	55.9061	82.9003
T208906	THCAT520	-0.229	0.27	0.987196	85.8713	151.528
T129952	CAT1841.3	0.2441	0.27	0.987196	838.434	1258.34
T037129	AMAT142	-0.26	0.27	0.987196	1.98867	2.79346
T280605	KCCAT568	-0.2275	0.27	0.987196	5.6689	9.55547
T274723	LACAT254	-0.2625	0.27	0.987196	4.45723	7.04601
T354706	CAT1125.4	-0.2437	0.27	0.987196	8.34383	14.7734
T344583	CAT1049.1	-0.25	0.27	0.987196	9.79021	16.8678
T019989	CAT107	-0.2554	0.28	0.987196	1.53368	2.61071
T168481	CAT2063.2	-0.226	0.28	0.987196	11.363	23.4065
T013531	AMAT40	-0.2126	0.28	0.987196	32.112	44.9177
T206046	CAT354	-0.2244	0.28	0.987196	93.8532	136.654
T250319	H1FX-AS1.1	0.2431	0.28	0.987196	173.982	231.285
T118026	AMAT119	-0.2549	0.28	0.987196	2.37828	3.7772
T182391	UTAT8.1	-0.2293	0.28	0.987196	37.3106	56.5967
T028931	CAT156	-0.2419	0.28	0.987196	9.39626	13.3066
T180242	MBAT100	-0.247	0.28	0.987196	34.9787	101.502
T051889	CAT1322	0.2291	0.28	0.987196	287.607	406.691
T030354	CAT164	-0.2264	0.28	0.987196	9.03679	14.2859
T376712	CAT2291	-0.2192	0.28	0.987196	10.9319	16.5136
T012887	GNG12-AS1.2	-0.2434	0.28	0.987196	3.53669	7.31959
T193598	THCAT592	-0.2377	0.28	0.987196	15.7719	23.0556
T021364	CAT116.1	-0.2521	0.28	0.987196	0.970999	1.9022
T269148	CAT579	-0.2095	0.28	0.987196	19.1118	34.3626
T256697	BRCAT378	-0.2292	0.28	0.987196	11.763	25.2673
T281636	CAT655.2	-0.2331	0.28	0.987196	67.9671	108.56
T101136	CAT1642	-0.2493	0.28	0.987196	9.16302	13.504
T076646	CAT1494	-0.2218	0.28	0.987196	29.3083	45.0772
T115021	KHCAT15	-0.2392	0.28	0.987196	11.6665	18.8829
T354381	KHCAT165	-0.2288	0.28	0.987196	14.9627	26.1378
T291896	THCAT212	-0.2225	0.28	0.987196	12.2185	23.8023
T360248	PRCAT207	0.249	0.28	0.987196	11.9601	18.6374
T154311	CAT1980	-0.2326	0.28	0.987196	21.3737	31.3426
T133112	CAT1861	-0.2214	0.28	0.987196	7.89167	13.5367
T158356	KCCAT29	-0.2302	0.28	0.987196	8.80422	17.5276
T313035	CAT877	-0.2305	0.28	0.987196	6.4224	8.61423
T076274	DDX11-AS1.3	-0.2452	0.28	0.987196	6.60268	10.9034
T292545	BRCAT138	-0.2597	0.28	0.987196	2.54706	4.3396
T238488	HRAT84	-0.2169	0.29	0.987196	2.3105	4.23304
T215910	OVAT30	0.2209	0.29	0.987196	74.4859	148.059
T037820	CAT1235.1	-0.2103	0.29	0.987196	425.474	578.474
T174866	MEAT110	-0.2268	0.29	0.987196	8.24444	12.5787
T239838	AMAT72	-0.2346	0.29	0.987196	4.19924	6.82311
T094535	CAT1611	-0.2252	0.29	0.987196	3.23937	6.48727
T038943	WAC-AS1	-0.2353	0.29	0.987196	62.4212	111.432
T096077	BRCAT357	-0.2054	0.29	0.987196	40.7035	65.1983
T349396	CAT1083	-0.2337	0.29	0.987196	17.3133	28.3592
T113567	BRCAT418	-0.2373	0.29	0.987196	2.58978	4.11576
T006269	MEAT152	-0.226	0.29	0.987196	5.51168	8.39603
T122143	PRCAT314	0.2576	0.29	0.987196	10.0707	13.5574
T152322	CAT1964.2	-0.2129	0.29	0.987196	340.936	551.417
T041025	KCCAT251	-0.2206	0.29	0.987196	11.9658	16.4956
T073381	LINC00987	-0.219	0.29	0.987196	10.1977	13.6735
T087152	AMAT48	-0.2118	0.29	0.987196	8.63886	14.4746
T334121	BRCAT361	-0.236	0.29	0.987196	5.41691	9.22186
T064932	CVAT22	-0.253	0.29	0.987196	2.55101	4.60636
T171884	KHCAT159	-0.2175	0.29	0.987196	11.5669	32.4735
T196582	CAT288.2	-0.2224	0.29	0.987196	18.5171	26.1935
T055917	NAV2-AS1	-0.2101	0.29	0.987196	35.9012	55.4627
T027939	IPO9-AS1	-0.2423	0.29	0.987196	12.9575	19.5623
T085771	CAT1567	-0.2259	0.3	0.987196	4.04922	5.77565
T213034	OVAT23	0.2062	0.3	0.987196	54.2765	90.0791
T377770	BRCAT300	-0.2258	0.3	0.987196	8.48252	18.5699
T243100	CAT407.1	-0.2364	0.3	0.987196	70.5718	107.124
T207123	CAT365	0.2117	0.3	0.987196	4.89625	8.66997
T137640	FENDRR.2	-0.224	0.3	0.987196	39.7959	48.8928
T159306	HNCAT218.2	-0.2298	0.3	0.987196	5.74952	13.7825
T002777	CAT13.1	0.2104	0.3	0.987196	2.48281	3.55432
T002775	CAT13.2	0.2104	0.3	0.987196	2.48281	3.55432
T366746	CAT1197	0.2059	0.3	0.987196	11.8301	20.5247
T231158	CAT2230	-0.2368	0.3	0.987196	7.02195	13.9211
T038688	CAT1244	-0.209	0.3	0.987196	4.81828	12.1723
T299371	KCCAT524	-0.2129	0.3	0.987196	8.6573	17.2634
T034491	CAT194.2	-0.2269	0.3	0.987196	4.11871	11.7044
T307133	LVCAT66	-0.239	0.3	0.987196	7.67415	11.1642
T343020	THCAT222	-0.2333	0.3	0.987196	3.22495	5.07246
T218748	HNCAT13	-0.1919	0.3	0.987196	78.9915	147.392
T063075	CAT1388.2	-0.2355	0.3	0.987196	21.7655	39.167
T208775	CAT372.1	-0.237	0.3	0.987196	3.86142	8.11716
T063059	CAT1387	-0.2192	0.3	0.987196	6.97073	9.97194
T054687	SBF2-AS1.6	-0.2334	0.3	0.987196	6.77647	15.7428
T262691	KCCAT175	-0.2378	0.3	0.987196	3.72974	8.32716
T150343	CAT1951	-0.225	0.3	0.987196	3.76257	8.14048
T341364	AMAT56	-0.2192	0.3	0.987196	11.9206	19.8979
T247074	KHCAT325	-0.1994	0.3	0.987196	33.9437	49.5719
T351184	CAT1097.4	-0.2528	0.3	0.987196	5.04314	11.7653
T223863	CAT2194	-0.222	0.3	0.987196	117.116	204.81
T263264	CAT534	-0.2226	0.3	0.987196	5.6064	13.0613
T088840	CAT1578	-0.2439	0.3	0.987196	2.41209	4.43995
T248583	HICLINC91.2	-0.2282	0.3	0.987196	5.51168	13.6051
T018350	CAT97.1	0.2089	0.31	0.987196	17.2003	27.6491
T115221	KCCAT441	-0.2153	0.31	0.987196	45.3006	73.806
T044900	OVAT44	-0.2177	0.31	0.987196	24.1428	31.8212
T307745	CAT837	-0.2002	0.31	0.987196	251.564	383.14
T351663	CAT1101.1	-0.2249	0.31	0.987196	2.54706	6.41809
T036710	PRKCQ-AS1.3	-0.2186	0.31	0.987196	40.8603	49.3868
T186847	KCCAT574	-0.1988	0.31	0.987196	15.4302	25.5115
T093641	CAT1604.1	-0.2031	0.31	0.987196	7.24157	13.9223
T010079	CAT42.2	-0.2339	0.31	0.987196	2.28364	4.35767
T238556	FGD5-AS1.2	-0.2195	0.31	0.987196	1628.26	2295.39
T180581	CAT2130	-0.2154	0.31	0.987196	187.923	264.032
T374409	KCCAT31	-0.2103	0.31	0.987196	45.0031	66.137
T011686	CAT56	-0.203	0.31	0.987196	12.4986	30.9645
T137233	CAT1879	-0.2068	0.31	0.987196	41.9296	72.6783
T263735	CAT537	-0.1973	0.31	0.987196	67.4233	108.7
T101759	UTAT29	-0.2051	0.31	0.987196	17.0471	26.4171
T321689	CAT926	-0.2297	0.31	0.987196	42.0853	137.544
T022094	RUSC1-AS1.1	-0.2227	0.31	0.987196	509.467	705.733
T013619	AMAT58	-0.2131	0.31	0.987196	7.71467	16.2111
T134020	ESAT109	-0.213	0.31	0.987196	703.805	999.872
T003930	BRCAT238	0.2135	0.31	0.987196	58.3659	109.117
T152911	KCCAT156	0.2056	0.31	0.987196	8.9167	17.2688
T231759	MBAT63	-0.2207	0.31	0.987196	5.98149	10.0373
T374161	UXT-AS1	0.2122	0.31	0.987196	138.222	193.704
T342254	THCAT322	-0.2319	0.31	0.987196	2.72081	4.96424
T177112	CAT2111	0.2108	0.31	0.987196	27.8551	39.633
T185011	CAT214	-0.2054	0.31	0.987196	21.8299	49.9035
T305490	CAT817.2	0.218	0.31	0.987196	3.48965	5.93342
T219713	CAT2180.3	-0.2124	0.31	0.987196	57.442	80.1773
T099945	KCCAT513.1	0.2036	0.31	0.987196	3.31249	6.44845
T152410	THCAT157	-0.2079	0.31	0.987196	21.3737	29.8046
T378692	CAT2304	-0.214	0.31	0.987196	5.89437	7.60959
T074191	THCAT437	-0.2124	0.31	0.987196	38.6618	74.5047
T165602	CAT2043	-0.226	0.31	0.987196	6.66589	9.04442
T307028	CAT827.3	-0.2396	0.31	0.987196	2.29004	6.65058
T237820	PRRT3-AS1	0.2156	0.31	0.987196	44.4905	60.1679
T225913	CAT2209	-0.249	0.31	0.987196	3.36315	5.24871
T032673	CAT185.2	-0.2464	0.31	0.987196	8.39681	17.3882
T084303	CAT1561	0.2257	0.31	0.987196	4.05853	8.93277
T205780	CFLAR-AS1.2	-0.2048	0.31	0.987196	10.6292	15.6357
T273666	KHCAT18	-0.2009	0.31	0.987196	13.0567	24.9746
T318665	KCCAT407	-0.2244	0.31	0.987196	5.09411	10.1811
T205376	CAT350	-0.1985	0.32	0.987196	31.5267	41.3773
T226169	CAT2212	-0.23	0.32	0.987196	5.53871	13.891
T329662	THCAT197	-0.2381	0.32	0.987196	2.72066	4.8484
T032282	CMAT33	0.2134	0.32	0.987196	5.65926	8.97132
T139635	CAT1894	0.2224	0.32	0.987196	24.4153	33.4705
T347199	CAT1060	-0.2193	0.32	0.987196	1.98454	3.66967
T018075	KCCAT128.2	-0.2057	0.32	0.987196	33.8989	59.9543
T363533	MPAT12	-0.197	0.32	0.987196	31.5966	52.4115
T062236	CAT1378.1	0.219	0.32	0.987196	2.013	5.60223
T321378	AMAT63	0.2137	0.32	0.987196	2.82049	4.73131
T308677	KHCAT458	-0.2149	0.32	0.987196	22.9758	30.0686
T363122	LINC00092	-0.2213	0.32	0.987196	2.44657	3.64448
T153639	LSCAT59.2	-0.232	0.32	0.987196	9.6256	19.7625
T020995	CAT112.2	-0.2097	0.32	0.987196	21.0383	29.1442
T024433	CAT132	-0.2056	0.32	0.987196	11.7483	30.3185
T103645	CAT1658	0.2086	0.32	0.987196	4.53468	7.20745
T021340	CAT113	-0.2431	0.32	0.987196	2.64605	5.5052
T126024	CAT1811	0.1923	0.32	0.987196	45.7844	117.668
T060610	CAT1369	-0.2117	0.32	0.987196	21.5128	30.875
T284146	THCAT297	-0.224	0.32	0.987196	7.33001	14.6172
T203095	LSCAT195	-0.2099	0.32	0.987196	25.7946	60.1041
T282175	CAT661.2	-0.2089	0.32	0.987196	19.6806	35.7403
T197657	CAT299.1	-0.2227	0.32	0.987196	1.98421	3.87034
T288160	CAT707.1	-0.2039	0.32	0.987196	12.7818	23.9055
T094678	AMAT11	-0.1992	0.32	0.987196	8.12536	13.2682
T247070	HNCAT19	-0.2217	0.32	0.987196	12.3847	15.126
T269602	KCCAT13	0.2147	0.32	0.987196	2.2932	4.26093
T231133	KCCAT319.2	-0.2131	0.32	0.987196	10.5322	19.089
T322086	AMAT74	-0.2097	0.32	0.987196	47.2499	81.3996
T234401	CAT2252	-0.2244	0.32	0.987196	197.998	315.394
T366719	CAT1196	0.2161	0.32	0.987196	55.8408	80.6009
T233088	KCCAT580	-0.2257	0.32	0.987196	6.5544	10.4873
T289937	HICLINC139	-0.2015	0.32	0.987196	18.2334	37.142
T074090	CAT1473.1	-0.2146	0.33	0.987196	15.9874	28.2822
T061273	MALAT1.2	-0.2	0.33	0.987196	3968.81	10323.4
T272951	CAT596.2	-0.2005	0.33	0.987196	17.6227	24.3754
T141182	MBAT79	-0.2044	0.33	0.987196	40.6946	51.7018
T158208	LINC00668.1	0.2046	0.33	0.987196	75.6321	122.55
T169449	CAT2070.1	0.196	0.33	0.987196	7.93884	12.0458
T102562	OVAT89	-0.2179	0.33	0.987196	3.43141	6.08397
T004105	CMAT27	0.2013	0.33	0.987196	66.4666	139.711
T047958	CAT1299	-0.2017	0.33	0.987196	10.512	14.9489
T234216	KCCAT160	-0.211	0.33	0.987196	14.4479	22.9097
T281940	HNCAT11	-0.236	0.33	0.987196	1.81185	3.0925
T203399	HOXD-AS2.1	-0.2208	0.33	0.987196	1.85893	3.64
T196782	CAT293.2	-0.218	0.33	0.987196	3.56911	6.77021
T073684	CAT1468	-0.2059	0.33	0.987196	3.20813	5.92157
T162541	CAT2020.3	0.2064	0.33	0.987196	3.2772	4.87582
T359794	LACAT41	-0.2092	0.33	0.987196	3.54695	7.63341
T048718	CAT1303	-0.2066	0.33	0.987196	13.1911	31.7074
T252948	MME-AS1.2	-0.1924	0.33	0.987196	8.23586	41.2137
T297995	CAT775.3	-0.224	0.33	0.987196	4.67046	8.7384
T359282	BRCAT204.2	-0.2057	0.33	0.987196	2.25786	4.94766
T065337	CAT1405	-0.2041	0.33	0.987196	41.0017	54.3002
T202909	CAT327	-0.2046	0.33	0.987196	43.0257	70.8993
T188803	THCAT311	-0.2061	0.33	0.987196	4.56602	8.51782
T259280	KPCAT2.1	-0.2094	0.33	0.987196	16.0848	31.514
T347941	CAT1065.2	-0.2071	0.33	0.987196	44.6413	69.8913
T024053	CAT130.1	-0.1974	0.33	0.987196	35.5747	58.7055
T289235	CAT719	-0.202	0.33	0.987196	199.133	237.532
T257648	LINC00884.2	0.2137	0.33	0.987196	4.47844	8.67445
T134780	AMAT100	-0.2042	0.33	0.987196	9.21568	14.4878
T017160	LAMTOR5-AS1.1	-0.185	0.33	0.987196	12.3096	21.3662
T226977	CAT2214	-0.224	0.33	0.987196	3.41647	6.22841
T342079	CAT1023.2	-0.2175	0.33	0.987196	285.586	854.895
T058448	KHCAT114	-0.204	0.33	0.987196	9.28045	20.7262
T195386	AMAT28	-0.1983	0.33	0.987196	21.1306	33.7875
T162059	HNCAT132	-0.2046	0.33	0.987196	6.6838	13.2535
T183196	PRCAT62	-0.2261	0.33	0.987196	2.33135	3.87032
T375185	CAT2283.1	-0.2017	0.33	0.987196	85.1101	125.258
T111511	KCCAT61	0.1939	0.33	0.987196	151.584	223.609
T085194	KCCAT423	-0.1906	0.33	0.987196	84.5093	151.585
T219714	CAT2180.4	-0.2026	0.33	0.987196	13.3786	20.6307
T065383	CAT1406.2	-0.2018	0.33	0.987196	16.5277	28.8648
T196812	CAT296.2	-0.2161	0.33	0.987196	10.2733	14.9715
T093525	PRCAT262	-0.2208	0.33	0.987196	18.2381	30.9331
T004758	BRCAT395	0.2206	0.33	0.987196	46.4212	76.5147
T081323	OVAT81	-0.2015	0.33	0.987196	5.43044	9.44635
T059852	CAT1362.3	-0.2202	0.33	0.987196	39.7656	80.9238
T336822	CAT998	-0.2234	0.34	0.987196	7.07893	14.1886
T008165	THCAT20	-0.1995	0.34	0.987196	83.7189	115.395
T063691	CAT1392	-0.2216	0.34	0.987196	21.9898	35.9593
T315265	KCCAT240.1	-0.2002	0.34	0.987196	14.4637	31.3106
T250339	LACAT211	0.2068	0.34	0.987196	1.32303	2.57145
T353735	CAT1119	-0.2288	0.34	0.987196	5.87974	9.87289
T033422	MEAT144	0.2193	0.34	0.987196	10.3649	64.0848
T266790	CAT563	-0.216	0.34	0.987196	16.1969	33.3576
T074432	CAT1477.1	-0.1929	0.34	0.987196	9.80541	16.2723
T175094	CAT2101.1	-0.2061	0.34	0.987196	6.06693	23.6507
T043739	CAT1275	-0.2172	0.34	0.987196	2.48437	5.06194
T320359	HRAT26	-0.2013	0.34	0.987196	25.2973	45.5377
T242348	CAT403.1	-0.203	0.34	0.987196	118.345	159.945
T347611	CAT1062.2	-0.2	0.34	0.987196	296.776	435.927
T128814	CAT1828	-0.1896	0.34	0.987196	72.9222	135.017
T189074	CAT238	-0.1953	0.34	0.987196	26.8442	39.9765
T110528	DIO3OS.2	-0.1956	0.34	0.987196	30.522	70.7348
T216008	BRCAT112	-0.2207	0.34	0.987196	4.83659	12.0202
T278900	CAT644	-0.215	0.34	0.987196	20.3183	27.4902
T009267	LSCAT124	-0.1998	0.34	0.987196	2.61991	7.41224
T162796	PNAT104	-0.2285	0.34	0.987196	5.38518	11.2568
T066397	KCCAT234	-0.203	0.34	0.987196	5.44533	10.0504
T167059	CAT2052	-0.2078	0.34	0.987196	151.808	252.315
T084828	CAT1563	0.1993	0.34	0.987196	3.62787	7.49074
T022089	CAT119	-0.2066	0.34	0.987196	262.596	344.318
T072475	CD27-AS1.1	0.1936	0.34	0.987196	16.0027	23.9379
T298260	THCAT337	-0.218	0.34	0.987196	1.49486	3.12245
T294365	KCCAT41	-0.2029	0.34	0.987196	6.1644	8.95081
T266622	CAT559.1	-0.2046	0.34	0.987196	28.5829	63.2899
T371720	CAT2274	-0.231	0.34	0.987196	7.51445	33.2248
T066452	CAT1418.1	-0.2059	0.34	0.987196	16.7821	31.397
T196014	UTAT33	0.213	0.34	0.987196	56.0274	89.5545
T094824	CAT1616.1	-0.1887	0.34	0.987196	26.42	47.8545
T252422	THCAT508	0.1894	0.34	0.987196	4.1981	6.38909
T283074	HICLINC118	-0.2382	0.34	0.987196	4.37048	6.5085
T175914	CAT2106.2	-0.2216	0.35	0.987196	8.40618	20.1405
T295238	LINC00847.1	-0.2096	0.35	0.987196	138.487	187.528
T139868	PRCAT284	0.2166	0.35	0.987196	3.82059	6.22924
T105115	CAT1671	-0.2232	0.35	0.987196	2.00746	2.91356
T263701	UGDH-AS1.1	-0.1959	0.35	0.987196	32.0596	38.4967
T033010	MEAT143	0.2004	0.35	0.987196	6.34147	10.4522
T188538	KHCAT367	0.1972	0.35	0.987196	43.2345	58.8889
T314150	AMAT16	-0.1839	0.35	0.987196	13.6346	22.2985
T243432	KHCAT23	-0.2024	0.35	0.987196	20.2621	27.587
T211285	PNAT34	0.1816	0.35	0.987196	270.431	401.619
T066414	CAT1417	-0.1954	0.35	0.987196	303.1	411.109
T254318	OVAT174	-0.2237	0.35	0.987196	2.31023	6.44755
T044199	CAT1278	-0.2079	0.35	0.987196	8.97764	19.3644
T072402	CAT1464	-0.1812	0.35	0.987196	178.609	276.891
T064507	KCCAT556	-0.1953	0.35	0.987196	11.3485	24.6793
T076268	DDX11-AS1.1	-0.2188	0.35	0.987196	5.21011	9.3076
T020857	GBAT2	-0.2031	0.35	0.987196	3.64207	4.9053
T208670	CAT370	-0.1953	0.35	0.987196	25.947	35.5066
T284899	CAT682.2	-0.1893	0.35	0.987196	59.6669	81.96
T239183	GBAT8	-0.1926	0.35	0.987196	37.4302	53.1381
T133105	KCCAT81	-0.2061	0.35	0.987196	11.5332	23.327
T027091	THCAT421	-0.2161	0.35	0.987196	2.30108	5.44054
T332760	KCCAT6	-0.2112	0.35	0.987196	18.7963	35.0095
T077372	CAT1501.3	-0.1887	0.35	0.987196	333.652	521.663
T056311	CAT1345.5	0.2034	0.35	0.987196	7.93851	18.2768
T203141	CAT335	0.1901	0.35	0.987196	3.60742	6.89494
T256375	LSCAT140	-0.2142	0.35	0.987196	4.67191	10.8283
T200383	CAT314	-0.1876	0.36	0.987196	13.1366	24.9989
T110327	MEG3.2	-0.186	0.36	0.987196	6.38174	12.0754
T066031	CAT1412	-0.1987	0.36	0.987196	10.4257	14.6925
T105518	KCCAT387	-0.196	0.36	0.987196	15.439	21.3436
T021357	CAT114.1	-0.2085	0.36	0.987196	5.51786	8.75027
T068457	CAT1433.1	-0.1934	0.36	0.987196	354.746	462.453
T005622	KCCAT477	-0.1828	0.36	0.987196	56.0144	106.635
T330887	AMAT43	-0.186	0.36	0.987196	4.83251	9.84377
T165229	BRCAT57	-0.192	0.36	0.987196	5.7852	9.25699
T318841	CAT905	0.192	0.36	0.987196	3.81173	5.84941
T274242	THCAT519	-0.195	0.36	0.987196	6.42438	10.6218
T044194	CAT1277	-0.1921	0.36	0.987196	9.12694	15.5988
T139937	CAT1896.2	-0.1876	0.36	0.987196	24.8987	40.4699
T042079	LACAT267	-0.2	0.36	0.987196	4.12222	6.70118
T125980	BRCAT132	-0.1839	0.36	0.987196	32.2119	58.7694
T278794	SNHG18.1	-0.2027	0.36	0.987196	78.7544	121.795
T073870	KCCAT388	0.2032	0.36	0.987196	2.51657	15.0882
T166624	KCCAT139	-0.19	0.36	0.987196	17.4784	29.8908
T137479	CAT1882	0.1837	0.36	0.987196	3.80502	7.37051
T006598	SNHG12.4	-0.2127	0.36	0.987196	30.7271	48.5779
T241166	CAT401.2	-0.1865	0.36	0.987196	78.8707	111.155
T150923	CAT1954.1	-0.1956	0.36	0.987196	5.14737	11.3159
T158216	LINC00668.3	0.194	0.36	0.987196	219.951	296.528
T086185	FAM222A-AS1.3	0.2101	0.36	0.987196	17.2349	36.9483
T250746	KCCAT282	-0.195	0.36	0.987196	4.99942	6.73564
T275639	KHCAT184	-0.1746	0.36	0.987196	17.4646	30.0938
T111204	CAT1707	0.2081	0.36	0.987196	25.6661	33.1367
T017591	KCCAT16.1	-0.2043	0.36	0.987196	18.3262	36.6801
T214237	THCAT502	-0.1959	0.36	0.987196	3.10324	5.54813
T157483	MBAT73	-0.1866	0.36	0.987196	26.5474	42.4227
T107194	CRAT24	-0.1959	0.36	0.987196	17.481	20.1504
T194169	CAT275	0.1953	0.36	0.987196	29.0682	43.2194
T127898	CAT1823	-0.1715	0.37	0.987196	10.12	28.1479
T209379	CAT375.1	-0.1986	0.37	0.987196	5.12706	9.61972
T031976	MBAT57	0.1876	0.37	0.987196	14.3887	26.5316
T081158	AMAT46	-0.1751	0.37	0.987196	22.9235	33.9616
T186247	DNAJC27-AS1.1	-0.19	0.37	0.987196	3.74882	5.77174
T222083	CAT2190	0.186	0.37	0.987196	91.3345	163.232
T322202	INHBA-AS1	-0.1913	0.37	0.987196	4.9008	9.76556
T118493	IQCH-AS1	-0.2105	0.37	0.987196	11.1196	27.9664
T268443	CAT576	0.1948	0.37	0.987196	2.06334	3.39463
T132766	CRNDE.1	-0.1915	0.37	0.987196	46.0257	93.0491
T178870	CAT2122	0.1931	0.37	0.987196	48.4566	81.3167
T281107	MBAT112	-0.1852	0.37	0.987196	20.2834	38.9035
T283345	BRCAT52	-0.201	0.37	0.987196	10.0213	19.75
T335007	CAT990	-0.186	0.37	0.987196	4.52962	11.9162
T223669	OVAT8	-0.1997	0.37	0.987196	2.62019	5.20326
T351178	CAT1097.3	-0.2087	0.37	0.987196	17.0876	43.2643
T091002	CAT1585	-0.1909	0.37	0.987196	19.9429	27.7895
T006713	CAT30	-0.1798	0.37	0.987196	120.409	208.89
T053647	KHCAT47	-0.2171	0.37	0.987196	2.57996	3.51415
T077992	CAT1506	-0.1962	0.37	0.987196	2.14298	5.13028
T047479	CAT1295.2	-0.1845	0.37	0.987196	24.4277	39.1806
T275277	CAT613.1	0.1866	0.37	0.987196	7.74333	17.9331
T287735	LINC00992.2	-0.191	0.37	0.987196	34.6294	59.1192
T151419	BZRAP1-AS1.1	-0.1784	0.37	0.987196	138.912	300.56
T175844	CAT2105	-0.1889	0.37	0.987196	6.10652	10.3565
T356413	KCCAT392	-0.1795	0.37	0.987196	21.4887	33.3902
T079226	KCCAT297	-0.1894	0.37	0.987196	13.0996	16.6646
T062673	CAT1381	0.197	0.37	0.987196	53.5213	81.8242
T356625	CAT1137	-0.2036	0.37	0.987196	2.54706	4.25914
T225716	HNCAT227	-0.1982	0.37	0.987196	12.0458	18.3424
T188905	BRCAT335	-0.2007	0.37	0.987196	2.43774	3.57671
T284980	CKMT2-AS1.1	-0.1978	0.37	0.987196	4.86124	8.81723
T143570	CAT1914	-0.1883	0.37	0.987196	113.231	161.605
T012264	CAT59	-0.1768	0.37	0.987196	17.0822	23.6132
T055745	CAT1341	-0.1836	0.37	0.987196	53.9347	73.3409
T266977	CAT567	-0.172	0.37	0.987196	16.0534	24.5608
T278796	SNHG18.2	-0.1877	0.37	0.987196	376.016	560.239
T013953	CAT72	-0.2218	0.37	0.987196	8.65388	20.7064
T288594	CAT710	-0.1932	0.37	0.987196	43.6992	59.3156
T125740	CAT1810.2	-0.1888	0.37	0.987196	26.5984	50.9846
T203065	MLK7-AS1	-0.1868	0.37	0.987196	29.7018	52.8861
T130156	CAT1844	-0.1826	0.38	0.987196	12.4757	17.4459
T241117	SNRK-AS1	-0.1839	0.38	0.987196	36.9848	46.4574
T216399	OVAT87	0.1796	0.38	0.987196	9.19854	30.263
T307687	CAT836	-0.1795	0.38	0.987196	5.62821	11.0372
T082905	LSCAT260	-0.2063	0.38	0.987196	1.64445	5.58047
T148546	MEAT128	-0.1822	0.38	0.987196	15.5667	23.0403
T081547	AMAT29	-0.1741	0.38	0.987196	72.1502	117.465
T135024	CAT1868	-0.1839	0.38	0.987196	31.9087	57.2814
T171030	THCAT615	-0.189	0.38	0.987196	7.99495	19.0355
T230111	CMAT15	-0.2103	0.38	0.987196	9.05803	16.7287
T128190	CAT1825	-0.1788	0.38	0.987196	417.2	655.482
T226590	PRCAT17.1	-0.1969	0.38	0.987196	29.0461	42.5243
T350693	LSCAT112.2	0.1878	0.38	0.987196	6.77113	13.4146
T238970	CAT391	-0.1698	0.38	0.987196	7.49913	11.2223
T349318	KPCAT14	-0.181	0.38	0.987196	18.2929	29.9841
T072776	KPCAT22	-0.185	0.38	0.987196	14.1024	23.5605
T331795	KHCAT25	-0.1972	0.38	0.987196	16.5672	28.309
T377599	KCCAT688	-0.1889	0.38	0.987196	4.38607	9.6662
T354975	KCCAT352	-0.1992	0.38	0.987196	7.29591	14.7294
T140923	THCAT444	-0.2029	0.38	0.987196	1.77847	2.58723
T337103	THCAT299	0.176	0.38	0.987196	2.57996	9.8151
T259867	KCCAT268	-0.1981	0.38	0.987196	5.49746	10.6416
T048043	KHCAT33	-0.1877	0.38	0.987196	15.4007	27.736
T127042	MPAT2	-0.1736	0.38	0.987196	633.392	925.566
T026522	CAT145	0.1863	0.38	0.987196	2.65179	4.77885
T187220	CAT224.2	-0.1801	0.38	0.987196	3.88091	4.98168
T168610	CAT2065	-0.1906	0.38	0.987196	11.777	27.2432
T072151	CRAT10.1	-0.1881	0.38	0.987196	54.694	81.9565
T106738	CAT1684.3	-0.1899	0.38	0.987196	10.0337	15.3381
T154976	KHCAT368	-0.1959	0.38	0.987196	3.1414	5.71333
T028376	PRCAT68	-0.1907	0.38	0.987196	21.191	49.1893
T174648	CAT2099	-0.202	0.38	0.987196	2.46645	10.3206
T129476	CAT1834.1	-0.1943	0.38	0.987196	6.86884	15.2909
T048756	HICLINC251.2	-0.1936	0.38	0.987196	10.8321	14.5277
T129677	AMAT131	-0.186	0.39	0.987196	2.82049	6.06753
T055152	BRCAT314	0.1846	0.39	0.987196	3.57542	6.80255
T184450	CAT211.2	-0.1941	0.39	0.987196	7.77367	10.7221
T021310	KHCAT437	0.1866	0.39	0.987196	285.384	394.643
T163295	CAT2028	-0.1785	0.39	0.987196	13.0001	17.6168
T139646	LGAT37	0.1966	0.39	0.987196	3.98375	8.09938
T055045	CAT1337.2	-0.1908	0.39	0.987196	3.33364	5.81851
T103602	MBAT114	-0.177	0.39	0.987196	44.381	58.4434
T258478	MFI2-AS1.1	-0.1901	0.39	0.987196	19.1096	27.9128
T064634	AMAT36	-0.18	0.39	0.987196	14.863	26.7142
T099580	MCF2L-AS1.2	-0.1801	0.39	0.987196	119.443	181.823
T346171	CASC9.1	0.1849	0.39	0.987196	3.56588	7.30748
T125697	CAT1809	-0.175	0.39	0.987196	18.5424	28.7194
T164773	STCAT16	0.2107	0.39	0.987196	2.49971	4.69496
T014284	CAT73	-0.1677	0.39	0.987196	19.6447	28.918
T099781	HRAT1	0.1739	0.39	0.987196	29.7676	48.9697
T127290	AMAT10	-0.1832	0.39	0.987196	25.19	41.898
T170645	THCAT469	0.1818	0.39	0.987196	5.62977	8.81104
T047626	THCAT289	-0.1676	0.39	0.987196	11.4618	20.5214
T041872	AMAT87	-0.176	0.39	0.987196	33.8354	51.1698
T157813	CAT1994	-0.1982	0.39	0.987196	3.10846	5.79007
T130508	BRCAT126	-0.1799	0.39	0.987196	13.348	29.3884
T341075	CVAT21	-0.1934	0.39	0.987196	4.03852	6.71131
T012894	GNG12-AS1.5	0.1879	0.39	0.987196	2.8196	4.34849
T087725	CAT1575.2	-0.1649	0.39	0.987196	615.91	785.262
T235551	THCAT486	-0.177	0.39	0.987196	58.5705	87.2412
T321688	KCCAT589	-0.1927	0.39	0.987196	4.12668	18.0591
T369068	CMAT34	0.1795	0.39	0.987196	8.87155	14.1521
T228945	KCCAT603	0.1826	0.39	0.987196	3.0413	5.01761
T362351	CAT1164.2	-0.1939	0.39	0.987196	1.95428	4.49083
T216448	CAT2159	-0.1829	0.39	0.987196	26.2689	46.0168
T249192	CAT438	-0.1893	0.39	0.987196	22.1376	31.7083
T166222	CAT2045.4	-0.1907	0.39	0.987196	3.88558	7.30766
T305163	TRAM2-AS1.2	-0.1857	0.39	0.987196	52.8809	67.5101
T342468	AMAT148	-0.1789	0.39	0.987196	2.75082	5.43083
T241304	ZNF197-AS1.2	-0.1901	0.39	0.987196	3.39019	4.87368
T149738	HOXB-AS2.2	-0.1814	0.39	0.987196	57.39	108.821
T126034	KCCAT35.2	0.1877	0.4	0.987196	37.2616	63.1924
T114088	MBAT29	-0.1892	0.4	0.987196	2.5717	4.4343
T166615	CAT2048	-0.1885	0.4	0.987196	11.777	18.081
T123738	KCCAT23	0.178	0.4	0.987196	27.966	53.716
T206254	OVAT10.2	-0.1757	0.4	0.987196	22.4772	32.4749
T062567	BRCAT205	0.1766	0.4	0.987196	43.1501	65.4597
T111739	CAT1709.1	-0.1759	0.4	0.987196	42.3544	56.4786
T290637	CAT726	-0.1796	0.4	0.987196	26.5579	43.7028
T162025	KHCAT34.1	0.1711	0.4	0.987196	5.13115	9.16457
T071762	CAT1457	-0.1752	0.4	0.987196	7.29916	11.634
T239000	SGOL1-AS1	-0.1886	0.4	0.987196	21.0526	30.5733
T062931	CAT1385.1	-0.1829	0.4	0.987196	85.4517	118.525
T327266	THCAT391	0.1708	0.4	0.987196	5.06002	8.302
T117821	CAT1760.2	-0.176	0.4	0.987196	351.806	617.412
T054829	ZBED5-AS1.1	-0.1722	0.4	0.987196	123.114	163.906
T190670	CAT252.1	-0.1715	0.4	0.987196	16.335	22.3004
T176611	PNAT53	-0.1817	0.4	0.987196	4.52962	6.89193
T028467	CAT153	-0.1795	0.4	0.987196	5.4144	7.26599
T328343	KHCAT66	-0.1851	0.4	0.987196	2.52914	3.72354
T245054	CAT422	-0.176	0.4	0.987196	8.42748	14.0556
T255842	CAT480.2	-0.1876	0.4	0.987196	91.4143	150.62
T198162	CAT304	-0.1796	0.4	0.987196	26.4618	37.6308
T092175	CAT1591	-0.1645	0.4	0.987196	52.9909	104.255
T312881	CRAT2	-0.1738	0.4	0.987196	246.558	312.579
T293351	CAT744.1	-0.1943	0.4	0.987196	5.66127	12.323
T358409	THCAT564	-0.1828	0.4	0.987196	7.59633	25.6822
T011405	THCAT233	-0.1832	0.4	0.987196	4.9329	8.76868
T000474	KHCAT319	0.1789	0.4	0.987196	16.6126	30.353
T169313	BRCAT393	0.1778	0.4	0.987196	387.175	677.075
T165577	GBAT5	-0.1852	0.4	0.987196	35.7034	58.3164
T325600	LINC00174	0.1746	0.4	0.987196	48.771	95.1392
T304646	BRCAT408	-0.1808	0.4	0.987196	17.8166	42.1291
T184085	KHCAT449	-0.2036	0.4	0.987196	11.2264	18.7258
T244616	ADAMTS9-AS1.4	-0.1702	0.4	0.987196	13.6638	20.3841
T126032	KCCAT35.1	0.1912	0.4	0.987196	40.4962	66.8172
T301843	HCG25.2	0.1765	0.4	0.987196	153.638	231.688
T233874	KCCAT180	-0.1866	0.4	0.987196	2.06315	3.631
T040306	BRCAT425	-0.1731	0.4	0.987196	2.10687	3.48729
T115222	KHCAT146	-0.1707	0.41	0.987196	41.084	69.6162
T347609	CAT1062.1	-0.1697	0.41	0.987196	49.1031	95.088
T006482	CAT29	-0.187	0.41	0.987196	21.7248	35.9262
T175025	CAT2100.2	0.164	0.41	0.987196	230.615	445.101
T309756	CAT850.1	-0.185	0.41	0.987196	5.23982	9.64801
T302619	AMAT37	-0.1781	0.41	0.987196	114.51	236.826
T181776	ZNF667-AS1.2	-0.1764	0.41	0.987196	5.91744	10.0633
T312896	KCCAT562	-0.1701	0.41	0.987196	17.2092	30.9395
T244790	MAGI1-AS1	-0.1726	0.41	0.987196	27.9798	45.4709
T270264	SNHG8.1	-0.178	0.41	0.987196	99.4088	275.894
T045846	ACTA2-AS1	-0.1595	0.41	0.987196	42.5529	65.6027
T052079	CAT1323	0.1624	0.41	0.987196	10.2647	46.6867
T183452	RNASEH1-AS1	-0.192	0.41	0.987196	57.6496	83.595
T274240	THCAT603	-0.1625	0.41	0.987196	10.1882	18.7496
T167577	KHCAT287	0.1716	0.41	0.987196	74.9159	109.91
T160533	CAT2009.2	-0.1633	0.41	0.987196	43.1055	67.1215
T205779	CFLAR-AS1.1	-0.1732	0.41	0.987196	12.188	16.9951
T104499	CAT1664	-0.1657	0.41	0.987196	269.052	335.803
T006282	BRCAT233	0.1818	0.41	0.987196	5.04415	13.6383
T149393	AMAT82	-0.1792	0.41	0.987196	8.18024	19.6127
T159191	KCCAT361	-0.1617	0.41	0.987196	6.5544	9.23154
T110522	DIO3OS.1	-0.1755	0.41	0.987196	53.8558	95.5927
T113580	CAT1715	-0.1738	0.41	0.987196	3.43997	5.33855
[truncated: 2,008 more rows]

## Sheet: GBM
Transcript ID	Name	Cox coefficient	Raw p-value	BH-adjusted p-value	Median Expression	Mean Expression	Cox model: coxph(Surv(times,died) ~ lncrna + sex + age)
[truncated: 4,524 more rows]

[truncated: 13 more sheets: HNSC, KIRC, KIRP, LAML, LGG, LIHC, LUAD, LUSC, OV, READ, SKCM, STAD, UCEC]
