# Supplementary material for: OncoLnc: linking TCGA survival data to mRNAs, miRNAs, and lncRNAs
Source: PeerJ journal article supplement (doi:10.7717/peerj-cs.67), 2016-06-13
Supplement: TableS4.xlsx [file TableS4.xlsx]

## Sheet: Sheet1
TCGA ID	TCGA Name	ID Replaced/Discontinued	Replacement ID	Current Name
378465	HSN2	Replaced	65125	WNK1
84127	RUNDC2A	Replaced	92017	SNX29
149469	C1orf84	Replaced	23334	SZT2
9503	XAGE1D	Replaced	653067	XAGE1E
100124692	LOC100124692	Replaced	93432	MGAM2
642265	FAM75A2	Replaced	647060	SPATA31A1
728939	PDZK1P1	Replaced	100034743	PDZK1P1
728936	NBPF16	Replaced	284565	NBPF15
728932	GPR89C	Replaced	51463	GPR89B
54070	NCRNA00159	Discontinued	NA
221016	CCDC7	Replaced	79741	CCDC7
654348	PRAMEF16	Discontinued	NA
653501	LOC653501	Replaced	401509	ZNF658B
728404	AGAP8	Replaced	119016	AGAP4
100113390	SNORD124	Discontinued	NA
10431	?	Replaced	100652748	TIMM23B
4276	MICA	Replaced	100507436	MICA
84663	CYorf15B	Replaced	246126	TXLNGY
54094	C21orf15	Replaced	54055	CYP4F29P
650662	C14orf184	Discontinued	NA
728875	LOC728875	Replaced	728855	LINC00623
100113385	SNORD121B	Discontinued	NA
55389	NCRNA00120	Discontinued	NA
51402	HSFX1	Replaced	100506164	HSFX1
4950	OCLN	Replaced	100506658	OCLN
728461	CSAG2	Replaced	102723547	CSAG2
255352	C10orf93	Replaced	54777	CFAP46
548321	FAM27A	Replaced	100132948	FAM27C
79614	C5orf23	Replaced	4883	NPR3
8475	EPR1	Discontinued	NA
83954	FKSG83	Replaced	387316	VN1R10P
100133144	?	Replaced	100134869	UBE2Q2P2
339010	POTEB	Replaced	102724631	POTEB3
283070	LOC283070	Replaced	57118	CAMK1D
171489	SPANXE	Replaced	64648	SPANXD
284702	NCRNA00201	Replaced	3192	HNRNPU
120329	CASP12	Replaced	100506742	CASP12
100124542	SNORA11E	Discontinued	NA
100170939	LOC100170939	Replaced	11039	SMA4
645090	CXorf30	Replaced	286464	CFAP47
100036519	FOXD4L2	Replaced	349334	FOXD4L4
374467	C12orf63	Replaced	144535	CFAP54
100128842	LOC100128842	Discontinued	NA
645851	?	Replaced	124923	SGK494
85411	C6orf114	Replaced	54438	GFOD1
641522	ARL17B	Replaced	100506084	ARL17B
144438	LOC144438	Replaced	904	CCNT1
244	ANXA8L2	Replaced	728113	ANXA8L1
100129637	LOC100129637	Replaced	54758	KLHDC4
26636	OR7E37P	Replaced	26637	OR7E36P
90110	LOC90110	Replaced	84961	FBXL20
201175	SH3D20	Replaced	201176	ARHGAP27
342615	SLFN12L	Replaced	100506736	SLFN12L
317712	?	Discontinued	NA
653129	PTPN20A	Replaced	26095	PTPN20
100240726	LOC100240726	Replaced	7686	MKRN7P
80867	HCG2P7	Discontinued	NA
751867	SNHG3-RCC1	Replaced	1104	RCC1
100133893	LOC100133893	Replaced	100287284	MANSC4
389517	SPDYE8P	Replaced	728524	SPDYE8P
100270710	LOC100270710	Discontinued	NA
652919	?	Discontinued	NA
57714	?	Replaced	57674	RNF213
654341	TBC1D3G	Replaced	101060321	TBC1D3G
286367	LOC286367	Replaced	55335	NIPSNAP3B
84849	MGC16142	Replaced	84060	RBM48
55747	FAM21B	Replaced	387680	FAM21A
100130426	?	Replaced	100286938	VPS13A-AS1
728603	?	Replaced	728798	FRMPD2B
768329	KIR3DP1	Replaced	548594	KIR3DP1
94023	DKFZp566F0947	Discontinued	NA
8385	OR1D4	Replaced	653166	OR1D4
100271831	LOC100271831	Discontinued	NA
5505	PPP1R2P1	Discontinued	NA
55410	NCRNA00185	Replaced	83869	TTTY14
100272216	LOC100272216	Discontinued	NA
151162	LOC151162	Replaced	4249	MGAT5
389523	GATSL1	Replaced	729438	GATSL2
100133171	SPANXB2	Replaced	728695	SPANXB1
339047	LOC339047	Replaced	339044	PKD1P1
136542	?	Replaced	100289017	MOXD2P
401940	PRAMEF3	Discontinued	NA
402377	LOC402377	Replaced	100288842	LOC100288842
400223	C14orf181	Discontinued	NA
729884	?	Replaced	28983	TMPRSS11E
64173	SPATA1	Replaced	100505741	SPATA1
643832	GAGE10	Discontinued	NA
170063	CXorf22	Replaced	286464	CFAP47
285733	LOC285733	Replaced	100507203	SMLR1
90834	LOC90834	Discontinued	NA
114130	MGC16384	Discontinued	NA
387097	C6orf147	Replaced	80759	KHDC1
100133469	LOC100133469	Replaced	338005	LINC00221
100286793	LOC100286793	Replaced	388685	LINC01138
440362	HERC2P4	Replaced	100289574	HERC2P4
145200	C14orf72	No Change	NA	LINC00239
100036563	HBII-52-24	No Change	NA	SNORD115-24
51260	CXorf26	No Change	NA	PBDC1
128872	HMGB3L1	No Change	NA	HMGB3P1
286094	LOC286094	No Change	NA	LINC01591
286097	EFHA2	No Change	NA	MICU3
57291	KIAA0114	No Change	NA	DANCR
55831	TMEM111	No Change	NA	EMC3
387328	ZNF322B	No Change	NA	ZNF322P1
389203	C4orf52	No Change	NA	SMIM20
196074	METT5D1	No Change	NA	METTL15
221960	C7orf28B	No Change	NA	CCZ1B
55291	SAPS3	No Change	NA	PPP6R3
378805	FLJ43663	No Change	NA	LINC-PINT
441362	?	No Change	NA	REXO1L6P
255101	CCDC108	No Change	NA	CFAP65
22870	SAPS1	No Change	NA	PPP6R1
152217	LOC152217	No Change	NA	NCBP2-AS2
387856	C12orf68	No Change	NA	CCDC184
22878	KIAA1012	No Change	NA	TRAPPC8
254559	LOC254559	No Change	NA	MIR9-3HG
2681	GGTA1	No Change	NA	GGTA1P
157381	LOC157381	No Change	NA	LINC00964
285154	C2orf58	No Change	NA	CYP1B1-AS1
280655	C14orf19	No Change	NA	IGBP1P1
129450	C2orf60	No Change	NA	TYW5
339674	LOC339674	No Change	NA	LINC00634
23506	KIAA0240	No Change	NA	GLTSCR1L
29923	C7orf68	No Change	NA	HILPDA
29105	C16orf80	No Change	NA	CFAP20
91689	C22orf32	No Change	NA	SMDT1
283651	C15orf21	No Change	NA	HMGN2P46
80723	TMEM22	No Change	NA	SLC35G2
89853	FAM125B	No Change	NA	MVB12B
150383	C22orf40	No Change	NA	CDPF1
150381	LOC150381	No Change	NA	PRR34-AS1
150384	CN5H6.4	No Change	NA	GTSE1-AS1
55330	CNO	No Change	NA	BLOC1S4
84902	CCDC123	No Change	NA	CEP89
221154	EFHA1	No Change	NA	MICU2
65260	C1orf163	No Change	NA	COA7
100132707	LOC100132707	No Change	NA	PAXIP1-AS2
201134	CCDC46	No Change	NA	CEP112
389690	FLJ43860	No Change	NA	MROH5
572558	LOC572558	No Change	NA	PGM5-AS1
57662	KIAA1543	No Change	NA	CAMSAP3
93655	ST7OT3	No Change	NA	ST7-OT3
51101	FAM164A	No Change	NA	ZC2HC1A
121952	LOC121952	No Change	NA	METTL21EP
790952	HESRG	No Change	NA	ESRG
619562	SNORA3	No Change	NA	SNORA3A
54581	SCAND2	No Change	NA	SCAND2P
172	AFG3L1	No Change	NA	AFG3L1P
205251	NCRNA00116	No Change	NA	LINC00116
550112	LOC550112	No Change	NA	UBA6-AS1
400668	PRSSL1	No Change	NA	PRSS57
286234	C9orf79	No Change	NA	SPATA31E1
9757	MLL4	No Change	NA	KMT2B
24141	C20orf103	No Change	NA	LAMP5
80817	KIAA1712	No Change	NA	CEP44
338821	LST-3TM12	No Change	NA	SLCO1B7
146861	AMAC1	No Change	NA	SLC35G3
100130274	LOC100130274	No Change	NA	CCDC166
149465	WDR65	No Change	NA	CFAP57
553137	?	No Change	NA	LOC553137
125893	ZNF816A	No Change	NA	ZNF816
136853	SRCRB4D	No Change	NA	SSC4D
93594	WDR67	No Change	NA	TBC1D31
100287227	LOC100287227	No Change	NA	TIPARP-AS1
690	BTF3L1	No Change	NA	BTF3P11
283460	C12orf27	No Change	NA	HNF1A-AS1
79701	C17orf101	No Change	NA	OGFOD3
51112	TTC15	No Change	NA	TRAPPC12
221424	C6orf154	No Change	NA	LRRC73
283796	GOLGA9P	No Change	NA	GOLGA8IP
23266	LPHN2	No Change	NA	ADGRL2
128859	BPIL3	No Change	NA	BPIFB6
128854	TSPYL3	No Change	NA	TSPY26P
92747	C20orf114	No Change	NA	BPIFB1
92749	C2orf39	No Change	NA	DRC1
55245	UQCC	No Change	NA	UQCC1
201895	C4orf34	No Change	NA	SMIM14
90799	CCDC45	No Change	NA	CEP95
158696	LOC158696	No Change	NA	LINC00889
159371	TMEM20	No Change	NA	SLC35G1
84221	C21orf56	No Change	NA	SPATC1L
140856	C20orf79	No Change	NA	SCP2D1
150622	LOC150622	No Change	NA	LINC01105
84229	CCDC135	No Change	NA	DRC7
90488	C12orf23	No Change	NA	TMEM263
26046	RNF160	No Change	NA	LTN1
388007	SERPINA13	No Change	NA	SERPINA13P
54996	MOSC2	No Change	NA	MARC2
400506	C16orf88	No Change	NA	KNOP1
83450	LRRC48	No Change	NA	DRC3
203238	C9orf93	No Change	NA	CCDC171
347736	TXNDC6	No Change	NA	NME9
390243	FOLR4	No Change	NA	IZUMO1R
390245	KDM4DL	No Change	NA	KDM4E
728410	LOC728410	No Change	NA	DUX4L2
23078	KIAA0564	No Change	NA	VWA8
23070	FTSJD2	No Change	NA	CMTR1
729020	LOC729020	No Change	NA	RPEL1
161635	CSNK1A1P	No Change	NA	CSNK1A1P1
729082	LOC729082	No Change	NA	OIP5-AS1
25895	FAM119B	No Change	NA	METTL21B
10383	TUBB2C	No Change	NA	TUBB4B
92249	LOC92249	No Change	NA	LINC01278
127281	C1orf93	No Change	NA	FAM213B
374946	C1orf187	No Change	NA	DRAXIN
65062	ALS2CR4	No Change	NA	TMEM237
100128788	LOC100128788	No Change	NA	SRRM2-AS1
100128782	C9orf130	No Change	NA	LINC00476
4297	MLL	No Change	NA	KMT2A
23383	KIAA0892	No Change	NA	MAU2
23384	CYTSA	No Change	NA	SPECC1L
3512	IGJ	No Change	NA	JCHAIN
151507	MSL3L2	No Change	NA	MSL3P1
641298	LOC641298	No Change	NA	SMG1P1
94158	CDRT15P	No Change	NA	CDRT15P1
7994	MYST3	No Change	NA	KAT6A
201158	FAM18B2	No Change	NA	TVP23C
55317	C20orf29	No Change	NA	AP5S1
220042	C11orf82	No Change	NA	DDIAS
55319	C4orf43	No Change	NA	TMA16
90871	C9orf123	No Change	NA	TMEM261
27231	ITGB1BP3	No Change	NA	NMRK2
253582	C6orf191	No Change	NA	TMEM244
100132354	LOC100132354	No Change	NA	LINC01512
80167	C4orf29	No Change	NA	ABHD18
80169	C17orf68	No Change	NA	CTC1
139212	CXorf41	No Change	NA	PIH1D3
645323	LOC645323	No Change	NA	LINC00461
221883	HOXA11AS	No Change	NA	HOXA11-AS
55857	PLK1S1	No Change	NA	KIZ
9776	KIAA0652	No Change	NA	ATG13
9772	KIAA0195	No Change	NA	TMEM94
146845	WDR16	No Change	NA	CFAP52
9295	SFRS11	No Change	NA	SRSF11
728039	C21orf122	No Change	NA	SSR4P1
100113386	UCKL1AS	No Change	NA	UCKL1-AS1
79729	C1orf113	No Change	NA	SH3D21
284361	C19orf63	No Change	NA	EMC10
283404	LOC283404	No Change	NA	LINC00592
284369	C19orf75	No Change	NA	SIGLECL1
100302640	LOC100302640	No Change	NA	LINC00882
375484	C5orf25	No Change	NA	SIMC1
648691	LOC648691	No Change	NA	LL22NC03-63E9.3
644186	C22orf41	No Change	NA	SYCE3
151194	FAM119A	No Change	NA	METTL21A
283025	C10orf40	No Change	NA	LINC01553
6433	SFRS8	No Change	NA	SFSWAP
6432	SFRS7	No Change	NA	SRSF7
6431	SFRS6	No Change	NA	SRSF6
401207	FLJ44606	No Change	NA	C5orf63
55780	C6orf70	No Change	NA	ERMARD
55783	FTSJD1	No Change	NA	CMTR2
51802	ACCN5	No Change	NA	ASIC5
140875	NCRNA00028	No Change	NA	LINC00028
283987	C17orf28	No Change	NA	HID1
283981	NCRNA00107	No Change	NA	LINC00685
283982	C17orf54	No Change	NA	LINC00469
440465	FLJ90757	No Change	NA	BAIAP2-AS1
2532	DARC	No Change	NA	ACKR1
200030	LOC200030	No Change	NA	NBPF11
22832	KIAA1009	No Change	NA	CEP162
644538	LOC644538	No Change	NA	SMIM10
130733	TMEM178	No Change	NA	TMEM178A
5380	PMS2L2	No Change	NA	PMS2P2
5382	PMS2L4	No Change	NA	PMS2P4
5383	PMS2L5	No Change	NA	PMS2P5
5387	PMS2L3	No Change	NA	PMS2P3
84435	GPR123	No Change	NA	ADGRA1
283902	HTA	No Change	NA	HCCAT5
7746	ZNF193	No Change	NA	ZSCAN9
79970	ZNF767	No Change	NA	ZNF767P
100169890	PEG3AS	No Change	NA	PEG3-AS1
133308	NHEDC2	No Change	NA	SLC9B2
152641	C4orf38	No Change	NA	WWC2-AS2
340508	LOC340508	No Change	NA	GAS2L1P2
157695	C8orf42	No Change	NA	TDRP
390226	GUCY2E	No Change	NA	GUCY2EP
202299	C5orf27	No Change	NA	LINC01554
23053	KIAA0913	No Change	NA	ZSWIM8
150197	LOC150197	No Change	NA	LINC00896
147525	C18orf18	No Change	NA	LINC00526
374969	CCDC23	No Change	NA	SVBP
154822	LOC154822	No Change	NA	LINC00689
26523	EIF2C1	No Change	NA	AGO1
26525	IL1F5	No Change	NA	IL36RN
653483	C6orf124	No Change	NA	MLLT4-AS1
285830	LOC285830	No Change	NA	HLA-F-AS1
728758	LOC728758	No Change	NA	PIN4P1
645676	LOC645676	No Change	NA	ASH1L-AS1
282566	C21orf71	No Change	NA	LINC00515
51314	TXNDC3	No Change	NA	NME8
348021	LOC348021	No Change	NA	LINC00442
55668	C14orf118	No Change	NA	GPATCH2L
64793	CCDC21	No Change	NA	CEP85
79992	C6orf59	No Change	NA	AGPAT4-IT1
64798	DEPDC6	No Change	NA	DEPTOR
440957	LOC440957	No Change	NA	SMIM4
641455	P704P	No Change	NA	POTEM
79713	TMEM149	No Change	NA	IGFLR1
348254	CCDC144C	No Change	NA	CCDC144CP
154313	C6orf165	No Change	NA	CFAP206
81501	TM7SF4	No Change	NA	DCSTAMP
283970	PDXDC2	No Change	NA	PDXDC2P
10357	?	No Change	NA	HMGB1P1
10536	LEPREL2	No Change	NA	P3H3
90141	C14orf143	No Change	NA	EFCAB11
113278	C20orf54	No Change	NA	SLC52A3
9711	KIAA0226	No Change	NA	RUBCN
283303	C11orf36	No Change	NA	MRGPRG-AS1
80853	JHDM1D	No Change	NA	KDM7A
403315	FAM92A3	No Change	NA	FAM92A1P2
79741	C10orf68	No Change	NA	CCDC7
79747	C6orf103	No Change	NA	ADGB
283422	C12orf36	No Change	NA	LINC01559
388152	LOC388152	No Change	NA	GOLGA2P7
677815	SNORA34	No Change	NA	SNORA2C
143384	C10orf46	No Change	NA	CACUL1
339483	MTMR9L	No Change	NA	MTMR9LP
375607	C7orf52	No Change	NA	NAT16
23731	C9orf5	No Change	NA	TMEM245
23732	C9orf4	No Change	NA	FRRS1L
130916	MTERFD2	No Change	NA	MTERF4
727830	FAM75A3	No Change	NA	SPATA31A3
285359	LOC285359	No Change	NA	PDCL3P4
7771	ZFP112	No Change	NA	ZNF112
653545	LOC653545	No Change	NA	DUX4L5
653544	LOC653544	No Change	NA	DUX4L6
84904	C9orf100	No Change	NA	ARHGEF39
126868	C1orf161	No Change	NA	MAB21L3
147172	LRRC37B2	No Change	NA	LRRC37BP1
646625	PRHOXNB	No Change	NA	URAD
100272146	LOC100272146	No Change	NA	NFE2L3P2
100272147	MTCP1NB	No Change	NA	CMC4
7696	ZNF137	No Change	NA	ZNF137P
128989	C22orf25	No Change	NA	TANGO2
100128977	LOC100128977	No Change	NA	MAPT-AS1
124512	C17orf95	No Change	NA	METTL23
440072	NCRNA00167	No Change	NA	LINC00167
390756	OR3A4	No Change	NA	OR3A4P
100134259	LOC100134259	No Change	NA	LINC01119
196740	C10orf72	No Change	NA	VSTM4
285753	C6orf182	No Change	NA	CEP57L1
284085	FLJ40504	No Change	NA	KRT18P55
79081	C11orf48	No Change	NA	LBHD1
79086	C19orf42	No Change	NA	SMIM7
129293	C2orf89	No Change	NA	TRABD2A
388387	LOC388387	No Change	NA	LINC00671
29102	RNASEN	No Change	NA	DROSHA
115557	GEFT	No Change	NA	ARHGEF25
727905	FAM75A5	No Change	NA	SPATA31A5
100130557	LOC100130557	No Change	NA	NFYC-AS1
220002	CYBASC3	No Change	NA	CYB561A3
165679	C3orf57	No Change	NA	SPTSSB
51300	C3orf1	No Change	NA	TIMMDC1
11261	CHP	No Change	NA	CHP1
729799	LOC729799	No Change	NA	SEC14L1P1
116828	CG030	No Change	NA	N4BP2L2-IT2
10472	ZNF238	No Change	NA	ZBTB18
494514	C18orf56	No Change	NA	TYMSOS
401431	LOC401431	No Change	NA	ATP6V0E2-AS1
144776	LOC144776	No Change	NA	LINC00410
441208	LOC441208	No Change	NA	ZNRF2P1
9731	KIAA0562	No Change	NA	CEP104
9738	CP110	No Change	NA	CCP110
286207	C9orf117	No Change	NA	CFAP157
121793	C13orf16	No Change	NA	TEX29
22973	LAMB2L	No Change	NA	LAMB2P1
349633	C11orf34	No Change	NA	PLET1
134466	LOC134466	No Change	NA	ZNF300P1
286101	ZNF252	No Change	NA	ZNF252P
54914	KIAA1797	No Change	NA	FOCAD
400931	LOC400931	No Change	NA	MIRLET7BHG
391343	?	No Change	NA	LOC391343
157777	C8orf45	No Change	NA	MCMDC2
54075	NCRNA00157	No Change	NA	CHODL-AS1
79768	C15orf29	No Change	NA	KATNBL1
91149	LOC91149	No Change	NA	RAPGEF4-AS1
51104	FAM108B1	No Change	NA	ABHD17B
9818	NUPL1	No Change	NA	NUP58
594840	ZFATAS	No Change	NA	ZFAT-AS1
594842	HAS2AS	No Change	NA	HAS2-AS1
29065	ASAP1IT1	No Change	NA	ASAP1-IT1
9811	KIAA0427	No Change	NA	CTIF
27042	C1orf107	No Change	NA	DIEXF
51495	PTPLAD1	No Change	NA	HACD3
9907	KIAA0415	No Change	NA	AP5Z1
653567	FAM23A	No Change	NA	TMEM236
653566	LOC653566	No Change	NA	SPCS2P4
149134	LOC149134	No Change	NA	LINC01341
131377	KBTBD5	No Change	NA	KLHL40
389289	C5orf39	No Change	NA	ANXA2R
25758	C11orf41	No Change	NA	KIAA1549L
253868	C20orf200	No Change	NA	C20orf166-AS1
79817	MOBKL2B	No Change	NA	MOB3B
646658	TMEM90A	No Change	NA	SYNDIG1L
57211	GPR126	No Change	NA	ADGRG6
57212	KIAA0495	No Change	NA	TP73-AS1
57213	C13orf1	No Change	NA	SPRYD7
57214	KIAA1199	No Change	NA	CEMIP
340811	AKR1CL1	No Change	NA	AKR1C8P
976	CD97	No Change	NA	ADGRE5
51639	SF3B14	No Change	NA	SF3B6
390595	LOC390595	No Change	NA	UBAP1L
390598	LBXCOR1	No Change	NA	SKOR1
51497	TH1L	No Change	NA	NELFCD
203522	DDX26B	No Change	NA	INTS6L
203259	C9orf25	No Change	NA	FAM219A
83695	C12orf32	No Change	NA	RHNO1
202781	LOC202781	No Change	NA	PAXIP1-AS1
387763	AG2	No Change	NA	C11orf96
285735	LOC285735	No Change	NA	LINC00326
57452	GALNTL1	No Change	NA	GALNT16
285954	LOC285954	No Change	NA	INHBA-AS1
151658	LOC151658	No Change	NA	LINC00635
151300	LOC151300	No Change	NA	LINC00608
57451	ODZ2	No Change	NA	TENM2
84989	LOC84989	No Change	NA	JMJD1C-AS1
90025	UBE2CBP	No Change	NA	UBE3D
84981	C17orf91	No Change	NA	MIR22HG
84983	MGC14436	No Change	NA	FAM222A-AS1
84984	C3orf34	No Change	NA	CEP19
84987	C12orf62	No Change	NA	COX14
728798	FRMPD2L1	No Change	NA	FRMPD2B
442308	LOC442308	No Change	NA	TUBBP6
91353	IGLL3	No Change	NA	IGLL3P
392636	TMEM195	No Change	NA	AGMO
221481	C6orf81	No Change	NA	ARMC12
93432	LOC93432	No Change	NA	MGAM2
79664	NARG2	No Change	NA	ICE2
284233	LOC284233	No Change	NA	CYP4F35P
64757	MOSC1	No Change	NA	MARC1
100134869	?	No Change	NA	UBE2Q2P2
285780	LOC285780	No Change	NA	LY86-AS1
284232	LOC284232	No Change	NA	ANKRD20A9P
7920	BAT5	No Change	NA	ABHD16A
57001	ACN9	No Change	NA	SDHAF3
441263	PMS2L11	No Change	NA	DTX2P1-UPK3BP1-PMS2P11
441951	C20orf199	No Change	NA	ZFAS1
22828	RBM16	No Change	NA	SCAF8
81854	MGC3771	No Change	NA	ZNF205-AS1
26128	KIAA1279	No Change	NA	KIF1BP
80097	FAM128B	No Change	NA	MZT2B
80094	FLJ14107	No Change	NA	BIN3-IT1
100130015	LOC100130015	No Change	NA	URAHP
399669	ZNF321	No Change	NA	ZNF321P
387978	C14orf23	No Change	NA	LINC01551
79847	TMEM180	No Change	NA	MFSD13A
79846	C7orf63	No Change	NA	CFAP69
2039	EPB49	No Change	NA	DMTN
55706	TMEM48	No Change	NA	NDC1
54586	C9orf11	No Change	NA	EQTN
55719	FAM178A	No Change	NA	SLF2
54059	C21orf57	No Change	NA	YBEY
27177	IL1F8	No Change	NA	IL36B
148932	MOBKL2C	No Change	NA	MOB3C
8843	GPR109B	No Change	NA	HCAR3
643719	LOC643719	No Change	NA	SCGB1B2P
27065	D4S234E	No Change	NA	NSG1
100128822	LOC100128822	No Change	NA	LINC01003
399744	LOC399744	No Change	NA	LINC00999
55726	C12orf11	No Change	NA	ASUN
55096	FLJ10213	No Change	NA	EBLN2
389119	C3orf54	No Change	NA	FAM212A
653505	PPIAL4B	No Change	NA	PPIAL4A
126321	C19orf28	No Change	NA	MFSD12
130951	C2orf65	No Change	NA	M1AP
728276	LOC728276	No Change	NA	CLEC19A
165082	GPR113	No Change	NA	ADGRF3
57577	KIAA1407	No Change	NA	CCDC191
414325	DEFB103B	No Change	NA	DEFB103A
414328	C9orf103	No Change	NA	IDNK
439934	C4orf11	No Change	NA	LINC00575
57495	KIAA1239	No Change	NA	NWD2
85369	FAM40A	No Change	NA	STRIP1
161502	C15orf26	No Change	NA	CFAP161
9675	KIAA0406	No Change	NA	TTI1
10455	PECI	No Change	NA	ECI2
79969	C6orf134	No Change	NA	ATAT1
340286	FAM183B	No Change	NA	FAM183BP
54919	HEATR2	No Change	NA	DNAAF5
54916	C14orf101	No Change	NA	TMEM260
152002	C3orf21	No Change	NA	XXYLT1
57578	KIAA1409	No Change	NA	UNC79
728409	C21orf54	No Change	NA	LINC01548
650623	LOC650623	No Change	NA	BEND3P3
11223	MST1P9	No Change	NA	MST1L
51430	C1orf9	No Change	NA	SUCO
25906	C11orf51	No Change	NA	ANAPC15
729467	LOC729467	No Change	NA	HSD52
23434	C3orf27	No Change	NA	LINC01565
150185	LOC150185	No Change	NA	LINC00895
93081	C13orf27	No Change	NA	TEX30
55974	RAG1AP1	No Change	NA	SLC50A1
340206	TREML3	No Change	NA	TREML3P
389634	LOC389634	No Change	NA	LINC00937
100286844	LOC100286844	No Change	NA	BCDIN3D-AS1
389320	C5orf48	No Change	NA	TEX43
26102	LOC26102	No Change	NA	DKFZP434A062
124783	C17orf46	No Change	NA	SPATA32
360132	FKBP9L	No Change	NA	FKBP9P1
149775	GNASAS	No Change	NA	GNAS-AS1
200420	ALMS1P	No Change	NA	ALMS1P1
79863	C18orf22	No Change	NA	RBFA
79866	C13orf34	No Change	NA	BORA
2015	EMR1	No Change	NA	ADGRE1
10591	C6orf108	No Change	NA	DNPH1
10597	TRAPPC2P1	No Change	NA	TRAPPC2B
285501	LOC285501	No Change	NA	LINC01098
27437	HSFYL1	No Change	NA	HSFY1P1
146227	BEAN	No Change	NA	BEAN1
29090	C18orf55	No Change	NA	TIMM21
729121	LOC729121	No Change	NA	RGPD4-AS1
100129396	FAM106C	No Change	NA	FAM106CP
283229	EFCAB4A	No Change	NA	CRACR2B
283592	C14orf86	No Change	NA	FAM181A-AS1
55845	C3orf10	No Change	NA	BRK1
541468	C1orf190	No Change	NA	LURAP1
126520	PLK5P	No Change	NA	PLK5
401288	C6orf122	No Change	NA	LINC00242
80256	KIAA1539	No Change	NA	FAM214B
259282	BOD1L	No Change	NA	BOD1L1
338442	GPR109A	No Change	NA	HCAR2
28956	ROBLD3	No Change	NA	LAMTOR2
28958	CCDC56	No Change	NA	COA3
150538	FLJ32063	No Change	NA	SATB2-AS1
414241	FAM35B	No Change	NA	FAM35BP
55701	FLJ10357	No Change	NA	ARHGEF40
389799	C9orf171	No Change	NA	CFAP77
348013	FAM70B	No Change	NA	TMEM255B
442454	LOC442454	No Change	NA	UQCRBP1
442459	LOC442459	No Change	NA	XRCC6P5
57707	KIAA1609	No Change	NA	TLDC1
51660	BRP44L	No Change	NA	MPC1
148362	C1orf58	No Change	NA	BROX
100133957	LOC100133957	No Change	NA	UXT-AS1
286411	RP1-177G6.2	No Change	NA	LINC00632
196872	MGC23270	No Change	NA	LINC00638
54934	C12orf41	No Change	NA	KANSL2
54931	RG9MTD1	No Change	NA	TRMT10C
619351	C8orf75	No Change	NA	LINC00589
255057	C19orf26	No Change	NA	CBARP
51493	C22orf28	No Change	NA	RTCB
152024	LOC152024	No Change	NA	LINC00691
125228	C18orf19	No Change	NA	FAM210A
285194	LOC285194	No Change	NA	TUSC7
577	BAI3	No Change	NA	ADGRB3
575	BAI1	No Change	NA	ADGRB1
606	BCL8	No Change	NA	NBEAP1
284021	C17orf60	No Change	NA	MILR1
284029	C17orf44	No Change	NA	LINC00324
388011	C14orf64	No Change	NA	LINC01550
171546	C14orf147	No Change	NA	SPTSSA
91316	LOC91316	No Change	NA	GUSBP11
23630	KCNE1L	No Change	NA	KCNE5
25920	COBRA1	No Change	NA	NELFB
113691	MGC16703	No Change	NA	TUBA3FP
27292	DIMT1L	No Change	NA	DIMT1
27291	C10orf28	No Change	NA	R3HCC1L
92667	C20orf72	No Change	NA	MGME1
731779	LOC731779	No Change	NA	LINC01300
55911	APOB48R	No Change	NA	APOBR
401494	PTPLAD2	No Change	NA	HACD4
401491	FLJ35024	No Change	NA	VLDLR-AS1
84856	LOC84856	No Change	NA	LINC00839
84852	C1orf203	No Change	NA	ATP1A1-AS1
84850	C9orf70	No Change	NA	GLIS3-AS1
142827	C10orf129	No Change	NA	ACSM6
126308	MOBKL2A	No Change	NA	MOB3A
390858	LOC390858	No Change	NA	OACYLP
283849	EXOC3L	No Change	NA	EXOC3L1
283848	CES8	No Change	NA	CES4A
440563	LOC440563	No Change	NA	HNRNPCL2
399668	NCRNA00086	No Change	NA	SMIM10L2A
154467	C6orf129	No Change	NA	CCDC167
56604	TUBB4Q	No Change	NA	TUBB7P
79800	ALS2CR8	No Change	NA	CARF
56936	C14orf162	No Change	NA	CCDC177
56935	C11orf75	No Change	NA	SMCO4
401145	FAM190A	No Change	NA	CCSER1
91978	C19orf20	No Change	NA	TPGS1
120939	C12orf59	No Change	NA	TMEM52B
9798	KIAA0174	No Change	NA	IST1
113763	C7orf29	No Change	NA	ZBED6CL
84664	CSPG4PY2	No Change	NA	CSPG4P2Y
100131726	LOC100131726	No Change	NA	FAM83A-AS1
118425	GDEP	No Change	NA	PCAT4
133558	HEATR7B2	No Change	NA	MROH2B
157869	C8orf84	No Change	NA	SBSPON
285205	LOC285205	No Change	NA	LINC00636
57007	CXCR7	No Change	NA	ACKR3
390053	OR52A4	No Change	NA	OR52A4P
79650	C16orf57	No Change	NA	USB1
152992	C4orf23	No Change	NA	TRMT44
100130417	FLJ39609	No Change	NA	LOC100130417
114819	CROCCL2	No Change	NA	CROCCP3
399706	NCRNA00200	No Change	NA	LINC00200
339512	C1orf110	No Change	NA	CCDC190
80154	LOC80154	No Change	NA	GOLGA2P10
100132341	KIAA0664P3	No Change	NA	CLUHP3
100132832	LOC100132832	No Change	NA	PMS2P9
51066	C3orf32	No Change	NA	SSUH2
400508	NCRNA00169	No Change	NA	CRYM-AS1
157627	LOC157627	No Change	NA	LINC00599
57724	KIAA1632	No Change	NA	EPG5
653113	LOC653113	No Change	NA	FAM86FP
254958	REXO1L1	No Change	NA	REXO1L1P
100132708	C2orf14	No Change	NA	CYP4F30P
140893	C20orf151	No Change	NA	RBBP8NL
140890	SFRS12	No Change	NA	SREK1
80209	C13orf23	No Change	NA	PROSER1
200232	C20orf106	No Change	NA	FAM209A
390535	GOLGA8E	No Change	NA	GOLGA8EP
651250	LOC651250	No Change	NA	LRRC37A16P
57184	C15orf17	No Change	NA	FAM219B
283383	GPR133	No Change	NA	ADGRD1
647946	LOC647946	No Change	NA	MIR924HG
100302692	NCRNA00182	No Change	NA	FTX
10141	C4orf6	No Change	NA	LINC01587
390284	?	No Change	NA	SRP14P1
121838	LOC121838	No Change	NA	LINC00284
100169752	LOC100169752	No Change	NA	TEX36-AS1
84059	GPR98	No Change	NA	ADGRV1
123811	C16orf63	No Change	NA	FOPNL
1620	DBC1	No Change	NA	BRINP1
84278	HIATL2	No Change	NA	MFSD14C
84279	C2orf7	No Change	NA	PRADC1
84273	C4orf14	No Change	NA	NOA1
84270	C9orf89	No Change	NA	CARD19
79000	C1orf135	No Change	NA	AUNIP
79008	GIYD2	No Change	NA	SLX1B
1197	CLK2P	No Change	NA	CLK2P1
284551	LOC284551	No Change	NA	LINC01226
148898	C1orf213	No Change	NA	ZNF436-AS1
222950	C7orf51	No Change	NA	NYAP1
643677	LOC643677	No Change	NA	CCDC168
727957	HEATR7A	No Change	NA	MROH1
23614	PPY2	No Change	NA	PPY2P
25941	C18orf10	No Change	NA	TPGS2
51297	PLUNC	No Change	NA	BPIFA1
286333	C9orf109	No Change	NA	FAM225A
54994	C20orf11	No Change	NA	GID8
285796	LOC285796	No Change	NA	PACRG-AS1
10974	C10orf116	No Change	NA	ADIRF
84873	GPR128	No Change	NA	ADGRG7
51765	MST4	No Change	NA	STK26
653677	SEC1	No Change	NA	SEC1P
158572	LOC158572	No Change	NA	USP27X-AS1
283860	C16orf81	No Change	NA	LINC00304
283867	LOC283867	No Change	NA	LINC00922
401629	NCRNA00230B	No Change	NA	FAM224B
100144604	LOC100144604	No Change	NA	LINC00930
79827	ASAM	No Change	NA	CLMP
56911	C21orf7	No Change	NA	MAP3K7CL
79825	CCDC48	No Change	NA	EFCC1
79823	C2orf34	No Change	NA	CAMKMT
400746	C1orf130	No Change	NA	NCMAP
92014	MCART1	No Change	NA	SLC25A51
339240	LOC339240	No Change	NA	KRT17P5
118924	C10orf4	No Change	NA	FRA10AC1
63877	C10orf84	No Change	NA	FAM204A
84641	HIATL1	No Change	NA	MFSD14B
5890	RAD51L1	No Change	NA	RAD51B
5892	RAD51L3	No Change	NA	RAD51D
283267	LOC283267	No Change	NA	LINC00294
79631	EFTUD1	No Change	NA	EFL1
399726	C10orf114	No Change	NA	CASC10
150786	LOC150786	No Change	NA	WTH3DI
375337	C3orf77	No Change	NA	TOPAZ1
126074	C19orf39	No Change	NA	SWSAP1
57223	SMEK2	No Change	NA	PPP4R3B
339535	LOC339535	No Change	NA	LINC01139
9987	HNRPDL	No Change	NA	HNRNPDL
64175	LEPRE1	No Change	NA	P3H1
503538	NCRNA00181	No Change	NA	A1BG-AS1
26829	RNU5E	No Change	NA	RNU5E-1
118490	ZMYND17	No Change	NA	MSS51
55744	C7orf44	No Change	NA	COA1
116437	LOC116437	No Change	NA	LINC01257
145173	B3GALTL	No Change	NA	B3GLCT
80183	C13orf18	No Change	NA	KIAA0226L
51622	C7orf28A	No Change	NA	CCZ1
729522	AACSL	No Change	NA	AACSP1
27156	RTDR1	No Change	NA	RSPH14
253714	C6orf167	No Change	NA	MMS22L
100132724	LOC100132724	No Change	NA	DCAF13P3
80772	GLTPD1	No Change	NA	CPTP
201965	RWDD4A	No Change	NA	RWDD4
440307	TTLL13	No Change	NA	TTLL13P
80054	LOC80054	No Change	NA	CEBPA-AS1
54978	C2orf18	No Change	NA	SLC35F6
338758	LOC338758	No Change	NA	LINC00936
84250	ANKRD32	No Change	NA	SLF1
388588	LOC388588	No Change	NA	SMIM1
728464	C6orf186	No Change	NA	METTL24
285958	C7orf40	No Change	NA	SNHG15
112849	C14orf149	No Change	NA	L3HYPDH
284573	C1orf157	No Change	NA	LINC00303
442388	?	No Change	NA	SDR16C6P
284688	LOC284688	No Change	NA	LINC01142
89837	FAM7A3	No Change	NA	ULK4P3
389791	LOC389791	No Change	NA	PTGES2-AS1
195827	C9orf21	No Change	NA	AAED1
25960	GPR124	No Change	NA	ADGRA2
497634	BEYLA	No Change	NA	LINC00293
115004	C6orf150	No Change	NA	MB21D1
7541	ZFP161	No Change	NA	ZBTB14
55267	C22orf26	No Change	NA	PRR34
100216001	LOC100216001	No Change	NA	LINC00704
150291	C22orf27	No Change	NA	MORC2-AS1
4999	ORC2L	No Change	NA	ORC2
348926	LOC348926	No Change	NA	FAM86EP
200373	PCDP1	No Change	NA	CFAP221
283638	KIAA0284	No Change	NA	CEP170B
196913	C14orf183	No Change	NA	LINC01599
387640	C10orf140	No Change	NA	SKIDA1
387644	NCRNA00202	No Change	NA	LINC00202-1
387647	LOC387647	No Change	NA	PTCHD3P1
90271	C10orf75	No Change	NA	OLMALINC
60673	C12orf44	No Change	NA	ATG101
100132911	DPH3B	No Change	NA	DPH3P1
63895	FAM38B	No Change	NA	PIEZO2
128710	C20orf94	No Change	NA	SLX4IP
83932	C1orf124	No Change	NA	SPRTN
9289	GPR56	No Change	NA	ADGRG1
9284	NPIP	No Change	NA	NPIPA1
728819	LOC728819	No Change	NA	C1GALT1C1L
54508	FLJ11235	No Change	NA	EPB41L4A-AS2
402483	FLJ45340	No Change	NA	LINC01000
644165	LOC644165	No Change	NA	BCRP3
388910	NCRNA00207	No Change	NA	LINC00207
149643	C1orf227	No Change	NA	SPATA45
10382	TUBB4	No Change	NA	TUBB4A
284749	LOC284749	No Change	NA	LINC00494
574029	DUSP5P	No Change	NA	DUSP5P1
147081	C17orf69	No Change	NA	CRHR1-IT1
339559	ZNF642	No Change	NA	ZFP69
144571	LOC144571	No Change	NA	A2M-AS1
199800	C19orf76	No Change	NA	ADM5
170067	FAM48B2	No Change	NA	SUPT20HL2
55010	C12orf48	No Change	NA	PARPBP
55018	C17orf73	No Change	NA	LINC00483
91523	FAM113B	No Change	NA	PCED1B
145624	PAR1	No Change	NA	PWAR1
253143	C22orf30	No Change	NA	PRR14L
56270	WDR45L	No Change	NA	WDR45B
389730	FAM75A6	No Change	NA	SPATA31A6
100272228	LOC100272228	No Change	NA	LINC00894
64123	ELTD1	No Change	NA	ADGRL4
100133161	LOC100133161	No Change	NA	LINC01001
134548	ANKRD43	No Change	NA	SOWAHA
192669	EIF2C3	No Change	NA	AGO3
202459	OSTCL	No Change	NA	OSTCP1
113444	C1orf212	No Change	NA	SMIM12
391267	C21orf81	No Change	NA	ANKRD20A11P
116254	C6orf72	No Change	NA	GINM1
112869	CCDC101	No Change	NA	SGF29
58493	C9orf80	No Change	NA	INIP
164781	WDR69	No Change	NA	DAW1
282969	C10orf125	No Change	NA	FUOM
285600	C5orf36	No Change	NA	KIAA0825
64859	OBFC2A	No Change	NA	NABP1
54103	PION	No Change	NA	GSAP
25980	C20orf4	No Change	NA	AAR2
283761	LOC283761	No Change	NA	LINC00928
642587	LOC642587	No Change	NA	MIR205HG
126731	C1orf96	No Change	NA	CCSAP
84830	C6orf105	No Change	NA	ADTRP
84837	C14orf128	No Change	NA	ARHGAP5-AS1
493753	C2orf64	No Change	NA	COA5
493754	LOC493754	No Change	NA	GS1-124K5.11
767846	C1orf152	No Change	NA	PFN1P2
92973	LOC92973	No Change	NA	LINC00950
93550	ANUBL1	No Change	NA	ZFAND4
93556	C3orf50	No Change	NA	EGFEM1P
254240	BPIL2	No Change	NA	BPIFC
81926	FAM108A1	No Change	NA	ABHD17A
80035	C15orf28	No Change	NA	ANP32A-IT1
85007	AGXT2L2	No Change	NA	PHYKPL
203111	C8orf47	No Change	NA	ERICH5
54838	C10orf26	No Change	NA	WBP1L
255193	C19orf34	No Change	NA	CSNK1G2-AS1
51652	VPS24	No Change	NA	CHMP3
285512	FAM13AOS	No Change	NA	FAM13A-AS1
342346	LOC342346	No Change	NA	C16orf96
10147	SFRS14	No Change	NA	SUGP2
390637	C15orf58	No Change	NA	GDPGP1
149620	LOC149620	No Change	NA	CHIAP2
54785	C17orf59	No Change	NA	BORCS6
100130302	FAM48B1	No Change	NA	SUPT20HL1
440087	C12orf69	No Change	NA	SMCO3
440081	DDX12	No Change	NA	DDX12P
642976	NCRNA00110	No Change	NA	GRIK1-AS1
11064	CEP110	No Change	NA	CNTRL
79363	C1orf89	No Change	NA	RSG1
126695	C1orf172	No Change	NA	KDF1
55073	LRRC37A4	No Change	NA	LRRC37A4P
51554	CCRL1	No Change	NA	ACKR4
51001	MTERFD1	No Change	NA	MTERF3
374355	C10orf96	No Change	NA	CCDC172
144809	C13orf30	No Change	NA	FAM216B
80161	NCRNA00105	No Change	NA	ASMTL-AS1
23350	SR140	No Change	NA	U2SURP
8085	MLL2	No Change	NA	KMT2D
23379	KIAA0947	No Change	NA	ICE1
260436	C4orf7	No Change	NA	FDCSP
54090	NCRNA00111	No Change	NA	LINC00111
80737	C6orf27	No Change	NA	VWA7
441046	LOC441046	No Change	NA	GUSBP5
389715	C9orf144	No Change	NA	FAM205BP
57698	KIAA1598	No Change	NA	SHTN1
645431	LOC645431	No Change	NA	FUT8-AS1
64145	ZFYVE20	No Change	NA	RBSN
128344	C1orf88	No Change	NA	PIFO
80195	C10orf57	No Change	NA	TMEM254
359822	NCRNA00099	No Change	NA	KCNIP4-IT1
79960	PHF17	No Change	NA	JADE1
404201	C4orf12	No Change	NA	WDFY3-AS2
84293	C10orf58	No Change	NA	FAM213A
1939	LGTN	No Change	NA	EIF2D
84299	C17orf37	No Change	NA	MIEN1
167359	MGC42105	No Change	NA	NIM1K
723972	LOC723972	No Change	NA	ANP32AP1
123872	LRRC50	No Change	NA	DNAAF1
375748	C9orf102	No Change	NA	ERCC6L2
401331	RASA4P	No Change	NA	RASA4CP
79066	METT10D	No Change	NA	METTL16
25845	LOC25845	No Change	NA	PP7080
30817	EMR2	No Change	NA	ADGRE2
399844	FLJ45445	No Change	NA	LINC01002
55199	FAM86C	No Change	NA	FAM86C1
55449	C14orf167	No Change	NA	DHRS4-AS1
55194	FAM176B	No Change	NA	EVA1B
55196	C12orf35	No Change	NA	KIAA1551
8418	CMAH	No Change	NA	CMAHP
145837	LOC145837	No Change	NA	DRAIC
221443	C6orf130	No Change	NA	OARD1
221442	LOC221442	No Change	NA	ADCY10P1
92370	ACPL2	No Change	NA	PXYLP1
89876	C3orf15	No Change	NA	MAATS1
642569	TRIM53	No Change	NA	TRIM53AP
149837	LOC149837	No Change	NA	LINC00654
374650	GOLGA6L5	No Change	NA	GOLGA6L5P
51025	TIMM16	No Change	NA	PAM16
389383	C6orf126	No Change	NA	CLPSL2
124989	C17orf57	No Change	NA	EFCAB13
286828	CSN1S2A	No Change	NA	CSN1S2AP
79886	C9orf82	No Change	NA	CAAP1
130162	C2orf63	No Change	NA	CLHC1
140711	C20orf118	No Change	NA	TLDC2
140710	C20orf117	No Change	NA	SOGA1
146713	HRNBP3	No Change	NA	RBFOX3
85026	C9orf37	No Change	NA	ARRDC1-AS1
85027	C5orf62	No Change	NA	SMIM3
196951	C15orf33	No Change	NA	FAM227B
84197	SGK196	No Change	NA	POMK
84190	C12orf26	No Change	NA	METTL25
360205	C17orf93	No Change	NA	PRAC2
100131814	C6orf217	No Change	NA	LINC00271
745	C11orf9	No Change	NA	MYRF
746	C11orf10	No Change	NA	TMEM258
347689	SOX2OT	No Change	NA	SOX2-OT
79161	C7orf23	No Change	NA	TMEM243
388372	CCL4L2	No Change	NA	CCL4L1
11041	B3GNT1	No Change	NA	B4GAT1
115416	C7orf30	No Change	NA	MALSU1
284254	C18orf26	No Change	NA	DYNAP
8649	MAPKSP1	No Change	NA	LAMTOR3
319085	NCRNA00203	No Change	NA	ITPK1-AS1
23591	C17orf88	No Change	NA	FAM215A
23594	ORC6L	No Change	NA	ORC6
23595	ORC3L	No Change	NA	ORC3
55051	C14orf102	No Change	NA	NRDE2
340204	C6orf127	No Change	NA	CLPSL1
729234	LOC729234	No Change	NA	FAHD2CP
23376	KIAA0776	No Change	NA	UFL1
401089	C3orf72	No Change	NA	FOXL2NB
51029	PPPDE1	No Change	NA	DESI2
283392	LOC283392	No Change	NA	TRHDE-AS1
401082	FLJ25363	No Change	NA	LINC01205
554202	LOC554202	No Change	NA	MIR31HG
100125556	LOC100125556	No Change	NA	FAM86JP
79948	LPPR3	No Change	NA	PLPPR3
79949	C10orf81	No Change	NA	PLEKHS1
554203	NCRNA00183	No Change	NA	JPX
79940	C6orf155	No Change	NA	LINC00472
404770	?	No Change	NA	SPATA31B1P
57103	C12orf5	No Change	NA	TIGAR
90550	CCDC109A	No Change	NA	MCU
54482	CCDC76	No Change	NA	TRMT13
731789	LOC731789	No Change	NA	LINC00202-2
440253	WHAMML2	No Change	NA	WHAMMP2
642658	SCXB	No Change	NA	SCX
54660	PCDHB18	No Change	NA	PCDHB18P
54661	PCDHB17	No Change	NA	PCDHB17P
256329	C11orf35	No Change	NA	LMNTD2
80298	MTERFD3	No Change	NA	MTERF2
112752	C14orf179	No Change	NA	IFT43
84418	C5orf32	No Change	NA	CYSTM1
339290	LOC339290	No Change	NA	LINC00667
440925	LOC440925	No Change	NA	LINC01124
164127	C1orf65	No Change	NA	CCDC185
408263	C5orf40	No Change	NA	FNDC9
100130776	LOC100130776	No Change	NA	AGAP2-AS1
283726	FAM154B	No Change	NA	SAXO2
79447	C16orf53	No Change	NA	PAGR1
285419	LOC285419	No Change	NA	LINC01091
257144	GCET2	No Change	NA	GCSAM
442421	LOC442421	No Change	NA	PTGER4P2-CDK2AP2P2
158067	C9orf98	No Change	NA	AK8
692200	SNORD85	No Change	NA	SNORD103C
257000	PLAC2	No Change	NA	TINCR
55421	C17orf85	No Change	NA	NCBP3
55425	KIAA1704	No Change	NA	GPALPP1
81698	C15orf5	No Change	NA	LINC00597
255167	LOC255167	No Change	NA	LINC01018
51214	IGF2AS	No Change	NA	IGF2-AS
27099	C7orf54	No Change	NA	SND1-IT1
60526	C2orf43	No Change	NA	LDAH
56997	CABC1	No Change	NA	ADCK3
150527	LOC150527	No Change	NA	TISP43
255783	PRR24	No Change	NA	INAFM1
100128675	LOC100128675	No Change	NA	HPN-AS1
118491	TTC18	No Change	NA	CFAP70
80072	C15orf34	No Change	NA	HEXA-AS1
9597	SMAD5OS	No Change	NA	SMAD5-AS1
441869	LOC441869	No Change	NA	ANKRD65
441317	FAM90A7	No Change	NA	FAM90A7P
220429	LOC220429	No Change	NA	CTAGE10P
23063	WAPAL	No Change	NA	WAPL
284185	C17orf55	No Change	NA	LINC00482
677830	SNORA50	No Change	NA	SNORA50A
157556	C8orf56	No Change	NA	BAALC-AS2
285093	C2orf85	No Change	NA	RTP5
84319	C3orf26	No Change	NA	CMSS1
84316	LSMD1	No Change	NA	NAA38
123688	AGPHD1	No Change	NA	HYKK
400866	NCRNA00114	No Change	NA	LINC00114
100009676	LOC100009676	No Change	NA	ZBTB11-AS1
84365	MKI67IP	No Change	NA	NIFK
374973	C1orf223	No Change	NA	TEX38
100131691	LOC100131691	No Change	NA	MZF1-AS1
283551	C14orf182	No Change	NA	LINC01588
284276	LOC284276	No Change	NA	LINC00908
284274	C18orf62	No Change	NA	SMIM21
100131434	LOC100131434	No Change	NA	LINC00893
93587	RG9MTD2	No Change	NA	TRMT10A
23313	C22orf9	No Change	NA	KIAA0930
6430	SFRS5	No Change	NA	SRSF5
26164	GTPBP5	No Change	NA	MTG2
441089	LOC441089	No Change	NA	CRSP8P
139420	SMEK3P	No Change	NA	PPP4R3CP
81488	GRINL1A	No Change	NA	POLR2M
140699	C20orf132	No Change	NA	MROH8
139285	FAM123B	No Change	NA	AMER1
554226	NCRNA00164	No Change	NA	ANKRD30BL
440359	CSDAP1	No Change	NA	YBX3P1
440356	LOC440356	No Change	NA	CDIPT-AS1
79927	GRRP1	No Change	NA	FAM110D
54462	FAM190B	No Change	NA	CCSER2
732275	LOC732275	No Change	NA	LINC00917
222611	GPR111	No Change	NA	ADGRF2
222487	GPR97	No Change	NA	ADGRG3
9694	TTC35	No Change	NA	EMC2
84787	SUV420H2	No Change	NA	KMT5C
256302	C17orf103	No Change	NA	NATD1
100129075	C14orf33	No Change	NA	KTN1-AS1
84437	KIAA1826	No Change	NA	MSANTD4
1797	DOM3Z	No Change	NA	DXO
93100	NAPRT1	No Change	NA	NAPRT
10609	SC65	No Change	NA	P3H4
285401	LOC285401	No Change	NA	LINC00698
440905	LOC440905	No Change	NA	FAR2P1
206338	AQPEP	No Change	NA	LVRN
283314	LOC283314	No Change	NA	C1RL-AS1
401303	ZNF815	No Change	NA	ZNF815P
114915	NCRNA00219	No Change	NA	EPB41L4A-AS1
112770	C1orf85	No Change	NA	GLMP
285668	FLJ37543	No Change	NA	C5orf64
284131	FLJ35220	No Change	NA	ENDOV
222826	C6orf146	No Change	NA	FAM217A
9840	KIAA0748	No Change	NA	TESPA1
9847	KIAA0528	No Change	NA	C2CD5
84892	C3orf39	No Change	NA	POMGNT2
131831	FAM194A	No Change	NA	ERICH6
692224	FBXO22OS	No Change	NA	FBXO22-AS1
53630	BCMO1	No Change	NA	BCO1
442213	C6orf138	No Change	NA	PTCHD4
51234	TMEM85	No Change	NA	EMC4
51236	C8orf30A	No Change	NA	HGH1
51237	MGC29506	No Change	NA	MZB1
51233	C22orf43	No Change	NA	DRICH1
729668	LOC729668	No Change	NA	GOLGA2P6
256957	C17orf66	No Change	NA	HEATR9
132001	C3orf31	No Change	NA	TAMM41
64645	HIAT1	No Change	NA	MFSD14A
4610	MYCL1	No Change	NA	MYCL
128826	C20orf166	No Change	NA	MIR1-1HG
161394	C14orf174	No Change	NA	SAMD15
340094	LOC340094	No Change	NA	LINC01020
644596	NCRNA00087	No Change	NA	SMIM10L2B
254042	MAP1D	No Change	NA	METAP1D
64396	GMCL1L	No Change	NA	GMCL1P1
344875	DVWA	No Change	NA	COL6A4P1
200197	C1orf126	No Change	NA	TMEM51-AS1
8882	ZNF259	No Change	NA	ZPR1
9200	PTPLA	No Change	NA	HACD1
54859	C3orf75	No Change	NA	ELP6
283914	LOC283914	No Change	NA	LINC01566
285033	LOC285033	No Change	NA	STARD7-AS1
619434	NCRNA00051	No Change	NA	LINC00051
147804	LOC147804	No Change	NA	TPM3P9
2909	GRLF1	No Change	NA	ARHGAP35
378825	NCRNA00162	No Change	NA	LINC00162
400804	LOC400804	No Change	NA	C1orf140
5315	PKM2	No Change	NA	PKM
7745	ZNF192	No Change	NA	ZKSCAN8
54925	ZNF434	No Change	NA	ZSCAN32
100302401	LOC100302401	No Change	NA	RASAL2-AS1
91748	C14orf43	No Change	NA	ELMSAN1
91749	KIAA1919	No Change	NA	MFSD4B
79692	ZNF322A	No Change	NA	ZNF322
79696	FAM164C	No Change	NA	ZC2HC1C
347745	PAR4	No Change	NA	PWAR4
347746	PAR-SN	No Change	NA	PWARSN
127428	C1orf83	No Change	NA	TCEANC2
677823	SNORA42	No Change	NA	SNORA80E
51537	MTP18	No Change	NA	MTFP1
51531	C9orf156	No Change	NA	TRMO
100128023	LOC100128023	No Change	NA	DPPA2P3
55634	ZNF673	No Change	NA	KRBOX4
23334	KIAA0467	No Change	NA	SZT2
116729	DYSFIP1	No Change	NA	PPP1R27
728855	LOC728855	No Change	NA	LINC00623
93653	ST7OT1	No Change	NA	ST7-AS1
64493	NCRNA00235	No Change	NA	LINC00235
284835	C21orf130	No Change	NA	LINC00323
284837	LOC284837	No Change	NA	AATBC
284836	C21orf125	No Change	NA	LINC00319
55367	LRDD	No Change	NA	PIDD1
51398	C19orf56	No Change	NA	WDR83OS
196051	PPAPDC1A	No Change	NA	PLPP4
149954	C20orf186	No Change	NA	BPIFB4
92070	C4orf42	No Change	NA	CTBP1-AS2
84931	LOC84931	No Change	NA	LINC01101
84935	C13orf33	No Change	NA	MEDAG
84934	C12orf52	No Change	NA	RITA1
23306	TMEM194A	No Change	NA	NEMP1
150159	NHEDC1	No Change	NA	SLC9B1
162540	IMP5	No Change	NA	SPPL2C
400027	LOC400027	No Change	NA	LINC00938
138716	C9orf23	No Change	NA	RPP25L
199675	C19orf59	No Change	NA	MCEMP1
128497	C20orf165	No Change	NA	SPATA25
113115	FAM54A	No Change	NA	MTFR2
53820	DSCR6	No Change	NA	RIPPLY3
7955	STL	No Change	NA	RNF217-AS1
140947	C5orf20	No Change	NA	DCANP1
80133	C1orf129	No Change	NA	MROH9
256369	C14orf48	No Change	NA	LINC00521
100190938	LOC100190938	No Change	NA	RAMP2-AS1
100190939	LOC100190939	No Change	NA	TPT1-AS1
441294	LOC441294	No Change	NA	CTAGE15
163702	IL28RA	No Change	NA	IFNLR1
84767	SPRYD5	No Change	NA	TRIM51
10542	HBXIP	No Change	NA	LAMTOR5
415056	LOC415056	No Change	NA	CNTFR-AS1
54627	KIAA1383	No Change	NA	MAP10
284485	C1orf230	No Change	NA	RIIAD1
283106	CSNK2A1P	No Change	NA	CSNK2A3
283450	C12orf51	No Change	NA	HECTD4
10404	PGCP	No Change	NA	CPQ
388789	LOC388789	No Change	NA	LINC00493
645687	C14orf34	No Change	NA	LINC00520
10748	KLRA1	No Change	NA	KLRAP1
389763	FLJ46321	No Change	NA	SPATA31D1
728045	?	No Change	NA	PPBPP1
219557	MGC26647	No Change	NA	C7orf62
11143	MYST2	No Change	NA	KAT7
151050	C2orf67	No Change	NA	KANSL1L
58508	MLL3	No Change	NA	KMT2C
1515	CTSL2	No Change	NA	CTSV
1514	CTSL1	No Change	NA	CTSL
55172	C14orf104	No Change	NA	DNAAF2
55177	FAM82A2	No Change	NA	RMDN3
114796	KIAA1908	No Change	NA	PSMG3-AS1
100192378	LOC100192378	No Change	NA	ZFHX4-AS1
100192379	LOC100192379	No Change	NA	PP12613
401251	C6orf26	No Change	NA	SAPCD1
401253	C6orf227	No Change	NA	LINC00336
78998	C8orf51	No Change	NA	RHPN1-AS1
389493	LOC389493	No Change	NA	NUPR2
100188953	NCRNA00092	No Change	NA	LINC00092
136541	TRYX3	No Change	NA	PRSS58
285370	LOC285370	No Change	NA	LINC00606
286554	BCORL2	No Change	NA	BCORP1
64745	METT11D1	No Change	NA	METTL17
55829	SELS	No Change	NA	VIMP
283687	C15orf37	No Change	NA	ST20-AS1
57464	FAM40B	No Change	NA	STRIP2
378832	NCRNA00175	No Change	NA	COL18A1-AS1
645332	LOC645332	No Change	NA	FAM86C2P
26012	NELF	No Change	NA	NSMF
26013	L3MBTL	No Change	NA	L3MBTL1
26011	ODZ4	No Change	NA	TENM4
22863	KIAA0831	No Change	NA	ATG14
79100	MGC4473	No Change	NA	LINC00626
91012	LASS5	No Change	NA	CERS5
205147	FAM123C	No Change	NA	AMER3
83661	MS4A8B	No Change	NA	MS4A8
375513	GUSBL2	No Change	NA	GUSBP4
9169	SFRS2IP	No Change	NA	SCAF11
25843	MOBKL3	No Change	NA	MOB4
27198	GPR81	No Change	NA	HCAR1
283663	LOC283663	No Change	NA	LINC00926
7469	WHSC2	No Change	NA	NELFA
28971	C11orf67	No Change	NA	AAMDC
401397	LOC401397	No Change	NA	LINC00998
55345	C4orf21	No Change	NA	ZGRF1
55610	CCDC132	No Change	NA	VPS50
84916	CIRH1A	No Change	NA	UTP4
84915	C12orf34	No Change	NA	FAM222A
149934	C20orf191	No Change	NA	NCOR1P1
221143	N6AMT2	No Change	NA	EEF1AKMT1
198437	C20orf201	No Change	NA	LKAAEAR1
10895	PPBPL2	No Change	NA	PPBPP2
348808	NCRNA00119	No Change	NA	NPHP3-AS1
348807	CCDC37	No Change	NA	CFAP100
391714	?	No Change	NA	TRIM75P
348110	C15orf38	No Change	NA	ARPIN
57613	KIAA1467	No Change	NA	FAM234B
90826	PRMT10	No Change	NA	PRMT9
63933	CCDC90A	No Change	NA	MCUR1
51111	SUV420H1	No Change	NA	KMT5B
63939	C20orf177	No Change	NA	FAM217B
113177	C19orf36	No Change	NA	IZUMO4
649330	LOC649330	No Change	NA	HNRNPCL3
85438	C4orf35	No Change	NA	CABS1
200523	C2orf51	No Change	NA	TEX37
138199	C9orf41	No Change	NA	CARNMT1
387104	C6orf174	No Change	NA	SOGA3
414926	C15orf50	No Change	NA	LINC00593
9747	FAM115A	No Change	NA	TCAF1
388815	C21orf34	No Change	NA	MIR99AHG
285335	SLC9A10	No Change	NA	SLC9C1
115024	NT5C3L	No Change	NA	NT5C3B
115795	C3orf24	No Change	NA	FANCD2OS
729991	LOC729991	No Change	NA	BORCS8
100130717	CECR4	No Change	NA	CECR5-AS1
100129239	CXorf51	No Change	NA	CXorf51A
338588	LOC338588	No Change	NA	LINC00705
58527	C6orf115	No Change	NA	ABRACL
284422	C19orf77	No Change	NA	SMIM24
440944	LOC440944	No Change	NA	THUMPD3-AS1
65996	MGC2752	No Change	NA	CENPBD1P1
100271722	LOC100271722	No Change	NA	LINC00899
399959	LOC399959	No Change	NA	MIR100HG
54471	SMCR7L	No Change	NA	MIEF1
339453	C1orf70	No Change	NA	TMEM240
114044	MCM3APAS	No Change	NA	MCM3AP-AS1
114041	C21orf88	No Change	NA	B3GALT5-AS1
114043	C21orf90	No Change	NA	TSPEAR-AS2
28984	C13orf15	No Change	NA	RGCC
23271	CAMSAP1L1	No Change	NA	CAMSAP2
23272	C3orf63	No Change	NA	FAM208A
28989	METTL11A	No Change	NA	NTMT1
283932	NCRNA00095	No Change	NA	FBXL19-AS1
51275	C12orf47	No Change	NA	MAPKAPK5-AS1
400224	UPF0639	No Change	NA	PLEKHD1
151963	C3orf59	No Change	NA	MB21D2
120425	AMICA1	No Change	NA	JAML
128861	C20orf71	No Change	NA	BPIFA3
84791	C1orf97	No Change	NA	LINC00467
392360	CTSL3	No Change	NA	CTSL3P
84793	MGC12982	No Change	NA	FOXD2-AS1
401232	DKFZP686I15217	No Change	NA	LINC01011
401237	FLJ22536	No Change	NA	CASC15
117248	GALNTL2	No Change	NA	GALNT15
158376	LOC158376	No Change	NA	LINC00961
678655	LOC678655	No Change	NA	CD27-AS1
27178	IL1F7	No Change	NA	IL37
27179	IL1F6	No Change	NA	IL36A
441376	C8orf85	No Change	NA	AARD
677842	SNORA76	No Change	NA	SNORA50C
154288	C6orf221	No Change	NA	KHDC3L
133686	C5orf33	No Change	NA	NADK2
10715	LASS1	No Change	NA	CERS1
54981	C9orf95	No Change	NA	NMRK1
112942	CCDC104	No Change	NA	CFAP36
387718	C10orf122	No Change	NA	TEX36
645784	FLJ40330	No Change	NA	ANKRD36BP2
387885	CCDC42B	No Change	NA	CFAP73
83460	TMEM93	No Change	NA	EMC6
89978	ATPBD4	No Change	NA	DPH6
280660	?	No Change	NA	SSX9
339669	C22orf33	No Change	NA	TEX33
140894	C20orf152	No Change	NA	CNBD2
83606	C22orf13	No Change	NA	GUCD1
100131454	ELP2P	No Change	NA	DBIL5P
23514	KIAA0146	No Change	NA	SPIDR
345222	C4orf44	No Change	NA	MSANTD1
326342	EMR4P	No Change	NA	ADGRE4P
91695	RRP7B	No Change	NA	RRP7BP
8531	CSDA	No Change	NA	YBX3
119032	C10orf32	No Change	NA	BORCS7
92521	CYTSB	No Change	NA	SPECC1
151393	FAM82A1	No Change	NA	RMDN2
23371	TENC1	No Change	NA	TNS2
55320	C14orf106	No Change	NA	MIS18BP1
55321	C20orf46	No Change	NA	TMEM74B
220930	LOC220930	No Change	NA	ZEB1-AS1
728723	LOC728723	No Change	NA	ZBED3-AS1
5379	PMS2L1	No Change	NA	PMS2P1
56851	C15orf24	No Change	NA	EMC7
56672	C11orf17	No Change	NA	AKIP1
51134	CCDC41	No Change	NA	CEP83
93343	FAM125A	No Change	NA	MVB12A
63914	C6orf164	No Change	NA	LINC01590
63915	MUTED	No Change	NA	BLOC1S5
122945	C14orf148	No Change	NA	NOXRED1
400759	LOC400759	No Change	NA	GBP1P1
85452	KIAA1751	No Change	NA	CFAP74
85457	KIAA1737	No Change	NA	CIPC
85459	KIAA1731	No Change	NA	CEP295
205717	KIAA2018	No Change	NA	USF3
57095	C1orf128	No Change	NA	PITHD1
100126270	ASFMR1	No Change	NA	FMR1-AS1
10367	CBARA1	No Change	NA	MICU1
163742	FLJ40434	No Change	NA	SLC25A3P1
100129066	LOC100129066	No Change	NA	UNQ6494
163747	C1orf177	No Change	NA	LEXM
8227	SFRS17A	No Change	NA	AKAP17A
401588	LOC401588	No Change	NA	ZNF674-AS1
9762	ProSAPiP1	No Change	NA	LZTS3
100144603	LOC100144603	No Change	NA	CHKB-AS1
9766	KIAA0247	No Change	NA	SUSD6
439931	FLJ39582	No Change	NA	THAP7-AS1
26823	?	No Change	NA	RNU12-2P
728264	LOC728264	No Change	NA	CARMN
10149	GPR64	No Change	NA	ADGRG2
387071	FAM136B	No Change	NA	FAM136BP
1556	CYP2B7P1	No Change	NA	CYP2B7P
283416	C12orf61	No Change	NA	LINC01465
91442	C19orf40	No Change	NA	FAAP24
79736	C17orf42	No Change	NA	TEFM
55515	ACCN4	No Change	NA	ASIC4
147727	LOC147727	No Change	NA	ILF3-AS1
201627	FAM116A	No Change	NA	DENND6A
285203	C3orf64	No Change	NA	EOGT
148189	LOC148189	No Change	NA	LINC00662
23255	KIAA0802	No Change	NA	MTCL1
23254	KAZ	No Change	NA	KAZN
6426	SFRS1	No Change	NA	SRSF1
6427	SFRS2	No Change	NA	SRSF2
6428	SFRS3	No Change	NA	SRSF3
6429	SFRS4	No Change	NA	SRSF4
27013	C2orf24	No Change	NA	CNPPD1
55791	C1orf103	No Change	NA	LRIF1
286042	FLJ10661	No Change	NA	FAM86B3P
389458	LOC389458	No Change	NA	RBAKDN
100288380	FAM7A2	No Change	NA	ULK4P2
96610	LOC96610	No Change	NA	BMS1P20
64748	LPPR2	No Change	NA	PLPPR2
57795	FAM5B	No Change	NA	BRINP2
57794	SF4	No Change	NA	SUGP1
142913	CFLP1	No Change	NA	CFL1P1
120400	FAM55A	No Change	NA	NXPE1
120406	FAM55B	No Change	NA	NXPE2
400165	C13orf35	No Change	NA	ATP11AUN
440456	PLEKHM1P	No Change	NA	PLEKHM1P1
100101266	LOC100101266	No Change	NA	HAVCR1P1
387804	C11orf90	No Change	NA	VSTM5
317716	BASE	No Change	NA	BPIFA4P
22820	COPG	No Change	NA	COPG1
339942	C3orf47	No Change	NA	H1FX-AS1
94104	GCFC1	No Change	NA	PAXBP1
10772	SFRS13A	No Change	NA	SRSF10
10778	ZNF271	No Change	NA	ZNF271P
285768	LOC285768	No Change	NA	LINC01622
151009	LOC151009	No Change	NA	LINC01106
152185	CCDC52	No Change	NA	SPICE1
84536	C21orf67	No Change	NA	LINC01547
440354	LOC440354	No Change	NA	SMG1P2
91056	DKFZp761E198	No Change	NA	AP5B1
148145	LOC148145	No Change	NA	LINC00906
5188	PET112L	No Change	NA	GATB
171423	PDIA3P	No Change	NA	PDIA3P1
89958	C9orf140	No Change	NA	SAPCD2
145978	NCRNA00052	No Change	NA	LINC00052
100130522	LOC100130522	No Change	NA	PARD6G-AS1
221322	C6orf170	No Change	NA	TBC1D32
23065	KIAA0090	No Change	NA	EMC1
126123	C19orf41	No Change	NA	IZUMO2
374977	C1orf175	No Change	NA	MROH7
646113	FLJ43390	No Change	NA	LINC00643
221188	GPR114	No Change	NA	ADGRG5
100129716	LOC100129716	No Change	NA	ARRDC3-AS1
23399	DULLARD	No Change	NA	CTDNEP1
158297	FAM154A	No Change	NA	SAXO1
81571	C9orf45	No Change	NA	MIR600HG
29965	C16orf5	No Change	NA	CDIP1
148046	C19orf23	No Change	NA	CIRBP-AS1
170487	C20orf134	No Change	NA	ACTL10
51337	C8orf55	No Change	NA	THEM6
56651	C18orf2	No Change	NA	LINC00470
116349	C5orf55	No Change	NA	EXOC3-AS1
56300	IL1F9	No Change	NA	IL36G
57653	KIAA1529	No Change	NA	LOC100499484-C9ORF174
57654	KIAA1530	No Change	NA	UVSSA
150135	C21orf129	No Change	NA	LINC00479
222699	LOC222699	No Change	NA	TOB2P1
193629	NCRNA00189	No Change	NA	LINC00189
90288	?	No Change	NA	EFCAB12
56160	NDNL2	No Change	NA	NSMCE3
9701	SAPS2	No Change	NA	PPP6R2
285375	LOC285375	No Change	NA	LINC00620
650368	LOC650368	No Change	NA	TSSC2
84709	C4orf49	No Change	NA	MGARP
149499	C1orf92	No Change	NA	LRRC71
440184	C14orf53	No Change	NA	LINC00238
285905	INTS4L1	No Change	NA	INTS4P1
112487	C14orf126	No Change	NA	DTD2
256076	COL29A1	No Change	NA	COL6A5
284424	C19orf30	No Change	NA	MIR7-3HG
8725	C19orf2	No Change	NA	URI1
100302650	LOC100302650	No Change	NA	BRE-AS1
100131551	LOC100131551	No Change	NA	LINC00887
126353	C19orf21	No Change	NA	MISP
391627	USP17	No Change	NA	USP17L9P
729375	LOC729375	No Change	NA	FAM86HP
100128327	BET3L	No Change	NA	TRAPPC3L
653553	?	No Change	NA	HSPB1P1
115939	C16orf42	No Change	NA	TSR3
348840	LOC348840	No Change	NA	ANKRD18DP
23277	KIAA0664	No Change	NA	CLUH
55592	GOLGA2B	No Change	NA	GOLGA2P5
205	AK3L1	No Change	NA	AK4
55848	C9orf46	No Change	NA	PLGRKT
22994	AZI1	No Change	NA	CEP131
25763	CXorf27	No Change	NA	HYPM
25764	C15orf63	No Change	NA	HYPK
85395	C21orf70	No Change	NA	FAM207A
283999	LOC283999	No Change	NA	TMEM235
283991	FAM100B	No Change	NA	UBALD2
285343	C3orf23	No Change	NA	TCAIM
26074	C20orf26	No Change	NA	CFAP61
57221	KIAA1244	No Change	NA	ARFGEF3
644873	FLJ33630	No Change	NA	LINC01184
116151	C20orf108	No Change	NA	FAM210B
90632	C6orf176	No Change	NA	LINC00473
285740	LOC285740	No Change	NA	PHACTR2-AS1
387751	GVIN1	No Change	NA	GVINP1
64207	C14orf4	No Change	NA	IRF2BPL
84513	PPAPDC1B	No Change	NA	PLPP5
84517	ARPM1	No Change	NA	ACTRT3
647309	LOC647309	No Change	NA	GMNC
100134229	LOC100134229	No Change	NA	JHDM1D-AS1
129285	KLRAQ1	No Change	NA	PPP1R21
283601	C14orf70	No Change	NA	LINC00523
283600	C14orf68	No Change	NA	SLC25A47
30001	ERO1L	No Change	NA	ERO1A
339779	C2orf53	No Change	NA	PRR30
653492	PSG10	No Change	NA	PSG10P
403313	PPAPDC2	No Change	NA	PLPP6
26515	FXC1	No Change	NA	TIMM10B
197187	MGC23284	No Change	NA	SNAI3-AS1
151534	LOC151534	No Change	NA	LBX2-AS1
3730	KAL1	No Change	NA	ANOS1
4796	NFKBIL2	No Change	NA	TONSL
81556	C15orf44	No Change	NA	VWA9
266977	GPR110	No Change	NA	ADGRF1
11251	GPR44	No Change	NA	PTGDR2
343990	C2orf55	No Change	NA	KIAA1211L
64789	DEM1	No Change	NA	EXO5
348249	CCL14-CCL15	No Change	NA	CCL15-CCL14
27202	GPR77	No Change	NA	C5AR2
92715	WDR85	No Change	NA	DPH7
166647	GPR125	No Change	NA	ADGRA3
4898	NRD1	No Change	NA	NRDC
10324	KBTBD10	No Change	NA	KLHL41
10328	COX4NB	No Change	NA	EMC8
9148	NEURL	No Change	NA	NEURL1
7978	MTERF	No Change	NA	MTERF1
9142	CXorf1	No Change	NA	TMEM257
401898	ZNF833	No Change	NA	ZNF833P
159686	CCDC147	No Change	NA	CFAP58
80868	HCG4P6	No Change	NA	HCG4B
728591	C13orf38	No Change	NA	CCDC169
83986	ITFG3	No Change	NA	FAM234A
729171	ANKRD20B	No Change	NA	ANKRD20A8P
29075	HSPC072	No Change	NA	LINC00652
347088	GPR144	No Change	NA	ADGRD2
643763	LOC643763	No Change	NA	UG0898H09
23215	BAT2L2	No Change	NA	PRRC2C
23742	C15orf2	No Change	NA	NPAP1
441457	FAM22G	No Change	NA	NUTM2G
286002	LOC286002	No Change	NA	SLC26A4-AS1
286006	C7orf53	No Change	NA	LSMEM1
392307	C9orf128	No Change	NA	FAM221B
619207	LOC619207	No Change	NA	SCART1
259308	C9orf144B	No Change	NA	FAM205A
200931	OSTalpha	No Change	NA	SLC51A
133383	C5orf35	No Change	NA	SETD9
9933	KIAA0020	No Change	NA	PUM3
619208	C6orf225	No Change	NA	FAM229B
158314	C9orf44	No Change	NA	LINC00475
100101938	LOC100101938	No Change	NA	ANKRD26P3
653140	C2orf84	No Change	NA	FAM228A
26098	C10orf137	No Change	NA	EDRF1
26099	C1orf144	No Change	NA	SZRD1
26097	C1orf77	No Change	NA	CHTOP
201229	C17orf108	No Change	NA	LYRM9
5001	ORC5L	No Change	NA	ORC5
5000	ORC4L	No Change	NA	ORC4
90381	C15orf42	No Change	NA	TICRR
122046	C13orf26	No Change	NA	TEX26
153328	LOC153328	No Change	NA	SLC25A48
246705	C21orf94	No Change	NA	LINC00314
57542	KLHDC5	No Change	NA	KLHL42
388428	LOC388428	No Change	NA	AATK-AS1
8934	RAB7L1	No Change	NA	RAB29
196483	FAM86A	No Change	NA	EEF2KMT
647288	LOC647288	No Change	NA	CTAGE11P
79091	C16orf68	No Change	NA	METTL22
80217	C10orf79	No Change	NA	CFAP43
723809	LOC723809	No Change	NA	LHFPL3-AS2
84996	C21orf119	No Change	NA	URB1-AS1
643155	C5orf43	No Change	NA	SMIM15
728788	?	No Change	NA	ANKRD20A20P
26	ABP1	No Change	NA	AOC1
642826	LOC642826	No Change	NA	BMS1P6
51372	CCDC72	No Change	NA	TMA7
51374	C2orf28	No Change	NA	ATRAID
100131213	C10orf41	No Change	NA	ZNF503-AS2
5301	PIN1L	No Change	NA	PIN1P1
649446	FLJ35776	No Change	NA	DLGAP1-AS1
64762	FAM59A	No Change	NA	GAREM1
51198	C9orf53	No Change	NA	CDKN2A-AS1
253782	LASS6	No Change	NA	CERS6
391037	SKINTL	No Change	NA	SKINT1L
374864	C18orf34	No Change	NA	CCDC178
135295	SFRS13B	No Change	NA	SRSF12
6734	SRPR	No Change	NA	SRPRA
10650	SLMO1	No Change	NA	PRELID3A
7919	BAT1	No Change	NA	DDX39B
7918	BAT4	No Change	NA	GPANK1
7917	BAT3	No Change	NA	BAG6
7916	BAT2	No Change	NA	PRRC2A
26138	C8orf71	No Change	NA	LINC00588
152756	C4orf39	No Change	NA	FAM218A
654434	C17orf86	No Change	NA	SNHG20
654433	LOC654433	No Change	NA	PAX8-AS1
100303728	LOC100303728	No Change	NA	SLC25A5-AS1
340390	KIAA1875	No Change	NA	WDR97
400696	LOC400696	No Change	NA	LGALS17A
391356	C2orf79	No Change	NA	PTRHD1
220832	FABP5L3	No Change	NA	FABP5P3
122258	C13orf28	No Change	NA	SPACA7
54067	C21orf49	No Change	NA	C21orf62-AS1
54065	FAM165B	No Change	NA	SMIM11A
387646	LOC387646	No Change	NA	LRRC37A6P
91283	C9orf30	No Change	NA	MSANTD3
55853	C10orf110	No Change	NA	IDI2-AS1
339788	LOC339788	No Change	NA	LINC00298
729156	LOC729156	No Change	NA	GTF2IRD1P1
55855	FAM45B	No Change	NA	FAM45BP
196541	C13orf39	No Change	NA	METTL21C
29058	C20orf30	No Change	NA	TMEM230
100128811	LOC100128811	No Change	NA	GPR158-AS1
92482	NCRNA00081	No Change	NA	BBIP1
221264	AKD1	No Change	NA	AK9
26084	SGEF	No Change	NA	ARHGEF26
55088	C10orf118	No Change	NA	CCDC186
55731	C17orf63	No Change	NA	FAM222B
91828	C14orf73	No Change	NA	EXOC3L4
389161	C3orf16	No Change	NA	ANKUB1
374383	DKFZp686O24166	No Change	NA	NCR3LG1
151477	C2orf52	No Change	NA	LINC00471
55888	ZNF167	No Change	NA	ZKSCAN7
4809	NHP2L1	No Change	NA	SNU13
285961	SEPT7L	No Change	NA	SEPT7P9
100134713	LOC100134713	No Change	NA	NDUFB2-AS1
414235	C10orf108	No Change	NA	PRR26
257313	UTS2D	No Change	NA	UTS2B
100133205	C6orf41	No Change	NA	LINC00240
23543	RBM9	No Change	NA	RBFOX2
646627	LOC646627	No Change	NA	LYPD8
56286	DAD1L	No Change	NA	DAD1P1
90417	C15orf23	No Change	NA	KNSTRN
79804	NBLA00301	No Change	NA	HAND2-AS1
140828	C20orf56	No Change	NA	LINC00261
84081	CCDC55	No Change	NA	NSRP1
84080	C16orf48	No Change	NA	ENKD1
85441	PRIC285	No Change	NA	HELZ2
55671	SMEK1	No Change	NA	PPP4R3A
345079	ANKRD56	No Change	NA	SOWAHB
204219	LASS3	No Change	NA	CERS3
54908	CCDC99	No Change	NA	SPDL1
54906	C10orf18	No Change	NA	FAM208B
643210	FLJ40292	No Change	NA	EHMT1-IT1
284071	C17orf104	No Change	NA	MEIOC
7117	TMSL3	No Change	NA	TMSB4XP8
84553	C6orf168	No Change	NA	FAXC
6998	TDGF3	No Change	NA	TDGF1P3
284618	C1orf104	No Change	NA	RUSC1-AS1
347127	FLJ43950	No Change	NA	SPATA31D5P
284900	LOC284900	No Change	NA	TTC28-AS1
100130581	LOC100130581	No Change	NA	LINC00910
151649	C3orf48	No Change	NA	PP2D1
339005	WHAMML1	No Change	NA	WHAMMP3
4207	LOC729991-MEF2B	No Change	NA	MEF2BNB-MEF2B
149992	C21orf99	No Change	NA	ANKRD30BP2
221749	C6orf145	No Change	NA	PXDC1
405754	ERVFRDE1	No Change	NA	ERVFRD-1
286343	C9orf150	No Change	NA	LURAP1L
124045	C16orf55	No Change	NA	SPATA33
389333	LOC389333	No Change	NA	PROB1
10929	SFRS2B	No Change	NA	SRSF8
118421	NCRNA00161	No Change	NA	LINC00161
9147	SDCCAG1	No Change	NA	NEMF
254528	C16orf73	No Change	NA	MEIOB
22947	DUX4	No Change	NA	DUX4L1
285548	LOC285548	No Change	NA	LINC01096
56942	C16orf61	No Change	NA	CMC2
56941	C3orf37	No Change	NA	HMCES
56946	C11orf30	No Change	NA	EMSY
84766	EFCAB4B	No Change	NA	CRACR2A
54734	RAB39	No Change	NA	RAB39A
257062	TMEM146	No Change	NA	CATSPERD
284440	LOC284440	No Change	NA	LINC00663
389741	MGC21881	No Change	NA	GLIDR
136647	C7orf11	No Change	NA	MPLKIP
100129387	LOC100129387	No Change	NA	GABPB1-AS1
647121	LOC647121	No Change	NA	EMBP1
29034	LOC29034	No Change	NA	CPS1-IT1
79667	FLJ13197	No Change	NA	KLF3-AS1
59271	C21orf63	No Change	NA	EVA1C
6936	C2orf3	No Change	NA	GCFC2
8123	PAR5	No Change	NA	PWAR5
221241	C18orf20	No Change	NA	LINC00305
100128385	C9orf110	No Change	NA	FAM225B
119392	C10orf78	No Change	NA	SFR1
145508	C14orf145	No Change	NA	CEP128
338651	LOC338651	No Change	NA	KRTAP5-AS1
114821	SCAND3	No Change	NA	ZBED9
55714	ODZ3	No Change	NA	TENM3
140683	C20orf70	No Change	NA	BPIFA2
84726	BAT2L1	No Change	NA	PRRC2B
644997	C1orf200	No Change	NA	PIK3CD-AS1
339201	C17orf65	No Change	NA	ASB16-AS1
147947	ZNF542	No Change	NA	ZNF542P
646600	C3orf65	No Change	NA	IGF2BP2-AS1
55571	C2orf29	No Change	NA	CNOT11
55578	FAM48A	No Change	NA	SUPT20H
56006	C19orf61	No Change	NA	SMG9
56005	C19orf10	No Change	NA	MYDGF
359710	C20orf185	No Change	NA	BPIFB3
439927	C1orf180	No Change	NA	LINC01555
128229	C1orf182	No Change	NA	TSACC
200205	C1orf69	No Change	NA	IBA57
256227	MGC87042	No Change	NA	STEAP1B
550643	LOC550643	No Change	NA	LINC01420
80862	NCRNA00171	No Change	NA	ZNRD1-AS1
100134934	C17orf106	No Change	NA	TEN1
219990	PLAC1L	No Change	NA	OOSP2
54920	DUS2L	No Change	NA	DUS2
51352	WIT1	No Change	NA	WT1-AS
51251	NT5C3	No Change	NA	NT5C3A
100130613	CXorf64	No Change	NA	PRR32
388685	FLJ39739	No Change	NA	LINC01138
79854	NCRNA00115	No Change	NA	LINC00115
64397	ZFP106	No Change	NA	ZNF106
645455	CEP170L	No Change	NA	CEP170P1
285987	DLX6AS	No Change	NA	DLX6-AS1
643008	LOC643008	No Change	NA	SMIM5
284058	KIAA1267	No Change	NA	KANSL1
79581	GPR172A	No Change	NA	SLC52A2
5540	PPYR1	No Change	NA	NPY4R
648740	LOC648740	No Change	NA	ACTG1P4
5891	RAGE	No Change	NA	MOK
401135	SYT14L	No Change	NA	SYT14P1
286187	LRRC67	No Change	NA	PPP1R42
389643	C8orf80	No Change	NA	NUGGC
125170	SMCR7	No Change	NA	MIEF2
84848	MGC16121	No Change	NA	MIR503HG
677821	SNORA39	No Change	NA	SNORA71E
677826	SNORA45	No Change	NA	SNORA3B
9473	C1orf38	No Change	NA	THEMIS2
440574	C1orf151	No Change	NA	MINOS1
653645	DHX40P1	No Change	NA	TBC1D3P1-DHX40P1
26175	C14orf109	No Change	NA	TMEM251
55745	MUDENG	No Change	NA	AP5M1
57035	C1orf63	No Change	NA	RSRP1
576	BAI2	No Change	NA	ADGRB2
81892	C14orf156	No Change	NA	SLIRP
400657	LOC400657	No Change	NA	LINC00909
677779	C3orf66	No Change	NA	LINC00488
55924	C1orf183	No Change	NA	FAM212B
780776	FAM18A	No Change	NA	TVP23A
9780	FAM38A	No Change	NA	PIEZO1
100101490	PSIMCT-1	No Change	NA	MCTS2P
54718	BTN2A3	No Change	NA	BTN2A3P
54715	A2BP1	No Change	NA	RBFOX1
285045	LOC285045	No Change	NA	LINC00486
284402	SCGBL	No Change	NA	SCGB2B2
100130932	LOC100130932	No Change	NA	SNRPGP15
100130933	LOC100130933	No Change	NA	SMIM6
646498	LOC646498	No Change	NA	C3orf84
196500	C12orf53	No Change	NA	PIANP
29018	PRO1768	No Change	NA	FOXN3-AS2
125144	NCRNA00188	No Change	NA	LRRC75A-AS1
79709	GLT25D1	No Change	NA	COLGALT1
221223	CES7	No Change	NA	CES5A
541471	LOC541471	No Change	NA	MIR4435-2HG
7936	RDBP	No Change	NA	NELFE
219793	C10orf27	No Change	NA	TBATA
126536	LOC126536	No Change	NA	LINC00661
729176	LOC729176	No Change	NA	KATNBL1P6
642475	C8orf73	No Change	NA	MROH6
728606	LOC728606	No Change	NA	PCAT18
257358	LOC257358	No Change	NA	LINC01366
51093	C1orf66	No Change	NA	RRNAD1
55776	C6orf64	No Change	NA	SAYSD1
55779	WDR52	No Change	NA	CFAP44
100188947	LOC100188947	No Change	NA	HECTD2-AS1
27161	EIF2C2	No Change	NA	AGO2
84334	C14orf153	No Change	NA	APOPT1
80233	C17orf70	No Change	NA	FAAP100
64288	ZNF323	No Change	NA	ZSCAN31
64283	RGNEF	No Change	NA	ARHGEF28
441191	RNF216L	No Change	NA	RNF216P1
340591	CA5BP	No Change	NA	CA5BP1
647979	LOC647979	No Change	NA	NORAD
6309	SC5DL	No Change	NA	SC5D
6307	SC4MOL	No Change	NA	MSMO1
9315	C5orf13	No Change	NA	NREP
9311	ACCN3	No Change	NA	ASIC3
54942	C9orf6	No Change	NA	FAM206A
1632	DCI	No Change	NA	ECI1
29956	LASS2	No Change	NA	CERS2
168474	LOC168474	No Change	NA	SEPHS1P1
199990	C1orf86	No Change	NA	FAAP20
91300	C19orf22	No Change	NA	R3HDM4
91304	C19orf6	No Change	NA	TMEM259
40	ACCN1	No Change	NA	ASIC2
41	ACCN2	No Change	NA	ASIC1
7741	ZNF187	No Change	NA	ZSCAN26
23199	KIAA0182	No Change	NA	GSE1
93654	ST7OT2	No Change	NA	ST7-AS2
100189589	LOC100189589	No Change	NA	DCTN1-AS1
87769	A2LD1	No Change	NA	GGACT
92659	LOC92659	No Change	NA	MAFG-AS1
51287	CHCHD8	No Change	NA	COA4
55908	LOC55908	No Change	NA	ANGPTL8
55904	MLL5	No Change	NA	KMT2E
100188954	NCRNA00093	No Change	NA	DNMBP-AS1
221785	ZNF498	No Change	NA	ZSCAN25
677846	SNORA80	No Change	NA	SNORA80A
283870	C16orf79	No Change	NA	BRICD5
154386	C6orf195	No Change	NA	LINC01600
440556	FLJ42875	No Change	NA	LINC00982
81626	C1orf14	No Change	NA	SHCBP1L
81627	C1orf25	No Change	NA	TRMT1L
22909	MTMR15	No Change	NA	FAN1
220004	C11orf66	No Change	NA	PPP1R32
400752	LOC400752	No Change	NA	LINC01144
54886	LPPR1	No Change	NA	PLPPR1
122769	PPIL5	No Change	NA	LRR1
100132929	FAM25B	No Change	NA	FAM25BP
148523	C1orf51	No Change	NA	CIART
347376	LOC347376	No Change	NA	H3F3AP5
221710	LOC221710	No Change	NA	SMIM13
54084	C21orf29	No Change	NA	TSPEAR
51734	SEPX1	No Change	NA	MSRB1
8683	SFRS9	No Change	NA	SRSF9
54088	NCRNA00113	No Change	NA	LINC00113
54089	NCRNA00112	No Change	NA	LINC00112
79625	C4orf31	No Change	NA	NDNF
79624	C6orf211	No Change	NA	ARMT1
221718	C6orf218	No Change	NA	LINC00518
64773	FAM113A	No Change	NA	PCED1A
399717	FLJ45983	No Change	NA	GATA3-AS1
339521	FAM58B	No Change	NA	FAM58BP
339524	LOC339524	No Change	NA	LINC01140
374491	LOC374491	No Change	NA	TPTE2P6
728661	SLC35E2	No Change	NA	SLC35E2B
253635	CCDC75	No Change	NA	GPATCH11
100271836	LOC100271836	No Change	NA	SMG1P3
55026	FAM70A	No Change	NA	TMEM255A
163859	C1orf55	No Change	NA	SDE2
116933	CLRN1OS	No Change	NA	CLRN1-AS1
374378	GALNTL4	No Change	NA	GALNT18
100144596	NCRNA00029	No Change	NA	LINC00029
27143	KIAA1274	No Change	NA	PALD1
253724	LOC253724	No Change	NA	TTC41P
100132247	LOC100132247	No Change	NA	NPIPB5
5969	REG1P	No Change	NA	REG1CP
387590	psiTPTE22	No Change	NA	TPTEP1
80215	C21orf96	No Change	NA	RUNX1-IT1
340602	?	No Change	NA	CXorf67
100289341	LOC100289341	No Change	NA	MAN1B1-AS1
146481	LOC146481	No Change	NA	FRG2DP
441177	LOC441177	No Change	NA	LINC00602
54967	CXorf48	No Change	NA	CT55
84060	C7orf64	No Change	NA	RBM48
84066	C1orf49	No Change	NA	TEX35
387486	C21orf131	No Change	NA	LINC00320
23338	PHF15	No Change	NA	JADE2
168455	FLJ36031	No Change	NA	CCDC71L
163404	LPPR5	No Change	NA	PLPPR5
317648	C4orf10	No Change	NA	NOP14-AS1
246126	CYorf15A	No Change	NA	TXLNGY
79018	C17orf39	No Change	NA	GID4
400120	C13orf36	No Change	NA	SERTM1
26095	PTPN20B	No Change	NA	PTPN20
147429	C18orf16	No Change	NA	AQP4-AS1
643664	AMAC1L3	No Change	NA	SLC35G6
81671	TMEM49	No Change	NA	VMP1
100131193	LOC100131193	No Change	NA	CCDC183-AS1
127254	C1orf173	No Change	NA	ERICH3
129881	C2orf77	No Change	NA	CCDC173
25957	SFRS18	No Change	NA	PNISR
286144	C8orf83	No Change	NA	TRIQK
112597	NCRNA00152	No Change	NA	LINC00152
401137	C4orf40	No Change	NA	PRR27
390928	PAPL	No Change	NA	ACP7
338557	GPR120	No Change	NA	FFAR4
55257	C20orf20	No Change	NA	MRGBP
84809	CROCCL1	No Change	NA	CROCCP2
84808	C1orf170	No Change	NA	PERM1
64850	AGXT2L1	No Change	NA	ETNPPL
10985	GCN1L1	No Change	NA	GCN1
84803	AGPAT9	No Change	NA	GPAT3
286967	NCRNA00204B	No Change	NA	FAM223B
201562	PTPLB	No Change	NA	HACD2
54754	FAM22F	No Change	NA	NUTM2F
147650	NCRNA00085	No Change	NA	SPACA6
730811	LOC730811	No Change	NA	MYT1L-AS1
79831	JMJD5	No Change	NA	KDM8
79834	SGK269	No Change	NA	PEAK1
222166	C7orf41	No Change	NA	MTURN
153222	C5orf41	No Change	NA	CREBRF
51669	TMEM66	No Change	NA	SARAF
440145	C13orf37	No Change	NA	MZT1
163183	C19orf46	No Change	NA	SYNE4
11129	SFRS16	No Change	NA	CLASRP
254013	C12orf72	No Change	NA	ETFBKMT
80006	C5orf44	No Change	NA	TRAPPC13
84658	EMR3	No Change	NA	ADGRE3
144742	LOC144742	No Change	NA	LINC00934
84657	C3orf42	No Change	NA	LINC00852
439965	FAM35B2	No Change	NA	FAM35DP
252946	FAM197Y2	No Change	NA	FAM197Y2P
283521	FLJ37307	No Change	NA	LINC00282
729678	LOC729678	No Change	NA	LINC00847
10212	DDX39	No Change	NA	DDX39A
285555	C4orf37	No Change	NA	STPG2
360030	LOC360030	No Change	NA	NANOGNB
8634	RTCD1	No Change	NA	RTCA
137682	C8orf38	No Change	NA	NDUFAF6
595101	LOC595101	No Change	NA	SMG1P5
100133991	LOC100133991	No Change	NA	MAP3K14-AS1
375307	C2orf62	No Change	NA	CATIP
728643	LOC728643	No Change	NA	HNRNPA1P33
728640	LOC728640	No Change	NA	FAM133CP
728130	FAM22D	No Change	NA	NUTM2D
9991	ROD1	No Change	NA	PTBP3
29902	C12orf24	No Change	NA	FAM216A
79603	LASS4	No Change	NA	CERS4
100128542	LOC100128542	No Change	NA	BET1P1
51054	PLEKHA9	No Change	NA	PLEKHA8P1
51057	C2orf86	No Change	NA	WDPCP
220136	CCDC11	No Change	NA	CFAP53
55004	C11orf59	No Change	NA	LAMTOR1
158234	RG9MTD3	No Change	NA	TRMT10B
145165	FAM10A4	No Change	NA	ST13P4
729515	C6orf35	No Change	NA	TMEM242
150568	LOC150568	No Change	NA	LINC01102
80763	C12orf39	No Change	NA	SPX
254312	LOC254312	No Change	NA	LINC00710
56204	KIAA1370	No Change	NA	FAM214A
201973	CCDC111	No Change	NA	PRIMPOL
90586	LOC90586	No Change	NA	AOC4P
286467	LOC286467	No Change	NA	FIRRE
56063	C1orf91	No Change	NA	TMEM234
10178	ODZ1	No Change	NA	TENM1
9605	C16orf7	No Change	NA	VPS9D1
10175	CNIH	No Change	NA	CNIH1
283050	LOC283050	No Change	NA	ZMIZ1-AS1
255025	LOC255025	No Change	NA	LINC00879
4998	ORC1L	No Change	NA	ORC1
113451	ADC	No Change	NA	AZIN2
2852	GPER	No Change	NA	GPER1
285962	FLJ40852	No Change	NA	WEE2-AS1
285966	FAM115C	No Change	NA	TCAF2
79035	OBFC2B	No Change	NA	NABP2
79036	C19orf50	No Change	NA	KXD1
79903	NAT15	No Change	NA	NAA60
79609	C14orf138	No Change	NA	VCPKMT
375791	C9orf169	No Change	NA	CYSRT1
254863	C17orf61	No Change	NA	TMEM256
255919	TMEM188	No Change	NA	CNEP1R1
339229	C17orf90	No Change	NA	OXLD1
286135	LOC286135	No Change	NA	FAM183CP
647087	PL-5283	No Change	NA	C7orf73
256646	C15orf55	No Change	NA	NUTM1
1238	CCBP2	No Change	NA	ACKR2
123264	OSTBETA	No Change	NA	SLC51B
338799	LOC338799	No Change	NA	LINC01089
92340	C17orf72	No Change	NA	PRR29
92342	C1orf156	No Change	NA	METTL18
9767	PHF16	No Change	NA	JADE3
221438	TREML2P1	No Change	NA	TREML5P
642597	LOC642597	No Change	NA	C18orf42
100216545	LOC100216545	No Change	NA	KMT2E-AS1
100133612	LOC100133612	No Change	NA	LINC01134
54072	NCRNA00158	No Change	NA	LINC00158
100287569	NCRNA00173	No Change	NA	LINC00173
646450	C3orf71	No Change	NA	ARIH2OS
138649	ANKRD19	No Change	NA	ANKRD19P
100130148	LOC100130148	No Change	NA	MAPT-IT1
60684	C4orf41	No Change	NA	TRAPPC11
85019	C18orf45	No Change	NA	TMEM241
349114	LOC349114	No Change	NA	LINC00265
146325	C16orf11	No Change	NA	PRR35
387036	GUSBL1	No Change	NA	GUSBP2
400891	LOC400891	No Change	NA	LRRC74B
49854	ZNF295	No Change	NA	ZBTB21
100036566	HBII-52-45	No Change	NA	SNORD115-45
100036567	HBII-52-46	No Change	NA	SNORD115-47
100036564	HBII-52-27	No Change	NA	SNORD115-27
100036565	HBII-52-28	No Change	NA	SNORD115-28
80024	SLC24A6	No Change	NA	SLC8B1
284739	NCRNA00176	No Change	NA	LINC00176
283507	SUGT1L1	No Change	NA	SUGT1P3
344405	PRDXDD1P	No Change	NA	PRORSD1P
574036	C1orf133	No Change	NA	SERTAD4-AS1
158801	CXorf42	No Change	NA	NKAPP1
84814	PPAPDC3	No Change	NA	PLPP7
728118	FAM22A	No Change	NA	NUTM2A
790955	C11orf83	No Change	NA	UQCC3
8611	PPAP2A	No Change	NA	PLPP1
8613	PPAP2B	No Change	NA	PLPP3
8612	PPAP2C	No Change	NA	PLPP2
145497	C14orf166B	No Change	NA	LRRC74A
51030	FAM18B	No Change	NA	TVP23B
55065	GPR172B	No Change	NA	SLC52A1
55064	C9orf68	No Change	NA	SPATA6L
340277	C7orf46	No Change	NA	FAM221A
55069	C7orf42	No Change	NA	TMEM248
144486	LOC144486	No Change	NA	CEP83-AS1
144811	C13orf31	No Change	NA	LACC1
155060	?	No Change	NA	LOC155060
100101467	ZNF397OS	No Change	NA	ZSCAN30
347365	ITIH5L	No Change	NA	ITIH6
120376	C11orf93	No Change	NA	COLCA2
23349	KIAA1045	No Change	NA	PHF24
63894	VIPAR	No Change	NA	VIPAS39
643365	FLJ44054	No Change	NA	LINC00452
55684	C9orf86	No Change	NA	RABL6
55683	KIAA1310	No Change	NA	KANSL3
170954	KIAA1949	No Change	NA	PPP1R18
135154	C6orf57	No Change	NA	SDHAF4
10826	C5orf4	No Change	NA	FAXDC2
57136	C20orf3	No Change	NA	APMAP
389541	C7orf59	No Change	NA	LAMTOR4
100144748	KILLIN	No Change	NA	KLLN
344595	LOC344595	No Change	NA	DUBR
79974	C7orf58	No Change	NA	CPED1
100188949	LOC100188949	No Change	NA	LINC00426
192670	EIF2C4	No Change	NA	AGO4
116028	C16orf75	No Change	NA	RMI2
84284	C1orf57	No Change	NA	NTPCR
375940	FLJ46361	No Change	NA	DMBT1P1
58483	C9orf27	No Change	NA	LINC00474
285908	NCRNA00174	No Change	NA	LINC00174
58489	FAM108C1	No Change	NA	ABHD17C
100048912	CDKN2BAS	No Change	NA	CDKN2B-AS1
347454	ANKRD58	No Change	NA	SOWAHD
137964	AGPAT6	No Change	NA	GPAT4
29931	LOH3CR2A	No Change	NA	LINC00312
161176	C14orf49	No Change	NA	SYNE3
283197	C11orf64	No Change	NA	LINC00301
286464	CXorf59	No Change	NA	CFAP47
286103	C8orf77	No Change	NA	ZNF252P-AS1
55472	C8orf39	No Change	NA	RBM12B-AS1
91948	LOC91948	No Change	NA	LINC00923
55471	C2orf56	No Change	NA	NDUFAF7
692099	FAM86D	No Change	NA	FAM86DP
9813	KIAA0494	No Change	NA	EFCAB14
145820	LOC145820	No Change	NA	LINC00924
55214	LEPREL1	No Change	NA	P3H2
158035	NCRNA00032	No Change	NA	LINC00032
153918	C6orf94	No Change	NA	ZC2HC1B
160492	IFLTD1	No Change	NA	LMNTD1
196968	C15orf51	No Change	NA	DNM1P46
441452	FAM75C1	No Change	NA	SPATA31C1
729786	GOLGA8C	No Change	NA	GOLGA8CP
283102	FLJ46111	No Change	NA	KRT8P41
140706	C20orf160	No Change	NA	CCM2L
140701	C20orf135	No Change	NA	ABHD16B
100131211	TMEM194B	No Change	NA	NEMP2
146705	C17orf56	No Change	NA	ENTHD2
162632	LOC162632	No Change	NA	USP32P1
54827	FAM55D	No Change	NA	NXPE4
54823	C1orf26	No Change	NA	SWT1
388946	LOC388946	No Change	NA	TMEM247
29094	HSPC159	No Change	NA	LGALSL
29092	HSPC157	No Change	NA	LINC00339
440888	FKSG73	No Change	NA	ACTR3BP2
753	C18orf1	No Change	NA	LDLRAD4
750	C16orf3	No Change	NA	GAS8-AS1
414767	C14orf165	No Change	NA	LINC00596
339479	FAM5C	No Change	NA	BRINP3
23587	C17orf81	No Change	NA	ELP5
118426	LOH12CR1	No Change	NA	BORCS5
51012	SLMO2	No Change	NA	PRELID3B
51016	FAM158A	No Change	NA	EMC9
136227	EMID2	No Change	NA	COL26A1
253039	LOC253039	No Change	NA	PSMD5-AS1
401093	LOC401093	No Change	NA	MBNL1-AS1
643382	C14orf176	No Change	NA	TMEM253
152078	C3orf55	No Change	NA	PQLC2L
6650	SOLH	No Change	NA	CAPN15
57119	SPINLW1	No Change	NA	EPPIN
58509	C19orf29	No Change	NA	CACTIN
653784	FAM128A	No Change	NA	MZT2A
26258	PLDN	No Change	NA	BLOC1S6
120534	C11orf46	No Change	NA	ARL14EP
80185	C8orf41	No Change	NA	TTI2
79953	TMEM90B	No Change	NA	SYNDIG1
404744	AAA1	No Change	NA	NPSR1-AS1
440423	SUZ12P	No Change	NA	SUZ12P1
90768	MGC45800	No Change	NA	LOC90768
112817	DHDPSL	No Change	NA	HOGA1
255798	C3orf43	No Change	NA	SMCO1
284525	SLC9A11	No Change	NA	SLC9C2
132228	C3orf45	No Change	NA	LSMEM2
169693	C9orf71	No Change	NA	TMEM252
57805	KIAA1967	No Change	NA	CCAR2
727677	LOC727677	No Change	NA	CASC8
388886	C22orf36	No Change	NA	LRRC75B
169436	C9orf96	No Change	NA	STKLD1
79783	C7orf10	No Change	NA	SUGCT
283174	LOC283174	No Change	NA	MIR4697HG
375757	C9orf119	No Change	NA	SWI5
9890	LPPR4	No Change	NA	PLPPR4
55181	C17orf71	No Change	NA	SMG8
55184	C20orf12	No Change	NA	DZANK1
57562	KIAA1377	No Change	NA	CEP126
23117	NPIPL3	No Change	NA	NPIPB3
646023	C22orf45	No Change	NA	ADORA2A-AS1
100128640	LOC100128640	No Change	NA	ACVR2B-AS1
10189	THOC4	No Change	NA	ALYREF
56181	FAM54B	No Change	NA	MTFR1L
29086	C19orf62	No Change	NA	BABAM1
401387	LOC401387	No Change	NA	LRRD1
148137	C19orf55	No Change	NA	PROSER3
100129482	ZNF37B	No Change	NA	ZNF37BP
55233	MOBKL1B	No Change	NA	MOB1A
55237	C14orf115	No Change	NA	VRTN
79892	C10orf119	No Change	NA	MCMBP
56985	C17orf48	No Change	NA	ADPRM
56983	KTELC1	No Change	NA	POGLUT1
57589	KIAA1432	No Change	NA	RIC1
128506	C20orf123	No Change	NA	OCSTAMP
57585	CRAMP1L	No Change	NA	CRAMP1
57587	KIAA1430	No Change	NA	CFAP97
100133308	LOC100133308	No Change	NA	RSU1P2
64433	C7orf4	No Change	NA	LINC00244
64430	C14orf135	No Change	NA	PCNXL4
147407	MCART2	No Change	NA	SLC25A52
80069	C6orf208	No Change	NA	LINC00574
100133545	LOC100133545	No Change	NA	MRPL23-AS1
203413	CXorf61	No Change	NA	CT83
283673	TMEM84	No Change	NA	EWSAT1
401634	GOLGA2P3	No Change	NA	GOLGA2P3Y
653687	CXorf50B	No Change	NA	FAM226B
113802	C1orf59	No Change	NA	HENMT1
23284	LPHN3	No Change	NA	ADGRL3
84366	PRAC	No Change	NA	PRAC1
388341	C17orf76	No Change	NA	LRRC75A
642946	LQK1	No Change	NA	FLVCR1-AS1
91775	FAM55C	No Change	NA	NXPE3
221393	GPR115	No Change	NA	ADGRF4
221395	GPR116	No Change	NA	ADGRF5
84740	LOC84740	No Change	NA	AFAP1-AS1
497258	BDNFOS	No Change	NA	BDNF-AS
25819	CCRN4L	No Change	NA	NOCT
64792	RABL5	No Change	NA	IFT22
51691	NAA38	No Change	NA	LSM8
340393	C8ORFK29	No Change	NA	TMEM249
266695	DKFZp686A1627	No Change	NA	PHF2P1
645840	TXNRD3IT1	No Change	NA	TXNRD3NB
220594	LOC220594	No Change	NA	USP32P2
441094	FLJ42709	No Change	NA	NR2F1-AS1
154089	MGC34034	No Change	NA	LINC01312
389761	FLJ43859	No Change	NA	SPATA31D4
389762	FLJ44082	No Change	NA	SPATA31D3
84962	JUB	No Change	NA	AJUBA
[truncated: 176 more rows]
